# Supplementary material for: Effects of lipid extract from blue mussel (Mytilus edulis) on gut microbiota, and its relationship with glycemic traits in type 2 diabetes mellitus patients: a double-blind randomized controlled trial
Source: Royal Society of Chemistry journal article supplement (doi:10.1039/d3fo01491f), 2023-01-01

## SUPPLEMENTARY MATERIALS

**Table S1** The gradient elution of free furan fatty acids

| Time (min) | A(%) | B(%) | Flow(mL/min) |
|------------|------|------|--------------|
| 0          | 90   | 10   | 0.4          |
| 1          | 80   | 20   | 0.4          |
| 4          | 70   | 30   | 0.4          |
| 7          | 60   | 40   | 0.4          |
| 13         | 50   | 50   | 0.4          |
| 20         | 50   | 50   | 0.4          |
| 21         | 40   | 60   | 0.4          |
| 25         | 40   | 60   | 0.4          |
| 26         | 30   | 70   | 0.4          |
| 27         | 30   | 70   | 0.4          |
| 28         | 0    | 100  | 0.4          |
| 32         | 0    | 100  | 0.4          |
| 33         | 90   | 10   | 0.4          |

**Table S2** The gradient elution of CMPF

| Time (min) | A(%) | B(%) | Flow(mL/min) |
|------------|------|------|--------------|
| 0          | 90   | 10   | 0.4          |
| 1          | 90   | 10   | 0.4          |
| 2          | 70   | 30   | 0.4          |
| 5          | 20   | 80   | 0.4          |
| 6          | 0    | 100  | 0.4          |
| 7          | 0    | 100  | 0.4          |
| 7          | 90   | 10   | 0.4          |
| 10         | 90   | 10   | 0.4          |

**Table S3** The gradient elution of astaxanthin

| Time (min) | A(%) | B(%) | C(%) |
|------------|------|------|------|
| 0          | 81   | 15   | 4    |
| 15         | 66   | 30   | 4    |
| 23         | 16   | 80   | 4    |
| 27         | 16   | 80   | 4    |
| 30         | 81   | 15   | 4    |
| 35         | 81   | 15   | 4    |

**Table S4** Dietary intake in treatment groups.

|                                    | FO (n=4)       | BMLE (n=5)     | CO (n=4)           | p    |
|------------------------------------|----------------|----------------|--------------------|------|
| Energy (kcal)                      | 1370.82±352.81 | 2150.64±701.88 | 1120.59±419.9<br>9 | 0.07 |
| Protein (g)                        | 69.39±15.65    | 101.42±26.54   | 63.16±22.61        | 0.10 |
| Fat (g)                            | 55.85±18.67    | 101.64±44.39   | 42.38±11.70        | 0.06 |
| Carbohydrate (g)                   | 147.64±44.02   | 204.96±57.77   | 121.48±60.36       | 0.17 |
| Fibre (g)                          | 13.04±2.87     | 22.63±14.73    | 13.15±4.94         | 0.36 |
| Cholesterol (mg)                   | 577.54±392.62  | 606.37±471.27  | 933.18±997.44      | 0.76 |
| Saturated fatty acid<br>(g)        | 8.75±3.21      | 18.03±13.66    | 8.57±4.07          | 0.32 |
| Monounsaturated<br>fatty acids (g) | 7.91±4.49      | 13.37±8.93     | 6.58±3.25          | 0.36 |
| Polyunsaturated fatty<br>acids (g) | 9.37±1.73      | 23.16±28.58    | 8.83±6.19          | 0.51 |
| Total fatty acid (g)               | 26.41±9.13     | 55.21±41.17    | 24.42±12.88        | 0.28 |

Nutrients intake was calculated by Nutrition System of Traditional Chinese Medicine Combining with Western Medicine MX2 (V12.0).

**Table S5** Correlation between changes of furan fatty acids and CMPF and changes of abundance of inflammatory factor, blood glucose and lipid indicators and PUFA.

|                                         | 11D3          |              | 11D5          |                  | CMPF         |              |
|-----------------------------------------|---------------|--------------|---------------|------------------|--------------|--------------|
|                                         | r             | p            | r             | p                | r            | p            |
| Erysipelotrichaceae.                    | -0.024        | 0.797        | -0.131        | 0.164            | -0.026       | 0.781        |
| Turicibacter                            | 0.089         | 0.164        | 0.006         | 0.946            | 0.021        | 0.824        |
| TNF- $\alpha$                           | 0.143         | 0.129        | 0.122         | 0.196            | -0.092       | 0.329        |
| IL-1 $\beta$                            | -0.138        | 0.144        | 0.116         | 0.220            | 0.075        | 0.428        |
| HbA1c                                   | 0.051         | 0.587        | 0.059         | 0.530            | 0.145        | 0.125        |
| Glucose                                 | -0.028        | 0.766        | 0.024         | 0.800            | <b>0.222</b> | <b>0.018</b> |
| Fasting insulin                         | 0.032         | 0.733        | -0.031        | 0.745            | 0.074        | 0.434        |
| HOMA-IR                                 | -0.024        | 0.797        | 0.008         | 0.933            | 0.137        | 0.146        |
| Triglyceride                            | 0.072         | 0.443        | 0.067         | 0.476            | -0.095       | 0.313        |
| Total cholesterol                       | -0.105        | 0.265        | -0.022        | 0.816            | 0.103        | 0.276        |
| High-density lipoprotein<br>cholesterol | 0.023         | 0.810        | -0.030        | 0.753            | 0.073        | 0.440        |
| Low-density lipoprotein<br>cholesterol  | -0.119        | 0.206        | -0.063        | 0.504            | 0.173        | 0.065        |
| C18:2n-6                                | -0.079        | 0.404        | -0.145        | 0.124            | 0.039        | 0.679        |
| C20:4n-6                                | <b>-0.249</b> | <b>0.008</b> | <b>-0.323</b> | <b>&lt;0.001</b> | -0.030       | 0.755        |
| C20:5n-3                                | 0.028         | 0.765        | 0.092         | 0.331            | 0.134        | 0.155        |
| C22:5n-3                                | 0.047         | 0.623        | -0.041        | 0.668            | -0.011       | 0.910        |
| C22:6n-3                                | -0.095        | 0.313        | -0.149        | 0.114            | 0.052        | 0.582        |
| Total n-3 PUFA                          | -0.082        | 0.388        | -0.097        | 0.403            | 0.031        | 0.744        |
| Total n-6 PUFA                          | <b>-0.216</b> | <b>0.021</b> | <b>-0.342</b> | <b>&lt;0.001</b> | -0.013       | 0.895        |

**Table S6** Log<sub>2</sub> Fold Changes in Individual Family.

|                                      | BMLE                |        |       | FO                  |        |       | CO                  |        |       |
|--------------------------------------|---------------------|--------|-------|---------------------|--------|-------|---------------------|--------|-------|
|                                      | Log <sub>2</sub> FC | P      | p-FDR | Log <sub>2</sub> FC | P      | p-FDR | Log <sub>2</sub> FC | P      | p-FDR |
| Methylophilaceae                     | -4.493              | <0.001 | 0.000 | -3.361              | <0.001 | 0.000 | -9.040              | <0.001 | 0.000 |
| Nitrospiraceae                       | -6.967              | <0.001 | 0.000 | -7.691              | <0.001 | 0.000 | -5.064              | <0.001 | 0.005 |
| Aeromonadaceae                       | -2.860              | 0.001  | 0.015 | -3.721              | 0.001  | 0.015 | -2.453              | 0.003  | 0.035 |
| Selenomonadaceae                     | 0.380               | 0.001  | 0.015 | -2.188              | 0.001  | 0.009 | -1.926              | 0.009  | 0.084 |
| Coriobacteriales_Incertae_Sedis      | -1.663              | 0.001  | 0.015 | -2.081              | 0.002  | 0.020 | -1.295              | 0.016  | 0.136 |
| unclassified_Clostridia_UCG_014      | -1.546              | 0.002  | 0.020 | -0.785              | 0.034  | 0.128 | 0.564               | 0.291  | 0.572 |
| unclassified_Bacteroidia             | -2.468              | 0.002  | 0.021 | -1.940              | 0.474  | 0.483 | 1.992               | 0.262  | 0.576 |
| uncultured_Ruminococcaceae_bacterium | -1.348              | 0.003  | 0.029 | -2.024              | 0.376  | 0.436 | -1.196              | 0.151  | 0.535 |
| Erysipelotrichaceae                  | -0.428              | 0.004  | 0.031 | -1.187              | 0.361  | 0.432 | -0.160              | 0.152  | 0.506 |
| Bifidobacteriaceae                   | -0.466              | 0.012  | 0.067 | -1.414              | 0.002  | 0.018 | -0.777              | 0.032  | 0.248 |
| Propionibacteriaceae                 | 0.603               | 0.046  | 0.212 | 1.339               | 0.002  | 0.020 | 0.501               | 0.263  | 0.567 |
| Akkermansiaceae                      | 0.070               | 0.082  | 0.245 | -1.347              | 0.005  | 0.046 | 0.034               | 0.271  | 0.563 |
| Helicobacteraceae                    | 1.359               | 0.194  | 0.374 | 0.440               | 0.007  | 0.052 | 6.046               | <0.001 | 0.003 |
| Lentimicrobiaceae                    | -0.140              | 0.012  | 0.071 | 1.228               | 0.282  | 0.373 | 2.123               | 0.001  | 0.012 |

\*Red mark means P < 0.05.

**Table S7** Log2 Fold Changes in Individual Genus.

|                                                  | BMLE                |        |        | FO                  |        |        | CO                  |        |        |
|--------------------------------------------------|---------------------|--------|--------|---------------------|--------|--------|---------------------|--------|--------|
|                                                  | Log <sub>2</sub> FC | P      | p-FDR  | Log <sub>2</sub> FC | P      | p-FDR  | Log <sub>2</sub> FC | P      | p-FDR  |
| Methylophilus                                    | -4.493              | <0.001 | <0.001 | -3.361              | <0.001 | <0.001 | -3.204              | <0.001 | <0.001 |
| Nitrospira                                       | -6.967              | <0.001 | <0.001 | -7.691              | <0.001 | <0.001 | -5.064              | <0.001 | <0.001 |
| Megamonas                                        | 0.380               | 0.001  | 0.028  | -2.188              | 0.001  | 0.018  | -1.926              | 0.009  | 0.116  |
| Prevotella_7                                     | -13.212             | 0.002  | 0.032  | -7.340              | 0.001  | 0.026  | -0.190              | 0.057  | 0.382  |
| Aeromonas                                        | -2.860              | 0.001  | 0.030  | -3.721              | 0.001  | 0.024  | -2.453              | 0.003  | 0.060  |
| Turicibacter                                     | -2.643              | 0.001  | 0.030  | -2.531              | 0.024  | 0.130  | -0.583              | 0.036  | 0.292  |
| uncultured_Porphyrromonadaceae_b<br>acterium     | 0.737               | 0.001  | 0.028  | 3.317               | 0.001  | 0.029  | -3.467              | 0.001  | 0.020  |
| unclassified_Coriobacteriales_Incer<br>tae_Sedis | -1.663              | 0.001  | 0.029  | -2.081              | 0.002  | 0.033  | -1.295              | 0.016  | 0.163  |
| unclassified_Clostridia_UCG_014                  | -1.546              | 0.002  | 0.033  | -0.785              | 0.034  | 0.131  | 0.564               | 0.291  | 0.534  |
| unclassified_Bacteroidia                         | -2.468              | 0.002  | 0.035  | -1.940              | 0.474  | 0.486  | 1.992               | 0.262  | 0.561  |
| unclassified_Christensenellaceae                 | -1.535              | 0.003  | 0.042  | -3.022              | 0.001  | 0.024  | 0.759               | 0.263  | 0.554  |
| uncultured_Ruminococcaceae_bact<br>erium         | -1.348              | 0.003  | 0.047  | -2.024              | 0.376  | 0.433  | -1.196              | 0.151  | 0.482  |
| unclassified_Desulfovibrionaceae                 | -0.348              | 0.004  | 0.051  | -1.249              | 0.001  | 0.023  | -0.305              | 0.008  | 0.119  |
| Propionibacterium                                | 0.603               | 0.046  | 0.260  | 1.339               | 0.002  | 0.029  | 0.501               | 0.263  | 0.550  |
| Hungatella                                       | -3.943              | 0.054  | 0.275  | -5.401              | 0.003  | 0.038  | -0.897              | 0.117  | 0.421  |
| Intestinibacter                                  | -0.776              | 0.004  | 0.052  | -1.299              | 0.002  | 0.039  | -1.656              | 0.016  | 0.167  |
| Clostridium_sensu_stricto_12                     | 0.562               | 0.034  | 0.213  | 1.269               | 0.003  | 0.047  | 0.187               | 0.365  | 0.516  |
| Helicobacter                                     | 1.359               | 0.194  | 0.389  | 0.440               | 0.007  | 0.077  | 0.500               | 0.000  | 0.006  |
| Lentimicrobium                                   | -0.140              | 0.012  | 0.098  | 1.228               | 0.282  | 0.353  | -0.370              | 0.001  | 0.023  |
| Megasphaera                                      | 0.880               | 0.021  | 0.151  | -1.416              | 0.063  | 0.175  | -0.136              | 0.001  | 0.031  |

\*Red mark means P &lt; 0.05.

**Table S8** Correlations between changes in inflammatory factor, blood glucose and lipid indicators and changes in abundance of Erysipelotrichaceae.

|                                      | BMLE   |       | FO     |       | CO     |       |
|--------------------------------------|--------|-------|--------|-------|--------|-------|
|                                      | r      | P     | r      | P     | r      | P     |
| TNF- $\alpha$                        | 0.010  | 0.951 | -0.208 | 0.224 | 0.150  | 0.363 |
| IL-1 $\beta$                         | 0.159  | 0.335 | -0.262 | 0.123 | -0.096 | 0.560 |
| HbA1c                                | 0.024  | 0.884 | 0.040  | 0.817 | -0.125 | 0.448 |
| Glucose                              | 0.171  | 0.297 | 0.245  | 0.149 | -0.068 | 0.682 |
| Fasting insulin                      | 0.414  | 0.009 | <0.001 | 0.998 | -0.177 | 0.282 |
| HOMA-IR                              | 0.454  | 0.004 | 0.091  | 0.596 | -0.146 | 0.377 |
| Triglyceride                         | 0.313  | 0.052 | -0.138 | 0.423 | -0.009 | 0.955 |
| Total cholesterol                    | 0.046  | 0.780 | -0.003 | 0.985 | -0.170 | 0.301 |
| High-density lipoprotein cholesterol | -0.029 | 0.863 | -0.056 | 0.746 | -0.069 | 0.676 |
| Low-density lipoprotein cholesterol  | -0.070 | 0.670 | 0.069  | 0.689 | -0.230 | 0.159 |

\*Red mark means  $P < 0.05$ .



**Table S9** Correlations between changes in inflammatory factor, blood glucose and lipid indicators and changes in abundance of Turicibacter.

|                                      | BMLE   |       | FO     |       | CO     |       |
|--------------------------------------|--------|-------|--------|-------|--------|-------|
|                                      | r      | P     | r      | P     | r      | P     |
| TNF- $\alpha$                        | -0.020 | 0.902 | -0.094 | 0.584 | 0.143  | 0.385 |
| IL-1 $\beta$                         | -0.037 | 0.824 | -0.243 | 0.154 | -0.093 | 0.574 |
| HbA1c                                | -0.062 | 0.709 | <0.001 | 0.998 | -0.081 | 0.624 |
| Glucose                              | 0.165  | 0.315 | 0.261  | 0.124 | 0.117  | 0.476 |
| Fasting insulin                      | 0.420  | 0.008 | -0.285 | 0.063 | -0.012 | 0.942 |
| HOMA-IR                              | 0.431  | 0.006 | -0.040 | 0.816 | -0.004 | 0.981 |
| Triglyceride                         | 0.393  | 0.013 | 0.144  | 0.403 | -0.034 | 0.837 |
| Total cholesterol                    | 0.358  | 0.025 | -0.135 | 0.432 | 0.160  | 0.331 |
| High-density lipoprotein cholesterol | 0.185  | 0.260 | -0.105 | 0.541 | 0.169  | 0.305 |
| Low-density lipoprotein cholesterol  | 0.170  | 0.301 | -0.169 | 0.325 | 0.078  | 0.637 |

\*Red mark means  $P < 0.05$ .

**Table S10** Correlation between changes of PUFA in erythrocyte phospholipids and changes of abundance of Erysipelotrichaceae.

|                | BMLE   |       | FO     |       | CO     |       | All    |       |
|----------------|--------|-------|--------|-------|--------|-------|--------|-------|
|                | r      | p     | r      | p     | r      | p     | r      | p     |
| C18:2n-6       | -0.202 | 0.217 | 0.208  | 0.224 | -0.128 | 0.439 | -0.024 | 0.803 |
| C20:4n-6       | 0.243  | 0.137 | 0.044  | 0.799 | 0.032  | 0.847 | 0.092  | 0.332 |
| C20:5n-3       | 0.215  | 0.188 | 0.145  | 0.398 | 0.263  | 0.106 | 0.172  | 0.068 |
| C22:5n-3       | 0.120  | 0.467 | -0.192 | 0.261 | 0.089  | 0.590 | 0.009  | 0.927 |
| C22:6n-3       | 0.386  | 0.015 | 0.160  | 0.351 | 0.149  | 0.365 | 0.191  | 0.042 |
| Total PUFA     | 0.371  | 0.020 | 0.118  | 0.492 | 0.035  | 0.832 | 0.145  | 0.124 |
| Total n-3 PUFA | 0.446  | 0.004 | 0.050  | 0.771 | 0.225  | 0.168 | 0.221  | 0.018 |
| Total n-6 PUFA | 0.126  | 0.444 | 0.165  | 0.337 | -0.141 | 0.391 | 0.043  | 0.652 |

\*Red mark means  $P < 0.05$ .

**Table S11** Correlation between changes of PUFA in erythrocyte phospholipids and changes of abundance of Turicibacter.

|                | BMLE   |       | FO     |       | CO     |       | All    |       |
|----------------|--------|-------|--------|-------|--------|-------|--------|-------|
|                | r      | p     | r      | p     | r      | p     | r      | p     |
| C18:2n-6       | -0.342 | 0.033 | 0.191  | 0.263 | 0.044  | 0.792 | -0.045 | 0.637 |
| C20:4n-6       | 0.210  | 0.199 | -0.021 | 0.905 | 0.161  | 0.328 | 0.103  | 0.277 |
| C20:5n-3       | 0.277  | 0.087 | 0.350  | 0.036 | 0.267  | 0.100 | 0.250  | 0.007 |
| C22:5n-3       | 0.136  | 0.409 | -0.024 | 0.887 | 0.050  | 0.761 | 0.051  | 0.591 |
| C22:6n-3       | 0.142  | 0.387 | 0.166  | 0.333 | 0.185  | 0.259 | 0.120  | 0.202 |
| C24:1          | -0.142 | 0.387 | -0.049 | 0.779 | -0.093 | 0.572 | -0.089 | 0.346 |
| Total PUFA     | -0.305 | 0.059 | 0.140  | 0.416 | 0.245  | 0.133 | 0.178  | 0.058 |
| Total n-3 PUFA | 0.338  | 0.035 | 0.164  | 0.340 | 0.232  | 0.155 | 0.205  | 0.029 |
| Total n-6 PUFA | 0.075  | 0.648 | 0.138  | 0.421 | 0.223  | 0.172 | 0.108  | 0.255 |

\*Red mark means  $P < 0.05$ .

**Figure S1** The MS spectrum of 11D3-AMMP. BMLE (A) and Serum (B)

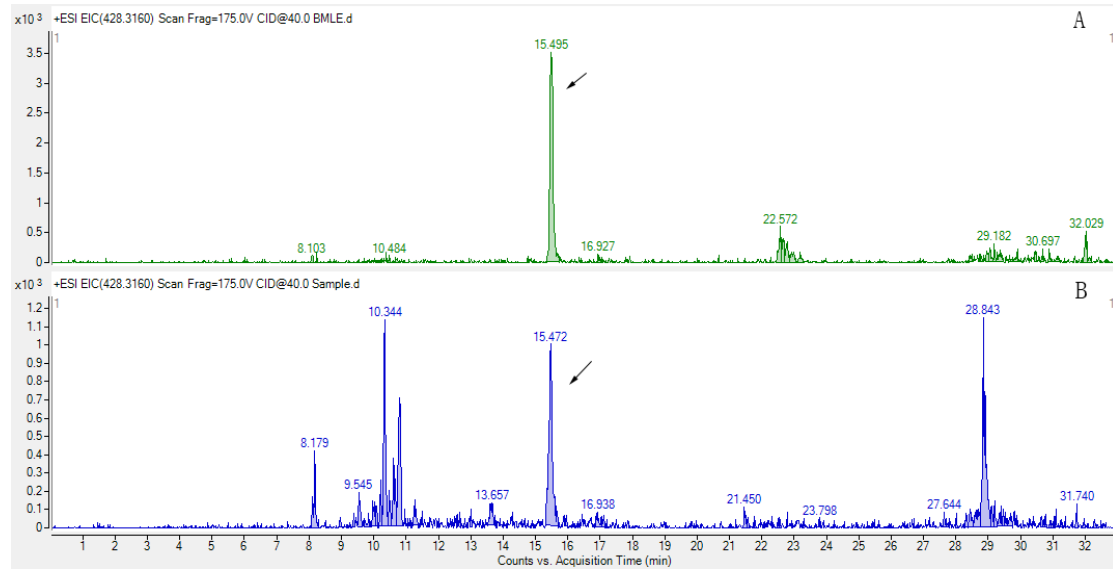

**Figure S2** The MS/MS spectrum of 11D3-AMMP. BMLE(A) and Serum (B).

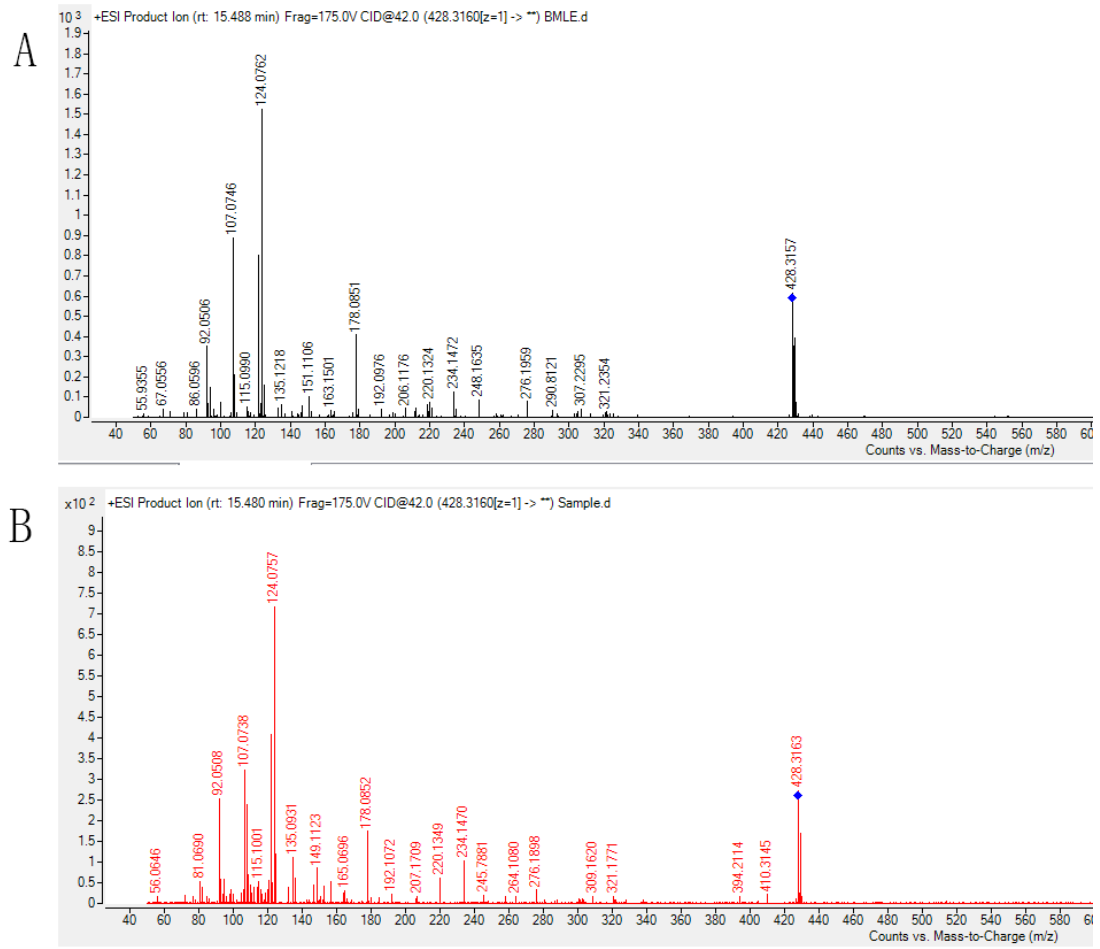

**Figure S3** The MS spectrum of 11D5-AMMP. BMLE (A) and Serum (B)

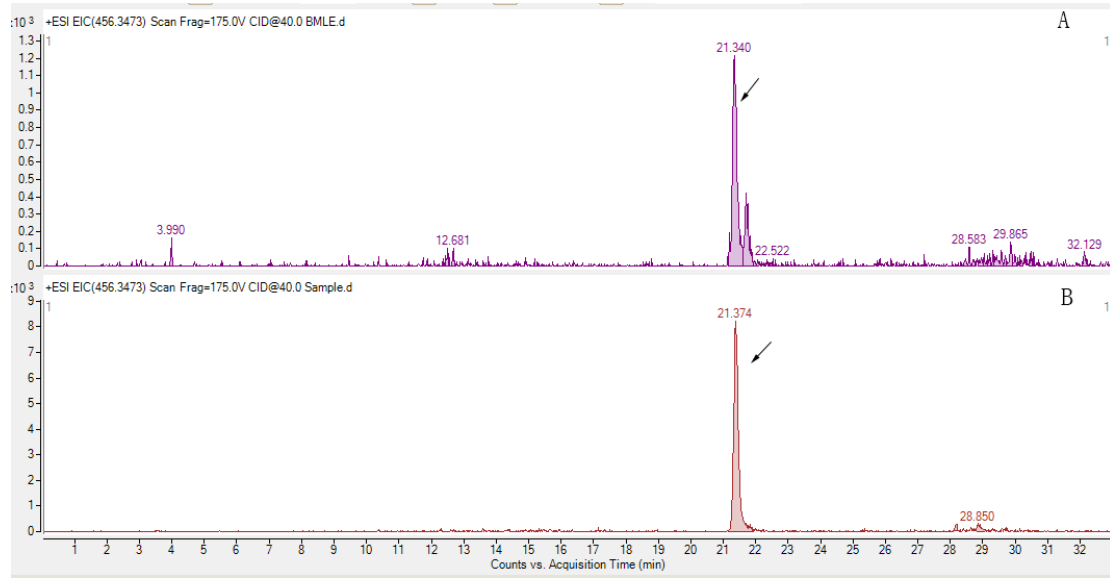

**Figure S4** The MS/MS spectrum of 11D5-AMMP. BMLE(A) and Serum (B).

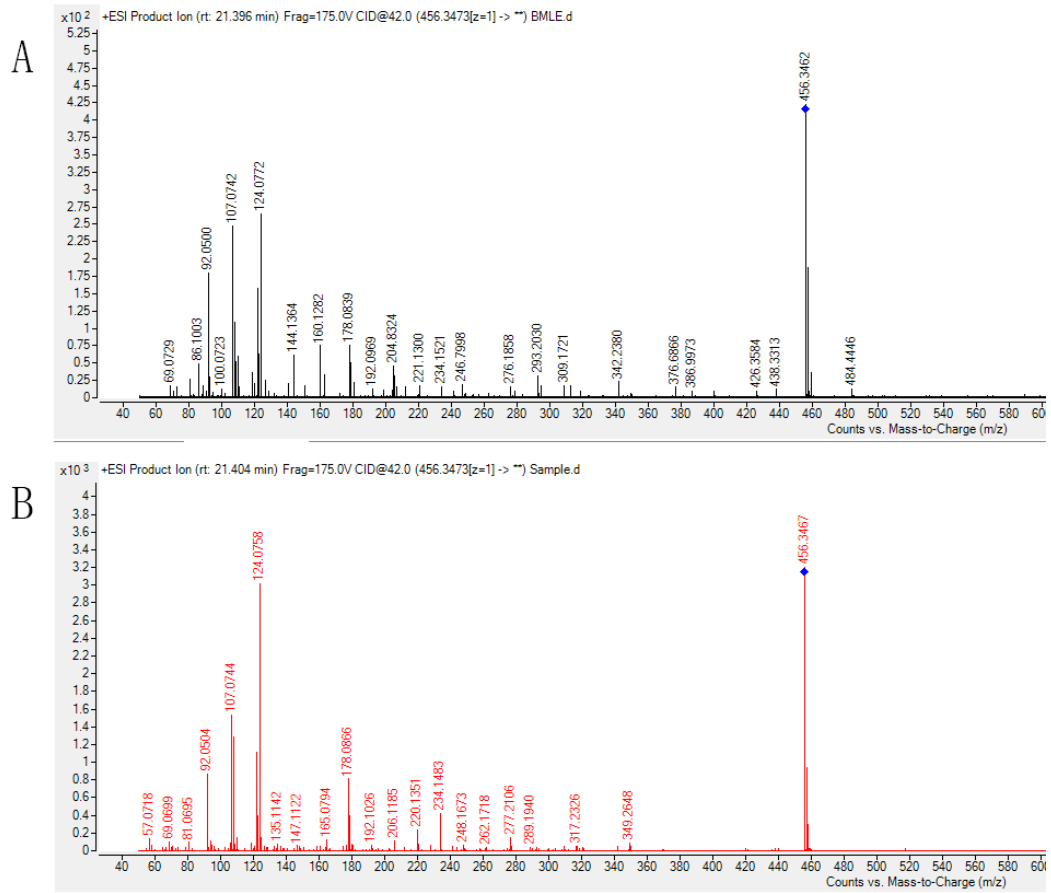

**Figure S5** The MS spectrum of CMPF. Serum (A) and Standard (B)

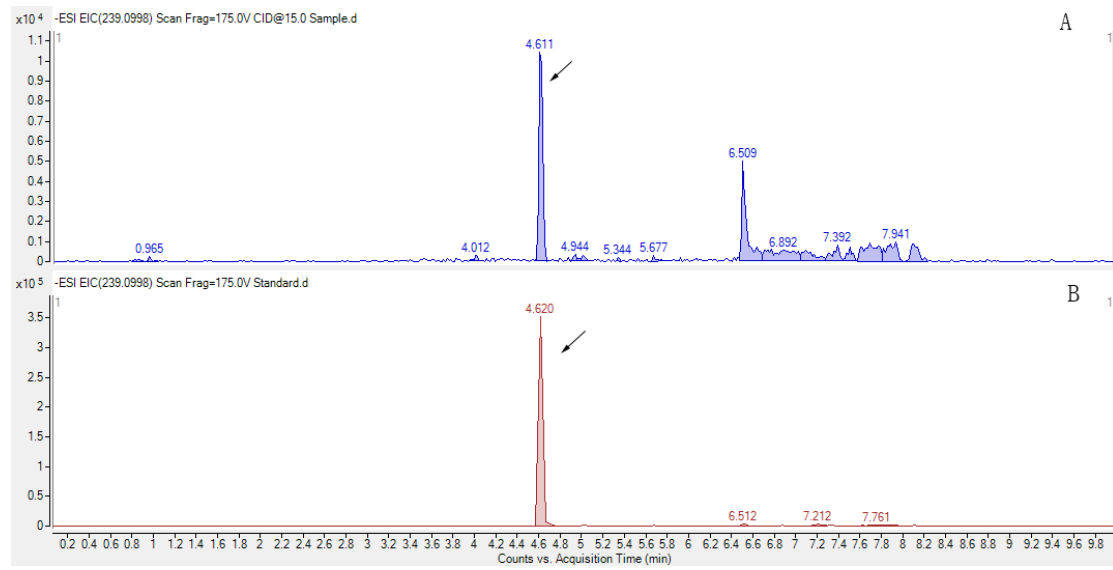



**Figure S6** The MS/MS spectrum of CMPF. Standard(A) and Serum (B).

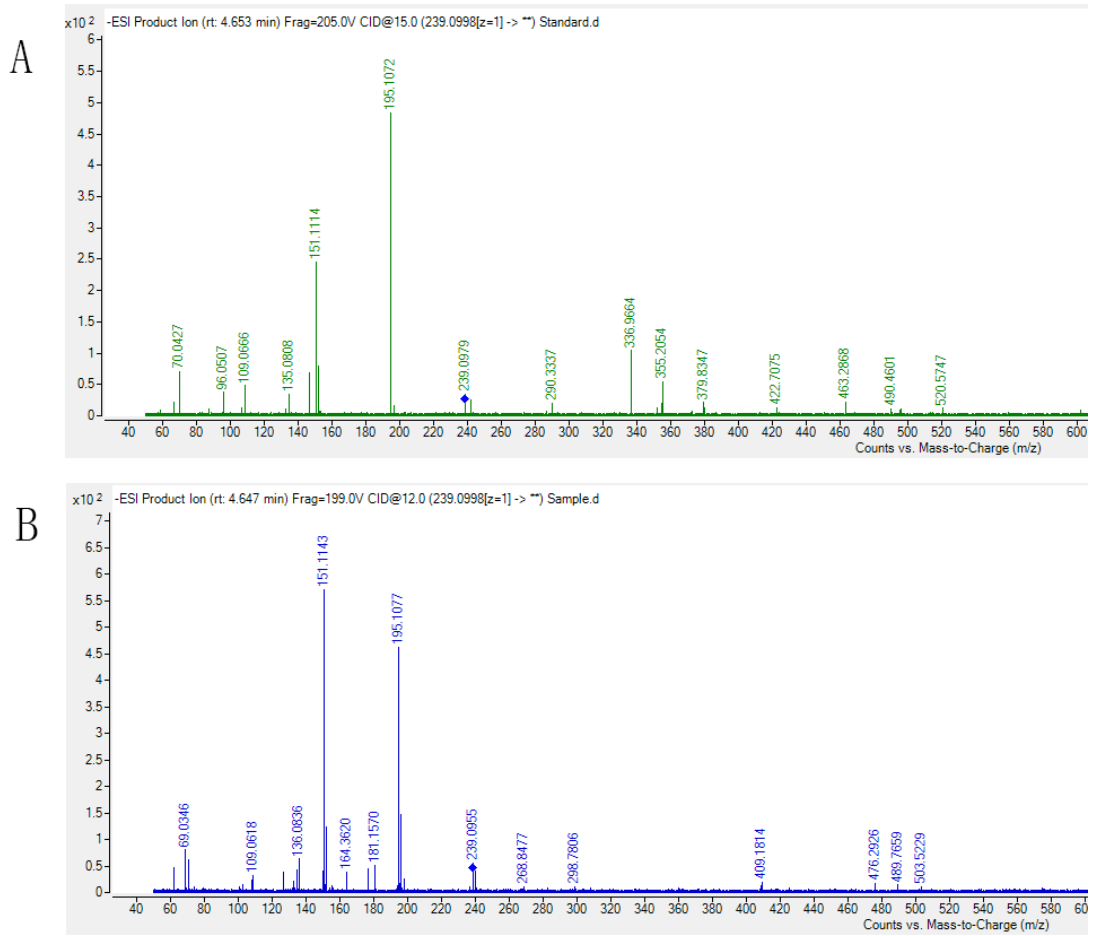

**Figure S7** HPLC spectrum of astaxanthin. Standard (A) and BMLE (B)

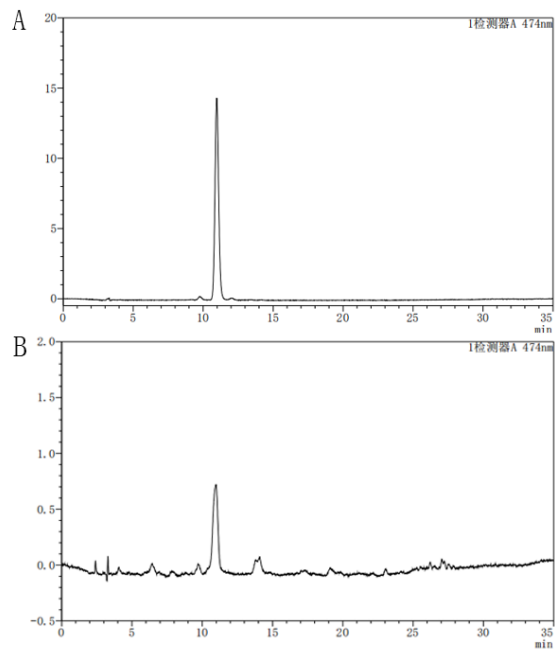

**Figure S8** Sensitivity analysis of the correlations between changes in relative abundance of Erysipelotrichaceae and glycemic traits and blood lipids. (A) HOMA-IR. (B) Insulin. (C) TC. (D) TG. (E) Glucose. (F) HbA1c. (G) HDL-C. (H) LDL-C.

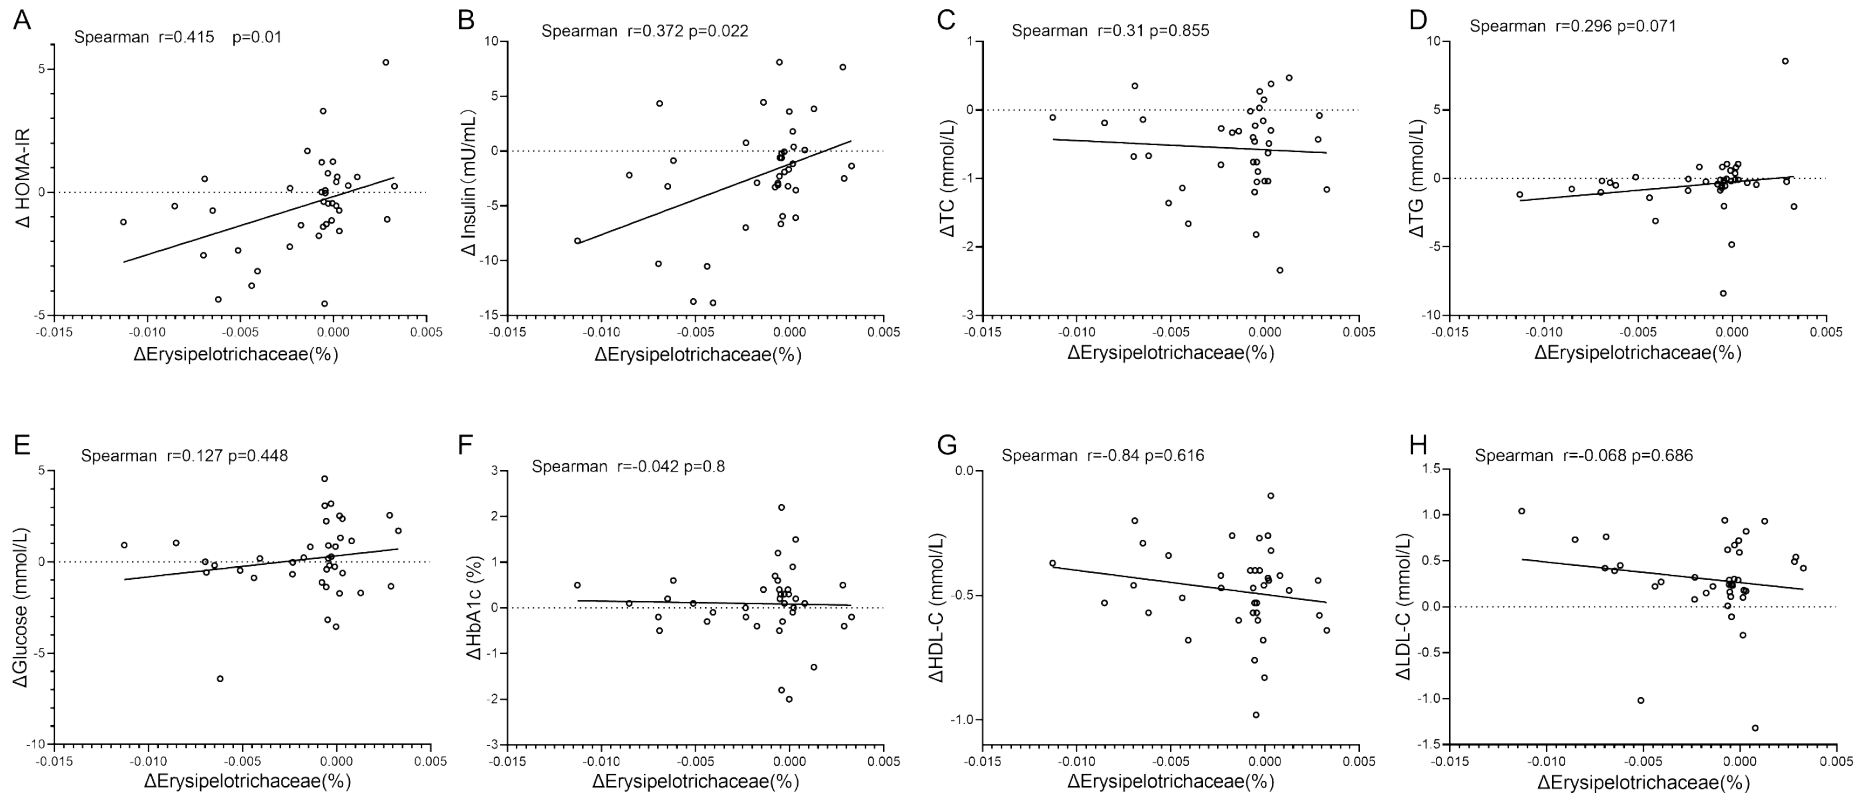

Supplement: d3fo01491f2.pdf [file d3fo01491f2.pdf]
