# Supplementary material for: Effects of lipid extract from blue mussel (Mytilus edulis) on gut microbiota, and its relationship with glycemic traits in type 2 diabetes mellitus patients: a double-blind randomized controlled trial
Source: Royal Society of Chemistry journal article supplement (doi:10.1039/d3fo01491f), 2023-01-01
Supplement: d3fo01491f1.xlsx [file d3fo01491f1.xlsx]

## Sheet: Phylum
Phylum	JC100	JC107	JC108	JC118	JC119	JC120	JC132	JC135	JC140	JC141	JC145	JC149	JC151	JC16	JC162	JC19	JC2	JC23	JC25	JC30	JC31	JC35	JC40	JC42	JC43	JC45	JC47	JC54	JC61	JC64	JC69	JC70	JC75	JC76	JC81	JC83	JC89	JC9	JC93	JF1	JF109	JF112	JF116	JF122	JF128	JF129	JF138	JF139	JF14
Actinobacteriota	0.0346844	0.0201735	0.0112281	0.0085452	0.0189779	0.0136587	0.00208318	0.0392672	0.00332973	0.0213569	0.00225816	0.00191279	0.0366938	0.0651897	0.00846159	0.0672228	0.0645539	0.00634902	0.0570652	0.0649907	0.0338714	0.0168896	0.00478462	0.00623121	0.0071444	0.0571502	0.0157261	0.002018	0.0620387	0.019121	0.0379991	0.0492562	0.0821577	0.0640848	0.064102	0.0572275	0.0274046	0.113836	0.0456692	0.00133422	0.0486061	0.0377422	0.0657036	0.0290543	0.0901168	0.00227677	0.00663484	0.00225202	0.0256986
Bacteroidota	0.179797	0.216866	0.103192	0.329758	0.00839537	0.302766	0.243237	0.29074	0.313809	0.21915	0.29962	0.23128	0.253468	0.0187868	0.242737	0.0182917	0.0153298	0.23257	0.0734084	0.018372	0.133886	0.262111	0.281015	0.338972	0.29403	0.134022	0.0671568	0.300791	0.0272661	0.137575	0.0429124	0.0769842	0.125216	0.0385611	0.0181442	0.109119	0.149299	0.268155	0.250673	0.311922	0.133597	0.170131	0.0166149	0.0208273	0.108896	0.390488	0.274682	0.327583	0.183327
Campylobacterota	0	5.42299e-05	0.000280704	1.40778e-05	4.07542e-05	1.4213e-05	8.99213e-05	0.000175039	5.61979e-05	4.20687e-05	2.80517e-05	0.000181506	0.000152142	0	0.000214761	0	0	0.000267015	0	1.67935e-05	4.0662e-05	0	4.0778e-05	5.46597e-05	2.70621e-05	1.50435e-05	2.88288e-05	5.45405e-05	0	4.09735e-05	2.87327e-05	1.55775e-05	9.20844e-05	5.00793e-05	0	6.73265e-05	1.48615e-05	5.32318e-05	0	0.0105376	1.54109e-05	6.13695e-05	0	1.44333e-05	7.71218e-05	0.000146888	5.76942e-05	0.000129924	0
Chloroflexi	3.10236e-05	4.06725e-05	0	1.40778e-05	0	0	0	0	0	0	0	0	0	0	1.43174e-05	0	0	0	3.02092e-05	0	0	0	0	0	4.05932e-05	1.50435e-05	7.20721e-05	0	3.15398e-05	0	4.30991e-05	0	0.00209952	3.33862e-05	3.18598e-05	0.00104356	1.48615e-05	1.3308e-05	0.00069724	0	0.00016952	0.000629037	0	2.88667e-05	0.00229437	0	0	1.44361e-05	0
Cyanobacteria	0.000620472	0.000122017	0.000534674	1.40778e-05	0.000665652	0.000255834	0.000269764	0.000116693	0.000407435	0.00646455	0.000448827	0.000167544	0.000207466	0.00109247	0.000429523	0.00208532	0.00218506	0.000281849	0.000891171	0.00191445	0.000189756	0.000373091	9.51488e-05	0.000177644	0.0010013	0.000676956	0.000158559	2.72702e-05	0.00165584	0.000150236	0.000675219	0.00123063	0.0011971	0.00185293	0.0012266	0.000538612	0.000549875	1.3308e-05	0.00052293	5.44581e-05	0.0009863	0.00113534	0.00212	0.000606201	0.00121467	0.000235021	0.000216353	0.000101052	0.000182359
Desulfobacterota	0.00127197	0.000135575	0.00268673	0.00858744	0.000108678	0.000213195	0.000209816	0.00786219	0.0028099	0.000869419	0.000659214	0.000153582	0.00091285	5.37278e-05	0.000587014	4.92595e-05	5.16156e-05	0.000563698	1.51046e-05	5.03804e-05	9.48779e-05	0.00087533	0.000734005	0.00875922	0.000297683	0.000120348	0.00151351	0.00515408	0.000126159	0.000259499	0.000129297	0.00144871	0.000791926	0.000150238	3.18598e-05	0.000353464	0.000728213	7.98478e-05	0.000871549	0.00235531	6.16437e-05	0.000245478	3.28682e-05	0.0001299	0.00040489	0.00145419	0.00178852	0.00062075	0.000729436
Firmicutes	0.620395	0.727237	0.591456	0.640215	0.330245	0.607024	0.516523	0.640571	0.503238	0.335932	0.399792	0.502813	0.631001	0.677669	0.677271	0.658763	0.644283	0.602341	0.675236	0.653501	0.798913	0.581736	0.670269	0.588685	0.636677	0.597993	0.842998	0.475784	0.688056	0.808039	0.524904	0.659662	0.630189	0.635974	0.653572	0.723372	0.706917	0.549672	0.537904	0.249922	0.621692	0.648491	0.654012	0.818501	0.610998	0.578754	0.673148	0.632718	0.464538
Fusobacteriota	0	2.7115e-05	2.67337e-05	0	0	8.52781e-05	4.49607e-05	0	2.8099e-05	4.20687e-05	0	1.3962e-05	0	0	1.43174e-05	1.64198e-05	1.72052e-05	2.96683e-05	1.51046e-05	0	0.000487944	1.43497e-05	0	1.36649e-05	0	0	2.88288e-05	2.72702e-05	1.57699e-05	1.36578e-05	1.43664e-05	1.55775e-05	0.00029467	1.66931e-05	4.77897e-05	3.36632e-05	0	0	3.16927e-05	0.00325387	3.08219e-05	0.000122739	0	0	0.000192805	0	1.44236e-05	1.44361e-05	0
Nitrospirota	6.20472e-05	0	1.33668e-05	0	0	2.8426e-05	1.49869e-05	1.45866e-05	0	0	0	0	0	1.79093e-05	0	1.64198e-05	0	0	0	0	0	1.43497e-05	0	2.73299e-05	0	3.0087e-05	7.20721e-05	4.09054e-05	1.57699e-05	0	2.87327e-05	0	0.00125235	3.33862e-05	0	0.000858412	5.9446e-05	0	0.000602161	1.36145e-05	3.08219e-05	0.00026082	0	7.21667e-05	0.00156172	0	0	0	1.40276e-05
Patescibacteria	0	0.000135575	0.000160402	7.03888e-05	0.000393958	5.68521e-05	0	0.000102106	2.8099e-05	2.80458e-05	0.000392723	4.1886e-05	1.38311e-05	0	0.000100222	0	0	0.000103839	0	0	0.000718362	5.73987e-05	1.35927e-05	8.19896e-05	0.000108249	1.50435e-05	5.76577e-05	0.000422689	1.57699e-05	9.56049e-05	0.00015803	7.78877e-05	0.000110501	6.67724e-05	0	1.68316e-05	5.9446e-05	0.000412547	0	2.7229e-05	3.08219e-05	6.13695e-05	0	0.000404134	0.000115683	2.93776e-05	0.000187506	4.33082e-05	1.40276e-05
Proteobacteria	0.143112	0.0334328	0.288951	0.00498353	0.634013	0.0702976	0.237018	0.0208443	0.175576	0.386821	0.296226	0.263184	0.0542454	0.217257	0.0204596	0.220042	0.234902	0.154883	0.169625	0.225738	0.0301034	0.130625	0.0354633	0.0403252	0.0589278	0.187607	0.066955	0.215435	0.191983	0.0343358	0.377692	0.180513	0.138919	0.229163	0.222095	0.0924056	0.10296	0.0675512	0.155057	0.419205	0.172156	0.126759	0.227284	0.11616	0.163556	0.025397	0.0412225	0.0242237	0.319984
Synergistota	0	0	0.000441106	1.40778e-05	0.000122263	0	4.49607e-05	0	8.42969e-05	4.20687e-05	5.61033e-05	1.3962e-05	0	0.000537278	2.86348e-05	0.000509014	0.000808644	1.48342e-05	1.51046e-05	0.00048701	4.0662e-05	0.000330042	0	0.00243236	0	3.0087e-05	0.000158559	0	0	1.36578e-05	2.87327e-05	0	1.84169e-05	0.000767882	3.18598e-05	0	0.000535014	0	0	0.000762413	0	0	0.000493024	0	0	0.000528797	0	2.88721e-05	0
Thermotogota	0.000108583	5.42299e-05	0	0	0.000203771	4.26391e-05	0	0	0	0	0	0	0	0.000465641	0	0.00146136	0.00115275	5.93366e-05	0.000226569	0.00147782	0	5.73987e-05	1.35927e-05	4.09948e-05	1.35311e-05	0.000210609	1.44144e-05	1.36351e-05	0.000205009	1.36578e-05	2.87327e-05	3.11551e-05	0	0.00105167	0.000254879	5.04948e-05	7.43075e-05	0	0	0	9.24656e-05	4.60271e-05	0.000953179	4.33e-05	0	0	0	0	2.80552e-05
Verrucomicrobiota	0.000325748	0.000176247	0.000588141	0.00748937	0.000163017	0.000966486	0.000164856	0.00013128	8.42969e-05	0.000154252	0.000294543	0.00013962	0.0232224	0.000358185	0.0494237	0.000426915	0.00043013	0.000593366	0.000151046	0.000184728	6.777e-05	0.000129147	0.00732646	0.0124898	0.000230028	0.000150435	0.000158559	5.45405e-05	0.000173469	2.73157e-05	0.00156593	0.00476673	0.00154702	0.00026709	0.00834727	0.00474652	0.00112947	1.3308e-05	0.00034862	0.00042205	0.000292808	0.000552325	0.000542326	0.000202067	0.00154244	0.000528797	0.0017741	0.0119242	0.00150095
unclassified_Bacteria	0.0195914	0.00154555	0.000441106	0.000295633	0.00667011	0.00459081	0.000299738	0.000175039	0.00054793	0.0290975	0.000224413	9.7734e-05	8.29864e-05	0.0185719	0.000257714	0.0311156	0.0362857	0.00194327	0.0233215	0.0332678	0.00158582	0.0067874	0.000244668	0.00170812	0.00150195	0.0219635	0.0049009	0.000177257	0.0284173	0.00031413	0.0137917	0.0259989	0.0161148	0.0279276	0.0321147	0.0101663	0.0102544	0.000199619	0.0076221	0.000190603	0.022238	0.0137621	0.0322438	0.013957	0.0190298	0.000161577	0.000274048	0.000346465	0.00398384
[truncated: 179 more columns]

## Sheet: Order
Order	JC100	JC107	JC108	JC118	JC119	JC120	JC132	JC135	JC140	JC141	JC145	JC149	JC151	JC16	JC162	JC19	JC2	JC23	JC25	JC30	JC31	JC35	JC40	JC42	JC43	JC45	JC47	JC54	JC61	JC64	JC69	JC70	JC75	JC76	JC81	JC83	JC89	JC9	JC93	JF1	JF109	JF112	JF116	JF122	JF128	JF129	JF138	JF139	JF14
Acetobacterales	0.00834535	0.000827007	0.000441106	0.0001267	0.00331468	0.00191876	0.000209816	0.000262559	0.000295039	0.000238389	0.000350646	0.000223392	0.000235128	0.0121067	0.000486792	0.0147286	0.0147793	0.000904883	0.00983309	0.0134516	0.00081324	0.00322868	0.000176705	0.000888221	0.000541243	0.0103048	0.00191712	5.45405e-05	0.0114962	5.46314e-05	0.006666	0.00968923	0.00644591	0.0137384	0.0137953	0.00447721	0.00494888	0.000159696	0.00321681	0.000190603	0.00966265	0.0057227	0.0137225	0.00536921	0.00730729	0.000264399	0.000158659	0.000158797	0.00192178
Acidaminococcales	0.000961732	0.000284707	0.0138347	0.000267478	0.00028528	0.000198982	0.00221806	0.000160453	0.000182643	0.0222824	0.0905788	0.0163076	0.00026279	0.000125365	0.00498246	6.56793e-05	0.000154847	0.000815878	4.53138e-05	0.000235108	0.000108432	0.00182241	0.000475744	0.020716	0.000514181	0.0032193	0.00105225	0.0122716	0.000662335	0.000136578	0.000129297	0.00423709	0.00169435	0.000400634	0.0010673	0.00621087	0.000386399	0.00385931	0.0160365	0.000599039	6.16437e-05	0.000767118	0.000147907	0.00262687	0.00942814	0.0128527	0.0154188	0.00531247	0.014238
Actinomycetales	3.10236e-05	8.13449e-05	0.000200503	0	0.00025811	0.00014213	1.49869e-05	0.000102106	0.000210742	0	0.000294543	0	0.000414932	1.79093e-05	0.000214761	0	0	5.93366e-05	0	0	0.00033885	2.86993e-05	0.000108741	4.09948e-05	4.05932e-05	0	4.32432e-05	0.000204527	0	0.00019121	0.000100565	0	9.20844e-05	3.33862e-05	1.59299e-05	5.04948e-05	2.9723e-05	0.000226235	3.16927e-05	0.000340363	6.16437e-05	4.60271e-05	0	0.000115467	7.71218e-05	5.87553e-05	8.65414e-05	2.88721e-05	8.41656e-05
Anaerolineales	3.10236e-05	4.06725e-05	0	1.40778e-05	0	0	0	0	0	0	0	0	0	0	1.43174e-05	0	0	0	3.02092e-05	0	0	0	0	0	4.05932e-05	1.50435e-05	7.20721e-05	0	3.15398e-05	0	4.30991e-05	0	0.00209952	3.33862e-05	3.18598e-05	0.00104356	1.48615e-05	1.3308e-05	0.00069724	0	0.00016952	0.000629037	0	2.88667e-05	0.00229437	0	0	1.44361e-05	0
Bacillales	0.0309771	0.00509761	0.00413035	0.000549033	0.0199152	0.011541	0.00101911	0.000758504	0.0013347	0.00121999	0.0025527	0.00104715	0.00134161	0.0426062	0.00207603	0.0509179	0.0470906	0.00445025	0.0398912	0.0490705	0.00294122	0.0162008	0.000924302	0.00621755	0.00290918	0.0414749	0.00712072	0.000763567	0.0428783	0.000833128	0.0373238	0.0380559	0.0193561	0.0406978	0.0464357	0.012994	0.0207912	0.000319391	0.0107121	0.00027229	0.0358612	0.0200832	0.0496639	0.0243202	0.0204373	0.000984151	0.000591366	0.000692931	0.00822018
Bacteroidales	0.175919	0.216445	0.103112	0.328491	0.00661577	0.301899	0.243162	0.290697	0.313781	0.219037	0.29955	0.231266	0.253454	0.0157243	0.242666	0.00893238	0.00634871	0.23211	0.0682728	0.00905167	0.133466	0.260504	0.280961	0.338098	0.293841	0.128125	0.0657586	0.300736	0.0210843	0.137521	0.0391627	0.0714386	0.122435	0.0299975	0.00979689	0.10752	0.147099	0.268115	0.249754	0.311909	0.12865	0.167308	0.00701737	0.017753	0.106293	0.390399	0.274625	0.327554	0.182373
Bifidobacteriales	0.00187693	0.010968	0.00733839	0.00678548	0.000665652	0.00103755	0.000164856	0.0375459	0.00081487	0.0205996	0.0012483	0.000753948	0.035449	0.00111037	0.00150333	0.000410496	0.000172052	0.00078621	0.00901745	0.000268695	0.0292089	0.00106188	0.00266417	0.000519268	0.00461409	0.00941722	0.00699099	0.000286338	0.0122374	0.0119233	0.00258595	0.00104369	0.056061	0.000734496	0.000844285	0.0406315	0.00105517	0.112865	0.025164	0.00042205	0.00248116	0.0145906	6.57365e-05	0.0023815	0.0615046	0.000660997	0.000230777	0.000259849	0.017282
Burkholderiales	0.00541362	0.00268438	0.0208924	0.00122477	0.00214639	0.00569942	0.00140877	0.00453644	0.0176461	0.0113445	0.0438027	0.00237354	0.00257258	0.00479968	0.000901997	0.00912942	0.0079488	0.00216579	0.00720489	0.00841352	0.001884	0.00344392	0.0124237	0.00213173	0.0233817	0.00731113	0.00193153	0.0248159	0.00859459	0.00172089	0.00497076	0.00898824	0.0085086	0.00819631	0.00829948	0.00629502	0.00358162	0.000199619	0.00605331	0.00556834	0.006488	0.00707283	0.00854574	0.00499394	0.0104693	0.0163046	0.00191833	0.01331	0.00164123
Campylobacterales	0	5.42299e-05	0.000280704	1.40778e-05	4.07542e-05	1.4213e-05	8.99213e-05	0.000175039	5.61979e-05	4.20687e-05	2.80517e-05	0.000181506	0.000152142	0	0.000214761	0	0	0.000267015	0	1.67935e-05	4.0662e-05	0	4.0778e-05	5.46597e-05	2.70621e-05	1.50435e-05	2.88288e-05	5.45405e-05	0	4.09735e-05	2.87327e-05	1.55775e-05	9.20844e-05	5.00793e-05	0	6.73265e-05	1.48615e-05	5.32318e-05	0	0.0105376	1.54109e-05	6.13695e-05	0	1.44333e-05	7.71218e-05	0.000146888	5.76942e-05	0.000129924	0
Caulobacterales	0.000139606	2.7115e-05	6.68342e-05	1.40778e-05	5.4339e-05	2.8426e-05	0	0	1.40495e-05	0	1.40258e-05	0	0	0.000125365	0	0.000164198	0.000154847	4.45025e-05	0.000105732	0.000100761	1.3554e-05	2.86993e-05	6.79634e-05	8.19896e-05	4.05932e-05	3.0087e-05	4.32432e-05	6.81756e-05	0.000157699	5.46314e-05	8.61982e-05	0.000140198	0.000110501	0.000133545	0.000143369	0.000201979	0.000133753	3.99239e-05	4.75391e-05	0.000108916	0.000215753	0.000153424	0.000131473	0.000158767	0.000289207	1.46888e-05	0	0	4.20828e-05
Christensenellales	0.00150465	0.00639913	0.00122975	0.00340682	0.000339619	0.00727707	0.0407793	0.0140761	0.0027818	0.00019632	0.000364672	0.00901945	0.00152142	0.00592797	0.047362	6.56793e-05	5.16156e-05	0.00740224	1.51046e-05	0.000319076	0.00138251	0.00297038	0.029333	0.00534299	0.00135311	0.000556609	0.0491532	0.000286338	0.000315398	0.00646016	0.000100565	0.000373861	0.0014181	0.0004841	0.00130625	0.0205009	0.0208061	5.32318e-05	0.00217095	0.00334917	0.00329794	0.000444929	3.28682e-05	0.0121096	0.000925462	0.00408349	0.0182314	0.00129924	0.000785546
Clostridia_UCG_014	0.00578591	0.00725325	0.000828744	0.0495678	0.000339619	0.00518775	0.00713376	0.0070891	0.000351237	0.0204874	0.000210388	0.0437709	0.0147992	0.00229239	0.0211611	0.000311977	0.000189257	0.00758025	0.000120837	0.000453423	0.00777999	0.00169326	0.082059	0.00847226	0.000175904	0.000210609	0.00377658	9.54459e-05	6.30795e-05	0.0301019	0.000129297	0.0042994	0.00110501	0.000534179	0.00600558	0.0294048	0.0545714	9.31557e-05	0.000491237	0.00042205	0.00232705	0.000598352	0.000246512	0.00863114	0.000674816	0.047533	0.00506267	0.00863276	4.20828e-05
Clostridia_vadinBB60_group	0	2.7115e-05	2.67337e-05	0	0	0	2.99738e-05	0	0	0	0	2.7924e-05	1.38311e-05	0	0.000744506	0	0	0	0	0	0	0	0	0	0	0	0	0	0	0	0	0	5.52507e-05	0	0	0	1.48615e-05	0	0	0	0	0	0	0	0	0	0	0	0
Clostridiales	0.00479315	0.0056128	0.0024595	0.000999521	0.0036543	0.0130049	0.000554515	0.00503238	0.000505781	0.000294481	0.000883628	0.00145205	0.000926682	0.0058026	0.00157492	0.00845621	0.00736382	0.00078621	0.00498452	0.00779216	0.00521829	0.00192286	0.0559611	0.00102487	0.0195659	0.00673948	0.0010955	0.000163621	0.00572447	8.19471e-05	0.00446794	0.00517174	0.00248628	0.00761205	0.00659498	0.00143069	0.00361134	0.000558934	0.00367635	0.000190603	0.00490068	0.00397367	0.00737892	0.00555684	0.00289207	0.00227677	0.0171208	0.0154321	0.00105207
Coriobacteriales	0.000263701	0.00524675	0.00215206	0.000774277	0.00129055	0.00208931	0.0012589	0.00112317	0.00134875	0.000490801	0.000448827	0.000949416	0.00026279	0.000179093	0.00552652	1.64198e-05	0	0.00145375	1.51046e-05	1.67935e-05	0.00105721	0.000573987	0.00020389	0.00101121	0.000270621	0.000346	0.000936937	0.000654486	0.000189239	0.00549045	5.74655e-05	0.000373861	0.000257836	0.000367248	0.000111509	0.00146435	0.00462192	1.3308e-05	0.0084778	0.000108916	0.000631848	0.000460271	1.64341e-05	0.00340627	0.00190876	0.00127793	0.00576942	0.00171789	0.000182359
Corynebacteriales	0.00860906	0.00104393	0.000267337	0.000154855	0.00407542	0.00267205	8.99213e-05	0.000160453	4.21484e-05	2.80458e-05	2.80517e-05	4.1886e-05	2.76621e-05	0.014417	5.72697e-05	0.01752	0.0174633	0.00109773	0.012416	0.0168942	0.000664146	0.0041901	0.000163112	0.00106586	0.000568305	0.0123808	0.00183063	6.81756e-05	0.0135463	0.000122921	0.00887842	0.012649	0.00629857	0.0160588	0.0164875	0.00289504	0.00584057	0.000106464	0.00258296	0.000136145	0.010988	0.00653585	0.0172394	0.00590324	0.00651679	5.87553e-05	7.21178e-05	4.33082e-05	0.00248289
Cyanobacteriales	0.000620472	0.000122017	0.000534674	1.40778e-05	0.000665652	0.000255834	0.000269764	0.000116693	0.000407435	0.00646455	0.000448827	0.000167544	0.000207466	0.00109247	0.000429523	0.00208532	0.00218506	0.000281849	0.000891171	0.00191445	0.000189756	0.000373091	9.51488e-05	0.000177644	0.0010013	0.000676956	0.000158559	2.72702e-05	0.00165584	0.000150236	0.000675219	0.00123063	0.0011971	0.00185293	0.0012266	0.000538612	0.000549875	1.3308e-05	0.00052293	5.44581e-05	0.0009863	0.00113534	0.00212	0.000606201	0.00121467	0.000235021	0.000216353	0.000101052	0.000182359
Cytophagales	0.000248189	0	0	0	6.79237e-05	0.000170556	1.49869e-05	0	0	0	0	0	1.38311e-05	0.000214911	1.43174e-05	0.000426915	0.000378514	1.48342e-05	0.000226569	0.00038625	2.7108e-05	2.86993e-05	0	4.09948e-05	0	0.000376087	0.00012973	1.36351e-05	0.000283858	0	0.000244228	0.000451749	0.000368338	0.000367248	0.000589407	0.000117821	8.91689e-05	0	4.75391e-05	0	9.24656e-05	0.000291505	0.000295814	0.000144333	0.000385609	0	0	0	2.80552e-05
Desulfovibrionales	0.00127197	0.000135575	0.00268673	0.00858744	0.000108678	0.000213195	0.000209816	0.00786219	0.0028099	0.000869419	0.000659214	0.000153582	0.00091285	5.37278e-05	0.000587014	4.92595e-05	5.16156e-05	0.000563698	1.51046e-05	5.03804e-05	9.48779e-05	0.00087533	0.000734005	0.00875922	0.000297683	0.000120348	0.00151351	0.00515408	0.000126159	0.000259499	0.000129297	0.00144871	0.000791926	0.000150238	3.18598e-05	0.000353464	0.000728213	7.98478e-05	0.000871549	0.00235531	6.16437e-05	0.000245478	3.28682e-05	0.0001299	0.00040489	0.00145419	0.00178852	0.00062075	0.000729436
Enterobacterales	0.101897	0.0267082	0.2658	0.00287186	0.61869	0.0544075	0.23483	0.0155493	0.156919	0.36911	0.251315	0.260447	0.0509537	0.166359	0.0182977	0.149765	0.167097	0.147852	0.119704	0.157892	0.0238957	0.113635	0.0221017	0.0307734	0.0329211	0.137558	0.0542847	0.189665	0.135211	0.0319047	0.342379	0.128094	0.0800214	0.161472	0.155285	0.0534909	0.0784092	0.0666596	0.126676	0.412901	0.124073	0.0838767	0.160446	0.0857052	0.0984846	0.0081376	0.0387273	0.0104084	0.310782
Erysipelotrichales	0.0014426	0.00761931	0.00443779	0.0143593	0.0127153	0.00682225	0.00804796	0.00245055	0.00924456	0.000280458	0.00340828	0.00456557	0.0020055	0.000555187	0.00375116	0.000738892	0.000825849	0.0178158	0.00075523	0.000890053	0.00325296	0.00701699	0.00354769	0.00289697	0.00479	0.000872522	0.00797117	0.00238615	0.00129313	0.00301838	0.00255721	0.00157333	0.00112343	0.00166931	0.000860215	0.022891	0.0047854	0.00306083	0.00101417	0.0111911	0.000970889	0.000951227	0.00105178	0.0039403	0.00136891	0.00425976	0.00992341	0.00806976	0.00120637
Flavobacteriales	0.00034126	2.7115e-05	0	0	0.000271695	5.68521e-05	0	0	1.40495e-05	0	1.40258e-05	0	0	0.000268639	4.29523e-05	0.00095235	0.00089467	8.90049e-05	0.000679707	0.000604564	4.0662e-05	0.000157846	0	0	5.41243e-05	0.000752174	8.64865e-05	1.36351e-05	0.000536176	0	0.000488457	0.000763299	0.000239419	0.000817962	0.000923935	0.000168316	0.000341814	1.3308e-05	0.000126771	0	0.000523972	0.000276163	0.000723101	0.0002165	0.000134963	0	0	0	0.000140276
Fusobacteriales	0	2.7115e-05	2.67337e-05	0	0	8.52781e-05	4.49607e-05	0	2.8099e-05	4.20687e-05	0	1.3962e-05	0	0	1.43174e-05	1.64198e-05	1.72052e-05	2.96683e-05	1.51046e-05	0	0.000487944	1.43497e-05	0	1.36649e-05	0	0	2.88288e-05	2.72702e-05	1.57699e-05	1.36578e-05	1.43664e-05	1.55775e-05	0.00029467	1.66931e-05	4.77897e-05	3.36632e-05	0	0	3.16927e-05	0.00325387	3.08219e-05	0.000122739	0	0	0.000192805	0	1.44236e-05	1.44361e-05	0
Gracilibacteraceae	0	0	0	0	0.000149432	0	0	1.45866e-05	0	0	1.40258e-05	0	0	0.000411913	0	0.000623953	0.000447335	1.48342e-05	3.02092e-05	0.000419836	1.3554e-05	0	0	4.09948e-05	0	0	1.44144e-05	0	0	0	2.87327e-05	1.55775e-05	0	0.000550872	0	1.68316e-05	1.48615e-05	0	0	0	3.08219e-05	1.53424e-05	0.000542326	2.88667e-05	0	0	0	0	0
Kosmotogales	0.000108583	5.42299e-05	0	0	0.000203771	4.26391e-05	0	0	0	0	0	0	0	0.000465641	0	0.00146136	0.00115275	5.93366e-05	0.000226569	0.00147782	0	5.73987e-05	1.35927e-05	4.09948e-05	1.35311e-05	0.000210609	1.44144e-05	1.36351e-05	0.000205009	1.36578e-05	2.87327e-05	3.11551e-05	0	0.00105167	0.000254879	5.04948e-05	7.43075e-05	0	0	0	9.24656e-05	4.60271e-05	0.000953179	4.33e-05	0	0	0	0	2.80552e-05
Lachnospirales	0.0734174	0.176695	0.072622	0.153574	0.0255393	0.0848802	0.15994	0.102281	0.066721	0.114413	0.204679	0.191726	0.130054	0.0294249	0.0939938	0.00369446	0.00277004	0.171527	0.0471566	0.00448385	0.239879	0.13371	0.112792	0.181238	0.297792	0.00980835	0.158876	0.201336	0.0532391	0.237947	0.00761418	0.0649895	0.0472025	0.0250396	0.00586221	0.158268	0.0533528	0.230747	0.0739708	0.0683449	0.0359999	0.0320195	0.00221861	0.0503868	0.0391972	0.187694	0.176588	0.247882	0.0931573
Lactobacillales	0.280345	0.0465971	0.0197963	0.00678548	0.190648	0.107934	0.00395654	0.00633059	0.0277056	0.00221562	0.00726538	0.0040769	0.00517282	0.389473	0.0128284	0.410381	0.405853	0.0607014	0.340971	0.407476	0.0478863	0.153757	0.0101809	0.0567778	0.0351267	0.33914	0.100959	0.00709026	0.357535	0.0575542	0.324737	0.328234	0.381543	0.373024	0.397579	0.256043	0.199367	0.0136407	0.209758	0.0530422	0.320116	0.27492	0.409128	0.226098	0.386207	0.0036722	0.00262509	0.0042442	0.0998345
Micrococcales	0.0217631	0.00257592	0.00114955	0.000802433	0.0115334	0.00712073	0.000509554	0.000306319	0.000857018	0.000182298	0.000182336	0.00013962	0.000539412	0.0450955	0.00110244	0.0444813	0.0429958	0.00274432	0.0320822	0.0433103	0.00230418	0.00981518	0.00163112	0.00317027	0.00151548	0.0312453	0.00505946	0.000777202	0.0331483	0.00136578	0.0238194	0.0320586	0.0142178	0.0429847	0.0423258	0.00880294	0.0142224	0.000598858	0.00684562	0.000258676	0.0316695	0.0132405	0.0435669	0.0152272	0.0142868	0.000220332	0.000475978	0.000187669	0.00521827
Microtrichales	1.55118e-05	0	1.33668e-05	0	1.35847e-05	1.4213e-05	0	0	0	0	0	1.3962e-05	0	0	0	0	0	1.48342e-05	4.53138e-05	0	0	7.17484e-05	0	2.73299e-05	1.35311e-05	1.50435e-05	8.64865e-05	0	1.57699e-05	1.36578e-05	7.18319e-05	1.55775e-05	0.00158385	0	4.77897e-05	0.000875244	0	0	0.000744779	0	7.70547e-05	0.000352874	0	8.66001e-05	0.00175452	0	0	0	0
Monoglobales	4.65354e-05	0.00492137	0.00132332	0.00104175	0.000163017	0.000397965	0.00278756	0.00358831	0.00196693	0.00344963	7.01292e-05	0.00295994	0.00218531	0.000232821	0.00137447	3.28396e-05	1.72052e-05	0.000652703	0.00302092	6.71738e-05	0.00584177	0.00190851	0.0116897	0.00446843	0.00250325	7.52174e-05	0.00144144	4.09054e-05	0.000205009	0.00184381	5.74655e-05	0.000171353	0.000368338	0.000383941	4.77897e-05	0.0012792	0.000579598	0.00312737	9.50781e-05	0.000544581	0.000138698	0.000721091	0	0.00619191	0.000674816	0.00208581	0.00387994	0.000461954	0.00100999
Nitrospirales	6.20472e-05	0	1.33668e-05	0	0	2.8426e-05	1.49869e-05	1.45866e-05	0	0	0	0	0	1.79093e-05	0	1.64198e-05	0	0	0	0	0	1.43497e-05	0	2.73299e-05	0	3.0087e-05	7.20721e-05	4.09054e-05	1.57699e-05	0	2.87327e-05	0	0.00125235	3.33862e-05	0	0.000858412	5.9446e-05	0	0.000602161	1.36145e-05	3.08219e-05	0.00026082	0	7.21667e-05	0.00156172	0	0	0	1.40276e-05
Oscillospirales	0.102657	0.315035	0.0937817	0.271771	0.0057871	0.285028	0.283162	0.458063	0.319541	0.16941	0.0877877	0.217695	0.412083	0.069488	0.378739	0.00474533	0.00258078	0.244689	0.0851446	0.00607923	0.412678	0.186244	0.307412	0.272301	0.201532	0.0357884	0.241182	0.0981865	0.0685202	0.398249	0.00722628	0.066703	0.060481	0.0260579	0.0140342	0.152545	0.201596	0.0832413	0.170269	0.0841241	0.0527824	0.0705442	0.00131473	0.373838	0.0554699	0.279367	0.410855	0.318171	0.201647
PLTA13	1.55118e-05	0	0	0	0	1.4213e-05	1.49869e-05	0	0	0	0	0	0	3.58185e-05	0	0	0	0	4.53138e-05	0	0	5.73987e-05	0	0	0	3.0087e-05	8.64865e-05	0	1.57699e-05	0	7.18319e-05	0	0.00154702	0	0	0.000908907	1.48615e-05	0	0.000459544	0	9.24656e-05	0.000276163	0	5.77334e-05	0.00154244	0	0	0	0
Paenibacillales	0.000139606	0	0	0	0.000122263	5.68521e-05	0	0	0	0	0	0	0	0.000197002	0	0.000328396	0.000172052	5.93366e-05	0.000256778	0.000201521	5.4216e-05	0.000100448	1.35927e-05	1.36649e-05	2.70621e-05	0.000165478	2.88288e-05	0	0.000236548	0	0.000244228	0.000249241	0.000460422	0.000133545	0.000270808	0.000319801	0.000118892	0	9.50781e-05	0	0.000184931	0.000168766	0.000213644	0.000202067	0.000520572	0	0	0	5.61104e-05
Peptostreptococcales_Tissierellales	0.00125646	0.0055179	0.013955	0.000534955	0.00211922	0.00945166	0.000269764	0.00536787	0.0106776	0.000252412	0.000322594	0.00199657	0.00112032	0.00159393	0.00409478	0.000476175	0.00043013	0.00200261	0.000468243	0.000520597	0.00277857	0.000530938	0.00917506	0.000587592	0.00372104	0.000481391	0.00102342	0.000395419	0.00135621	0.00210331	0.000416625	0.000934652	0.00149177	0.00146899	0.000350458	0.00109406	0.00209547	0.000199619	0.0010934	0.00970715	0.00110959	0.002823	0.000608063	0.00779401	0.00179308	0.0064337	0.0103994	0.0120108	0.00171137
Propionibacteriales	0.000232677	0	1.33668e-05	0	4.07542e-05	2.8426e-05	1.49869e-05	0	0	0	0	0	0	7.16371e-05	0	0.000229878	0.000258078	1.48342e-05	0.000241674	0.000352663	5.4216e-05	1.43497e-05	0	0	0	0.000285826	0	0	0.000236548	0	0.00015803	0.00018693	3.68338e-05	0.000116852	0.000366388	3.36632e-05	4.45845e-05	0	1.58464e-05	0	0.000154109	4.60271e-05	0.000361551	8.66001e-05	0	0	0	0	1.40276e-05
Pseudomonadales	0.0129524	0.00169469	0.000601508	0.0002534	0.00414335	0.00429233	0.000179843	0.000262559	0.000210742	0.000168275	0.000308568	5.5848e-05	0.000165973	0.0153124	0.000300666	0.0214771	0.0202849	0.00189877	0.0161317	0.0202025	0.00178913	0.00489324	0.000163112	0.00207707	0.000879519	0.0161567	0.00435315	0.000136351	0.0173469	0.000177552	0.0110908	0.0162785	0.0185826	0.0218847	0.0215691	0.0118663	0.00750505	0.000186311	0.00809749	0.000136145	0.0150873	0.0146213	0.0198689	0.0100312	0.0192033	0.000308465	0.000158659	8.66163e-05	0.00307205
Pseudonocardiales	0.00110134	0.000149132	4.01005e-05	1.40778e-05	0.000652068	0.000270047	1.49869e-05	1.45866e-05	2.8099e-05	2.80458e-05	4.20775e-05	1.3962e-05	0	0.00247148	2.86348e-05	0.00256149	0.00184096	0.000103839	0.00176724	0.00225032	0.000149094	0.000774882	1.35927e-05	0.000259634	5.41243e-05	0.00206096	0.000605405	2.72702e-05	0.00181354	0	0.00139354	0.00185373	0.00221003	0.00196979	0.00235763	0.00138019	0.000951135	2.66159e-05	0.00099832	2.7229e-05	0.00132534	0.00162629	0.00264589	0.00102477	0.00235222	0	0	1.44361e-05	0.000238469
RF39	0.00176835	0.000189805	0.000147035	0.0363488	0	0.00275733	0.00467591	8.75197e-05	2.8099e-05	0.000238389	4.20775e-05	0.00603158	0.0107329	0.000232821	0.000687236	9.85189e-05	3.44104e-05	0.00631935	1.51046e-05	0.000117554	4.0662e-05	0.00285558	0.00535552	0.00888221	2.70621e-05	4.51304e-05	0.00557838	0	4.73097e-05	0.00342812	5.74655e-05	0.000685412	0.000957678	5.00793e-05	0.00173636	0.00175049	0.00804007	1.3308e-05	0.000269388	4.08436e-05	0.000339041	0.000122739	0.000115039	0.000764967	3.85609e-05	0.000117511	0	5.77442e-05	0.0040119
Rhizobiales	0.00342811	0.000366052	0.000374272	0.000154855	0.0013313	0.00126496	0.000134882	4.37598e-05	0.000126445	0.000140229	0.000140258	2.7924e-05	0.000152142	0.00449523	0.000171809	0.0057962	0.005953	0.000563698	0.00406314	0.00609602	0.000515052	0.00126277	0.000108741	0.000546597	0.000162373	0.00413696	0.00125405	0.000136351	0.00498328	5.46314e-05	0.003333	0.00411247	0.00521198	0.00582589	0.0055914	0.00373662	0.00215492	2.66159e-05	0.00248788	2.7229e-05	0.00397602	0.00435723	0.00629427	0.00262687	0.00674816	8.81329e-05	7.21178e-05	4.33082e-05	0.000476939
Rhodobacterales	0.000372283	4.06725e-05	8.0201e-05	5.63111e-05	0.000176602	0.000184769	0	1.45866e-05	1.40495e-05	2.80458e-05	5.61033e-05	0	0	0.000447732	2.86348e-05	0.000656793	0.000671002	4.45025e-05	0.000498452	0.000570978	1.3554e-05	0.000200895	1.35927e-05	5.46597e-05	2.70621e-05	0.000376087	1.44144e-05	1.36351e-05	0.000346937	0	0.000172396	0.000420594	0.000515673	0.000634338	0.000509757	0.000134653	0.000178338	0	4.75391e-05	1.36145e-05	0.000539383	0.000214793	0.000673799	0.0003031	0.000269926	1.46888e-05	0	1.44361e-05	2.80552e-05
Rhodospirillales	0	0	0	0	0	0	0	0	0	0	0	0	0	0	0	0	0	0	0	0	0	1.43497e-05	0	0.00218639	0	0	0	0	0	0	0	0	0	0	0	0	0	0	0	0	0	0	0	0	0	0	0	0	0
Rickettsiales	0.00680969	0.000582972	0.000147035	4.22333e-05	0.00256752	0.00149237	0.00019483	7.29331e-05	0.000182643	0.00566525	0.000126233	2.7924e-05	0.000110649	0.00816663	0.000128857	0.0112476	0.0108393	0.000771376	0.00750699	0.0109661	0.000623484	0.0023103	9.51488e-05	0.000778901	0.00063596	0.00722087	0.00165766	2.72702e-05	0.0081688	8.19471e-05	0.00543049	0.00808474	0.00681425	0.0100826	0.0105775	0.00417424	0.00371537	9.31557e-05	0.00291573	5.44581e-05	0.00679622	0.00509367	0.0103699	0.00427227	0.00715305	7.34441e-05	8.65414e-05	0.000101052	0.00124846
Saccharimonadales	0	0.000135575	0.000160402	7.03888e-05	0.000393958	5.68521e-05	0	0.000102106	2.8099e-05	2.80458e-05	0.000392723	4.1886e-05	1.38311e-05	0	0.000100222	0	0	0.000103839	0	0	0.000718362	5.73987e-05	1.35927e-05	8.19896e-05	0.000108249	1.50435e-05	5.76577e-05	0.000422689	1.57699e-05	9.56049e-05	0.00015803	7.78877e-05	0.000110501	6.67724e-05	0	1.68316e-05	5.9446e-05	0.000412547	0	2.7229e-05	3.08219e-05	6.13695e-05	0	0.000404134	0.000115683	2.93776e-05	0.000187506	4.33082e-05	1.40276e-05
Sphingobacteriales	0.00325748	0.00032538	8.0201e-05	2.81555e-05	0.0014264	0.000639586	4.49607e-05	4.37598e-05	1.40495e-05	1.40229e-05	1.40258e-05	1.3962e-05	0	0.00257894	1.43174e-05	0.00796361	0.00769072	0.000341186	0.00422929	0.00832955	0.000352404	0.00113362	4.0778e-05	0.000409948	0.000135311	0.00476878	0.00074955	2.72702e-05	0.00536176	5.46314e-05	0.00301694	0.00433056	0.00217319	0.00737835	0.00683393	0.00129603	0.00170907	1.3308e-05	0.000728932	1.36145e-05	0.00433047	0.00223999	0.00857861	0.00271347	0.00208229	0	4.32707e-05	2.88721e-05	0.000785546
Sphingomonadales	0.0015822	0.000257592	0.000467839	0.000168933	0.000855839	0.000397965	4.49607e-05	5.83465e-05	8.42969e-05	7.01144e-05	7.01292e-05	2.7924e-05	5.53243e-05	0.00288339	0.000128857	0.00315261	0.00337222	0.000400522	0.00193339	0.00356021	0.000298188	0.000530938	0.000285446	0.000450943	0.00025709	0.0019707	0.000677477	0.0005045	0.00252318	0.000273157	0.00147974	0.00179142	0.00279937	0.00332193	0.0026125	0.00185148	0.00101058	0.000106464	0.00133109	0.000176989	0.00208048	0.00174903	0.00350047	0.0011258	0.00267998	0.000176266	0.000100965	5.77442e-05	0.000378745
Staphylococcales	0.0509563	0.00711768	0.00122975	0.000844666	0.0320192	0.0184485	0.000719371	0.000466772	0.000351237	0.000210343	0.00016831	0.000195468	0.000373439	0.0562888	0.000372253	0.0847427	0.0819483	0.0065567	0.0712031	0.0833627	0.00548937	0.0268626	0.000598078	0.00870456	0.00445172	0.0726299	0.00954234	0.000709026	0.0744812	0.000450709	0.0604681	0.0689773	0.0208111	0.073266	0.0827718	0.0137851	0.0337059	0.000665398	0.0101892	0.000599039	0.0604417	0.02711	0.0851945	0.0420155	0.0209964	0.000514109	0.000216353	0.000216541	0.0164263
Steroidobacterales	9.30709e-05	2.7115e-05	1.33668e-05	2.81555e-05	1.35847e-05	5.68521e-05	0	2.91732e-05	1.40495e-05	0	0	0	0	0.000125365	0	4.92595e-05	0	4.45025e-05	9.06276e-05	0	1.3554e-05	0.000100448	0	1.36649e-05	1.35311e-05	0.000120348	0.000317117	0	0.000141929	0	0.000143664	4.67326e-05	0.00651958	0.000100159	0.000143369	0.00400592	5.9446e-05	2.66159e-05	0.00291573	1.36145e-05	0.000184931	0.00184108	0	0.000404134	0.00721089	0	0	0	2.80552e-05
Streptomycetales	0.000791102	0.00010846	5.34674e-05	1.40778e-05	0.000448296	0.00028426	1.49869e-05	1.45866e-05	2.8099e-05	2.80458e-05	1.40258e-05	0	0	0.00182675	2.86348e-05	0.00200322	0.00182375	7.41708e-05	0.00148025	0.00189766	9.48779e-05	0.000358742	0	0.000136649	6.76553e-05	0.00139904	0.000172973	0	0.000851574	1.36578e-05	0.000933814	0.00107485	0.00139968	0.00181955	0.0015452	0.00109406	0.000639044	0	0.000808164	4.08436e-05	0.00121746	0.00084383	0.00180775	0.000822701	0.00171596	0	0	0	0.000196386
Synergistales	0	0	0.000441106	1.40778e-05	0.000122263	0	4.49607e-05	0	8.42969e-05	4.20687e-05	5.61033e-05	1.3962e-05	0	0.000537278	2.86348e-05	0.000509014	0.000808644	1.48342e-05	1.51046e-05	0.00048701	4.0662e-05	0.000330042	0	0.00243236	0	3.0087e-05	0.000158559	0	0	1.36578e-05	2.87327e-05	0	1.84169e-05	0.000767882	3.18598e-05	0	0.000535014	0	0	0.000762413	0	0	0.000493024	0	0	0.000528797	0	2.88721e-05	0
Thermoactinomycetales	0.00148913	0.000135575	4.01005e-05	5.63111e-05	0.00101886	0.000525882	1.49869e-05	2.91732e-05	1.40495e-05	0	0	0	1.38311e-05	0.00274012	1.43174e-05	0.00305409	0.0029937	0.000252181	0.00202402	0.00310679	0.000176202	0.000904029	0	0.000423613	5.41243e-05	0.0026627	0.000245045	1.36351e-05	0.00208162	2.73157e-05	0.00202566	0.0024301	0.000755092	0.00263751	0.00296296	0.000454454	0.000906551	1.3308e-05	0.000380312	2.7229e-05	0.00198801	0.000721091	0.0034676	0.001299	0.000674816	1.46888e-05	0	2.88721e-05	0.000462911
Veillonellales_Selenomonadales	0.00871764	0.130694	0.36057	0.0991919	0.00112753	0.0336422	0.000839266	0.0342348	0.0616913	0.000785282	0.00138856	0.00184298	0.0482981	0.00585633	0.1033	0.000574694	0.000172052	0.0616359	0.00507515	0.000789292	0.0569268	0.0160286	0.0402751	0.00120251	0.056181	0.0115083	0.233023	0.151445	0.00113543	0.0653664	0.0167799	0.0033959	0.0200192	0.00529171	0.000191159	0.00134653	0.0630722	0.209308	0.00147371	0.0170454	0.0378647	0.156507	0.000164341	0.000591767	0.00146531	0.0263958	0.00206257	0.00994644	0.0032544
Verrucomicrobiales	0.000325748	0.000176247	0.000588141	0.00748937	0.000163017	0.000966486	0.000164856	0.00013128	8.42969e-05	0.000154252	0.000294543	0.00013962	0.0232224	0.000358185	0.0494237	0.000426915	0.00043013	0.000593366	0.000151046	0.000184728	6.777e-05	0.000129147	0.00732646	0.0124898	0.000230028	0.000150435	0.000158559	5.45405e-05	0.000173469	2.73157e-05	0.00156593	0.00476673	0.00154702	0.00026709	0.00834727	0.00474652	0.00112947	1.3308e-05	0.00034862	0.00042205	0.000292808	0.000552325	0.000542326	0.000202067	0.00154244	0.000528797	0.0017741	0.0119242	0.00150095
Xanthomonadales	0.00206307	0.00021692	6.68342e-05	4.22333e-05	0.000719991	0.000540095	0	1.45866e-05	7.02474e-05	5.60915e-05	4.20775e-05	0	0	0.00239984	1.43174e-05	0.00387508	0.00380235	0.000192844	0.00250736	0.00448385	0.000243972	0.000918379	2.71854e-05	0.000341623	6.76553e-05	0.00239191	0.000418018	1.36351e-05	0.00299628	1.36578e-05	0.00186763	0.00286627	0.00184169	0.00377264	0.0035683	0.00126237	0.00124837	5.32318e-05	0.000808164	1.36145e-05	0.0029589	0.00177971	0.00373055	0.00111137	0.00219797	1.46888e-05	0	4.33082e-05	0.000364718
unclassified_Bacilli	0.0541362	0.00803959	0.00104261	0.000915055	0.0343015	0.0198698	0.000374672	0.000539705	0.000140495	0.00019632	5.61033e-05	9.7734e-05	9.68175e-05	0.0644197	0.000214761	0.0894552	0.0911875	0.0090785	0.0740579	0.0881153	0.00646525	0.027207	0.000475744	0.00937415	0.00595367	0.0726149	0.0209153	0.000599945	0.0782817	0.000437051	0.0605399	0.0691643	0.0688607	0.0766714	0.0854958	0.0430384	0.0391006	0.000771862	0.0362089	0.00042205	0.0632773	0.0559996	0.0925241	0.0521044	0.0682335	0.000470042	0.000173083	0.000259849	0.0174223
unclassified_Bacteria	0.0195914	0.00154555	0.000441106	0.000295633	0.00667011	0.00459081	0.000299738	0.000175039	0.00054793	0.0290975	0.000224413	9.7734e-05	8.29864e-05	0.0185719	0.000257714	0.0311156	0.0362857	0.00194327	0.0233215	0.0332678	0.00158582	0.0067874	0.000244668	0.00170812	0.00150195	0.0219635	0.0049009	0.000177257	0.0284173	0.00031413	0.0137917	0.0259989	0.0161148	0.0279276	0.0321147	0.0101663	0.0102544	0.000199619	0.0076221	0.000190603	0.022238	0.0137621	0.0322438	0.013957	0.0190298	0.000161577	0.000274048	0.000346465	0.00398384
unclassified_Bacteroidia	3.10236e-05	6.77874e-05	0	0.00123884	1.35847e-05	0	1.49869e-05	0	0	9.81602e-05	4.20775e-05	0	0	0	0	1.64198e-05	1.72052e-05	1.48342e-05	0	0	0	0.000286993	1.35927e-05	0.000423613	0	0	0.000432432	0	0	0	0	0	0	0	0	1.68316e-05	5.9446e-05	1.3308e-05	1.58464e-05	0	0	1.53424e-05	0	0	0	8.81329e-05	1.44236e-05	0	0
[truncated: 179 more columns]

## Sheet: Class
Class	JC100	JC107	JC108	JC118	JC119	JC120	JC132	JC135	JC140	JC141	JC145	JC149	JC151	JC16	JC162	JC19	JC2	JC23	JC25	JC30	JC31	JC35	JC40	JC42	JC43	JC45	JC47	JC54	JC61	JC64	JC69	JC70	JC75	JC76	JC81	JC83	JC89	JC9	JC93	JF1	JF109	JF112	JF116	JF122	JF128	JF129	JF138	JF139	JF14
Acidimicrobiia	1.55118e-05	0	1.33668e-05	0	1.35847e-05	1.4213e-05	0	0	0	0	0	1.3962e-05	0	0	0	0	0	1.48342e-05	4.53138e-05	0	0	7.17484e-05	0	2.73299e-05	1.35311e-05	1.50435e-05	8.64865e-05	0	1.57699e-05	1.36578e-05	7.18319e-05	1.55775e-05	0.00158385	0	4.77897e-05	0.000875244	0	0	0.000744779	0	7.70547e-05	0.000352874	0	8.66001e-05	0.00175452	0	0	0	0
Actinobacteria	0.0344052	0.0149268	0.00906272	0.00777093	0.0176737	0.0115552	0.000824279	0.038144	0.00198098	0.0208661	0.00180933	0.000949416	0.036431	0.0650107	0.00293507	0.0672063	0.0645539	0.00488044	0.0570048	0.0649739	0.0328142	0.0162438	0.00458073	0.00519268	0.00686025	0.0567891	0.0147027	0.00136351	0.0618337	0.0136169	0.0378698	0.0488667	0.080316	0.0637176	0.0639427	0.0548879	0.0227827	0.113823	0.0364466	0.00122531	0.0478972	0.0369291	0.0656872	0.0255615	0.0864536	0.00099884	0.000865414	0.000534134	0.0255162
Alphaproteobacteria	0.0206772	0.00210141	0.00157729	0.000563111	0.00830028	0.00528725	0.000584489	0.000452185	0.000716524	0.00614202	0.000757395	0.000307164	0.000553243	0.028225	0.00094495	0.035746	0.0357696	0.00272948	0.0239408	0.0347457	0.00227707	0.00757663	0.000747597	0.0049877	0.00166432	0.0240395	0.00556396	0.000804472	0.0276761	0.000518998	0.0171678	0.0242386	0.0218977	0.0337367	0.0332298	0.0145762	0.0121418	0.000425855	0.0100466	0.00057181	0.0232705	0.0172908	0.0346924	0.013856	0.0244476	0.000631619	0.000418283	0.000375337	0.00409606
Anaerolineae	3.10236e-05	4.06725e-05	0	1.40778e-05	0	0	0	0	0	0	0	0	0	0	1.43174e-05	0	0	0	3.02092e-05	0	0	0	0	0	4.05932e-05	1.50435e-05	7.20721e-05	0	3.15398e-05	0	4.30991e-05	0	0.00209952	3.33862e-05	3.18598e-05	0.00104356	1.48615e-05	1.3308e-05	0.00069724	0	0.00016952	0.000629037	0	2.88667e-05	0.00229437	0	0	1.44361e-05	0
Bacilli	0.421254	0.0747966	0.0308239	0.0598587	0.290741	0.167955	0.0188085	0.0106628	0.0388187	0.00436112	0.0134929	0.0160144	0.0197369	0.556513	0.0199442	0.639716	0.630106	0.105233	0.529175	0.632341	0.0663061	0.234904	0.0210958	0.0932905	0.0533395	0.529606	0.15236	0.0115626	0.556835	0.0657489	0.487954	0.50937	0.493867	0.56815	0.618112	0.351276	0.306815	0.0184848	0.268627	0.0655948	0.483179	0.380076	0.641358	0.350745	0.498477	0.0100325	0.0135293	0.0135699	0.147641
Bacteroidia	0.179797	0.216866	0.103192	0.329758	0.00839537	0.302766	0.243237	0.29074	0.313809	0.21915	0.29962	0.23128	0.253468	0.0187868	0.242737	0.0182917	0.0153298	0.23257	0.0734084	0.018372	0.133886	0.262111	0.281015	0.338972	0.29403	0.134022	0.0671568	0.300791	0.0272661	0.137575	0.0429124	0.0769842	0.125216	0.0385611	0.0181442	0.109119	0.149299	0.268155	0.250673	0.311922	0.133597	0.170131	0.0166149	0.0208273	0.108896	0.390488	0.274682	0.327583	0.183327
Campylobacteria	0	5.42299e-05	0.000280704	1.40778e-05	4.07542e-05	1.4213e-05	8.99213e-05	0.000175039	5.61979e-05	4.20687e-05	2.80517e-05	0.000181506	0.000152142	0	0.000214761	0	0	0.000267015	0	1.67935e-05	4.0662e-05	0	4.0778e-05	5.46597e-05	2.70621e-05	1.50435e-05	2.88288e-05	5.45405e-05	0	4.09735e-05	2.87327e-05	1.55775e-05	9.20844e-05	5.00793e-05	0	6.73265e-05	1.48615e-05	5.32318e-05	0	0.0105376	1.54109e-05	6.13695e-05	0	1.44333e-05	7.71218e-05	0.000146888	5.76942e-05	0.000129924	0
Clostridia	0.189461	0.521461	0.186227	0.480896	0.0380916	0.405228	0.494657	0.595513	0.402546	0.308503	0.294332	0.468648	0.562703	0.115175	0.549044	0.0184066	0.0138502	0.434656	0.140941	0.0201354	0.675572	0.328981	0.608422	0.473476	0.526643	0.0536601	0.456562	0.300504	0.129423	0.676787	0.0200411	0.142659	0.114608	0.0621317	0.0342015	0.364539	0.336642	0.31802	0.251767	0.166683	0.100587	0.11114	0.012342	0.464537	0.101627	0.529473	0.642137	0.603889	0.299405
Coriobacteriia	0.000263701	0.00524675	0.00215206	0.000774277	0.00129055	0.00208931	0.0012589	0.00112317	0.00134875	0.000490801	0.000448827	0.000949416	0.00026279	0.000179093	0.00552652	1.64198e-05	0	0.00145375	1.51046e-05	1.67935e-05	0.00105721	0.000573987	0.00020389	0.00101121	0.000270621	0.000346	0.000936937	0.000654486	0.000189239	0.00549045	5.74655e-05	0.000373861	0.000257836	0.000367248	0.000111509	0.00146435	0.00462192	1.3308e-05	0.0084778	0.000108916	0.000631848	0.000460271	1.64341e-05	0.00340627	0.00190876	0.00127793	0.00576942	0.00171789	0.000182359
Cyanobacteriia	0.000620472	0.000122017	0.000534674	1.40778e-05	0.000665652	0.000255834	0.000269764	0.000116693	0.000407435	0.00646455	0.000448827	0.000167544	0.000207466	0.00109247	0.000429523	0.00208532	0.00218506	0.000281849	0.000891171	0.00191445	0.000189756	0.000373091	9.51488e-05	0.000177644	0.0010013	0.000676956	0.000158559	2.72702e-05	0.00165584	0.000150236	0.000675219	0.00123063	0.0011971	0.00185293	0.0012266	0.000538612	0.000549875	1.3308e-05	0.00052293	5.44581e-05	0.0009863	0.00113534	0.00212	0.000606201	0.00121467	0.000235021	0.000216353	0.000101052	0.000182359
Desulfovibrionia	0.00127197	0.000135575	0.00268673	0.00858744	0.000108678	0.000213195	0.000209816	0.00786219	0.0028099	0.000869419	0.000659214	0.000153582	0.00091285	5.37278e-05	0.000587014	4.92595e-05	5.16156e-05	0.000563698	1.51046e-05	5.03804e-05	9.48779e-05	0.00087533	0.000734005	0.00875922	0.000297683	0.000120348	0.00151351	0.00515408	0.000126159	0.000259499	0.000129297	0.00144871	0.000791926	0.000150238	3.18598e-05	0.000353464	0.000728213	7.98478e-05	0.000871549	0.00235531	6.16437e-05	0.000245478	3.28682e-05	0.0001299	0.00040489	0.00145419	0.00178852	0.00062075	0.000729436
Fusobacteriia	0	2.7115e-05	2.67337e-05	0	0	8.52781e-05	4.49607e-05	0	2.8099e-05	4.20687e-05	0	1.3962e-05	0	0	1.43174e-05	1.64198e-05	1.72052e-05	2.96683e-05	1.51046e-05	0	0.000487944	1.43497e-05	0	1.36649e-05	0	0	2.88288e-05	2.72702e-05	1.57699e-05	1.36578e-05	1.43664e-05	1.55775e-05	0.00029467	1.66931e-05	4.77897e-05	3.36632e-05	0	0	3.16927e-05	0.00325387	3.08219e-05	0.000122739	0	0	0.000192805	0	1.44236e-05	1.44361e-05	0
Gammaproteobacteria	0.122435	0.0313313	0.287374	0.00442042	0.625713	0.0650104	0.236433	0.0203921	0.17486	0.380679	0.295468	0.262876	0.0536922	0.189032	0.0195146	0.184296	0.199133	0.152154	0.145684	0.190992	0.0278263	0.123048	0.0347157	0.0353375	0.0572635	0.163568	0.061391	0.21463	0.164306	0.0338168	0.360524	0.156274	0.117021	0.195426	0.188865	0.0778294	0.0908186	0.0671253	0.14501	0.418633	0.148885	0.109468	0.192591	0.102304	0.139108	0.0247653	0.0408043	0.0238484	0.315888
Negativicutes	0.00967937	0.130979	0.374405	0.0994594	0.00141281	0.0338412	0.00305732	0.0343952	0.0618739	0.0230676	0.0919674	0.0181506	0.0485609	0.0059817	0.108283	0.000640373	0.000326899	0.0624518	0.00512046	0.0010244	0.0570352	0.017851	0.0407509	0.0219186	0.0566952	0.0147276	0.234076	0.163717	0.00179777	0.065503	0.0169092	0.00763299	0.0217135	0.00569235	0.00125846	0.0075574	0.0634586	0.213167	0.0175102	0.0176444	0.0379263	0.157275	0.000312248	0.00321864	0.0108935	0.0392485	0.0174814	0.0152589	0.0174924
Nitrospiria	6.20472e-05	0	1.33668e-05	0	0	2.8426e-05	1.49869e-05	1.45866e-05	0	0	0	0	0	1.79093e-05	0	1.64198e-05	0	0	0	0	0	1.43497e-05	0	2.73299e-05	0	3.0087e-05	7.20721e-05	4.09054e-05	1.57699e-05	0	2.87327e-05	0	0.00125235	3.33862e-05	0	0.000858412	5.9446e-05	0	0.000602161	1.36145e-05	3.08219e-05	0.00026082	0	7.21667e-05	0.00156172	0	0	0	1.40276e-05
Saccharimonadia	0	0.000135575	0.000160402	7.03888e-05	0.000393958	5.68521e-05	0	0.000102106	2.8099e-05	2.80458e-05	0.000392723	4.1886e-05	1.38311e-05	0	0.000100222	0	0	0.000103839	0	0	0.000718362	5.73987e-05	1.35927e-05	8.19896e-05	0.000108249	1.50435e-05	5.76577e-05	0.000422689	1.57699e-05	9.56049e-05	0.00015803	7.78877e-05	0.000110501	6.67724e-05	0	1.68316e-05	5.9446e-05	0.000412547	0	2.7229e-05	3.08219e-05	6.13695e-05	0	0.000404134	0.000115683	2.93776e-05	0.000187506	4.33082e-05	1.40276e-05
Synergistia	0	0	0.000441106	1.40778e-05	0.000122263	0	4.49607e-05	0	8.42969e-05	4.20687e-05	5.61033e-05	1.3962e-05	0	0.000537278	2.86348e-05	0.000509014	0.000808644	1.48342e-05	1.51046e-05	0.00048701	4.0662e-05	0.000330042	0	0.00243236	0	3.0087e-05	0.000158559	0	0	1.36578e-05	2.87327e-05	0	1.84169e-05	0.000767882	3.18598e-05	0	0.000535014	0	0	0.000762413	0	0	0.000493024	0	0	0.000528797	0	2.88721e-05	0
Thermotogae	0.000108583	5.42299e-05	0	0	0.000203771	4.26391e-05	0	0	0	0	0	0	0	0.000465641	0	0.00146136	0.00115275	5.93366e-05	0.000226569	0.00147782	0	5.73987e-05	1.35927e-05	4.09948e-05	1.35311e-05	0.000210609	1.44144e-05	1.36351e-05	0.000205009	1.36578e-05	2.87327e-05	3.11551e-05	0	0.00105167	0.000254879	5.04948e-05	7.43075e-05	0	0	0	9.24656e-05	4.60271e-05	0.000953179	4.33e-05	0	0	0	0	2.80552e-05
Verrucomicrobiae	0.000325748	0.000176247	0.000588141	0.00748937	0.000163017	0.000966486	0.000164856	0.00013128	8.42969e-05	0.000154252	0.000294543	0.00013962	0.0232224	0.000358185	0.0494237	0.000426915	0.00043013	0.000593366	0.000151046	0.000184728	6.777e-05	0.000129147	0.00732646	0.0124898	0.000230028	0.000150435	0.000158559	5.45405e-05	0.000173469	2.73157e-05	0.00156593	0.00476673	0.00154702	0.00026709	0.00834727	0.00474652	0.00112947	1.3308e-05	0.00034862	0.00042205	0.000292808	0.000552325	0.000542326	0.000202067	0.00154244	0.000528797	0.0017741	0.0119242	0.00150095
unclassified_Bacteria	0.0195914	0.00154555	0.000441106	0.000295633	0.00667011	0.00459081	0.000299738	0.000175039	0.00054793	0.0290975	0.000224413	9.7734e-05	8.29864e-05	0.0185719	0.000257714	0.0311156	0.0362857	0.00194327	0.0233215	0.0332678	0.00158582	0.0067874	0.000244668	0.00170812	0.00150195	0.0219635	0.0049009	0.000177257	0.0284173	0.00031413	0.0137917	0.0259989	0.0161148	0.0279276	0.0321147	0.0101663	0.0102544	0.000199619	0.0076221	0.000190603	0.022238	0.0137621	0.0322438	0.013957	0.0190298	0.000161577	0.000274048	0.000346465	0.00398384
[truncated: 179 more columns]

## Sheet: Family
Family	JC100	JC107	JC108	JC118	JC119	JC120	JC132	JC135	JC140	JC141	JC145	JC149	JC151	JC16	JC162	JC19	JC2	JC23	JC25	JC30	JC31	JC35	JC40	JC42	JC43	JC45	JC47	JC54	JC61	JC64	JC69	JC70	JC75	JC76	JC81	JC83	JC89	JC9	JC93	JF1	JF109	JF112	JF116	JF122	JF128	JF129	JF138	JF139	JF14
Acetobacteraceae	0.00834535	0.000827007	0.000441106	0.0001267	0.00331468	0.00191876	0.000209816	0.000262559	0.000295039	0.000238389	0.000350646	0.000223392	0.000235128	0.0121067	0.000486792	0.0147286	0.0147793	0.000904883	0.00983309	0.0134516	0.00081324	0.00322868	0.000176705	0.000888221	0.000541243	0.0103048	0.00191712	5.45405e-05	0.0114962	5.46314e-05	0.006666	0.00968923	0.00644591	0.0137384	0.0137953	0.00447721	0.00494888	0.000159696	0.00321681	0.000190603	0.00966265	0.0057227	0.0137225	0.00536921	0.00730729	0.000264399	0.000158659	0.000158797	0.00192178
Acidaminococcaceae	0.000961732	0.000284707	0.0138347	0.000267478	0.00028528	0.000198982	0.00221806	0.000160453	0.000182643	0.0222824	0.0905788	0.0163076	0.00026279	0.000125365	0.00498246	6.56793e-05	0.000154847	0.000815878	4.53138e-05	0.000235108	0.000108432	0.00182241	0.000475744	0.020716	0.000514181	0.0032193	0.00105225	0.0122716	0.000662335	0.000136578	0.000129297	0.00423709	0.00169435	0.000400634	0.0010673	0.00621087	0.000386399	0.00385931	0.0160365	0.000599039	6.16437e-05	0.000767118	0.000147907	0.00262687	0.00942814	0.0128527	0.0154188	0.00531247	0.014238
Actinomycetaceae	3.10236e-05	8.13449e-05	0.000200503	0	0.00025811	0.00014213	1.49869e-05	0.000102106	0.000210742	0	0.000294543	0	0.000414932	1.79093e-05	0.000214761	0	0	5.93366e-05	0	0	0.00033885	2.86993e-05	0.000108741	4.09948e-05	4.05932e-05	0	4.32432e-05	0.000204527	0	0.00019121	0.000100565	0	9.20844e-05	3.33862e-05	1.59299e-05	5.04948e-05	2.9723e-05	0.000226235	3.16927e-05	0.000340363	6.16437e-05	4.60271e-05	0	0.000115467	7.71218e-05	5.87553e-05	8.65414e-05	2.88721e-05	8.41656e-05
Aerococcaceae	0	0	0	0	0	1.4213e-05	0	0	0	0	0	0	0	0	0	0	0	0	0	0	0	0	0	0	0	0	0	0	0	0	0	1.55775e-05	0	0	0	0	0	0	0	0	0	0	0	0	0	0	0	0	0
Aeromonadaceae	1.55118e-05	1.35575e-05	0.000120302	1.40778e-05	1.35847e-05	0	0.000224803	8.75197e-05	0.000295039	0.000154252	0.000308568	8.3772e-05	0.000165973	0	0.00044384	1.64198e-05	1.72052e-05	2.96683e-05	0	0	0	1.43497e-05	5.43707e-05	0	0	0	0	0	0	0	1.43664e-05	0	0.000110501	0	1.59299e-05	5.04948e-05	1.48615e-05	0	1.58464e-05	2.7229e-05	6.16437e-05	4.60271e-05	1.64341e-05	1.44333e-05	7.71218e-05	0.000146888	0.000129812	0.000129924	0
Akkermansiaceae	0.000325748	0.000176247	0.000588141	0.00748937	0.000163017	0.000966486	0.000164856	0.00013128	8.42969e-05	0.000154252	0.000294543	0.00013962	0.0232224	0.000358185	0.0494237	0.000426915	0.00043013	0.000593366	0.000151046	0.000184728	6.777e-05	0.000129147	0.00732646	0.0124898	0.000230028	0.000150435	0.000158559	5.45405e-05	0.000173469	2.73157e-05	0.00156593	0.00476673	0.00154702	0.00026709	0.00834727	0.00474652	0.00112947	1.3308e-05	0.00034862	0.00042205	0.000292808	0.000552325	0.000542326	0.000202067	0.00154244	0.000528797	0.0017741	0.0119242	0.00150095
Alcaligenaceae	0.00390898	0.00032538	0.000106935	7.03888e-05	0.00127697	0.00116547	7.49344e-05	0.000102106	0	0	1.40258e-05	0	0	0.00358185	0	0.0071262	0.00619387	0.000578532	0.00521109	0.00643189	0.000447282	0.00157846	5.43707e-05	0.000532932	0.00025709	0.00517496	0.00128288	1.36351e-05	0.00577178	1.36578e-05	0.00367779	0.00515616	0.00596707	0.00646023	0.00643568	0.00360197	0.00237784	7.98478e-05	0.00256711	2.7229e-05	0.00488527	0.00512435	0.00644218	0.00349287	0.00638183	4.40665e-05	0	0	0.000715408
Anaerolineaceae	3.10236e-05	4.06725e-05	0	1.40778e-05	0	0	0	0	0	0	0	0	0	0	1.43174e-05	0	0	0	3.02092e-05	0	0	0	0	0	4.05932e-05	1.50435e-05	7.20721e-05	0	3.15398e-05	0	4.30991e-05	0	0.00209952	3.33862e-05	3.18598e-05	0.00104356	1.48615e-05	1.3308e-05	0.00069724	0	0.00016952	0.000629037	0	2.88667e-05	0.00229437	0	0	1.44361e-05	0
Anaerovoracaceae	0.000108583	8.13449e-05	9.35679e-05	0.000309711	1.35847e-05	0.000113704	8.99213e-05	1.45866e-05	0.010495	7.01144e-05	0	0.000321126	0.000691553	5.37278e-05	0.000486792	1.64198e-05	0	0.00043019	0	0	4.0662e-05	0.000344392	2.71854e-05	0.000382618	6.76553e-05	0	5.76577e-05	0.000299973	1.57699e-05	0.000846786	0	0.000109043	7.36675e-05	3.33862e-05	0	0.000151485	0.000133753	0	0.000206003	0.000925787	6.16437e-05	3.06847e-05	0	0.0003031	3.85609e-05	0.000660997	8.65414e-05	0.000230977	0.000603187
Bacillaceae	0.0309771	0.00509761	0.00413035	0.000549033	0.0199152	0.011541	0.00101911	0.000758504	0.0013347	0.00121999	0.0025527	0.00104715	0.00134161	0.0426062	0.00207603	0.0509179	0.0470906	0.00445025	0.0398912	0.0490705	0.00294122	0.0162008	0.000924302	0.00621755	0.00290918	0.0414749	0.00712072	0.000763567	0.0428783	0.000833128	0.0373238	0.0380559	0.0193561	0.0406978	0.0464357	0.012994	0.0207912	0.000319391	0.0107121	0.00027229	0.0358612	0.0200832	0.0496639	0.0243202	0.0204373	0.000984151	0.000591366	0.000692931	0.00822018
Bacteroidaceae	0.0585261	0.197533	0.0948244	0.0883521	0.00239091	0.0603485	0.209067	0.229185	0.242452	0.16439	0.241441	0.155983	0.146817	0.00282966	0.0978309	0.00295557	0.00115275	0.0399039	0.0583189	0.00272054	0.132856	0.195199	0.258859	0.252692	0.210543	0.0194663	0.0221117	0.1488	0.01864	0.0711027	0.0331863	0.0282265	0.0554348	0.00938152	0.00476304	0.0683364	0.0577815	0.175559	0.203404	0.132837	0.0493458	0.0219549	0.00167628	0.0112003	0.0701037	0.355132	0.206343	0.248473	0.155496
Barnesiellaceae	0.00369181	0.00195228	0.000895578	5.63111e-05	2.71695e-05	0.0119247	0.00665418	0.0148638	5.61979e-05	0.00377216	2.80517e-05	0.00728816	0.000691553	1.79093e-05	0.000357935	1.64198e-05	1.72052e-05	0.000875215	6.04184e-05	3.35869e-05	6.777e-05	0.00242509	2.71854e-05	0.0171085	4.05932e-05	3.0087e-05	7.20721e-05	0.00140442	4.73097e-05	0.000532656	4.30991e-05	0.00236779	0.00372021	6.67724e-05	0.000637196	0.000336632	0.00282368	0	0.00326435	1.36145e-05	0.000385273	0.000138081	0	0.000245367	7.71218e-05	0.00487669	0.00274048	1.44361e-05	0
Beijerinckiaceae	0.00162874	0.000176247	2.67337e-05	2.81555e-05	0.000597729	0.000497456	7.49344e-05	1.45866e-05	1.40495e-05	0	0	0	0	0.00189838	0	0.00270927	0.00292488	0.00017801	0.00205423	0.00280451	0.00020331	0.000602686	2.71854e-05	0.000204974	0.000108249	0.00212113	0.000691892	1.36351e-05	0.00231817	1.36578e-05	0.00165213	0.00227432	0.00235736	0.00285452	0.00291517	0.00166633	0.000832243	0	0.00120432	1.36145e-05	0.0019726	0.00200985	0.00294171	0.00132787	0.0026607	2.93776e-05	1.44236e-05	0	0.000280552
Bifidobacteriaceae	0.00187693	0.010968	0.00733839	0.00678548	0.000665652	0.00103755	0.000164856	0.0375459	0.00081487	0.0205996	0.0012483	0.000753948	0.035449	0.00111037	0.00150333	0.000410496	0.000172052	0.00078621	0.00901745	0.000268695	0.0292089	0.00106188	0.00266417	0.000519268	0.00461409	0.00941722	0.00699099	0.000286338	0.0122374	0.0119233	0.00258595	0.00104369	0.056061	0.000734496	0.000844285	0.0406315	0.00105517	0.112865	0.025164	0.00042205	0.00248116	0.0145906	6.57365e-05	0.0023815	0.0615046	0.000660997	0.000230777	0.000259849	0.017282
Brevibacteriaceae	0.0123784	0.00120662	0.000187136	0.000197089	0.00646634	0.0040365	0.00019483	0.000189626	8.42969e-05	7.01144e-05	5.61033e-05	2.7924e-05	0	0.0280459	5.72697e-05	0.0255328	0.0246894	0.00158725	0.0180802	0.025039	0.00120631	0.00529503	0.000285446	0.00185843	0.00075774	0.0188645	0.00272432	0.000163621	0.0190973	0.000122921	0.0134613	0.0183971	0.00681425	0.0259077	0.0237037	0.00451087	0.00808465	0.000119772	0.00399328	0.000122531	0.0160736	0.00699612	0.024832	0.00857341	0.00761578	0.000161577	2.88471e-05	4.33082e-05	0.00297385
Butyricicoccaceae	0.000403307	0.007782	0.00470513	0.00183011	0.000190186	0.00923847	0.00202323	0.00700158	0.00955365	0.000799304	0.0105615	0.00460746	0.0026694	0.000680552	0.000544062	4.92595e-05	1.72052e-05	0.00394589	0.00140473	3.35869e-05	0.00299543	0.00552462	0.011513	0.00538398	0.00262503	0.000165478	0.00184505	0.00943551	0.000946193	0.00551777	0.000430991	0.00221201	0.00178644	0.000617645	0.000143369	0.00136336	0.000193199	2.66159e-05	0.00256711	0.00119808	0.000893834	0.00243944	0	0.00161653	0.00291135	0.00233552	0.00571173	0.00804088	0.00495175
Campylobacteraceae	0	0	0	0	0	0	0	0	0	0	0	0	4.14932e-05	0	0	0	0	0	0	0	0	0	1.35927e-05	0	0	0	1.44144e-05	0	0	0	0	0	0	0	0	0	0	0	0	0.0104696	0	0	0	0	0	0	0	0	0
Carnobacteriaceae	0.000496378	0.00010846	4.01005e-05	0	0.000393958	0.000198982	1.49869e-05	1.45866e-05	0.000365287	2.80458e-05	0.00016831	1.3962e-05	1.38311e-05	0.000465641	2.86348e-05	0.000853831	0.000739823	7.41708e-05	0.000513556	0.00110837	0.000162648	0.000315693	8.15561e-05	0.000109319	4.05932e-05	0.000346	5.76577e-05	0.000545405	0.000520406	6.82892e-05	0.000531556	0.000467326	0.000773509	0.000801269	0.000653126	8.41581e-05	0.000237784	3.99239e-05	0.000110924	1.36145e-05	0.000693492	0.000245478	0.000788838	0.000144333	0.000134963	5.87553e-05	0.000129812	0	0.000182359
Caulobacteraceae	0.000139606	2.7115e-05	6.68342e-05	1.40778e-05	5.4339e-05	2.8426e-05	0	0	1.40495e-05	0	1.40258e-05	0	0	0.000125365	0	0.000164198	0.000154847	4.45025e-05	0.000105732	0.000100761	1.3554e-05	2.86993e-05	6.79634e-05	8.19896e-05	4.05932e-05	3.0087e-05	4.32432e-05	6.81756e-05	0.000157699	5.46314e-05	8.61982e-05	0.000140198	0.000110501	0.000133545	0.000143369	0.000201979	0.000133753	3.99239e-05	4.75391e-05	0.000108916	0.000215753	0.000153424	0.000131473	0.000158767	0.000289207	1.46888e-05	0	0	4.20828e-05
Christensenellaceae	0.00150465	0.00639913	0.00122975	0.00340682	0.000339619	0.00727707	0.0407793	0.0140761	0.0027818	0.00019632	0.000364672	0.00901945	0.00152142	0.00592797	0.047362	6.56793e-05	5.16156e-05	0.00740224	1.51046e-05	0.000319076	0.00138251	0.00297038	0.029333	0.00534299	0.00135311	0.000556609	0.0491532	0.000286338	0.000315398	0.00646016	0.000100565	0.000373861	0.0014181	0.0004841	0.00130625	0.0205009	0.0208061	5.32318e-05	0.00217095	0.00334917	0.00329794	0.000444929	3.28682e-05	0.0121096	0.000925462	0.00408349	0.0182314	0.00129924	0.000785546
Clostridiaceae	0.00479315	0.0056128	0.0024595	0.000999521	0.0036543	0.0130049	0.000554515	0.00503238	0.000505781	0.000294481	0.000883628	0.00145205	0.000926682	0.0058026	0.00157492	0.00845621	0.00736382	0.00078621	0.00498452	0.00779216	0.00521829	0.00192286	0.0559611	0.00102487	0.0195659	0.00673948	0.0010955	0.000163621	0.00572447	8.19471e-05	0.00446794	0.00517174	0.00248628	0.00761205	0.00659498	0.00143069	0.00361134	0.000558934	0.00367635	0.000190603	0.00490068	0.00397367	0.00737892	0.00555684	0.00289207	0.00227677	0.0171208	0.0154321	0.00105207
Comamonadaceae	0.000403307	0.00027115	0.000534674	0.000140778	0.00025811	0.000412178	2.99738e-05	0	4.21484e-05	4.20687e-05	1.40258e-05	1.3962e-05	0.000138311	0.000770099	0.000157492	0.000837411	0.000860259	0.00017801	0.000543766	0.00092364	0.000121986	0.000344392	9.51488e-05	0.000191309	0.000148842	0.000722087	0.000158559	5.45405e-05	0.000756955	5.46314e-05	0.000545922	0.000700989	0.000810343	0.000834655	0.000892075	0.000555443	0.000416122	1.3308e-05	0.00082401	6.80726e-05	0.000785958	0.000767118	0.00108465	0.000375267	0.000790499	0	5.76942e-05	1.44361e-05	9.81932e-05
Coriobacteriaceae	9.30709e-05	0.00315889	0.00199166	0.000267478	0.0012498	0.000810142	0.00067441	0.000306319	0.0012504	0.000350572	0.000280517	0.000670176	1.38311e-05	0	0.0026344	1.64198e-05	0	0.000326351	1.51046e-05	1.67935e-05	1.3554e-05	0	4.0778e-05	0.000505603	1.35311e-05	0.000165478	0.000403604	0.000545405	0.000189239	0.00101068	1.43664e-05	0.000342706	0.000184169	0.000166931	4.77897e-05	0.00107722	0.00108489	1.3308e-05	0.00843026	5.44581e-05	0.000308219	0.000429586	0	0	0.00173524	0.00110166	0.00271163	0.0016024	4.20828e-05
Coriobacteriales_Incertae_Sedis	0.00017063	0.00126085	1.33668e-05	0.0003801	0	4.26391e-05	0.000569502	1.45866e-05	1.40495e-05	1.40229e-05	2.80517e-05	0.000195468	8.29864e-05	7.16371e-05	0.000515427	0	0	0.000637869	0	0	0	0.000258294	0	0.000273299	0	0.000165478	0.000302703	0	0	0.00195307	1.43664e-05	1.55775e-05	7.36675e-05	5.00793e-05	3.18598e-05	0.000269306	1.48615e-05	0	1.58464e-05	0	4.62328e-05	1.53424e-05	1.64341e-05	0.00261244	0.000115683	8.81329e-05	0.000533672	0	8.41656e-05
Corynebacteriaceae	0.00285417	0.00037961	0.000160402	2.81555e-05	0.00137206	0.00093806	2.99738e-05	0.000102106	4.21484e-05	1.40229e-05	1.40258e-05	1.3962e-05	1.38311e-05	0.00508623	1.43174e-05	0.00532002	0.00480025	0.000192844	0.00401782	0.00463499	0.000189756	0.00117667	6.79634e-05	0.000273299	0.000162373	0.00400156	0.00036036	4.09054e-05	0.00384785	4.09735e-05	0.00274398	0.00397227	0.000791926	0.00485769	0.00481083	0.000555443	0.00184282	3.99239e-05	0.000443698	6.80726e-05	0.0032363	0.0013041	0.00519318	0.0016021	0.000790499	2.93776e-05	4.32707e-05	0	0.000771518
Dermabacteraceae	0.00411063	0.000488069	5.34674e-05	0.000112622	0.00207847	0.00126496	5.99475e-05	4.37598e-05	2.8099e-05	0	1.40258e-05	0	1.38311e-05	0.00891882	0	0.00975337	0.00882626	0.000400522	0.00667623	0.00854787	0.000325296	0.0019946	4.0778e-05	0.000601257	0.000311215	0.00559617	0.00085045	1.36351e-05	0.00665489	1.36578e-05	0.00443921	0.00676065	0.00204427	0.00909774	0.00925528	0.0012792	0.00273451	3.99239e-05	0.000839857	1.36145e-05	0.00579451	0.00254683	0.00866078	0.00327637	0.00264142	2.93776e-05	1.44236e-05	4.33082e-05	0.00102402
Desulfovibrionaceae	0.00127197	0.000135575	0.00268673	0.00858744	0.000108678	0.000213195	0.000209816	0.00786219	0.0028099	0.000869419	0.000659214	0.000153582	0.00091285	5.37278e-05	0.000587014	4.92595e-05	5.16156e-05	0.000563698	1.51046e-05	5.03804e-05	9.48779e-05	0.00087533	0.000734005	0.00875922	0.000297683	0.000120348	0.00151351	0.00515408	0.000126159	0.000259499	0.000129297	0.00144871	0.000791926	0.000150238	3.18598e-05	0.000353464	0.000728213	7.98478e-05	0.000871549	0.00235531	6.16437e-05	0.000245478	3.28682e-05	0.0001299	0.00040489	0.00145419	0.00178852	0.00062075	0.000729436
Dysgonomonadaceae	7.75591e-05	0	0.000213869	5.63111e-05	0.000597729	5.68521e-05	1.49869e-05	0	1.40495e-05	0	0	0	1.38311e-05	0.000949191	2.86348e-05	0.00303767	0.00311414	5.93366e-05	0.000105732	0.0028213	8.1324e-05	8.6098e-05	1.35927e-05	0.000163979	1.35311e-05	0.000150435	0	0	0.000157699	1.36578e-05	0.000215496	0.000202508	3.68338e-05	0.00243719	9.55795e-05	3.36632e-05	0.000118892	0	1.58464e-05	0	0.000184931	1.53424e-05	0.00241582	0.000187634	0.000154244	0	0	0	2.80552e-05
Eggerthellaceae	0	0.000827007	0.000147035	0.0001267	4.07542e-05	0.00123653	1.49869e-05	0.000802264	8.42969e-05	0.000126206	0.000140258	8.3772e-05	0.000165973	0.000107456	0.00237669	0	0	0.000489527	0	0	0.00104366	0.000315693	0.000163112	0.000232304	0.00025709	1.50435e-05	0.000230631	0.000109081	0	0.0025267	2.87327e-05	1.55775e-05	0	0.000150238	3.18598e-05	0.000117821	0.00352217	0	3.16927e-05	5.44581e-05	0.000277397	1.53424e-05	0	0.000793834	5.78414e-05	8.81329e-05	0.00252412	0.000115488	5.61104e-05
Enterobacteriaceae	0.050522	0.0168926	0.258675	0.0020272	0.610036	0.0387447	0.233735	0.0143386	0.15453	0.368507	0.249772	0.259149	0.0496812	0.0828125	0.0152051	0.0726085	0.0815354	0.121358	0.0578657	0.0776529	0.0179184	0.0941195	0.00433607	0.0233397	0.0295654	0.0775942	0.0380252	0.183352	0.0666908	0.0312491	0.312526	0.0651608	0.0210137	0.0813455	0.07546	0.0171851	0.0476014	0.0656881	0.103112	0.411921	0.062368	0.0312984	0.0777005	0.0436753	0.0277639	0.00725628	0.0376599	0.0028439	0.305171
Enterococcaceae	0.00150465	0.00021692	8.0201e-05	0	0.000964517	0.000554308	0.00023979	2.91732e-05	0.00123635	5.60915e-05	0.00067324	0.000404898	0.000290452	0.00146856	0.000515427	0.00193754	0.00192698	0.000192844	0.001299	0.00178011	0.000162648	0.000789232	0	0.000191309	0.000148842	0.00156452	0.000187387	0.000231797	0.00165584	0.000163894	0.0015803	0.00144871	0.000607757	0.00175278	0.00167264	0.000218811	0.0011592	0.000146388	0.000269388	0.000163374	0.00135616	0.000536983	0.00215287	0.000909301	0.000771218	0.000102822	1.44236e-05	7.21803e-05	0.000364718
Erwiniaceae	0.0422697	0.00504338	0.00437096	0.000689811	0.00706407	0.0122374	0.00043462	0.000729331	0.000969414	0.000182298	0.00105194	0.00104715	0.0010235	0.0700253	0.00120266	0.0647105	0.071608	0.00493977	0.0525338	0.0658975	0.00449993	0.0156842	0.0005573	0.00614922	0.00270621	0.0504859	0.0136937	0.000599945	0.0555731	0.000423393	0.0244085	0.052029	0.0506464	0.0667724	0.066587	0.0307177	0.0255469	0.000465779	0.0199981	0.000408436	0.0496386	0.0443701	0.0691055	0.035073	0.0517873	0.000381909	0.000230777	0.000317593	0.00444675
Erysipelatoclostridiaceae	0.000899685	0.00719902	0.00283377	0.0126559	0.010012	0.00234515	0.00158861	0.00183791	0.00866853	5.60915e-05	0.00180933	0.00141016	0.00143843	0.000179093	0.00259145	0	3.44104e-05	0.00237346	0.00036251	6.71738e-05	0.00258881	0.00485019	0.00282728	0.00177644	0.0020026	0.000135391	0.0028973	0.00140442	0.000756955	0.00105165	0.00206876	0.000342706	0.000349921	0.00101828	0.000223019	0.00309702	0.00407205	0.00258174	0.000649701	0.000558195	0.00032363	0.000490956	9.86047e-05	0.0018619	0.000289207	0.0036722	0.00161544	0.00291608	0.00070138
Erysipelotrichaceae	0.000542913	0.000420282	0.00160402	0.00170341	0.00270336	0.0044771	0.00645935	0.000612638	0.000576029	0.000224366	0.00159895	0.00315541	0.000567074	0.000376095	0.00115971	0.000738892	0.000791439	0.0154424	0.00039272	0.000822879	0.000664146	0.0021668	0.000720412	0.00112052	0.0027874	0.00073713	0.00507387	0.000981729	0.000536176	0.00196673	0.000488457	0.00123063	0.000773509	0.000651031	0.000637196	0.019794	0.000713352	0.000479087	0.000364466	0.0106329	0.000647259	0.000460271	0.000953179	0.0020784	0.00107971	0.000587553	0.00830797	0.00515367	0.000504994
Family_XI	0.000124094	0	0	0	0	0	0	0	4.21484e-05	0	0	0	5.53243e-05	0	0.000114539	0	0	0	0	0	4.0662e-05	0	0	0	0.000148842	0	0.000720721	2.72702e-05	0	0	0	0	0	0	0	1.68316e-05	0	0	0	0.00871329	0	0	0	0	1.92805e-05	2.93776e-05	0.000375013	1.44361e-05	0
Fusobacteriaceae	0	2.7115e-05	2.67337e-05	0	0	8.52781e-05	4.49607e-05	0	2.8099e-05	4.20687e-05	0	1.3962e-05	0	0	1.43174e-05	1.64198e-05	1.72052e-05	2.96683e-05	1.51046e-05	0	0.000487944	1.43497e-05	0	1.36649e-05	0	0	2.88288e-05	2.72702e-05	1.57699e-05	1.36578e-05	1.43664e-05	1.55775e-05	0.00029467	1.66931e-05	4.77897e-05	3.36632e-05	0	0	3.16927e-05	0.00325387	3.08219e-05	0.000122739	0	0	0.000192805	0	1.44236e-05	1.44361e-05	0
Helicobacteraceae	0	5.42299e-05	0.000280704	1.40778e-05	4.07542e-05	1.4213e-05	8.99213e-05	0.000175039	5.61979e-05	4.20687e-05	2.80517e-05	0.000181506	0.000110649	0	0.000214761	0	0	0.000267015	0	1.67935e-05	4.0662e-05	0	2.71854e-05	5.46597e-05	2.70621e-05	1.50435e-05	1.44144e-05	5.45405e-05	0	4.09735e-05	2.87327e-05	1.55775e-05	9.20844e-05	5.00793e-05	0	6.73265e-05	1.48615e-05	5.32318e-05	0	6.80726e-05	1.54109e-05	6.13695e-05	0	1.44333e-05	7.71218e-05	0.000146888	5.76942e-05	0.000129924	0
Ilumatobacteraceae	1.55118e-05	0	1.33668e-05	0	1.35847e-05	1.4213e-05	0	0	0	0	0	1.3962e-05	0	0	0	0	0	1.48342e-05	4.53138e-05	0	0	7.17484e-05	0	2.73299e-05	1.35311e-05	1.50435e-05	8.64865e-05	0	1.57699e-05	1.36578e-05	7.18319e-05	1.55775e-05	0.00158385	0	4.77897e-05	0.000875244	0	0	0.000744779	0	7.70547e-05	0.000352874	0	8.66001e-05	0.00175452	0	0	0	0
Intrasporangiaceae	6.20472e-05	1.35575e-05	1.33668e-05	0	9.50932e-05	1.4213e-05	0	0	1.40495e-05	0	0	0	0	0.000161183	0	0.000180618	6.88208e-05	2.96683e-05	0.000181255	0.000218315	0	1.43497e-05	0	2.73299e-05	0	4.51304e-05	0	1.36351e-05	4.73097e-05	0	0.000114931	4.67326e-05	0.000257836	0.000317169	0.000207089	0.000168316	4.45845e-05	0	9.50781e-05	1.36145e-05	7.70547e-05	9.20542e-05	0.000312248	0.000101033	0.000212085	0	1.44236e-05	1.44361e-05	2.80552e-05
Kosmotogaceae	0.000108583	5.42299e-05	0	0	0.000203771	4.26391e-05	0	0	0	0	0	0	0	0.000465641	0	0.00146136	0.00115275	5.93366e-05	0.000226569	0.00147782	0	5.73987e-05	1.35927e-05	4.09948e-05	1.35311e-05	0.000210609	1.44144e-05	1.36351e-05	0.000205009	1.36578e-05	2.87327e-05	3.11551e-05	0	0.00105167	0.000254879	5.04948e-05	7.43075e-05	0	0	0	9.24656e-05	4.60271e-05	0.000953179	4.33e-05	0	0	0	0	2.80552e-05
Lachnospiraceae	0.0734174	0.176695	0.072622	0.153574	0.0255393	0.0848802	0.15994	0.102281	0.066721	0.114413	0.204679	0.191726	0.130054	0.0294249	0.0939938	0.00369446	0.00277004	0.171527	0.0471566	0.00448385	0.239879	0.13371	0.112792	0.181238	0.297792	0.00980835	0.158876	0.201336	0.0532391	0.237947	0.00761418	0.0649895	0.0472025	0.0250396	0.00586221	0.158268	0.0533528	0.230747	0.0739708	0.0683449	0.0359999	0.0320195	0.00221861	0.0503868	0.0391972	0.187694	0.176588	0.247882	0.0931573
Lactobacillaceae	0.243272	0.0404826	0.0142357	0.00578596	0.17273	0.0961653	0.00287748	0.00319447	0.00380741	0.00185102	0.00281919	0.00191279	0.00224063	0.360997	0.00355072	0.369512	0.369395	0.0523646	0.311487	0.370514	0.0355521	0.142148	0.00618467	0.0499863	0.0303096	0.306887	0.0934054	0.00374966	0.325443	0.0415472	0.297959	0.299244	0.347177	0.339154	0.360828	0.241264	0.182425	0.00396577	0.198824	0.00358062	0.273236	0.255374	0.372216	0.209327	0.366232	0.00243834	0.00105292	0.00147248	0.0923157
Lentimicrobiaceae	3.10236e-05	1.35575e-05	1.33668e-05	2.81555e-05	0.000203771	2.8426e-05	0	0	0	0	0	1.3962e-05	0	0.000465641	0	0.00142852	0.00135921	2.96683e-05	4.53138e-05	0.0012763	1.3554e-05	0	0	4.09948e-05	0	1.50435e-05	0	0	3.15398e-05	0	1.43664e-05	0	0	0.00108505	1.59299e-05	1.68316e-05	5.9446e-05	0	0	0	3.08219e-05	0	0.00156124	7.21667e-05	7.71218e-05	0	0	0	0
Lutispora	0	0	0	0	0.000149432	0	0	1.45866e-05	0	0	1.40258e-05	0	0	0.000411913	0	0.000623953	0.000447335	1.48342e-05	3.02092e-05	0.000419836	1.3554e-05	0	0	4.09948e-05	0	0	1.44144e-05	0	0	0	2.87327e-05	1.55775e-05	0	0.000550872	0	1.68316e-05	1.48615e-05	0	0	0	3.08219e-05	1.53424e-05	0.000542326	2.88667e-05	0	0	0	0	0
Marinifilaceae	0.00277661	0.00112527	0.000267337	0.00374469	2.71695e-05	0.00247307	0.00146871	2.91732e-05	0.008233	0.00246803	0.000154284	0.00121469	0.0114936	0.000179093	0.00607058	3.28396e-05	1.72052e-05	0.00114223	0	0.000117554	4.0662e-05	0.00830846	0.00255542	0.00661383	0.0017861	1.50435e-05	0.00142703	0.000763567	1.57699e-05	0.00184381	4.30991e-05	0.000700989	0.00180485	3.33862e-05	0.000175229	0.00208712	0.00188741	1.3308e-05	0.00112509	0.00574533	0.000261986	4.60271e-05	0	0.000230934	0.00239078	0.00290839	0.00253855	0.00179007	0.00364718
Methylophilaceae	0.00017063	8.13449e-05	0.000307437	0.000197089	0.000149432	9.94912e-05	1.49869e-05	0	5.61979e-05	1.40229e-05	2.80517e-05	0	0	8.95464e-05	0	0.000344816	0.000223667	0.000207678	0.000166151	8.39673e-05	8.1324e-05	2.86993e-05	6.79634e-05	0.000150314	8.11864e-05	6.01739e-05	5.76577e-05	9.54459e-05	7.88494e-05	2.73157e-05	5.74655e-05	0.00012462	0.000147335	0.000100159	0.000127439	1.68316e-05	0.000148615	3.99239e-05	0.000110924	8.16871e-05	0.000138698	0.000199451	0.000197209	4.33e-05	0.000134963	1.46888e-05	2.88471e-05	0	4.20828e-05
Microbacteriaceae	0.00167528	0.000203362	0.000173769	0.000154855	0.00120904	0.000668012	0.000104908	0	5.61979e-05	4.20687e-05	0	0	1.38311e-05	0.00114619	1.43174e-05	0.00325112	0.00342383	0.000133507	0.0026433	0.00322434	0.000230418	0.000975778	4.0778e-05	0.000218639	0.00012178	0.00189548	0.000389189	4.09054e-05	0.00266511	2.73157e-05	0.00229862	0.00235221	0.00187852	0.00160254	0.00342493	0.00102673	0.0012335	2.66159e-05	0.000713086	0	0.00237328	0.00142684	0.00368124	0.00118353	0.0016774	0	4.32707e-05	0	0.000462911
Micrococcaceae	0.00338158	0.000623644	0.000708442	0.000295633	0.00154866	0.00102334	0.000134882	7.29331e-05	0.000674375	4.20687e-05	0.000112207	0.000111696	0.000511749	0.00619661	0.00103085	0.00527076	0.00559169	0.00053403	0.00416887	0.00581054	0.000515052	0.00140627	0.00126412	0.000368953	0.000284152	0.00451304	0.00103784	0.000545405	0.00433672	0.00120189	0.0032468	0.00417478	0.00290987	0.00560888	0.00533652	0.0016495	0.00203602	0.000399239	0.00112509	0.000108916	0.00687328	0.00193314	0.0056369	0.00189077	0.00196661	1.46888e-05	0.000375013	8.66163e-05	0.000659297
Mitochondria	0.00680969	0.000582972	0.000147035	4.22333e-05	0.00256752	0.00149237	0.00019483	7.29331e-05	0.000182643	0.00566525	0.000126233	2.7924e-05	0.000110649	0.00816663	0.000128857	0.0112476	0.0108393	0.000771376	0.00750699	0.0109661	0.000623484	0.0023103	9.51488e-05	0.000778901	0.00063596	0.00722087	0.00165766	2.72702e-05	0.0081688	8.19471e-05	0.00543049	0.00808474	0.00681425	0.0100826	0.0105775	0.00417424	0.00371537	9.31557e-05	0.00291573	5.44581e-05	0.00679622	0.00509367	0.0103699	0.00427227	0.00715305	7.34441e-05	8.65414e-05	0.000101052	0.00124846
Monoglobaceae	4.65354e-05	0.00492137	0.00132332	0.00104175	0.000163017	0.000397965	0.00278756	0.00358831	0.00196693	0.00344963	7.01292e-05	0.00295994	0.00218531	0.000232821	0.00137447	3.28396e-05	1.72052e-05	0.000652703	0.00302092	6.71738e-05	0.00584177	0.00190851	0.0116897	0.00446843	0.00250325	7.52174e-05	0.00144144	4.09054e-05	0.000205009	0.00184381	5.74655e-05	0.000171353	0.000368338	0.000383941	4.77897e-05	0.0012792	0.000579598	0.00312737	9.50781e-05	0.000544581	0.000138698	0.000721091	0	0.00619191	0.000674816	0.00208581	0.00387994	0.000461954	0.00100999
Moraxellaceae	0.00178386	0.000474512	0.000147035	1.40778e-05	0.000489051	0.000596947	7.49344e-05	5.83465e-05	0.000126445	0.000112183	0.000210388	5.5848e-05	0.000110649	0.00182675	0.000171809	0.00295557	0.0029765	0.000415356	0.00226569	0.00251902	0.000311742	0.000674435	5.43707e-05	0.000300629	0.00012178	0.00233174	0.00061982	5.45405e-05	0.00247587	2.73157e-05	0.00172396	0.00204066	0.00224686	0.00275436	0.00297889	0.0012792	0.00121864	1.3308e-05	0.000934935	2.7229e-05	0.00204965	0.0019178	0.00248155	0.00145777	0.00221725	0.000161577	0.000129812	5.77442e-05	0.00131859
Morganellaceae	0.000232677	4.06725e-05	4.01005e-05	1.40778e-05	0.000108678	9.94912e-05	1.49869e-05	2.91732e-05	2.8099e-05	2.80458e-05	5.61033e-05	1.3962e-05	0	0.000340276	2.86348e-05	0.000377656	0.000412925	4.45025e-05	0.00019636	0.00038625	0	0.000129147	1.35927e-05	2.73299e-05	1.35311e-05	0.000240696	0.000100901	1.36351e-05	0.000362707	1.36578e-05	0.000172396	0.000373861	0	0.000367248	0.000334528	0	0.000133753	1.3308e-05	0	1.36145e-05	0.000308219	0.000245478	0.000460155	0.000158767	7.71218e-05	2.93776e-05	0	1.44361e-05	8.41656e-05
Muribaculaceae	0.000465354	0.000176247	0.00050794	0	0.000149432	0.000127917	2.99738e-05	0.00013128	4.21484e-05	4.20687e-05	0.00197764	0.00013962	0.000110649	0.000322367	0.0212757	0.000788151	0.000602182	0.000415356	0.000226569	0.000822879	6.777e-05	5.73987e-05	0.000462151	0.000300629	0.000324746	0.00135391	0.00152793	0.112981	0.000678105	0.00513535	0.00015803	0.00143313	0.000239419	0.000884734	0.000334528	0.000151485	0.0179527	0.000119772	0.00017431	8.16871e-05	0.00228082	0.000230135	0.000788838	0.000101033	0.000269926	2.93776e-05	0.00539441	0.000129924	8.41656e-05
Neisseriaceae	4.65354e-05	0	1.33668e-05	2.81555e-05	0	2.8426e-05	0	0	0	0	1.40258e-05	0	0	0	1.43174e-05	6.56793e-05	0	1.48342e-05	0	0	0	0	0	0	0	0	0	0	0	0	0	0	3.68338e-05	0	3.18598e-05	0	0	1.3308e-05	0	0	0	3.06847e-05	3.28682e-05	1.44333e-05	0	0	0	0	0
Nitrospiraceae	6.20472e-05	0	1.33668e-05	0	0	2.8426e-05	1.49869e-05	1.45866e-05	0	0	0	0	0	1.79093e-05	0	1.64198e-05	0	0	0	0	0	1.43497e-05	0	2.73299e-05	0	3.0087e-05	7.20721e-05	4.09054e-05	1.57699e-05	0	2.87327e-05	0	0.00125235	3.33862e-05	0	0.000858412	5.9446e-05	0	0.000602161	1.36145e-05	3.08219e-05	0.00026082	0	7.21667e-05	0.00156172	0	0	0	1.40276e-05
Nocardiaceae	0.00575488	0.000664317	0.000106935	0.0001267	0.00270336	0.00173399	5.99475e-05	5.83465e-05	0	1.40229e-05	1.40258e-05	2.7924e-05	1.38311e-05	0.00933073	4.29523e-05	0.0121999	0.012663	0.000904883	0.00839816	0.0122592	0.00047439	0.00301343	9.51488e-05	0.000792566	0.000405932	0.00837922	0.00147027	2.72702e-05	0.00969848	8.19471e-05	0.00613444	0.00867669	0.00550665	0.0112011	0.0116766	0.00233959	0.00399774	6.65398e-05	0.00213926	6.80726e-05	0.0077517	0.00523175	0.0120462	0.00430114	0.00572629	2.93776e-05	2.88471e-05	4.33082e-05	0.00171137
Nostocaceae	4.65354e-05	0	0.000147035	0	0.000122263	4.26391e-05	7.49344e-05	0	1.40495e-05	0.000967579	4.20775e-05	0	1.38311e-05	0.000125365	1.43174e-05	0.000180618	0.000103231	1.48342e-05	0.000135941	0.000268695	4.0662e-05	1.43497e-05	1.35927e-05	4.09948e-05	0.000906582	0.000150435	0	0	0.000410017	5.46314e-05	2.87327e-05	0.000171353	0.000110501	0.000133545	0.000143369	3.36632e-05	5.9446e-05	0	4.75391e-05	0	7.70547e-05	9.20542e-05	0.000197209	4.33e-05	3.85609e-05	2.93776e-05	2.88471e-05	2.88721e-05	1.40276e-05
Oscillospiraceae	0.0218096	0.0051654	0.00299417	0.027691	0.000733576	0.043634	0.0269914	0.0229739	0.0241792	0.0209362	0.000939731	0.0312888	0.0379801	0.00458477	0.0706278	0.000788151	0.000602182	0.0695722	0.000438033	0.000940434	0.00287345	0.0413414	0.0195327	0.0375239	0.0130304	0.00130878	0.0520649	0.0101582	0.000583486	0.144828	0.000660853	0.00306877	0.0125787	0.00103497	0.00272401	0.0179593	0.0635032	0.000332699	0.00511837	0.02889	0.00608732	0.00121205	0.000361551	0.00564344	0.00379825	0.0229146	0.0243325	0.0103651	0.0112642
Oxalobacteraceae	0.000263701	4.06725e-05	0.000160402	0.000661655	5.4339e-05	0.000994912	0.000104908	1.45866e-05	0.000505781	0.000434709	1.40258e-05	0.000181506	0.000318115	0.000268639	2.86348e-05	0.000706052	0.000636592	0.000148342	0.00055887	0.000772499	6.777e-05	0.000301343	0.000108741	0.000355288	6.76553e-05	0.000451304	0.000288288	4.09054e-05	0.000520406	0.00122921	0.000344793	0.000529636	0.00058934	0.000600952	0.000716846	0.000319801	0.000445845	5.32318e-05	0.000808164	6.80726e-05	0.000585615	0.000383559	0.000706667	0.000230934	0.000655535	1.46888e-05	1.44236e-05	0	5.61104e-05
Paenibacillaceae	0.000139606	0	0	0	0.000122263	5.68521e-05	0	0	0	0	0	0	0	0.000197002	0	0.000328396	0.000172052	5.93366e-05	0.000256778	0.000201521	5.4216e-05	0.000100448	1.35927e-05	1.36649e-05	2.70621e-05	0.000165478	2.88288e-05	0	0.000236548	0	0.000244228	0.000249241	0.000460422	0.000133545	0.000270808	0.000319801	0.000118892	0	9.50781e-05	0	0.000184931	0.000168766	0.000213644	0.000202067	0.000520572	0	0	0	5.61104e-05
Pasteurellaceae	0.000806614	0.00340293	0.00076191	1.40778e-05	0	0.000909634	4.49607e-05	0.000189626	4.21484e-05	1.40229e-05	1.40258e-05	5.5848e-05	1.38311e-05	1.79093e-05	0.00121698	0.000131359	6.88208e-05	0.0194327	0.000120837	8.39673e-05	0.000149094	2.86993e-05	0.0170316	9.56546e-05	4.05932e-05	0.000165478	5.76577e-05	2.72702e-05	0.00187662	6.82892e-05	0	0.000638679	0.000349921	1.66931e-05	6.37196e-05	0	5.9446e-05	0.000346007	7.92318e-05	8.16871e-05	0.0019726	0.000705749	0	0.000144333	0.00044345	0.000190955	0.000634637	0.00701592	1.40276e-05
Peptostreptococcaceae	0.00102378	0.00543655	0.0138614	0.000225244	0.00210563	0.00933796	0.000179843	0.00535329	0.000140495	0.000182298	0.000322594	0.00167544	0.000373439	0.0015402	0.00349345	0.000459755	0.00043013	0.00157242	0.000468243	0.000520597	0.00269724	0.000186546	0.00914787	0.000204974	0.00350455	0.000481391	0.000245045	6.81756e-05	0.00134044	0.00125652	0.000416625	0.000825609	0.0014181	0.00143561	0.000350458	0.000925739	0.00196172	0.000199619	0.000887396	6.80726e-05	0.00104794	0.00279231	0.000608063	0.00749091	0.00173524	0.00574333	0.00993783	0.0117654	0.00110818
Phormidiaceae	0	0	0	0	0.000122263	0	0	0	1.40495e-05	0	0	1.3962e-05	1.38311e-05	0.000447732	2.86348e-05	0.000837411	0.000774234	1.48342e-05	0.000105732	0.000604564	4.0662e-05	4.3049e-05	0	4.09948e-05	2.70621e-05	4.51304e-05	4.32432e-05	1.36351e-05	6.30795e-05	0	0.000114931	6.23101e-05	0.000313087	0.000734496	3.18598e-05	0.00010099	0	0	9.50781e-05	0	0.000107877	0.000429586	0.000772404	0	0.000501292	0	0	0	2.80552e-05
Porphyromonadaceae	7.75591e-05	0	0	0	0	0	0	0	5.61979e-05	0	0	0	4.14932e-05	0	0	0	0	1.48342e-05	0	0	1.3554e-05	0	0	0	0.00012178	0	0.000259459	0	0	0	0	0	5.52507e-05	0	9.55795e-05	1.68316e-05	0	0	3.16927e-05	0.00614015	0	3.06847e-05	0	0	9.64023e-05	1.46888e-05	0.00040386	4.33082e-05	0
Prevotellaceae	0.0974142	0.00233189	0.00304764	0.228792	0.00273053	0.207212	0.00506557	0.0203337	0.0157916	0.00100965	0.0252605	0.0490904	0.000760709	0.00857854	0.0841005	0.00139568	0.00125598	0.168783	0.000694812	0.00172973	0.00013554	0.00625646	0.00829154	0.000382618	0.000649491	0.106718	0.0100468	0.0271066	0.000914653	0.0228905	0.000430991	0.0290521	0.0425062	0.0164928	0.00178415	0.00801185	0.0219801	0.000332699	0.00491237	0.0683313	0.0685632	0.143773	0.00164341	0.0019052	0.0125709	0.000411287	0.00960609	0.000389773	9.81932e-05
Promicromonosporaceae	0.000155118	4.06725e-05	1.33668e-05	4.22333e-05	0.000135847	0.000113704	1.49869e-05	0	0	2.80458e-05	0	0	0	0.000626825	0	0.000492595	0.000395719	5.93366e-05	0.000332301	0.000470217	2.7108e-05	0.000129147	0	9.56546e-05	4.05932e-05	0.000330956	5.76577e-05	0	0.000346937	0	0.000258595	0.000327128	0.000313087	0.000450714	0.000398248	0.000168316	8.91689e-05	1.3308e-05	7.92318e-05	0	0.000477739	0.000245478	0.000443721	0.000202067	0.000173524	1.46888e-05	0	0	7.0138e-05
Propionibacteriaceae	0.000232677	0	1.33668e-05	0	4.07542e-05	2.8426e-05	1.49869e-05	0	0	0	0	0	0	7.16371e-05	0	0.000229878	0.000258078	1.48342e-05	0.000241674	0.000352663	5.4216e-05	1.43497e-05	0	0	0	0.000285826	0	0	0.000236548	0	0.00015803	0.00018693	3.68338e-05	0.000116852	0.000366388	3.36632e-05	4.45845e-05	0	1.58464e-05	0	0.000154109	4.60271e-05	0.000361551	8.66001e-05	0	0	0	0	1.40276e-05
Pseudomonadaceae	0.0111685	0.00122017	0.000454473	0.000239322	0.0036543	0.00369539	0.000104908	0.000204213	8.42969e-05	5.60915e-05	9.81808e-05	0	5.53243e-05	0.0134857	0.000128857	0.0185216	0.0173084	0.00148342	0.013866	0.0176835	0.00147739	0.0042188	0.000108741	0.00177644	0.00075774	0.013825	0.00373333	8.18107e-05	0.014871	0.000150236	0.00936687	0.0142379	0.0163358	0.0191303	0.0185902	0.0105871	0.00628641	0.000173003	0.00716255	0.000108916	0.0130376	0.0127035	0.0173873	0.00857341	0.0169861	0.000146888	2.88471e-05	2.88721e-05	0.00175345
Pseudonocardiaceae	0.00110134	0.000149132	4.01005e-05	1.40778e-05	0.000652068	0.000270047	1.49869e-05	1.45866e-05	2.8099e-05	2.80458e-05	4.20775e-05	1.3962e-05	0	0.00247148	2.86348e-05	0.00256149	0.00184096	0.000103839	0.00176724	0.00225032	0.000149094	0.000774882	1.35927e-05	0.000259634	5.41243e-05	0.00206096	0.000605405	2.72702e-05	0.00181354	0	0.00139354	0.00185373	0.00221003	0.00196979	0.00235763	0.00138019	0.000951135	2.66159e-05	0.00099832	2.7229e-05	0.00132534	0.00162629	0.00264589	0.00102477	0.00235222	0	0	1.44361e-05	0.000238469
Rhizobiaceae	0.00169079	0.000135575	0.000200503	5.63111e-05	0.000679237	0.000639586	1.49869e-05	0	5.61979e-05	5.60915e-05	5.61033e-05	0	2.76621e-05	0.00238193	0.000100222	0.00287347	0.00285606	0.000296683	0.00191828	0.00310679	0.000257526	0.000617036	6.79634e-05	0.000286964	4.05932e-05	0.00192556	0.000518919	9.54459e-05	0.00250741	1.36578e-05	0.00143664	0.00172911	0.00219161	0.00270428	0.002501	0.00158217	0.00118892	1.3308e-05	0.00099832	1.36145e-05	0.00184931	0.00213259	0.00322109	0.0012557	0.0032584	5.87553e-05	1.44236e-05	2.88721e-05	0.000168331
Rhodobacteraceae	0.000372283	4.06725e-05	8.0201e-05	5.63111e-05	0.000176602	0.000184769	0	1.45866e-05	1.40495e-05	2.80458e-05	5.61033e-05	0	0	0.000447732	2.86348e-05	0.000656793	0.000671002	4.45025e-05	0.000498452	0.000570978	1.3554e-05	0.000200895	1.35927e-05	5.46597e-05	2.70621e-05	0.000376087	1.44144e-05	1.36351e-05	0.000346937	0	0.000172396	0.000420594	0.000515673	0.000634338	0.000509757	0.000134653	0.000178338	0	4.75391e-05	1.36145e-05	0.000539383	0.000214793	0.000673799	0.0003031	0.000269926	1.46888e-05	0	1.44361e-05	2.80552e-05
Rikenellaceae	0.0085315	0.00535521	0.00080201	0.00223836	0.000217356	0.00980699	0.00824279	0.00571795	0.0335502	0.0366558	0.000476878	0.0145903	0.0812852	0.00188047	0.0125421	0.000213458	0	0.00339702	0.000589079	0.000319076	9.48779e-05	0.0254133	0.00453996	0.0410631	0.0225563	7.52174e-05	0.00507387	0.00617671	6.30795e-05	0.0287088	0.000287327	0.0056858	0.0115474	0.000200317	0.000844285	0.019491	0.0194834	0.000146388	0.0162108	0.0326612	0.00335958	0.000552325	4.93024e-05	0.000447434	0.00657463	0.016804	0.029525	0.0384577	0.0136068
Ruminococcaceae	0.0796376	0.298251	0.0851601	0.231636	0.00464598	0.226669	0.244271	0.421261	0.285556	0.143987	0.0760481	0.172403	0.356883	0.0621452	0.277271	0.00362878	0.00175493	0.164348	0.0830904	0.00443347	0.402825	0.135877	0.2673	0.207434	0.17972	0.0339531	0.154681	0.0783202	0.0667382	0.211956	0.00583275	0.0576369	0.0434823	0.0238878	0.00790123	0.119067	0.0987843	0.0826957	0.159383	0.0507277	0.0455393	0.0659875	0.000805272	0.354324	0.0414915	0.251061	0.344204	0.275541	0.160322
Saccharimonadaceae	0	0.000135575	0.000160402	7.03888e-05	0.000393958	5.68521e-05	0	0.000102106	2.8099e-05	2.80458e-05	0.000392723	4.1886e-05	1.38311e-05	0	0.000100222	0	0	0.000103839	0	0	0.000718362	5.73987e-05	1.35927e-05	8.19896e-05	0.000108249	1.50435e-05	5.76577e-05	0.000422689	1.57699e-05	9.56049e-05	0.00015803	7.78877e-05	0.000110501	6.67724e-05	0	1.68316e-05	5.9446e-05	0.000412547	0	2.7229e-05	3.08219e-05	6.13695e-05	0	0.000404134	0.000115683	2.93776e-05	0.000187506	4.33082e-05	1.40276e-05
Selenomonadaceae	0.000837638	0.0975597	0.358312	0.0411352	0.000176602	0.000113704	0.000164856	4.37598e-05	2.8099e-05	0.000126206	0.000589085	0.000530556	0.000525581	0.000214911	0.00270599	0.000246297	5.16156e-05	0.000904883	6.04184e-05	0.00038625	0.000189756	1.43497e-05	0.000326224	0.000573927	0.000500649	0.0109667	0.195171	0.120316	0.000473097	0.000942391	0.00103438	0.00116832	0.00104976	0.000100159	7.96495e-05	0.000134653	2.9723e-05	0.000266159	7.92318e-05	9.53016e-05	0.0283407	0.154758	4.93024e-05	0.000202067	0.000154244	0.0260727	8.65414e-05	0.000101052	5.61104e-05
Sphingobacteriaceae	0.00322646	0.000311822	6.68342e-05	0	0.00122263	0.00061116	4.49607e-05	4.37598e-05	1.40495e-05	1.40229e-05	1.40258e-05	0	0	0.00211329	1.43174e-05	0.00653509	0.00633151	0.000311517	0.00418397	0.00705325	0.00033885	0.00113362	4.0778e-05	0.000368953	0.000135311	0.00475374	0.00074955	2.72702e-05	0.00533022	5.46314e-05	0.00300257	0.00433056	0.00217319	0.0062933	0.006818	0.0012792	0.00164963	1.3308e-05	0.000728932	1.36145e-05	0.00429965	0.00223999	0.00701737	0.0026413	0.00200517	0	4.32707e-05	2.88721e-05	0.000785546
Sphingomonadaceae	0.0015822	0.000257592	0.000467839	0.000168933	0.000855839	0.000397965	4.49607e-05	5.83465e-05	8.42969e-05	7.01144e-05	7.01292e-05	2.7924e-05	5.53243e-05	0.00288339	0.000128857	0.00315261	0.00337222	0.000400522	0.00193339	0.00356021	0.000298188	0.000530938	0.000285446	0.000450943	0.00025709	0.0019707	0.000677477	0.0005045	0.00252318	0.000273157	0.00147974	0.00179142	0.00279937	0.00332193	0.0026125	0.00185148	0.00101058	0.000106464	0.00133109	0.000176989	0.00208048	0.00174903	0.00350047	0.0011258	0.00267998	0.000176266	0.000100965	5.77442e-05	0.000378745
Spirosomaceae	0.000248189	0	0	0	6.79237e-05	0.000170556	1.49869e-05	0	0	0	0	0	1.38311e-05	0.000214911	1.43174e-05	0.000426915	0.000378514	1.48342e-05	0.000226569	0.00038625	2.7108e-05	2.86993e-05	0	4.09948e-05	0	0.000376087	0.00012973	1.36351e-05	0.000283858	0	0.000244228	0.000451749	0.000368338	0.000367248	0.000589407	0.000117821	8.91689e-05	0	4.75391e-05	0	9.24656e-05	0.000291505	0.000295814	0.000144333	0.000385609	0	0	0	2.80552e-05
Staphylococcaceae	0.0509563	0.00711768	0.00122975	0.000844666	0.0320192	0.0184485	0.000719371	0.000466772	0.000351237	0.000210343	0.00016831	0.000195468	0.000373439	0.0562888	0.000372253	0.0847427	0.0819483	0.0065567	0.0712031	0.0833627	0.00548937	0.0268626	0.000598078	0.00870456	0.00445172	0.0726299	0.00954234	0.000709026	0.0744812	0.000450709	0.0604681	0.0689773	0.0208111	0.073266	0.0827718	0.0137851	0.0337059	0.000665398	0.0101892	0.000599039	0.0604417	0.02711	0.0851945	0.0420155	0.0209964	0.000514109	0.000216353	0.000216541	0.0164263
Streptococcaceae	0.0350722	0.00578905	0.0054403	0.000999521	0.0165598	0.0110009	0.000824279	0.00309236	0.0222965	0.000280458	0.00360464	0.00174525	0.0026279	0.0265415	0.00873362	0.0380776	0.033791	0.00806978	0.0276716	0.0340739	0.0120088	0.010504	0.00391469	0.00649084	0.00462763	0.0303427	0.00730811	0.0025634	0.0299155	0.0157748	0.0246671	0.0270582	0.0329846	0.0313163	0.0344245	0.0144752	0.0155451	0.00948858	0.0105537	0.0492846	0.0448304	0.0187637	0.0339693	0.0157179	0.0190684	0.00107228	0.00142793	0.00269954	0.00697172
Streptomycetaceae	0.000791102	0.00010846	5.34674e-05	1.40778e-05	0.000448296	0.00028426	1.49869e-05	1.45866e-05	2.8099e-05	2.80458e-05	1.40258e-05	0	0	0.00182675	2.86348e-05	0.00200322	0.00182375	7.41708e-05	0.00148025	0.00189766	9.48779e-05	0.000358742	0	0.000136649	6.76553e-05	0.00139904	0.000172973	0	0.000851574	1.36578e-05	0.000933814	0.00107485	0.00139968	0.00181955	0.0015452	0.00109406	0.000639044	0	0.000808164	4.08436e-05	0.00121746	0.00084383	0.00180775	0.000822701	0.00171596	0	0	0	0.000196386
Sutterellaceae	0.000620472	0.00196584	0.0197696	0.0001267	0.000407542	0.00299895	0.00118396	0.00441974	0.017042	0.0108537	0.0437185	0.00217807	0.00211615	8.95464e-05	0.000701553	4.92595e-05	3.44104e-05	0.00103839	0.000725021	0.000201521	0.00116564	0.00119102	0.0120975	0.000901886	0.0228269	0.000902609	0.000144144	0.0246114	0.0014666	0.000396077	0.000344793	0.00247683	0.000957678	0.000200317	9.55795e-05	0.00180098	0.000193199	0	0.0017431	0.00532328	9.24656e-05	0.000567668	8.21706e-05	0.000837134	0.00250646	0.0162311	0.00181737	0.0132956	0.000729436
Synergistaceae	0	0	0.000441106	1.40778e-05	0.000122263	0	4.49607e-05	0	8.42969e-05	4.20687e-05	5.61033e-05	1.3962e-05	0	0.000537278	2.86348e-05	0.000509014	0.000808644	1.48342e-05	1.51046e-05	0.00048701	4.0662e-05	0.000330042	0	0.00243236	0	3.0087e-05	0.000158559	0	0	1.36578e-05	2.87327e-05	0	1.84169e-05	0.000767882	3.18598e-05	0	0.000535014	0	0	0.000762413	0	0	0.000493024	0	0	0.000528797	0	2.88721e-05	0
Tannerellaceae	0.00434331	0.0079718	0.00255307	0.00525101	0.000475466	0.00994912	0.0121843	0.0204358	0.0135578	0.0106854	0.0302116	0.00294598	0.0122405	0.000967101	0.0204596	0.000476175	0.000189257	0.00753575	0.00827732	0.00048701	0.000108432	0.0227586	0.00618467	0.0197595	0.0577912	0.00030087	0.0252108	0.00350423	0.000520406	0.00290912	0.004784	0.00376976	0.00445689	0.0004841	0.0010673	0.00903858	0.015129	0.0919447	0.0199506	0.0660985	0.00426883	0.000567668	0.000443721	0.00343514	0.0140362	0.0102234	0.0180727	0.0382555	0.0093985
Thermoactinomycetaceae	0.00148913	0.000135575	4.01005e-05	5.63111e-05	0.00101886	0.000525882	1.49869e-05	2.91732e-05	1.40495e-05	0	0	0	1.38311e-05	0.00274012	1.43174e-05	0.00305409	0.0029937	0.000252181	0.00202402	0.00310679	0.000176202	0.000904029	0	0.000423613	5.41243e-05	0.0026627	0.000245045	1.36351e-05	0.00208162	2.73157e-05	0.00202566	0.0024301	0.000755092	0.00263751	0.00296296	0.000454454	0.000906551	1.3308e-05	0.000380312	2.7229e-05	0.00198801	0.000721091	0.0034676	0.001299	0.000674816	1.46888e-05	0	2.88721e-05	0.000462911
UCG_010	0.000186142	0.000338937	0.000133668	0.0043078	1.35847e-05	0.000170556	0.000404646	0.000466772	1.40495e-05	0	1.40258e-05	0.0016894	5.53243e-05	0.000107456	0.00479633	1.64198e-05	1.72052e-05	0.00140924	0	1.67935e-05	0	7.17484e-05	0.00183501	0.00121618	4.05932e-05	0	0.00276757	1.36351e-05	0	0.00131115	1.43664e-05	3.11551e-05	0.000147335	5.00793e-05	3.18598e-05	0.000942571	0.00796576	0	3.16927e-05	1.36145e-05	4.62328e-05	0.000122739	3.28682e-05	0.000331967	0	0.000176266	0.000822143	4.33082e-05	0.000364718
Veillonellaceae	0.00788	0.0331345	0.002259	0.0580567	0.000950932	0.0335285	0.00067441	0.034191	0.0616632	0.000659076	0.000799473	0.00131243	0.0477725	0.00564142	0.100594	0.000328396	0.000120436	0.060731	0.00501473	0.000403043	0.056737	0.0160142	0.0399489	0.000628587	0.0556803	0.000541565	0.0378523	0.031129	0.000662335	0.064424	0.0157455	0.00222759	0.0189694	0.00519155	0.000111509	0.00121188	0.0630424	0.209041	0.00139448	0.0169501	0.00952396	0.00174903	0.000115039	0.0003897	0.00131107	0.000323154	0.00197603	0.00984539	0.00319829
Weeksellaceae	0.00034126	2.7115e-05	0	0	0.000271695	5.68521e-05	0	0	1.40495e-05	0	1.40258e-05	0	0	0.000268639	4.29523e-05	0.00095235	0.00089467	8.90049e-05	0.000679707	0.000604564	4.0662e-05	0.000157846	0	0	5.41243e-05	0.000752174	8.64865e-05	1.36351e-05	0.000536176	0	0.000488457	0.000763299	0.000239419	0.000817962	0.000923935	0.000168316	0.000341814	1.3308e-05	0.000126771	0	0.000523972	0.000276163	0.000723101	0.0002165	0.000134963	0	0	0	0.000140276
Woeseiaceae	9.30709e-05	2.7115e-05	1.33668e-05	2.81555e-05	1.35847e-05	5.68521e-05	0	2.91732e-05	1.40495e-05	0	0	0	0	0.000125365	0	4.92595e-05	0	4.45025e-05	9.06276e-05	0	1.3554e-05	0.000100448	0	1.36649e-05	1.35311e-05	0.000120348	0.000317117	0	0.000141929	0	0.000143664	4.67326e-05	0.00651958	0.000100159	0.000143369	0.00400592	5.9446e-05	2.66159e-05	0.00291573	1.36145e-05	0.000184931	0.00184108	0	0.000404134	0.00721089	0	0	0	2.80552e-05
Xanthobacteraceae	0.000108583	5.42299e-05	0.000147035	7.03888e-05	5.4339e-05	0.000127917	4.49607e-05	2.91732e-05	5.61979e-05	8.41373e-05	8.4155e-05	2.7924e-05	0.00012448	0.000214911	7.15871e-05	0.000213458	0.000172052	8.90049e-05	9.06276e-05	0.000184728	5.4216e-05	4.3049e-05	1.35927e-05	5.46597e-05	1.35311e-05	9.02609e-05	4.32432e-05	2.72702e-05	0.000157699	2.73157e-05	0.000244228	0.000109043	0.000663008	0.00026709	0.000175229	0.000488117	0.000133753	1.3308e-05	0.000285234	0	0.000154109	0.000214793	0.000131473	4.33e-05	0.000829059	0	4.32707e-05	1.44361e-05	2.80552e-05
Xanthomonadaceae	0.00206307	0.00021692	6.68342e-05	4.22333e-05	0.000719991	0.000540095	0	1.45866e-05	7.02474e-05	5.60915e-05	4.20775e-05	0	0	0.00239984	1.43174e-05	0.00387508	0.00380235	0.000192844	0.00250736	0.00448385	0.000243972	0.000918379	2.71854e-05	0.000341623	6.76553e-05	0.00239191	0.000418018	1.36351e-05	0.00299628	1.36578e-05	0.00186763	0.00286627	0.00184169	0.00377264	0.0035683	0.00126237	0.00124837	5.32318e-05	0.000808164	1.36145e-05	0.0029589	0.00177971	0.00373055	0.00111137	0.00219797	1.46888e-05	0	4.33082e-05	0.000364718
Yersiniaceae	0.00549118	0.000650759	0.000200503	7.03888e-05	0.000964517	0.0016345	8.99213e-05	0.000102106	7.02474e-05	2.80458e-05	2.80517e-05	2.7924e-05	2.76621e-05	0.00897255	1.43174e-05	0.00820991	0.0092736	0.000682371	0.00628351	0.00985776	0.000948779	0.00251119	9.51488e-05	0.000901886	0.000419463	0.00636339	0.00167207	1.36351e-05	0.00738031	6.82892e-05	0.00372089	0.00708778	0.0054514	0.00921459	0.00922342	0.00407325	0.00334384	3.99239e-05	0.00231357	6.80726e-05	0.00668834	0.00501695	0.00946606	0.00457537	0.00603478	7.34441e-05	2.88471e-05	5.77442e-05	0.000687353
[Eubacterium]_coprostanoligenes_group	0.000620472	0.00349783	0.000788644	0.00630684	0.000203771	0.00531567	0.00947171	0.00635976	0.000238841	0.00368802	0.000224413	0.00770702	0.014495	0.00197002	0.0254993	0.000262717	0.000189257	0.00541447	0.000211464	0.000654945	0.00398487	0.00342957	0.00723131	0.0207434	0.00611604	0.000361043	0.0298234	0.000259067	0.000252318	0.0346363	0.000287327	0.00375419	0.00248628	0.000467407	0.00323377	0.0132128	0.0311497	0.000186311	0.00316927	0.00329471	0.000215753	0.000782461	0.000115039	0.0119219	0.00726873	0.00287901	0.0357849	0.0241804	0.0247447
unclassified_Bacilli	0.0541362	0.00803959	0.00104261	0.000915055	0.0343015	0.0198698	0.000374672	0.000539705	0.000140495	0.00019632	5.61033e-05	9.7734e-05	9.68175e-05	0.0644197	0.000214761	0.0894552	0.0911875	0.0090785	0.0740579	0.0881153	0.00646525	0.027207	0.000475744	0.00937415	0.00595367	0.0726149	0.0209153	0.000599945	0.0782817	0.000437051	0.0605399	0.0691643	0.0688607	0.0766714	0.0854958	0.0430384	0.0391006	0.000771862	0.0362089	0.00042205	0.0632773	0.0559996	0.0925241	0.0521044	0.0682335	0.000470042	0.000173083	0.000259849	0.0174223
unclassified_Bacteria	0.0195914	0.00154555	0.000441106	0.000295633	0.00667011	0.00459081	0.000299738	0.000175039	0.00054793	0.0290975	0.000224413	9.7734e-05	8.29864e-05	0.0185719	0.000257714	0.0311156	0.0362857	0.00194327	0.0233215	0.0332678	0.00158582	0.0067874	0.000244668	0.00170812	0.00150195	0.0219635	0.0049009	0.000177257	0.0284173	0.00031413	0.0137917	0.0259989	0.0161148	0.0279276	0.0321147	0.0101663	0.0102544	0.000199619	0.0076221	0.000190603	0.022238	0.0137621	0.0322438	0.013957	0.0190298	0.000161577	0.000274048	0.000346465	0.00398384
unclassified_Bacteroidales	1.55118e-05	0	0	0	0	0	0.00043462	0	2.8099e-05	1.40229e-05	0	1.3962e-05	0	0	0	1.64198e-05	0	0.00998339	0	0	0	0	2.71854e-05	1.36649e-05	1.35311e-05	1.50435e-05	2.88288e-05	0	4.73097e-05	0.00438417	1.43664e-05	0	0.00263361	1.66931e-05	0	1.68316e-05	0.00994234	0	0.000665547	0	0	0	0	0	1.92805e-05	0	0	0	1.40276e-05
unclassified_Bacteroidia	3.10236e-05	6.77874e-05	0	0.00123884	1.35847e-05	0	1.49869e-05	0	0	9.81602e-05	4.20775e-05	0	0	0	0	1.64198e-05	1.72052e-05	1.48342e-05	0	0	0	0.000286993	1.35927e-05	0.000423613	0	0	0.000432432	0	0	0	0	0	0	0	0	1.68316e-05	5.9446e-05	1.3308e-05	1.58464e-05	0	0	1.53424e-05	0	0	0	8.81329e-05	1.44236e-05	0	0
unclassified_Clostridia_UCG_014	0.00442087	0.00581616	0.000748543	0.0432328	0.00025811	0.00464766	0.00530536	0.0057763	0.000337188	0.0204173	0.000182336	0.035631	0.0147577	0.00216702	0.0211611	0.000246297	0.000137642	0.00462826	0.000120837	0.000403043	0.00767156	0.00150672	0.0475336	0.00844493	0.000162373	0.000120348	0.00377658	8.18107e-05	4.73097e-05	0.029979	0.000100565	0.00426825	0.000791926	0.000367248	0.00592593	0.0286306	0.049459	6.65398e-05	0.000475391	0.00042205	0.00214212	0.000567668	9.86047e-05	0.00391144	0.000520572	0.0403502	0.0025097	0.00857502	4.20828e-05
unclassified_Cyanobacteriales	0.000573937	0.000122017	0.000387638	1.40778e-05	0.000421127	0.000213195	0.00019483	0.000116693	0.000379336	0.00549697	0.000406749	0.000153582	0.000179804	0.000519369	0.00038657	0.00106729	0.00130759	0.000252181	0.000649498	0.00104119	0.000108432	0.000315693	8.15561e-05	9.56546e-05	6.76553e-05	0.000481391	0.000115315	1.36351e-05	0.00118274	9.56049e-05	0.000531556	0.000996962	0.000773509	0.000984893	0.00105137	0.000403959	0.000490429	1.3308e-05	0.000380312	5.44581e-05	0.000801368	0.000613695	0.00115039	0.000562901	0.000674816	0.000205643	0.000187506	7.21803e-05	0.000140276
unclassified_Enterobacterales	0.00255945	0.000664317	0.00163075	4.22333e-05	0.000502635	0.000781716	0.000284751	7.29331e-05	0.000983464	0.00019632	8.4155e-05	6.981e-05	4.14932e-05	0.00419077	0.000186126	0.00371088	0.00418086	0.00136474	0.00270372	0.00401364	0.000379512	0.00114797	1.35927e-05	0.000259634	0.000175904	0.00270783	0.000735135	0.00565858	0.00332745	8.19471e-05	0.0015372	0.00280396	0.00244945	0.00375595	0.00360016	0.00146435	0.00170907	0.000106464	0.00115678	0.000381207	0.00303595	0.00219396	0.00369768	0.00206397	0.0123009	5.87553e-05	4.32707e-05	2.88721e-05	0.000378745
unclassified_RF39	0.0010548	0	8.0201e-05	0.0233128	0	0.00180505	0.00329712	4.37598e-05	1.40495e-05	4.20687e-05	1.40258e-05	4.1886e-05	0.0106499	0.000161183	0	3.28396e-05	1.72052e-05	0.000192844	1.51046e-05	5.03804e-05	1.3554e-05	0	0.00517881	0.000177644	0	4.51304e-05	0.00462703	0	0	0.0033052	2.87327e-05	1.55775e-05	1.84169e-05	1.66931e-05	0.00105137	0.000387127	0.00616752	0	0.000206003	1.36145e-05	0.00016952	1.53424e-05	8.21706e-05	2.88667e-05	1.92805e-05	0	0	5.77442e-05	0
unclassified_Rhodospirillales	0	0	0	0	0	0	0	0	0	0	0	0	0	0	0	0	0	0	0	0	0	1.43497e-05	0	0.00218639	0	0	0	0	0	0	0	0	0	0	0	0	0	0	0	0	0	0	0	0	0	0	0	0	0
uncultured_Acetivibrio_sp.	0.00103929	0.00143709	5.34674e-05	0.00336459	5.4339e-05	0.0003269	0.00181341	5.83465e-05	0	1.40229e-05	1.40258e-05	0.00681345	2.76621e-05	5.37278e-05	0	3.28396e-05	1.72052e-05	0.0018691	0	0	0.000108432	0	0.0340904	2.73299e-05	1.35311e-05	7.52174e-05	0	1.36351e-05	0	0	1.43664e-05	0	0.000276253	0.000166931	3.18598e-05	0.000201979	0.00451789	2.66159e-05	1.58464e-05	0	0.000123287	1.53424e-05	4.93024e-05	0.0029877	0.000115683	0.00342249	2.88471e-05	0	0
uncultured_Erysipelotrichaceae_bacterium	0	0	2.67337e-05	0.00233691	0	1.4213e-05	0.00119895	0	0	5.60915e-05	2.80517e-05	0.00230373	0	1.79093e-05	1.43174e-05	1.64198e-05	0	0.000148342	0	1.67935e-05	0	0	1.35927e-05	0	0	0	0	0	1.57699e-05	0.000122921	0	0	0	3.33862e-05	7.96495e-05	0.000319801	4.45845e-05	0	0	0	3.08219e-05	0	0	0	0	1.46888e-05	0	0	0
uncultured_Firmicutes_bacterium	0	0	0	0	0	0	0	0	0	0	0	0.00212222	6.91553e-05	1.79093e-05	0	1.64198e-05	0	0.000370854	0	0	0	0	1.35927e-05	0	0	0	1.44144e-05	0	0	0	0	0	1.84169e-05	0	0	3.36632e-05	1.48615e-05	0	1.58464e-05	0	0	1.53424e-05	0	0	0	1.46888e-05	0	0	0
uncultured_Ruminococcaceae_bacterium	0.000325748	0	2.67337e-05	0.00297041	2.71695e-05	0.000213195	1.49869e-05	0.00125445	1.40495e-05	5.60915e-05	1.40258e-05	0.00132639	1.38311e-05	7.16371e-05	0	3.28396e-05	3.44104e-05	0.00108289	0	5.03804e-05	0	0.000186546	0.000434966	0	0	1.50435e-05	0	0	1.57699e-05	0.000122921	1.43664e-05	3.11551e-05	3.68338e-05	0	4.77897e-05	0.000572275	0.00059446	0	0	0	6.16437e-05	1.53424e-05	9.86047e-05	0.001732	3.85609e-05	0.00376034	0.00252412	5.77442e-05	0
uncultured_Thermoanaerobacterales_bacterium	0	2.7115e-05	2.67337e-05	0	0	0	2.99738e-05	0	0	0	0	2.7924e-05	1.38311e-05	0	0.000744506	0	0	0	0	0	0	0	0	0	0	0	0	0	0	0	0	0	5.52507e-05	0	0	0	1.48615e-05	0	0	0	0	0	0	0	0	0	0	0	0
uncultured_gamma_proteobacterium	1.55118e-05	0	0	0	0	1.4213e-05	1.49869e-05	0	0	0	0	0	0	3.58185e-05	0	0	0	0	4.53138e-05	0	0	5.73987e-05	0	0	0	3.0087e-05	8.64865e-05	0	1.57699e-05	0	7.18319e-05	0	0.00154702	0	0	0.000908907	1.48615e-05	0	0.000459544	0	9.24656e-05	0.000276163	0	5.77334e-05	0.00154244	0	0	0	0
uncultured_prokaryote	0	0	0	0	0	0	0	0	0	0	0	0	0	0	0	0	0	0	0	3.35869e-05	2.7108e-05	2.86993e-05	1.35927e-05	1.36649e-05	2.70621e-05	0	0	0	0	0	0	0	0	0	0	0	4.45845e-05	0	1.58464e-05	0	0	3.06847e-05	0	0	0	0	0	0	0
uncultured_rumen_bacterium	0.000713543	0.000189805	4.01005e-05	0.0106991	0	0.00093806	0.000179843	4.37598e-05	1.40495e-05	0.000140229	0	0.00156374	1.38311e-05	3.58185e-05	0.000672919	3.28396e-05	1.72052e-05	0.00560731	0	1.67935e-05	0	0.00282689	0.000135927	0.0086909	0	0	0.000936937	0	3.15398e-05	0	2.87327e-05	0.000669834	0.000920844	0	0.000605337	0.0010099	0.00176852	1.3308e-05	3.16927e-05	2.7229e-05	0.000138698	6.13695e-05	3.28682e-05	0.000736101	1.92805e-05	8.81329e-05	0	0	0.0040119
[truncated: 179 more columns]

## Sheet: Genus
Genus	JC100	JC107	JC108	JC118	JC119	JC120	JC132	JC135	JC140	JC141	JC145	JC149	JC151	JC16	JC162	JC19	JC2	JC23	JC25	JC30	JC31	JC35	JC40	JC42	JC43	JC45	JC47	JC54	JC61	JC64	JC69	JC70	JC75	JC76	JC81	JC83	JC89	JC9	JC93	JF1	JF109	JF112	JF116	JF122	JF128	JF129	JF138	JF139	JF14
Acetobacter	0.00625126	0.000664317	0.000360905	8.44666e-05	0.00239091	0.00146394	0.00019483	0.000218799	0.00028099	0.00019632	0.000308568	0.000181506	0.000235128	0.00906209	0.00044384	0.0109028	0.0112866	0.000697205	0.0075372	0.0101768	0.000623484	0.00241075	0.000135927	0.000614922	0.000405932	0.00794296	0.00152793	4.09054e-05	0.00884691	5.46314e-05	0.00515753	0.00697874	0.00475156	0.0105333	0.0104022	0.00311385	0.00384913	0.00013308	0.00234526	0.00014976	0.00710444	0.00398901	0.0103535	0.00388257	0.00530212	0.000205643	0.000144236	0.000101052	0.00140276
Acidaminococcus	0	1.35575e-05	0	0	2.71695e-05	0	0	0	0	0	0	0	0	0	0	0	0	5.93366e-05	0	1.67935e-05	6.777e-05	2.86993e-05	0	0	0	0	0	0	1.57699e-05	1.36578e-05	0	0	0	0	0	0	0	0.00380608	0	0	0	0	0	0	0	0	0	0	0.000729436
Acinetobacter	0.00148913	0.000474512	8.0201e-05	0	0.000448296	0.000525882	5.99475e-05	4.37598e-05	8.42969e-05	9.81602e-05	9.81808e-05	2.7924e-05	9.68175e-05	0.0017372	0.000157492	0.00262717	0.00261519	0.00035602	0.00194849	0.00223353	0.000243972	0.000645735	4.0778e-05	0.000273299	4.05932e-05	0.0019707	0.000576577	5.45405e-05	0.00216047	2.73157e-05	0.00147974	0.00179142	0.00200744	0.00232034	0.00253286	0.00121188	0.0010403	1.3308e-05	0.000887396	1.36145e-05	0.00174144	0.00164163	0.00215287	0.001299	0.00200517	8.81329e-05	0.000129812	2.88721e-05	0.00126248
Actinomyces	3.10236e-05	8.13449e-05	0.000200503	0	0.00025811	0.00014213	1.49869e-05	0.000102106	0.000210742	0	0.000294543	0	0.000414932	1.79093e-05	0.000214761	0	0	5.93366e-05	0	0	0.00033885	2.86993e-05	0.000108741	4.09948e-05	4.05932e-05	0	4.32432e-05	0.000204527	0	0.00019121	0.000100565	0	9.20844e-05	3.33862e-05	1.59299e-05	5.04948e-05	2.9723e-05	0.000226235	3.16927e-05	0.000340363	6.16437e-05	4.60271e-05	0	0.000115467	7.71218e-05	5.87553e-05	8.65414e-05	2.88721e-05	8.41656e-05
Adlercreutzia	0	0.000772777	4.01005e-05	0.0001267	2.71695e-05	0.000369539	0	0	5.61979e-05	9.81602e-05	1.40258e-05	5.5848e-05	0.000152142	0.000107456	8.59045e-05	0	0	1.48342e-05	0	0	0	0.000229595	0	9.56546e-05	6.76553e-05	1.50435e-05	1.44144e-05	8.18107e-05	0	4.09735e-05	0	1.55775e-05	0	0	0	0.00010099	0.000208061	0	1.58464e-05	4.08436e-05	0.000215753	0	0	0.000577334	3.85609e-05	0	0.00102407	0	0
Advenella	0.000201654	4.06725e-05	0	0	4.07542e-05	8.52781e-05	0	1.45866e-05	0	0	0	0	0	0.000197002	0	0.000558274	0.000344104	0	0.00039272	0.000520597	0	4.3049e-05	0	5.46597e-05	1.35311e-05	0.000255739	1.44144e-05	0	0.000394247	0	0.000244228	0.000405016	0.000276253	0.000333862	0.000350458	0.000134653	0.000118892	1.3308e-05	0.000142617	0	0.000200342	0.000214793	0.000410853	0.000115467	0.000250646	0	0	0	2.80552e-05
Aeromonas	1.55118e-05	1.35575e-05	0.000120302	1.40778e-05	1.35847e-05	0	0.000224803	8.75197e-05	0.000295039	0.000154252	0.000308568	8.3772e-05	0.000165973	0	0.00044384	1.64198e-05	1.72052e-05	2.96683e-05	0	0	0	1.43497e-05	5.43707e-05	0	0	0	0	0	0	0	1.43664e-05	0	0.000110501	0	1.59299e-05	5.04948e-05	1.48615e-05	0	1.58464e-05	2.7229e-05	6.16437e-05	4.60271e-05	1.64341e-05	1.44333e-05	7.71218e-05	0.000146888	0.000129812	0.000129924	0
Agathobacter	0.0150309	0.100732	0.00987809	0.011769	0.00145357	0.00828619	0.0710229	0.0153159	0.0013628	0.0439758	0.0742387	0.049593	0.05567	0.00569515	0.0214761	0.000279137	0.000688208	0.0225924	0.00789971	0.000822879	0.0972634	0.0356159	0.0130082	0.0444384	0.152495	0.00147426	0.00272432	0.0374011	0.0366808	0.0867	0.00102001	0.0255783	0.00653799	0.0105167	0.000939865	0.0917155	0.00263048	0.000425855	0.00619592	0.00667111	0.0125137	0.0130564	0.000115039	0.0117632	0.00979447	0.0244716	0.0845221	0.0688889	0.00137471
Akkermansia	0.000325748	0.000176247	0.000588141	0.00748937	0.000163017	0.000966486	0.000164856	0.00013128	8.42969e-05	0.000154252	0.000294543	0.00013962	0.0232224	0.000358185	0.0494237	0.000426915	0.00043013	0.000593366	0.000151046	0.000184728	6.777e-05	0.000129147	0.00732646	0.0124898	0.000230028	0.000150435	0.000158559	5.45405e-05	0.000173469	2.73157e-05	0.00156593	0.00476673	0.00154702	0.00026709	0.00834727	0.00474652	0.00112947	1.3308e-05	0.00034862	0.00042205	0.000292808	0.000552325	0.000542326	0.000202067	0.00154244	0.000528797	0.0017741	0.0119242	0.00150095
Alcaligenes	0.00370732	0.000284707	0.000106935	7.03888e-05	0.00123621	0.00108019	7.49344e-05	8.75197e-05	0	0	1.40258e-05	0	0	0.00338485	0	0.00656793	0.00584976	0.000578532	0.00481837	0.0059113	0.000447282	0.00153541	5.43707e-05	0.000478273	0.000243559	0.00491922	0.00126847	1.36351e-05	0.00537753	1.36578e-05	0.00343356	0.00475115	0.00569082	0.00612637	0.00608523	0.00346731	0.00225895	6.65398e-05	0.00242449	2.7229e-05	0.00468492	0.00490956	0.00603132	0.0033774	0.00613118	4.40665e-05	0	0	0.000687353
Alistipes	0.0085315	0.00531453	0.00076191	0.00223836	0.000217356	0.00980699	0.00824279	0.00571795	0.0335502	0.0366558	0.000476878	0.0145903	0.0812852	0.00188047	0.0125421	0.000213458	0	0.00335252	0.000589079	0.000319076	9.48779e-05	0.0254133	0.00443121	0.0409675	0.0224886	6.01739e-05	0.00507387	0.00617671	6.30795e-05	0.0214155	0.000272961	0.0056858	0.0115474	0.000183624	0.000844285	0.019491	0.0194834	0.00013308	0.0162108	0.0326612	0.00332876	0.000552325	4.93024e-05	0.000447434	0.00657463	0.016804	0.029525	0.0384577	0.0136068
Allisonella	0	0	0	0	0	0	0	0	0	0	0	0	0	0	0	0	0	0.000192844	0	1.67935e-05	1.3554e-05	0	0	0	0	4.51304e-05	0	0	0	0.000641919	0	0.000264818	0.000349921	1.66931e-05	0	0.000504948	1.48615e-05	0	3.16927e-05	8.16871e-05	0	4.60271e-05	0	0	0	1.46888e-05	0	0	0
Allobaculum	0.000356772	0.00010846	0.000160402	4.22333e-05	0.000176602	0.000113704	1.49869e-05	1.45866e-05	0.000112396	5.60915e-05	7.01292e-05	1.3962e-05	5.53243e-05	0.000268639	0.000100222	0.000410496	0.000533361	2.96683e-05	0.000226569	0.000554184	4.0662e-05	0.000157846	2.71854e-05	4.09948e-05	6.76553e-05	0.000376087	8.64865e-05	4.09054e-05	0.000331168	0	0.000359159	0.000420594	1.84169e-05	0.000417327	0.000350458	6.73265e-05	0.000133753	0	1.58464e-05	0	0.000354451	0.000168766	0.000673799	8.66001e-05	0.000134963	4.40665e-05	0	1.44361e-05	8.41656e-05
Alloprevotella	0.000325748	4.06725e-05	0.000427739	1.40778e-05	0.000190186	5.68521e-05	1.49869e-05	0	1.40495e-05	2.80458e-05	4.20775e-05	5.5848e-05	1.38311e-05	0.000286548	7.15871e-05	0.00116581	0.000946285	0.000118673	0.000407824	0.00117554	0	0.000100448	1.35927e-05	6.83247e-05	4.05932e-05	0.000361043	0.00110991	4.09054e-05	0.000394247	0	0.000186763	0.000233663	5.52507e-05	0.00111844	0.000254879	5.04948e-05	0.000222922	2.66159e-05	3.16927e-05	4.08436e-05	0.000231164	0.000122739	0.00124899	0.0003897	0.000231365	1.46888e-05	1.44236e-05	2.88721e-05	2.80552e-05
Allorhizobium_Neorhizobium_Pararhizobium_Rhizobium	0.000775591	6.77874e-05	6.68342e-05	0	0.000366788	0.00028426	0	0	0	1.40229e-05	2.80517e-05	0	0	0.00107456	1.43174e-05	0.00131359	0.001342	0.000133507	0.000906276	0.00178011	6.777e-05	0.000272644	5.43707e-05	0.000136649	4.05932e-05	0.000887565	0.000273874	1.36351e-05	0.00113543	0	0.00063212	0.000919075	0.00112343	0.00138553	0.00136997	0.00072376	0.000535014	1.3308e-05	0.000364466	1.36145e-05	0.000940067	0.00113534	0.00165985	0.000606201	0.00163884	2.93776e-05	0	0	5.61104e-05
Aminobacterium	0	0	0.000441106	1.40778e-05	0.000122263	0	0	0	8.42969e-05	4.20687e-05	5.61033e-05	1.3962e-05	0	0.000465641	2.86348e-05	0.000509014	0.000808644	0	1.51046e-05	0.00048701	4.0662e-05	0	0	5.46597e-05	0	3.0087e-05	0	0	0	0	2.87327e-05	0	0	0.000767882	3.18598e-05	0	4.45845e-05	0	0	0	0	0	0.000493024	0	0	1.46888e-05	0	2.88721e-05	0
Anaerostipes	0.000263701	0.000257592	0.00358231	0.000549033	0.000108678	0.00014213	4.49607e-05	0.000714744	0.00028099	0.0026363	0.0245031	0.00034905	0.00203317	0.000143274	0.000128857	8.20991e-05	0	0.000563698	0.00376105	3.35869e-05	0.00074547	2.86993e-05	0.0109149	0.000355288	0.00181316	4.51304e-05	0.000158559	8.18107e-05	0.000441557	0.000600945	2.87327e-05	0.000109043	0.000202586	0.00171939	0	0.00245742	0.000148615	0.000811786	0.000142617	0.000667111	1.54109e-05	0.000398901	0	0.000317534	5.78414e-05	0.000455353	0.000865414	0.00531247	0.0168752
Apibacter	0.000217165	2.7115e-05	0	0	0.000149432	2.8426e-05	0	0	0	0	0	0	0	0.000107456	0	0.000509014	0.000567771	4.45025e-05	0.000453138	0.00038625	0	0.000143497	0	0	1.35311e-05	0.000361043	5.76577e-05	0	0.000362707	0	0.000272961	0.000451749	1.84169e-05	0.000517486	0.000493827	0	0.000133753	0	0	0	0.000292808	6.13695e-05	0.000460155	0.0001299	0	0	0	0	5.61104e-05
Aquabacterium	0.000108583	0.00010846	0.000200503	9.85444e-05	8.15084e-05	4.26391e-05	0	0	0	0	0	0	0	0.000161183	1.43174e-05	0.000246297	0.000275283	5.93366e-05	0.000135941	0.000184728	8.1324e-05	7.17484e-05	8.15561e-05	0.000150314	8.11864e-05	0.000165478	5.76577e-05	5.45405e-05	0.000283858	2.73157e-05	0.000129297	0.000171353	0.000147335	0.000250396	0.000175229	0.000185148	7.43075e-05	1.3308e-05	0.000190156	6.80726e-05	0.000292808	0.000245478	0.000345117	8.66001e-05	0.000231365	0	0	0	2.80552e-05
Arsenophonus	0.000186142	2.7115e-05	0	0	0.000108678	7.10651e-05	0	0	0	0	0	0	0	0.000340276	0	0.000311977	0.000361309	0	0.000181255	0.000352663	0	0.000114797	0	2.73299e-05	0	0.000165478	8.64865e-05	0	0.000362707	1.36578e-05	0.00015803	0.000327128	0	0.000300476	0.000302668	0	0.000133753	0	0	1.36145e-05	0.000277397	0.000214793	0.000443721	0.000144333	0	0	0	0	8.41656e-05
Aureimonas	0.000635984	5.42299e-05	1.33668e-05	1.40778e-05	0.000217356	0.000227408	0	0	0	1.40229e-05	0	0	0	0.000823826	1.43174e-05	0.00108371	0.000911875	8.90049e-05	0.000709916	0.000822879	0.000149094	0.000286993	1.35927e-05	9.56546e-05	0	0.000707043	0.000144144	1.36351e-05	0.00100927	0	0.000531556	0.000560791	0.000607757	0.0009682	0.000812425	0.000605938	0.000445845	0	0.000507083	0	0.000616437	0.000690406	0.00100248	0.000461867	0.00107971	1.46888e-05	0	0	7.0138e-05
Bacillus	0.0309771	0.00509761	0.00413035	0.000549033	0.0199152	0.011541	0.00101911	0.000758504	0.0013347	0.00121999	0.0025527	0.00104715	0.00134161	0.0426062	0.00207603	0.0509179	0.0470906	0.00445025	0.0398912	0.0490705	0.00294122	0.0162008	0.000924302	0.00621755	0.00290918	0.0414749	0.00712072	0.000763567	0.0428783	0.000833128	0.0373238	0.0380559	0.0193561	0.0406978	0.0464357	0.012994	0.0207912	0.000319391	0.0107121	0.00027229	0.0358612	0.0200832	0.0496639	0.0243202	0.0204373	0.000984151	0.000591366	0.000692931	0.00822018
Bacteroides	0.0585261	0.197533	0.0948244	0.0883521	0.00239091	0.0603485	0.209067	0.229185	0.242452	0.16439	0.241441	0.155983	0.146817	0.00282966	0.0978309	0.00295557	0.00115275	0.0399039	0.0583189	0.00272054	0.132856	0.195199	0.258859	0.252692	0.210543	0.0194663	0.0221117	0.1488	0.01864	0.0711027	0.0331863	0.0282265	0.0554348	0.00938152	0.00476304	0.0683364	0.0577815	0.175559	0.203404	0.132837	0.0493458	0.0219549	0.00167628	0.0112003	0.0701037	0.355132	0.206343	0.248473	0.155496
Barnesiella	0.00366079	0.00188449	0.000895578	4.22333e-05	2.71695e-05	0.0119247	0.00665418	0.0148638	4.21484e-05	0.00377216	2.80517e-05	0.00728816	4.14932e-05	1.79093e-05	0.000286348	1.64198e-05	1.72052e-05	0.000875215	4.53138e-05	3.35869e-05	5.4216e-05	0.00241075	2.71854e-05	0.0164389	4.05932e-05	3.0087e-05	4.32432e-05	0.000927188	4.73097e-05	0.000532656	2.87327e-05	0.00236779	0.00360971	6.67724e-05	0.000621266	0.000336632	0.00282368	0	0.00315342	1.36145e-05	0.000246575	0.000138081	0	0.000245367	7.71218e-05	0.00487669	0.00274048	1.44361e-05	0
Bifidobacterium	0.00068252	0.0108053	0.00721809	0.00677141	0.000366788	0.000568521	0.000119895	0.0374584	0.00081487	0.0205435	0.0011922	0.000739986	0.035449	0.000716371	0.00144606	0.000377656	0.000137642	0.000400522	0.00809607	0.000251902	0.0290055	0.000315693	0.00258261	0.000273299	0.004357	0.00849956	0.00425225	0.000218162	0.0111808	0.011855	0.000890715	0.000389438	0.000791926	0.000367248	7.96495e-05	0.000218811	0.000520152	0.112838	0.00261465	0.000340363	0.000601026	0.0009052	6.57365e-05	0.000375267	0.00107971	0.000631619	0.000173083	0.000259849	0.016763
Bilophila	0.000201654	9.49024e-05	0.0025397	0.000183011	4.07542e-05	0.000198982	0.000179843	0.00157535	0.00276775	0.00082735	0.000476878	0.000111696	0.000871357	1.79093e-05	0.000529744	0	3.44104e-05	5.93366e-05	0	1.67935e-05	0	0.00087533	0.000611671	0.00142115	0.000135311	6.01739e-05	0.00145586	0.00511317	4.73097e-05	0.000204868	7.18319e-05	0.000264818	0.00058934	3.33862e-05	1.59299e-05	0.000185148	1.48615e-05	2.66159e-05	0.000792318	0.00232808	6.16437e-05	6.13695e-05	0	5.77334e-05	0	0.00139544	1.44236e-05	0.000577442	0.000729436
Blautia	0.00181488	0.00521963	0.0051195	0.00415294	0.0014264	0.0139856	0.0122443	0.0186125	0.00415865	0.00180895	0.00650799	0.00410483	0.00398335	0.00121783	0.00429523	0.000147778	0.000120436	0.0156204	0.00202402	0.000201521	0.0228791	0.00387441	0.0101809	0.0100301	0.00368045	0.000842435	0.00763964	0.00572675	0.00100927	0.00329154	0.00284454	0.00119947	0.00206269	0.000984893	0.000286738	0.0104019	0.00488943	0.00507033	0.00247203	0.00505099	0.00232705	0.00230135	4.93024e-05	0.00554241	0.00208229	0.0053908	0.0193853	0.0207446	0.00699978
Brachybacterium	0.00411063	0.000488069	5.34674e-05	0.000112622	0.00207847	0.00126496	5.99475e-05	4.37598e-05	2.8099e-05	0	1.40258e-05	0	1.38311e-05	0.00891882	0	0.00975337	0.00882626	0.000400522	0.00667623	0.00854787	0.000325296	0.0019946	4.0778e-05	0.000601257	0.000311215	0.00559617	0.00085045	1.36351e-05	0.00665489	1.36578e-05	0.00443921	0.00676065	0.00204427	0.00909774	0.00925528	0.0012792	0.00273451	3.99239e-05	0.000839857	1.36145e-05	0.00579451	0.00254683	0.00866078	0.00327637	0.00264142	2.93776e-05	1.44236e-05	4.33082e-05	0.00102402
Bradyrhizobium	0.000108583	5.42299e-05	0.000147035	7.03888e-05	5.4339e-05	0.000127917	4.49607e-05	2.91732e-05	5.61979e-05	8.41373e-05	8.4155e-05	2.7924e-05	0.00012448	0.000214911	7.15871e-05	0.000213458	0.000172052	8.90049e-05	9.06276e-05	0.000184728	5.4216e-05	4.3049e-05	1.35927e-05	5.46597e-05	1.35311e-05	9.02609e-05	4.32432e-05	2.72702e-05	0.000157699	2.73157e-05	0.000244228	0.000109043	0.000663008	0.00026709	0.000175229	0.000488117	0.000133753	1.3308e-05	0.000285234	0	0.000154109	0.000214793	0.000131473	4.33e-05	0.000829059	0	4.32707e-05	1.44361e-05	2.80552e-05
Brevibacterium	0.0123784	0.00120662	0.000187136	0.000197089	0.00646634	0.0040365	0.00019483	0.000189626	8.42969e-05	7.01144e-05	5.61033e-05	2.7924e-05	0	0.0280459	5.72697e-05	0.0255328	0.0246894	0.00158725	0.0180802	0.025039	0.00120631	0.00529503	0.000285446	0.00185843	0.00075774	0.0188645	0.00272432	0.000163621	0.0190973	0.000122921	0.0134613	0.0183971	0.00681425	0.0259077	0.0237037	0.00451087	0.00808465	0.000119772	0.00399328	0.000122531	0.0160736	0.00699612	0.024832	0.00857341	0.00761578	0.000161577	2.88471e-05	4.33082e-05	0.00297385
Brevundimonas	0.000139606	2.7115e-05	6.68342e-05	1.40778e-05	5.4339e-05	2.8426e-05	0	0	1.40495e-05	0	1.40258e-05	0	0	0.000125365	0	0.000164198	0.000154847	4.45025e-05	0.000105732	0.000100761	1.3554e-05	2.86993e-05	6.79634e-05	8.19896e-05	4.05932e-05	3.0087e-05	4.32432e-05	6.81756e-05	0.000157699	5.46314e-05	8.61982e-05	0.000140198	0.000110501	0.000133545	0.000143369	0.000201979	0.000133753	3.99239e-05	4.75391e-05	0.000108916	0.000215753	0.000153424	0.000131473	0.000158767	0.000289207	1.46888e-05	0	0	4.20828e-05
Butyricicoccus	0.000403307	0.007782	0.00470513	0.00183011	0.000190186	0.00923847	0.00202323	0.00700158	0.00955365	0.000799304	0.0105615	0.00460746	0.0026694	0.000680552	0.000544062	4.92595e-05	1.72052e-05	0.00394589	0.00140473	3.35869e-05	0.00299543	0.00552462	0.011513	0.00538398	0.00262503	0.000165478	0.00184505	0.00943551	0.000946193	0.00551777	0.000430991	0.00221201	0.00178644	0.000617645	0.000143369	0.00136336	0.000193199	2.66159e-05	0.00256711	0.00119808	0.000893834	0.00243944	0	0.00161653	0.00291135	0.00233552	0.00571173	0.00804088	0.00495175
Butyricimonas	0.00138055	0.000799892	0.000133668	0.00136554	1.35847e-05	0.00157765	0.000824279	0	0.00389171	0.00243998	5.61033e-05	0.00062829	0.00681872	0.000161183	0.00108812	1.64198e-05	0	0.000697205	0	0.000100761	4.0662e-05	0.00482149	2.71854e-05	0.00157147	1.35311e-05	0	0.00098018	0.000463594	0	0.00140676	1.43664e-05	0.000405016	0.000184169	1.66931e-05	9.55795e-05	0.000370296	0.00107003	1.3308e-05	0.000618008	0.00227362	0.000184931	4.60271e-05	0	0.000187634	0.00185092	0.00233552	0.0017741	1.44361e-05	0.00248289
Butyrivibrio	1.55118e-05	0	0	0.00763015	6.79237e-05	1.4213e-05	0	2.91732e-05	0	1.40229e-05	1.40258e-05	0	0	0	0	0	0	0	0	0	0	0	1.35927e-05	2.73299e-05	4.05932e-05	0	0	0	0	0	0	0	0	0	0	0	0.000609321	0	0	0	0.000878423	0	0	4.33e-05	5.78414e-05	1.46888e-05	0	0	0
CAG_352	0.000217165	0	0	0	0	0	0	0	0	0	1.40258e-05	0	0	0	1.43174e-05	0	0	0	0	0	1.3554e-05	0	0.000706819	0	0	0	0	0	0	8.19471e-05	0	0	0	0	3.18598e-05	0	1.48615e-05	0	1.58464e-05	0	0	0	0	0	0	2.93776e-05	0	0	0
CAG_56	0.000868661	0.00359273	0.000213869	0.00168933	0	0.00538674	0.000584489	0.00212965	0.00265535	0.000126206	0.000659214	0.00333692	0.00147992	0.00234611	0.00207603	0	1.72052e-05	0.00265531	0.000634393	0	0.00224996	0.000660085	0.00479822	0.00761137	0.000243559	0.000586696	0.00100901	2.72702e-05	1.57699e-05	0.00106531	1.43664e-05	0.00113716	0.00178644	0.000116852	6.37196e-05	0.00358513	0.0011592	1.3308e-05	0.000808164	0.00069434	0.000354451	0.000920542	3.28682e-05	4.33e-05	5.78414e-05	0.0087986	0.00350493	0.00327698	0
Campylobacter	0	0	0	0	0	0	0	0	0	0	0	0	4.14932e-05	0	0	0	0	0	0	0	0	0	1.35927e-05	0	0	0	1.44144e-05	0	0	0	0	0	0	0	0	0	0	0	0	0.0104696	0	0	0	0	0	0	0	0	0
Caproiciproducens	0	0	0	0	1.35847e-05	0	7.49344e-05	1.45866e-05	0.000168594	0.000112183	0.000294543	6.981e-05	0.000110649	0	0.000243396	0	0	0	0	0	0	0	0	0	0	0	0	1.36351e-05	0	0	0	0	0	1.66931e-05	0	0	0	0	0	0	0	0	0	1.44333e-05	0	0.000176266	4.32707e-05	8.66163e-05	0
Catenibacterium	0	0	1.33668e-05	0	1.35847e-05	0.0017482	0	2.91732e-05	0	1.40229e-05	4.20775e-05	0	0	0	0	0	1.72052e-05	1.48342e-05	0	0	0	0	8.15561e-05	8.19896e-05	2.70621e-05	6.01739e-05	5.76577e-05	0	1.57699e-05	0.000819471	0	0	1.84169e-05	0	0	1.68316e-05	0	0	0	4.08436e-05	0	1.53424e-05	0	0	3.85609e-05	1.46888e-05	0	0	0
Christensenellaceae_R_7_group	0.00142709	0.00637202	0.00112281	0.00254808	0.000298864	0.0053441	0.0407194	0.0140615	0.00276775	0.000154252	0.000350646	0.00869832	0.00138311	0.00578469	0.0369103	6.56793e-05	5.16156e-05	0.0072094	1.51046e-05	0.000319076	0.00138251	0.00252554	0.0292107	0.00239136	0.00129898	0.000466348	0.0418883	0.000204527	0.000236548	0.00458904	0.000100565	0.000358283	0.00112343	0.000467407	0.00121067	0.020097	0.018027	3.99239e-05	0.00212341	0.00334917	0.00328253	0.000398901	3.28682e-05	0.0119508	0.000829059	0.00402474	0.0178996	0.00128481	0.000785546
Chryseobacterium	0.000124094	0	0	0	0.000122263	2.8426e-05	0	0	1.40495e-05	0	1.40258e-05	0	0	0.000161183	4.29523e-05	0.000443335	0.000326899	4.45025e-05	0.000226569	0.000218315	4.0662e-05	1.43497e-05	0	0	4.05932e-05	0.00039113	2.88288e-05	1.36351e-05	0.000173469	0	0.000215496	0.000311551	0.000221003	0.000300476	0.000430108	0.000168316	0.000208061	1.3308e-05	0.000126771	0	0.000231164	0.000214793	0.000262946	8.66001e-05	0.000134963	0	0	0	8.41656e-05
Cloacibacillus	0	0	0	0	0	0	4.49607e-05	0	0	0	0	0	0	7.16371e-05	0	0	0	1.48342e-05	0	0	0	0.000330042	0	0.0023777	0	0	0.000158559	0	0	1.36578e-05	0	0	1.84169e-05	0	0	0	0.000490429	0	0	0.000762413	0	0	0	0	0	0.000514109	0	0	0
Clostridium	0	0	0	0	0.000149432	0	0	1.45866e-05	0	0	1.40258e-05	0	0	0.000411913	0	0.000623953	0.000447335	1.48342e-05	3.02092e-05	0.000419836	1.3554e-05	0	0	4.09948e-05	0	0	1.44144e-05	0	0	0	2.87327e-05	1.55775e-05	0	0.000550872	0	1.68316e-05	1.48615e-05	0	0	0	3.08219e-05	1.53424e-05	0.000542326	2.88667e-05	0	0	0	0	0
Clostridium_sensu_stricto_1	0.00221819	0.00532809	0.00239266	0.000844666	0.00229582	0.012209	0.000524541	0.00498862	0.000477682	0.000224366	0.000855576	0.00142412	0.000802202	0.00238193	0.00154628	0.00293915	0.00294209	0.00053403	0.00167661	0.00275413	0.00506919	0.000760533	0.0559475	0.000642252	0.0194441	0.00303878	0.00085045	0.000122716	0.00203432	6.82892e-05	0.0015372	0.00174468	0.00211794	0.0036224	0.00240542	0.00124554	0.00202116	0.00051901	0.00343866	0.000163374	0.00203424	0.00320655	0.00248155	0.0039836	0.00231365	0.0022327	0.0171208	0.0154321	0.000378745
Clostridium_sensu_stricto_12	0.00245087	0.000230477	6.68342e-05	0	0.0012498	0.000639586	1.49869e-05	1.45866e-05	1.40495e-05	1.40229e-05	2.80517e-05	1.3962e-05	0	0.0032774	0	0.00523792	0.00409484	0.000237346	0.00318707	0.00480293	0.00013554	0.00106188	1.35927e-05	0.000382618	9.47175e-05	0.00344496	0.000230631	4.09054e-05	0.00357976	1.36578e-05	0.00271524	0.00330244	5.52507e-05	0.00375595	0.00399841	3.36632e-05	0.00150101	3.99239e-05	6.33854e-05	2.7229e-05	0.00274315	0.000598352	0.00456869	0.00137117	0.000134963	4.40665e-05	0	0	0.00064527
Clostridium_sensu_stricto_3	0.000124094	5.42299e-05	0	0.000154855	0.000108678	0.000156343	1.49869e-05	2.91732e-05	1.40495e-05	5.60915e-05	0	1.3962e-05	0.00012448	0.000143274	2.86348e-05	0.000279137	0.000326899	1.48342e-05	0.000120837	0.000235108	1.3554e-05	0.000100448	0	0	2.70621e-05	0.000255739	1.44144e-05	0	0.000110389	0	0.000215496	0.00012462	0.000313087	0.000233703	0.000191159	0.000151485	8.91689e-05	0	0.00017431	0	0.000123287	0.000168766	0.000328682	0.000202067	0.00044345	0	0	0	2.80552e-05
Colidextribacter	9.30709e-05	0.000555857	0.000427739	0.0003801	6.79237e-05	0.000866995	5.99475e-05	2.91732e-05	5.61979e-05	5.60915e-05	0.000126233	0.00122866	4.14932e-05	0.000286548	0.000472475	0.000311977	0.000120436	0.000459859	4.53138e-05	0.000251902	5.4216e-05	0	0.000176705	0.000150314	0.000148842	6.01739e-05	0.000951351	5.45405e-05	3.15398e-05	0.0011336	0.000100565	3.11551e-05	0.000736675	0.000250396	7.96495e-05	0.00144752	0.000193199	2.66159e-05	7.92318e-05	0	6.16437e-05	3.06847e-05	0.000164341	2.88667e-05	0.000269926	0.000102822	2.88471e-05	0.000187669	7.0138e-05
Collinsella	9.30709e-05	0.00315889	0.00199166	0.000267478	0.0012498	0.000810142	0.00067441	0.000306319	0.0012504	0.000350572	0.000280517	0.000670176	1.38311e-05	0	0.0026344	1.64198e-05	0	0.000326351	1.51046e-05	1.67935e-05	1.3554e-05	0	4.0778e-05	0.000505603	1.35311e-05	0.000165478	0.000403604	0.000545405	0.000189239	0.00101068	1.43664e-05	0.000342706	0.000184169	0.000166931	4.77897e-05	0.00107722	0.00108489	1.3308e-05	0.00843026	5.44581e-05	0.000308219	0.000429586	0	0	0.00173524	0.00110166	0.00271163	0.0016024	4.20828e-05
Comamonas	0.000294724	0.00016269	0.000334171	4.22333e-05	0.000176602	0.000369539	2.99738e-05	0	4.21484e-05	4.20687e-05	1.40258e-05	1.3962e-05	0.000138311	0.000608915	0.000143174	0.000591114	0.000584976	0.000118673	0.000407824	0.000738912	4.0662e-05	0.000272644	1.35927e-05	4.09948e-05	6.76553e-05	0.000556609	0.000100901	0	0.000473097	2.73157e-05	0.000416625	0.000529636	0.000663008	0.000584258	0.000716846	0.000370296	0.000341814	0	0.000633854	0	0.00049315	0.00052164	0.000739536	0.000288667	0.000559133	0	5.76942e-05	1.44361e-05	7.0138e-05
Companilactobacillus	0.00544465	0.00103037	0.000120302	8.44666e-05	0.00311091	0.00233094	4.49607e-05	5.83465e-05	0	2.80458e-05	0	1.3962e-05	2.76621e-05	0.00589215	0	0.00931004	0.00806923	0.000667537	0.00715958	0.0089845	0.00081324	0.00294168	4.0778e-05	0.000792566	0.000432994	0.00762704	0.00148468	2.72702e-05	0.00725415	5.46314e-05	0.00731248	0.00671392	0.00475156	0.00781237	0.00769415	0.0029792	0.00384913	0.000106464	0.0028365	9.53016e-05	0.0056404	0.00375888	0.00854574	0.00396917	0.00445378	1.46888e-05	4.32707e-05	0	0.00169734
Coprobacillus	0	0	4.01005e-05	1.40778e-05	0	1.4213e-05	0	0	0.000323138	0	0	0	1.38311e-05	0	0.000257714	0	0	1.48342e-05	0	0	0	0	0	0	5.41243e-05	0	0	0	0	0	0	0	1.84169e-05	0	6.37196e-05	0	0.00138212	1.3308e-05	0	0.000340363	0	3.06847e-05	1.64341e-05	4.33e-05	1.92805e-05	1.46888e-05	0.000245201	1.44361e-05	0
Coprobacter	3.10236e-05	6.77874e-05	0	1.40778e-05	0	0	0	0	1.40495e-05	0	0	0	0.00065006	0	7.15871e-05	0	0	0	1.51046e-05	0	1.3554e-05	1.43497e-05	0	0.000669582	0	0	2.88288e-05	0.000477229	0	0	1.43664e-05	0	0.000110501	0	1.59299e-05	0	0	0	0.000110924	0	0.000138698	0	0	0	0	0	0	0	0
Coprococcus	0.00493276	0.0144387	0.00189809	0.0308725	0.00051622	0.00983541	0.00275759	0.00360289	0.00191073	0.000462755	0.00166907	0.0368317	0.0389898	0.0038684	0.0214475	0.000246297	0.000103231	0.0473655	0.000936485	0.000100761	0.012307	0.0022529	0.00326224	0.0325772	0.00179963	0.00151939	0.0454054	0.00152713	0.000315398	0.0133164	0.000143664	0.00682296	0.0153044	0.000767882	0.000700916	0.0134653	0.00628641	0.000146388	0.00131525	0.00216471	0.00335958	0.000935884	4.93024e-05	0.00698574	0.000886901	0.00950366	0.0166592	0.010957	0.0241415
Corynebacterium	0.00285417	0.00037961	0.000160402	2.81555e-05	0.00137206	0.00093806	2.99738e-05	0.000102106	4.21484e-05	1.40229e-05	1.40258e-05	1.3962e-05	1.38311e-05	0.00508623	1.43174e-05	0.00532002	0.00480025	0.000192844	0.00401782	0.00463499	0.000189756	0.00117667	6.79634e-05	0.000273299	0.000162373	0.00400156	0.00036036	4.09054e-05	0.00384785	4.09735e-05	0.00274398	0.00397227	0.000791926	0.00485769	0.00481083	0.000555443	0.00184282	3.99239e-05	0.000443698	6.80726e-05	0.0032363	0.0013041	0.00519318	0.0016021	0.000790499	2.93776e-05	4.32707e-05	0	0.000771518
Cronobacter	0.00017063	8.13449e-05	0.00167085	0	6.79237e-05	5.68521e-05	1.49869e-05	0	0.00103966	0.000140229	0.000126233	2.7924e-05	4.14932e-05	0.000286548	0.000171809	0.000131359	0.000240873	0.000118673	0.000151046	0.000268695	2.7108e-05	8.6098e-05	2.71854e-05	4.09948e-05	1.35311e-05	0.000240696	2.88288e-05	0.000163621	0.000236548	0	0.000186763	0.000233663	0.000110501	0.00026709	0.000191159	5.04948e-05	0.000178338	2.66159e-05	9.50781e-05	0.00204218	0.000523972	0.000490956	0.000295814	8.66001e-05	7.71218e-05	0	1.44236e-05	0	8.41656e-05
Desulfovibrio	0.00107032	1.35575e-05	0	0.00837627	4.07542e-05	0	1.49869e-05	0.00627224	0	0	1.40258e-05	0	1.38311e-05	3.58185e-05	0	1.64198e-05	0	7.41708e-05	0	3.35869e-05	1.3554e-05	0	2.71854e-05	0.00732441	5.41243e-05	6.01739e-05	4.32432e-05	1.36351e-05	3.15398e-05	2.73157e-05	2.87327e-05	0.00112158	1.84169e-05	5.00793e-05	1.59299e-05	1.68316e-05	0.000713352	1.3308e-05	0	2.7229e-05	0	4.60271e-05	1.64341e-05	4.33e-05	3.85609e-05	1.46888e-05	0.00174525	1.44361e-05	0
Dialister	0.00649945	0.0311958	0.00160402	0.0577329	0.000652068	0.0314108	0.000119895	0.0331262	0.0467426	0.000462755	0.000294543	0.000474708	0.0477034	0.0052116	0.0991624	0.000262717	0.000103231	0.0529579	0.0042595	0.000302282	0.0525488	0.015182	0.0360886	0.000396283	0.0548685	0.000165478	0.0378234	0.0307881	9.46193e-05	0.0554508	0.000531556	0.000514059	0.0160779	0.00502462	0.000111509	0.000387127	0.0624777	0.000212927	0.000713086	0.00921703	0.00907704	0.0010126	0.000115039	0.0003464	0.00086762	0.000161577	0.000375013	0.000259849	0.0029458
Dorea	0.00122543	0.0052603	0.00232583	0.0022806	0.0043607	0.007206	0.00559011	0.00705992	0.000885117	0.000378618	0.00360464	0.00221996	0.00203317	0.000591006	0.00506837	8.20991e-05	5.16156e-05	0.012342	0.000785439	8.39673e-05	0.00231773	0.00307083	0.0051924	0.00161246	0.0022191	0.000556609	0.00121081	0.0015544	0.000157699	0.00295009	2.87327e-05	0.000638679	0.000994512	0.000283783	9.55795e-05	0.00250791	0.00260076	6.65398e-05	0.00107755	0.00142952	0.00124829	0.000751776	1.64341e-05	0.00140003	0.00225581	0.00415694	0.00868298	0.00106827	0.00211817
Dubosiella	4.65354e-05	2.7115e-05	0.000748543	2.81555e-05	8.15084e-05	1.4213e-05	0	0	1.40495e-05	0	2.80517e-05	0	0	1.79093e-05	0	0.000213458	0.000172052	5.93366e-05	0.000120837	0.000201521	6.777e-05	1.43497e-05	2.71854e-05	6.83247e-05	2.70621e-05	6.01739e-05	2.88288e-05	1.36351e-05	0.000141929	4.09735e-05	2.87327e-05	0.00012462	9.20844e-05	0.000150238	4.77897e-05	6.73265e-05	4.45845e-05	2.66159e-05	1.58464e-05	2.7229e-05	6.16437e-05	4.60271e-05	0.000230078	4.33e-05	0.000173524	0	0	0	1.40276e-05
Eggerthella	0	5.42299e-05	9.35679e-05	0	1.35847e-05	0	1.49869e-05	0.000204213	2.8099e-05	2.80458e-05	0.000126233	1.3962e-05	1.38311e-05	0	1.43174e-05	0	0	0	0	0	0.00104366	8.6098e-05	0.000149519	0.000136649	0.000189435	0	2.88288e-05	2.72702e-05	0	0	2.87327e-05	0	0	0	3.18598e-05	1.68316e-05	0	0	0	1.36145e-05	0	1.53424e-05	0	0.0002165	0	0	2.88471e-05	0.000115488	5.61104e-05
Eisenbergiella	0	1.35575e-05	0	0	1.35847e-05	2.8426e-05	0	0.000379252	0	0.000112183	0.000364672	0	0	0	0.000400888	0	0	4.45025e-05	0	0	0	1.43497e-05	0	0.000122984	0.000351808	0	0	0	0	1.36578e-05	0	0	0	0	1.59299e-05	0	1.48615e-05	0	3.16927e-05	0	0	0	0	0	0	7.34441e-05	0	1.44361e-05	0.000168331
Enhydrobacter	0.00017063	0	4.01005e-05	1.40778e-05	4.07542e-05	2.8426e-05	1.49869e-05	1.45866e-05	0	1.40229e-05	4.20775e-05	1.3962e-05	1.38311e-05	5.37278e-05	0	8.20991e-05	8.60259e-05	5.93366e-05	6.04184e-05	0.000151141	0	0	0	1.36649e-05	1.35311e-05	0.000135391	4.32432e-05	0	9.46193e-05	0	8.61982e-05	0.000109043	0.000110501	0.000166931	0.000223019	6.73265e-05	4.45845e-05	0	4.75391e-05	0	0.000123287	0.000107397	0.000131473	8.66001e-05	0.000192805	2.93776e-05	0	1.44361e-05	2.80552e-05
Enterobacter	6.20472e-05	2.7115e-05	5.34674e-05	0	1.35847e-05	2.8426e-05	1.49869e-05	0	0	1.40229e-05	2.80517e-05	0	1.38311e-05	0.000268639	2.86348e-05	0.000164198	0.000206462	5.93366e-05	0.000105732	0.000251902	2.7108e-05	2.86993e-05	1.35927e-05	0	1.35311e-05	0.000210609	1.44144e-05	1.36351e-05	0.000173469	1.36578e-05	1.43664e-05	4.67326e-05	1.84169e-05	0.000100159	0.000111509	3.36632e-05	5.9446e-05	0	3.16927e-05	0.000285905	0.000107877	7.67118e-05	0.000230078	5.77334e-05	0.000154244	1.46888e-05	0	1.44361e-05	0
Enterococcus	0.00150465	0.00021692	8.0201e-05	0	0.000964517	0.000554308	0.00023979	2.91732e-05	0.00123635	5.60915e-05	0.00067324	0.000404898	0.000290452	0.00146856	0.000515427	0.00193754	0.00192698	0.000192844	0.001299	0.00178011	0.000162648	0.000789232	0	0.000191309	0.000148842	0.00156452	0.000187387	0.000231797	0.00165584	0.000163894	0.0015803	0.00144871	0.000607757	0.00175278	0.00167264	0.000218811	0.0011592	0.000146388	0.000269388	0.000163374	0.00135616	0.000536983	0.00215287	0.000909301	0.000771218	0.000102822	1.44236e-05	7.21803e-05	0.000364718
Erysipelatoclostridium	0	1.35575e-05	5.34674e-05	0	0	0	0	0	7.02474e-05	2.80458e-05	0.000280517	0	0	3.58185e-05	7.15871e-05	0	0	0	1.51046e-05	0	0	0	0	2.73299e-05	0	0	0	0	1.57699e-05	0	1.43664e-05	0	5.52507e-05	1.66931e-05	9.55795e-05	0	0.00216978	0.000173003	0	5.44581e-05	1.54109e-05	1.53424e-05	0	2.88667e-05	0	1.46888e-05	0	0	0.000687353
Erysipelotrichaceae_UCG_003	0.000899685	0.00718547	0.00272684	0.0126418	0.00999837	0.000582734	0.00158861	0.00180874	0.00827515	1.40229e-05	0.00148674	0.00141016	0.0014246	0.000143274	0.00226215	0	1.72052e-05	0.0023438	0.000347406	6.71738e-05	0.00258881	0.00485019	0.00274572	0.00166712	0.00192141	7.52174e-05	0.00283964	0.00140442	0.000725415	0.000232183	0.00205439	0.000342706	0.000257836	0.00100159	6.37196e-05	0.00308019	0.000520152	0.00239543	0.000649701	0.000122531	0.000308219	0.000429586	8.21706e-05	0.00178974	0.000231365	0.00362814	0.00137024	0.00290165	1.40276e-05
Escherichia_Shigella	0.00618921	0.00200651	0.0924718	0.00111214	0.579471	0.0200262	0.164601	0.00580547	0.0930919	0.3369	0.247879	0.00108904	0.0470118	0.00539069	0.00240533	0.00507373	0.00545404	0.0368332	0.00546786	0.00475255	0.0078071	0.0155407	0.00333021	0.0115742	0.0251813	0.027349	0.0274018	0.053477	0.00700183	0.0038242	0.286006	0.00799128	0.00298354	0.0072615	0.00806053	0.00509998	0.00988289	0.0419866	0.0149431	0.0220964	0.00759759	0.00458737	0.0061628	0.00700017	0.00497436	0.00311403	0.0111061	0.00181894	0.298255
Faecalibacterium	0.064979	0.230301	0.0627573	0.176718	0.00296147	0.0921857	0.14308	0.283374	0.252427	0.117708	0.0555283	0.12119	0.23676	0.0459194	0.0881523	0.00262717	0.00142803	0.119148	0.0593762	0.00335869	0.340802	0.0835007	0.125773	0.13326	0.109493	0.0180522	0.100685	0.0474093	0.0513941	0.157625	0.00231299	0.0475271	0.0292276	0.013872	0.00385504	0.0811621	0.0420283	0.0815645	0.0596457	0.031926	0.0391129	0.0433268	0.000361551	0.073076	0.0264721	0.157714	0.155601	0.193255	0.0755527
Faecalitalea	1.55118e-05	2.7115e-05	2.67337e-05	1.40778e-05	4.07542e-05	0	0	4.37598e-05	2.8099e-05	0	0.000603111	4.1886e-05	0.000110649	0	0	0	0	0	0	0	0.000149094	0.00110492	6.79634e-05	0.000150314	0.000744209	0	0	0.000204527	0	0	5.74655e-05	0	0	0	0	0	0	1.3308e-05	1.58464e-05	0.000517352	0	0	0	1.44333e-05	7.71218e-05	1.46888e-05	0	0.000115488	2.80552e-05
Family_XIII_AD3011_group	0.000108583	4.06725e-05	9.35679e-05	0.000309711	1.35847e-05	9.94912e-05	8.99213e-05	1.45866e-05	0	4.20687e-05	0	0.000307164	8.29864e-05	3.58185e-05	0.000458157	1.64198e-05	0	0.00043019	0	0	4.0662e-05	0.000286993	1.35927e-05	0.000136649	6.76553e-05	0	5.76577e-05	0.000299973	0	0.000833128	0	0	7.36675e-05	1.66931e-05	0	0.000151485	0.000118892	0	9.50781e-05	0.000530966	3.08219e-05	1.53424e-05	0	0.000274234	3.85609e-05	0.00024971	7.21178e-05	2.88721e-05	0.000112221
Family_XIII_UCG_001	0	4.06725e-05	0	0	0	0	0	0	0	2.80458e-05	0	0	0.000608567	0	0	0	0	0	0	0	0	0	1.35927e-05	0	0	0	0	0	1.57699e-05	1.36578e-05	0	6.23101e-05	0	0	0	0	0	0	7.92318e-05	0.000231447	3.08219e-05	0	0	1.44333e-05	0	0.000279088	0	0	0.000280552
Fenollaria	0.000124094	0	0	0	0	0	0	0	4.21484e-05	0	0	0	5.53243e-05	0	0.000114539	0	0	0	0	0	4.0662e-05	0	0	0	0.000148842	0	0.000720721	2.72702e-05	0	0	0	0	0	0	0	1.68316e-05	0	0	0	0.00871329	0	0	0	0	1.92805e-05	2.93776e-05	0.000375013	1.44361e-05	0
Flavonifractor	0	6.77874e-05	8.0201e-05	0.000366022	0	5.68521e-05	7.49344e-05	0.000291732	0.0014752	0.000126206	4.20775e-05	1.3962e-05	0.000138311	1.79093e-05	0.000200444	0	0	2.96683e-05	0.000181255	1.67935e-05	0.000433728	0.000186546	0.000421373	0.000464608	0.00204319	0	4.32432e-05	0.00103627	1.57699e-05	5.46314e-05	1.43664e-05	0.000280396	1.84169e-05	0	0	0.000151485	0	0	0	0.00137507	0	1.53424e-05	0	1.44333e-05	3.85609e-05	0.00061693	0.000144236	0.000490826	0.00123443
Fournierella	0.000403307	0	0	0.00197089	0	0.000511669	0.000344698	0	0	1.40229e-05	0	2.7924e-05	0.000193635	1.79093e-05	0	1.64198e-05	0	0.00317451	0	0	1.3554e-05	0.000229595	1.35927e-05	0.000109319	0	0	1.44144e-05	2.72702e-05	0	0	0	0	0	0	0	1.68316e-05	0.000148615	1.3308e-05	1.58464e-05	0	0	1.53424e-05	0	2.88667e-05	3.85609e-05	0.00135137	1.44236e-05	0	0
Fructilactobacillus	0.00127197	0.000230477	9.35679e-05	0	0.000978101	0.00061116	0	0	0	2.80458e-05	0	0	0	0.00175511	0	0.00226594	0.00190978	0.000163176	0.00167661	0.00201521	0.000108432	0.000961428	1.35927e-05	0.000218639	5.41243e-05	0.00198574	0.000273874	1.36351e-05	0.00176623	0	0.00186763	0.00190046	0.00088401	0.0021701	0.00211868	0.000605938	0.00118892	0	0.000412005	4.08436e-05	0.00151027	0.00084383	0.00262946	0.000635067	0.00084834	2.93776e-05	1.44236e-05	0	0.000448883
Furfurilactobacillus	0.00268354	0.00037961	4.01005e-05	8.44666e-05	0.00187469	0.00102334	4.49607e-05	1.45866e-05	1.40495e-05	0	0	0	1.38311e-05	0.00324158	1.43174e-05	0.0041378	0.0043185	0.000489527	0.00326259	0.00413119	0.000311742	0.00147802	2.71854e-05	0.000601257	9.47175e-05	0.00320426	0.000634234	1.36351e-05	0.00307513	2.73157e-05	0.00331863	0.00327128	0.00255995	0.00370587	0.00395062	0.00198613	0.00178338	2.66159e-05	0.00166387	5.44581e-05	0.00306678	0.0022093	0.00451938	0.00200624	0.00304631	0	1.44236e-05	0	0.00108013
Fusicatenibacter	0.000217165	0.00292842	0.000628241	0.000605344	0.000108678	0.000710651	0.000779318	0.00166287	0.00102561	0.00172481	0.00112207	0.00166148	0.00349926	0.000591006	0.000672919	3.28396e-05	0	0.00106806	0.00134431	0	0.00119275	0.00044484	0.00114179	0.00204974	0.000703616	0.001038	0.00134054	0.000109081	0.00179777	0.00311399	4.30991e-05	0.000155775	0.000460422	0.00021701	1.59299e-05	0.00267623	0.000282368	0.000918249	0.000301081	0.000558195	0.00016952	0.000429586	3.28682e-05	0.0026413	0.000115683	0.000543486	0.00134139	0.00223759	0.00803782
Fusobacterium	0	2.7115e-05	2.67337e-05	0	0	8.52781e-05	4.49607e-05	0	2.8099e-05	4.20687e-05	0	1.3962e-05	0	0	1.43174e-05	1.64198e-05	1.72052e-05	2.96683e-05	1.51046e-05	0	0.000487944	1.43497e-05	0	1.36649e-05	0	0	2.88288e-05	2.72702e-05	1.57699e-05	1.36578e-05	1.43664e-05	1.55775e-05	0.00029467	1.66931e-05	4.77897e-05	3.36632e-05	0	0	3.16927e-05	0.00325387	3.08219e-05	0.000122739	0	0	0.000192805	0	1.44236e-05	1.44361e-05	0
GCA_900066575	0.000186142	5.42299e-05	2.67337e-05	0.000464566	1.35847e-05	0.00014213	0.000104908	0.000510532	1.40495e-05	0.000434709	0	0.000195468	0.000968175	0.000179093	5.72697e-05	8.20991e-05	1.72052e-05	0.000341186	3.02092e-05	0.000117554	4.0662e-05	0.000272644	0.000163112	0.000191309	6.76553e-05	0	0.000288288	0.000122716	3.15398e-05	0.000259499	0	6.23101e-05	5.52507e-05	6.67724e-05	0	0.000134653	4.45845e-05	1.3308e-05	6.33854e-05	9.53016e-05	3.08219e-05	3.06847e-05	6.57365e-05	1.44333e-05	3.85609e-05	7.34441e-05	4.32707e-05	1.44361e-05	0
Gardnerella	0.00119441	0.00016269	0.000120302	1.40778e-05	0.000298864	0.00046903	4.49607e-05	8.75197e-05	0	5.60915e-05	5.61033e-05	1.3962e-05	0	0.000394004	5.72697e-05	3.28396e-05	3.44104e-05	0.000385688	0.000921381	1.67935e-05	0.00020331	0.000746183	8.15561e-05	0.000245969	0.00025709	0.000917652	0.00273874	6.81756e-05	0.00105658	6.82892e-05	0.00169523	0.000654257	0.0552691	0.000367248	0.000764636	0.0404127	0.000535014	2.66159e-05	0.0225494	8.16871e-05	0.00188013	0.0136854	0	0.00200624	0.0604249	2.93776e-05	5.76942e-05	0	0.000519021
Gluconobacter	0.00130299	0.00010846	4.01005e-05	0	0.000665652	0.000255834	0	4.37598e-05	0	4.20687e-05	4.20775e-05	2.7924e-05	0	0.00180884	4.29523e-05	0.00272569	0.00211624	0.000163176	0.00143494	0.00214956	0.00013554	0.000473539	2.71854e-05	0.000177644	0.00012178	0.00139904	0.000230631	1.36351e-05	0.00159276	0	0.000976913	0.00154218	0.0010866	0.00210333	0.00221426	0.000656433	0.000639044	2.66159e-05	0.00052293	1.36145e-05	0.00154109	0.00108931	0.00213644	0.000851567	0.00115683	4.40665e-05	1.44236e-05	4.33082e-05	0.000364718
Glutamicibacter	0.000108583	1.35575e-05	0.000106935	0	8.15084e-05	4.26391e-05	1.49869e-05	0	4.21484e-05	4.20687e-05	5.61033e-05	1.3962e-05	2.76621e-05	0.000179093	5.72697e-05	0.000197038	0.000275283	8.90049e-05	0.000120837	0.000352663	2.7108e-05	5.73987e-05	1.35927e-05	1.36649e-05	2.70621e-05	0.000135391	2.88288e-05	9.54459e-05	0.000268088	0	0.000143664	0.000202508	0.000423588	0.000350555	0.000111509	0.000218811	7.43075e-05	1.3308e-05	9.50781e-05	2.7229e-05	0.000215753	0.000214793	0.00027938	0.000101033	0.000289207	0	2.88471e-05	2.88721e-05	4.20828e-05
Granulicatella	1.55118e-05	2.7115e-05	4.01005e-05	0	0.000176602	4.26391e-05	1.49869e-05	0	0.000351237	1.40229e-05	0.00016831	1.3962e-05	1.38311e-05	0	2.86348e-05	0	0	1.48342e-05	1.51046e-05	0	0.000149094	1.43497e-05	8.15561e-05	0	4.05932e-05	0	0	0.00053177	0	6.82892e-05	0.000100565	3.11551e-05	0.000644591	0	0	0	0	2.66159e-05	3.16927e-05	1.36145e-05	0.00032363	4.60271e-05	1.64341e-05	2.88667e-05	3.85609e-05	5.87553e-05	0.000129812	0	0
Haemophilus	0.000806614	0.00340293	0.00076191	1.40778e-05	0	0.000909634	4.49607e-05	0.000189626	4.21484e-05	1.40229e-05	1.40258e-05	5.5848e-05	1.38311e-05	1.79093e-05	0.00121698	0.000131359	6.88208e-05	0.0194327	0.000120837	8.39673e-05	0.000149094	2.86993e-05	0.0170316	9.56546e-05	4.05932e-05	0.000165478	5.76577e-05	2.72702e-05	0.00187662	6.82892e-05	0	0.000638679	0.000349921	1.66931e-05	6.37196e-05	0	5.9446e-05	0.000346007	7.92318e-05	8.16871e-05	0.0019726	0.000705749	0	0.000144333	0.00044345	0.000190955	0.000634637	0.00701592	1.40276e-05
Helicobacter	0	5.42299e-05	0.000280704	1.40778e-05	4.07542e-05	1.4213e-05	8.99213e-05	0.000175039	5.61979e-05	4.20687e-05	2.80517e-05	0.000181506	0.000110649	0	0.000214761	0	0	0.000267015	0	1.67935e-05	4.0662e-05	0	2.71854e-05	5.46597e-05	2.70621e-05	1.50435e-05	1.44144e-05	5.45405e-05	0	4.09735e-05	2.87327e-05	1.55775e-05	9.20844e-05	5.00793e-05	0	6.73265e-05	1.48615e-05	5.32318e-05	0	6.80726e-05	1.54109e-05	6.13695e-05	0	1.44333e-05	7.71218e-05	0.000146888	5.76942e-05	0.000129924	0
Holdemanella	0	4.06725e-05	8.0201e-05	0.00153448	0.00225507	0.00171978	0.00635444	0	2.8099e-05	4.20687e-05	2.80517e-05	0.00275051	8.29864e-05	1.79093e-05	4.29523e-05	4.92595e-05	6.88208e-05	0.0152198	1.51046e-05	1.67935e-05	0	1.43497e-05	6.79634e-05	0.000177644	0.000108249	0.000165478	0.00472793	9.54459e-05	1.57699e-05	0.00173455	0	0	0.000257836	3.33862e-05	0.000223019	0.0195078	4.45845e-05	1.3308e-05	0	0	7.70547e-05	4.60271e-05	0	1.44333e-05	3.85609e-05	8.81329e-05	0.00755795	1.44361e-05	1.40276e-05
Holdemania	1.55118e-05	9.49024e-05	0	7.03888e-05	0	5.68521e-05	4.49607e-05	0.000277146	0	0.000112183	0.000687266	0.000125658	0.000221297	0	1.43174e-05	0	0	7.41708e-05	0	1.67935e-05	9.48779e-05	0.000774882	0.000135927	0.000478273	0.00119073	0	0.000100901	0.000449959	0	0.000109263	0	4.67326e-05	3.68338e-05	0	0	5.04948e-05	0.000133753	0	6.33854e-05	0.00014976	1.54109e-05	3.06847e-05	0	0	3.85609e-05	0.000117511	4.32707e-05	0.000317593	0.000196386
Howardella	0	0	0.000133668	0	0	0	0	0	0	0	0	1.3962e-05	0	0.000268639	0.000658601	0	0	0	0	0	0	0	0	0	0	0	0	0	0	0.000751181	0	0	1.84169e-05	0.000133545	0	0	0.00307633	0	0	0	0	1.53424e-05	0	0.00118353	5.78414e-05	0	0	0	0
Hungatella	1.55118e-05	0	8.0201e-05	8.44666e-05	2.71695e-05	2.8426e-05	1.49869e-05	2.91732e-05	0.000576029	0.000126206	0.00123427	4.1886e-05	6.91553e-05	0	8.59045e-05	0	0	0	0	0	9.48779e-05	4.3049e-05	2.71854e-05	0.000177644	0.000148842	3.0087e-05	1.44144e-05	0.000136351	0.000173469	0	2.87327e-05	0	1.84169e-05	0	0.000637196	0	7.43075e-05	0	0	0.004874	1.54109e-05	3.06847e-05	1.64341e-05	0.0001299	0.000115683	2.93776e-05	2.88471e-05	1.44361e-05	0.000168331
Ilumatobacter	1.55118e-05	0	1.33668e-05	0	1.35847e-05	1.4213e-05	0	0	0	0	0	1.3962e-05	0	0	0	0	0	1.48342e-05	4.53138e-05	0	0	7.17484e-05	0	2.73299e-05	1.35311e-05	1.50435e-05	8.64865e-05	0	1.57699e-05	1.36578e-05	7.18319e-05	1.55775e-05	0.00158385	0	4.77897e-05	0.000875244	0	0	0.000744779	0	7.70547e-05	0.000352874	0	8.66001e-05	0.00175452	0	0	0	0
Incertae_Sedis	0.000108583	0.000230477	4.01005e-05	0.00183011	5.4339e-05	0.00156343	0.0012589	0.00160453	0.00119421	2.80458e-05	0	0.00149393	0.000290452	0.00025073	0.000873362	0	1.72052e-05	0.00198778	0.000166151	0	0.000623484	0.00152107	0.00141364	0.000409948	0.000446525	1.50435e-05	1.44144e-05	0.000668121	3.15398e-05	0.000628261	7.18319e-05	0.000249241	0.000110501	3.33862e-05	1.59299e-05	0.000336632	0.000148615	0.000173003	3.16927e-05	0.00160651	0.000123287	3.06847e-05	1.64341e-05	0.0003464	0.000192805	0.00185079	0.000778872	2.88721e-05	0.00200595
Intestinibacter	0.000434331	0.0012744	0.000441106	7.03888e-05	1.35847e-05	0.00559993	4.49607e-05	0.00405508	7.02474e-05	4.20687e-05	0.000238439	0.00146601	0.000235128	0.00098501	0.00147469	0.000147778	8.60259e-05	0.000326351	6.04184e-05	0.000201521	0.000230418	4.3049e-05	0.00248746	0.000150314	0.00286859	0.000150435	4.32432e-05	2.72702e-05	0.000331168	5.46314e-05	2.87327e-05	1.55775e-05	0.000515673	0.000116852	9.55795e-05	0.000319801	0.00102544	0.000173003	0.000396159	2.7229e-05	0.000200342	0.000352874	9.86047e-05	0.0045465	0.000732657	0.00402474	0.00862529	0.00792539	0.000533049
Intestinimonas	3.10236e-05	1.35575e-05	5.34674e-05	0.000140778	0	1.4213e-05	4.49607e-05	1.45866e-05	0	0	0	2.7924e-05	1.38311e-05	7.16371e-05	0.000171809	4.92595e-05	0	4.45025e-05	0	0	0	1.43497e-05	0	0.000122984	0	0	0.000115315	0	0	6.82892e-05	0	0	0	0	0	0.00010099	5.9446e-05	0	0	0	1.54109e-05	0	1.64341e-05	0	9.64023e-05	4.40665e-05	2.88471e-05	2.88721e-05	0
Isoptericola	0.000155118	4.06725e-05	1.33668e-05	4.22333e-05	0.000135847	0.000113704	1.49869e-05	0	0	2.80458e-05	0	0	0	0.000626825	0	0.000492595	0.000395719	5.93366e-05	0.000332301	0.000470217	2.7108e-05	0.000129147	0	9.56546e-05	4.05932e-05	0.000330956	5.76577e-05	0	0.000346937	0	0.000258595	0.000327128	0.000313087	0.000450714	0.000398248	0.000168316	8.91689e-05	1.3308e-05	7.92318e-05	0	0.000477739	0.000245478	0.000443721	0.000202067	0.000173524	1.46888e-05	0	0	7.0138e-05
Izhakiella	0.000294724	0	0	0	0	4.26391e-05	0	1.45866e-05	0	0	0	0	0	0.00025073	0	0.000525434	0.000378514	0	0.000271883	0.000235108	2.7108e-05	8.6098e-05	1.35927e-05	1.36649e-05	0	0.000270783	2.88288e-05	0	0.000268088	0	0.000129297	0.000264818	0	0.000300476	0.000334528	1.68316e-05	0.000222922	2.66159e-05	1.58464e-05	0	0.000215753	0.000107397	0.000312248	0.000144333	1.92805e-05	0	0	0	2.80552e-05
Klebsiella	0.00781795	0.00437907	0.077541	0.000337866	0.0242216	0.00744763	0.0627201	0.00735165	0.020442	0.0293219	0.00116414	0.256845	0.00210232	0.0103336	0.00750233	0.0101803	0.0108393	0.0714858	0.00779397	0.0104623	0.00279212	0.0633395	0.00035341	0.00721509	0.00211085	0.00794296	0.00268108	0.103627	0.00887845	0.0261138	0.00461161	0.00853649	0.00515673	0.0118688	0.0104182	0.00427523	0.0112204	0.0209467	0.0671727	0.000258676	0.00921574	0.00581476	0.0108301	0.00894868	0.00854124	0.00301121	0.0249672	0.00054857	0.00276344
Kocuria	0.00305583	0.000366052	8.0201e-05	5.63111e-05	0.0014264	0.000852781	1.49869e-05	4.37598e-05	4.21484e-05	0	1.40258e-05	2.7924e-05	2.76621e-05	0.00601752	1.43174e-05	0.00505731	0.00528199	0.000326351	0.0039423	0.00544108	0.00027108	0.00134887	2.71854e-05	0.000300629	0.000202966	0.00437765	0.000562162	0	0.00405286	1.36578e-05	0.00298821	0.00384765	0.00134443	0.00525833	0.00520908	0.00122871	0.00190227	1.3308e-05	0.000776471	2.7229e-05	0.0032363	0.00164163	0.00535752	0.00140003	0.00150388	1.46888e-05	0	0	0.000617215
Kosakonia	0.0325283	0.00343004	0.00284714	0.000408255	0.00551541	0.010205	0.00112402	0.000495945	0.0014471	0.000518847	0.000378698	0.000335088	0.00012448	0.0612139	0.000257714	0.0522643	0.0590482	0.00338219	0.0404199	0.0558886	0.0025346	0.0130295	0.00035341	0.00400383	0.00171845	0.0378494	0.00701982	0.00102263	0.0455434	0.000286815	0.0191216	0.0436638	0.0101661	0.0560387	0.0522023	0.00602572	0.0194388	0.000758554	0.00450036	0.000326748	0.0388972	0.0177051	0.0548407	0.0252872	0.0105464	0.000396598	0.000259624	0.000173233	0.00364718
Kroppenstedtia	0.00114787	0.000122017	4.01005e-05	5.63111e-05	0.0008015	0.000454817	1.49869e-05	2.91732e-05	1.40495e-05	0	0	0	1.38311e-05	0.00238193	1.43174e-05	0.00236445	0.00249475	0.000192844	0.00167661	0.00250223	0.00013554	0.000717484	0	0.000382618	4.05932e-05	0.00225652	0.000230631	1.36351e-05	0.00154545	0	0.0015372	0.00190046	0.000386755	0.00205325	0.002501	0.000336632	0.000653906	1.3308e-05	0.000253542	2.7229e-05	0.00157192	0.000475613	0.00282667	0.00105363	0.00044345	0	0	1.44361e-05	0.000406801
Lachnoclostridium	0.000791102	0.0020743	0.00981126	0.000774277	0.00434712	0.000511669	0.00137879	0.00227551	0.00195288	0.00053287	0.0279535	0.00273655	0.000843695	0.00102083	0.00104517	0.000689633	0.000447335	0.0017356	0.000513556	0.000419836	0.00761734	0.00132017	0.00418655	0.00750205	0.00235441	0.000556609	0.00595315	0.0167167	0.0030909	0.00357836	0.00182453	0.00216528	0.00114185	0.003155	0.000637196	0.000572275	0.000222922	0.000106464	0.0373023	0.00303604	0.00135616	0.00293039	0.000690233	0.000274234	0.00923534	0.00226208	0.00125485	0.00187669	0.00339468
Lachnospira	0.000899685	0.0172722	0.000227236	0.00318158	0.000393958	0.00380909	0.000869239	0.00776008	0.000168594	0.0131535	0.00862589	0.0113232	0.000497918	0.000268639	0.00127425	9.85189e-05	5.16156e-05	0.00100872	0.00237142	0.000117554	0.00569268	0.00954253	0.00316709	0.000327958	0.0440301	0.000150435	0.00518919	0.00141805	0.00113543	0.00707476	1.43664e-05	0.00113716	0.00088401	0.000434021	3.18598e-05	0.000774254	0.000460706	0.00838401	0.000412005	0.00386652	9.24656e-05	0.000920542	0	0.0045032	0.000212085	0.0119567	0.00389436	0.0154466	0.00206206
Lachnospiraceae_ND3007_group	6.20472e-05	0.00132863	0.000441106	0.00554664	6.79237e-05	0.00137866	0.000404646	0.00100648	0	0.00175286	0.00084155	0.00034905	0.000110649	0.000143274	5.72697e-05	1.64198e-05	1.72052e-05	0.00212128	0.000830753	0	0.0032394	0.00312823	0.00379236	0.000191309	0.00174551	0	0.000172973	0.0027543	1.57699e-05	0.00230818	1.43664e-05	0.00160449	0.000257836	0.000984893	3.18598e-05	5.04948e-05	7.43075e-05	5.32318e-05	0.000110924	0.000517352	0.000292808	0.000490956	1.64341e-05	0.000274234	0.000154244	0.000734441	0.000158659	0.00153022	0.00070138
Lachnospiraceae_NK4A136_group	0.000263701	0.00326735	0.000721809	0.0206521	0.000135847	0.00595526	0.00314725	0.00625766	0.0121669	0.000897465	0.000126233	0.00340673	0.000511749	0.00315203	0.0118978	0.000476175	0.000326899	0.00275915	0.00036251	0.000604564	0.000325296	0.0086672	0.0154685	0.00120251	0.00186729	7.52174e-05	0.00425225	0.000190892	0.000268088	0.00590019	0.000201129	0.00482904	0.00088401	0.000517486	0.000366388	0.00112772	0.00321008	1.3308e-05	0.000269388	0.000816871	0.00576369	0.000168766	0.000410853	0.00158767	0.000578414	0.00452416	0.00160102	0.00508149	0
Lachnospiraceae_UCG_001	0.000449843	0.000176247	0	0.000591266	0	0.00126496	0.000749344	0	0	0.000168275	0	0.000935454	8.29864e-05	0	0	0	0	5.93366e-05	0.000241674	0	5.4216e-05	0.000373091	0.000312632	0	0	0	0	0	0	0.000109263	0	0	3.68338e-05	0	0	0.000218811	0.000118892	0	3.16927e-05	9.53016e-05	0	0	0	0.000144333	0	0.000235021	0.000894261	1.44361e-05	0
Lachnospiraceae_UCG_003	0.00172181	0.000338937	8.0201e-05	0.000985444	0	0	0.00319221	0.000408425	0	0.000238389	0	0.000600366	1.38311e-05	0	2.86348e-05	0	0	0	0	0	0	0	0.00163112	0.000847226	0	0	1.44144e-05	0	0	0	0	0	0	0	0	3.36632e-05	0	0	0	6.80726e-05	0.000246575	1.53424e-05	0	0.000144333	0	7.34441e-05	0.000389436	0.00625081	0
Lachnospiraceae_UCG_004	1.55118e-05	9.49024e-05	2.67337e-05	0.000478644	5.4339e-05	0.000113704	2.99738e-05	0.000306319	0.000224792	0.000434709	0.000813498	0.000167544	0.000179804	1.79093e-05	0.000100222	1.64198e-05	0	0.000296683	0.000800544	0	0	8.6098e-05	0.000421373	5.46597e-05	0.00772624	0.000285826	5.76577e-05	0.00548132	9.46193e-05	0.00426125	4.30991e-05	7.78877e-05	9.20844e-05	1.66931e-05	0	0.000134653	1.48615e-05	2.66159e-05	0.000221849	0.000925787	0	1.53424e-05	0	1.44333e-05	5.78414e-05	0.00036722	2.88471e-05	4.33082e-05	9.81932e-05
Lachnospiraceae_UCG_010	0.000186142	0.000149132	5.34674e-05	0.00157671	0	0.00014213	0.000554515	0.000204213	0.000252891	0.000897465	0.000575059	0.000335088	0.00114798	1.79093e-05	1.43174e-05	3.28396e-05	3.44104e-05	0.00155759	1.51046e-05	1.67935e-05	0.000121986	0.00510848	0.000135927	0.00117518	9.47175e-05	0	0.00184505	0.00332697	1.57699e-05	0.00133847	7.18319e-05	0.000716567	0.000184169	1.66931e-05	1.59299e-05	0.000117821	4.45845e-05	0	0.000237695	0.00209664	1.54109e-05	4.60271e-05	0	2.88667e-05	3.85609e-05	0.000528797	7.21178e-05	0.000274285	0.000504994
Lacticaseibacillus	0.00665457	0.00119306	0.000213869	0.000225244	0.00474107	0.00288524	7.49344e-05	7.29331e-05	5.61979e-05	2.80458e-05	9.81808e-05	5.5848e-05	4.14932e-05	0.0100471	8.59045e-05	0.00988473	0.00939403	0.00154275	0.00815648	0.00915243	0.00113854	0.00358742	6.79634e-05	0.00135283	0.000960706	0.0087553	0.00266667	0.000190892	0.00892576	5.46314e-05	0.00782967	0.00760184	0.0124866	0.00889742	0.00927121	0.00765839	0.00469623	1.3308e-05	0.00621177	0.000136145	0.00725855	0.00760981	0.00961396	0.00541251	0.0119539	7.34441e-05	1.44236e-05	2.88721e-05	0.00251094
Lactiplantibacillus	0.00890378	0.00124729	0.000200503	0.000211166	0.00680596	0.00341113	8.99213e-05	0.000102106	5.61979e-05	9.81602e-05	0.000140258	1.3962e-05	4.14932e-05	0.0105665	0.000100222	0.0142196	0.0135233	0.00179493	0.011404	0.0137706	0.00120631	0.00492194	0.000122334	0.00162613	0.00108249	0.0120348	0.00292613	9.54459e-05	0.011859	0.000150236	0.0118666	0.0104369	0.0104055	0.0125866	0.0131103	0.00717027	0.0067917	7.98478e-05	0.00581561	0.000163374	0.0094469	0.00805474	0.0130816	0.00590324	0.0115876	0.000102822	8.65414e-05	8.66163e-05	0.00293177
Lactobacillus	0.137636	0.0234951	0.00961076	0.00311119	0.0992637	0.0541374	0.00149869	0.00191085	0.00081487	0.000813327	0.00176726	0.0012845	0.0014246	0.227806	0.00200444	0.197235	0.199116	0.0308105	0.172087	0.199725	0.0206698	0.0815922	0.00289524	0.0298852	0.0191194	0.166697	0.0593441	0.00179984	0.179382	0.00333251	0.164409	0.1671	0.217006	0.188031	0.199044	0.157291	0.102752	0.00178327	0.129179	0.00194688	0.149255	0.161969	0.197604	0.127216	0.232002	0.00127793	0.000533672	0.000678495	0.0542027
Lactococcus	0.000496378	5.42299e-05	6.68342e-05	4.22333e-05	0.000298864	0.00014213	1.49869e-05	2.91732e-05	0.000702474	0	2.80517e-05	0	0	0.00048355	0.000200444	0.000755312	0.000739823	0.000237346	0.000483347	0.00092364	8.1324e-05	0.000301343	0	0.000150314	2.70621e-05	0.000646869	7.20721e-05	0	0.000599256	0.000218525	0.000589021	0.000545214	0.000497256	0.000667724	0.000716846	0.000319801	0.000416122	0	0.000364466	0	0.000508561	0.000398901	0.000772404	0.000245367	0.000559133	5.87553e-05	0	0	0.000154304
Lapidilactobacillus	0.000155118	2.7115e-05	0	1.40778e-05	5.4339e-05	7.10651e-05	0	0	0	0	0	0	0	0.000179093	0	0.000229878	0.000292488	1.48342e-05	0.000241674	0.000117554	2.7108e-05	0.000157846	0	4.09948e-05	1.35311e-05	0.000240696	4.32432e-05	0	0.000157699	0	0.000258595	0.000218086	0.000110501	0.000250396	0.000175229	0.00010099	0.000118892	2.66159e-05	6.33854e-05	0	0.000200342	0.000138081	0.000262946	5.77334e-05	5.78414e-05	0	0	0	7.0138e-05
Latilactobacillus	0.00184591	0.000284707	2.67337e-05	7.03888e-05	0.00154866	0.000767503	2.99738e-05	2.91732e-05	0	4.20687e-05	0	0	0	0.0029013	0	0.00290631	0.00290768	0.000563698	0.00283966	0.0033419	0.000352404	0.00137757	1.35927e-05	0.000423613	0.000324746	0.00251226	0.000836036	1.36351e-05	0.00269665	1.36578e-05	0.00245665	0.00249241	0.00348079	0.00270428	0.00317005	0.00203663	0.00164963	3.99239e-05	0.00179064	4.08436e-05	0.00195719	0.00217862	0.00343473	0.00152993	0.00381753	1.46888e-05	0	4.33082e-05	0.00102402
Lentilactobacillus	0.0115873	0.00229121	0.00029407	0.0003801	0.00931913	0.00500298	0.000119895	0.000145866	4.21484e-05	0.000112183	4.20775e-05	2.7924e-05	6.91553e-05	0.017569	0.000100222	0.0185544	0.0179106	0.00290749	0.0162525	0.0183049	0.00196533	0.00813626	0.000271854	0.00278765	0.00165079	0.0165478	0.00570811	0.000245432	0.0166845	0.00019121	0.0171822	0.0142067	0.0242366	0.017027	0.0184628	0.016091	0.00979372	0.000106464	0.0138814	0.000204218	0.0141626	0.0150509	0.0187513	0.0110704	0.0243705	0.000146888	2.88471e-05	8.66163e-05	0.0048255
Lentimicrobium	3.10236e-05	1.35575e-05	1.33668e-05	2.81555e-05	0.000203771	2.8426e-05	0	0	0	0	0	1.3962e-05	0	0.000465641	0	0.00142852	0.00135921	2.96683e-05	4.53138e-05	0.0012763	1.3554e-05	0	0	4.09948e-05	0	1.50435e-05	0	0	3.15398e-05	0	1.43664e-05	0	0	0.00108505	1.59299e-05	1.68316e-05	5.9446e-05	0	0	0	3.08219e-05	0	0.00156124	7.21667e-05	7.71218e-05	0	0	0	0
Leuconostoc	0.0137745	0.00185738	0.000387638	0.000366022	0.00876216	0.00523039	0.000179843	7.29331e-05	8.42969e-05	2.80458e-05	0.000112207	1.3962e-05	1.38311e-05	0.0117306	0.00038657	0.0247118	0.024397	0.00225479	0.0183974	0.024636	0.00140962	0.00662955	0.000244668	0.00235037	0.00104189	0.018338	0.00436757	0.000149986	0.0206743	0.000669234	0.0173833	0.0184905	0.0188036	0.017294	0.0236241	0.0123039	0.00949649	0.000292775	0.0095712	0.000204218	0.0170137	0.0139769	0.0252099	0.0106229	0.020283	0.000102822	2.88471e-05	5.77442e-05	0.00408203
Levilactobacillus	0.00662354	0.00107104	9.35679e-05	0.000140778	0.00528446	0.00244464	5.99475e-05	1.45866e-05	2.8099e-05	4.20687e-05	2.80517e-05	1.3962e-05	2.76621e-05	0.00872182	7.15871e-05	0.0105579	0.0101683	0.00146858	0.00928933	0.0107982	0.00121986	0.00416141	4.0778e-05	0.00135283	0.000798333	0.00886061	0.00243604	0.000109081	0.00854728	8.19471e-05	0.00859109	0.00848976	0.00994512	0.00988231	0.00951016	0.00669898	0.00511235	7.98478e-05	0.00534022	6.80726e-05	0.0074743	0.00676598	0.0107479	0.00534034	0.0107007	5.87553e-05	1.44236e-05	1.44361e-05	0.00245483
Ligilactobacillus	0.000884173	0.000203362	0.000441106	1.40778e-05	0.000421127	0.000454817	7.49344e-05	8.75197e-05	0.000112396	0.00019632	0.000196362	2.7924e-05	0.000152142	0.000716371	0.000143174	0.00108371	0.000722618	0.0012164	0.000679707	0.00100761	0.000352404	0.000358742	0.00149519	0.000232304	9.47175e-05	0.000902609	0.000230631	0.000177257	0.00116697	0.0297058	0.000703952	0.000841187	0.000957678	0.000851348	0.00103544	0.000706928	0.000445845	0.000279467	0.000396159	5.44581e-05	0.00100171	0.000613695	0.00105178	0.000490734	0.00150388	4.40665e-05	0.000100965	0.000144361	0.000224442
Limosilactobacillus	0.0142398	0.00202007	0.000521307	0.000239322	0.0101206	0.00564257	0.000224803	0.000262559	0.000295039	0.000224366	4.20775e-05	0.000237354	0.000193635	0.0195927	0.000243396	0.0235624	0.0241561	0.00302617	0.0187297	0.0227215	0.0020331	0.00840891	0.000190298	0.00281498	0.00125839	0.0196919	0.00399279	0.000449959	0.0208478	0.00211697	0.0175126	0.017883	0.0114369	0.0203489	0.0212186	0.00659799	0.0104625	0.000372623	0.00591069	0.000190603	0.0165205	0.00879118	0.0234186	0.0113735	0.0104886	0.000293776	2.88471e-05	0.000173233	0.00552688
Loigolactobacillus	0.00305583	0.000474512	9.35679e-05	7.03888e-05	0.00215997	0.00120811	2.99738e-05	1.45866e-05	0	1.40229e-05	2.80517e-05	1.3962e-05	0	0.00363558	2.86348e-05	0.00494237	0.00443894	0.000682371	0.00368552	0.00441668	0.00054216	0.00189416	2.71854e-05	0.000546597	0.000297683	0.00367061	0.000951351	5.45405e-05	0.00381631	6.82892e-05	0.0033761	0.00439287	0.00434638	0.00390618	0.00430108	0.00306335	0.00234812	3.99239e-05	0.00244034	2.7229e-05	0.00346746	0.00320655	0.00447008	0.002598	0.00431882	4.40665e-05	0	1.44361e-05	0.00099596
Luteimonas	0.000186142	4.06725e-05	1.33668e-05	0	5.4339e-05	0	0	0	0	0	0	0	0	8.95464e-05	0	0.000328396	0.000292488	0	0.000286987	0.000403043	1.3554e-05	4.3049e-05	0	0	0	0.000225652	0	0	0.000157699	0	0.000129297	0.000155775	7.36675e-05	0.000250396	0.000270808	1.68316e-05	0.000118892	0	1.58464e-05	0	0.000246575	0.000138081	0.000180775	0.000187634	3.85609e-05	0	0	0	2.80552e-05
Lysobacter	0.000480866	2.7115e-05	0	0	0.000244525	9.94912e-05	0	0	0	1.40229e-05	0	0	0	0.000465641	0	0.000985189	0.000688208	1.48342e-05	0.000589079	0.00087326	4.0662e-05	0.000243944	1.35927e-05	6.83247e-05	0	0.000541565	0.000115315	0	0.000646565	0	0.000430991	0.000732144	0.000147335	0.00103497	0.000812425	0.000117821	0.000386399	0	9.50781e-05	1.36145e-05	0.000678081	0.000168766	0.000772404	0.0002165	0.000212085	1.46888e-05	0	0	2.80552e-05
Macrococcus	0.00051189	6.77874e-05	0	1.40778e-05	0.000326034	0.000127917	0	0	1.40495e-05	0	1.40258e-05	0	0	0.00050146	1.43174e-05	0.000820991	0.000653797	2.96683e-05	0.000528661	0.000654945	1.3554e-05	0.000344392	1.35927e-05	0.000122984	1.35311e-05	0.000752174	8.64865e-05	0	0.000709645	0	0.000545922	0.000638679	0.000165752	0.000751189	0.000716846	1.68316e-05	0.000371537	0	1.58464e-05	0	0.000523972	0.000122739	0.000805272	0.000360834	0.000173524	0	0	0	9.81932e-05
Marvinbryantia	4.65354e-05	9.49024e-05	2.67337e-05	0.000168933	0	0.00075329	0.000374672	0.000102106	5.61979e-05	1.40229e-05	5.61033e-05	0.00013962	0	3.58185e-05	0.000100222	0	0	0.000400522	0	1.67935e-05	5.4216e-05	1.43497e-05	5.43707e-05	0.000109319	8.11864e-05	1.50435e-05	0.000100901	4.09054e-05	0	8.19471e-05	0	3.11551e-05	1.84169e-05	5.00793e-05	0	6.73265e-05	0.00029723	0	1.58464e-05	2.7229e-05	0.00016952	4.60271e-05	0	0.000158767	5.78414e-05	0.000235021	4.32707e-05	0.000346465	0
Massilia	0.000263701	4.06725e-05	0.000147035	0	5.4339e-05	9.94912e-05	1.49869e-05	0	0	0	1.40258e-05	0	1.38311e-05	0.00025073	2.86348e-05	0.000706052	0.000636592	7.41708e-05	0.00055887	0.000755706	6.777e-05	0.000114797	0.000108741	2.73299e-05	5.41243e-05	0.000451304	8.64865e-05	4.09054e-05	0.000520406	5.46314e-05	0.000344793	0.000529636	0.00058934	0.000600952	0.000716846	0.000302969	0.000193199	5.32318e-05	0.000269388	6.80726e-05	0.000585615	0.000383559	0.000706667	0.000230934	0.000655535	1.46888e-05	0	0	4.20828e-05
Megamonas	0.000837638	0.0975597	0.358312	0.0411352	0.000176602	0.000113704	0.000164856	4.37598e-05	2.8099e-05	0.000126206	0.000589085	0.000530556	0.000525581	0.000214911	0.00270599	0.000246297	5.16156e-05	0.000904883	6.04184e-05	0.00038625	0.000189756	1.43497e-05	0.000326224	0.000573927	0.000500649	0.0109667	0.195171	0.120316	0.000473097	0.000942391	0.00103438	0.00116832	0.00104976	0.000100159	7.96495e-05	0.000134653	2.9723e-05	0.000266159	7.92318e-05	9.53016e-05	0.0283407	0.154758	4.93024e-05	0.000202067	0.000154244	0.0260727	8.65414e-05	0.000101052	5.61104e-05
Megasphaera	0	0	1.33668e-05	0	4.07542e-05	1.4213e-05	4.49607e-05	0	4.21484e-05	4.20687e-05	7.01292e-05	0.000111696	1.38311e-05	0	5.72697e-05	1.64198e-05	0	0.000311517	3.02092e-05	3.35869e-05	0	1.43497e-05	2.71854e-05	0	0	3.0087e-05	0	1.36351e-05	0	0.00143407	0.000804517	0.00133967	0.0017496	1.66931e-05	0	3.36632e-05	0	0.000212927	1.58464e-05	0.0075016	1.54109e-05	3.06847e-05	0	1.44333e-05	0.000173524	8.81329e-05	7.21178e-05	0.000101052	0
Mesotoga	0.000108583	5.42299e-05	0	0	0.000203771	4.26391e-05	0	0	0	0	0	0	0	0.000465641	0	0.00146136	0.00115275	5.93366e-05	0.000226569	0.00147782	0	5.73987e-05	1.35927e-05	4.09948e-05	1.35311e-05	0.000210609	1.44144e-05	1.36351e-05	0.000205009	1.36578e-05	2.87327e-05	3.11551e-05	0	0.00105167	0.000254879	5.04948e-05	7.43075e-05	0	0	0	9.24656e-05	4.60271e-05	0.000953179	4.33e-05	0	0	0	0	2.80552e-05
Methylobacterium_Methylorubrum	0.00162874	0.000176247	2.67337e-05	2.81555e-05	0.000597729	0.000497456	7.49344e-05	1.45866e-05	1.40495e-05	0	0	0	0	0.00189838	0	0.00270927	0.00292488	0.00017801	0.00205423	0.00280451	0.00020331	0.000602686	2.71854e-05	0.000204974	0.000108249	0.00212113	0.000691892	1.36351e-05	0.00231817	1.36578e-05	0.00165213	0.00227432	0.00235736	0.00285452	0.00291517	0.00166633	0.000832243	0	0.00120432	1.36145e-05	0.0019726	0.00200985	0.00294171	0.00132787	0.0026607	2.93776e-05	1.44236e-05	0	0.000280552
Methylophilus	0.00017063	8.13449e-05	0.000307437	0.000197089	0.000149432	9.94912e-05	1.49869e-05	0	5.61979e-05	1.40229e-05	2.80517e-05	0	0	8.95464e-05	0	0.000344816	0.000223667	0.000207678	0.000166151	8.39673e-05	8.1324e-05	2.86993e-05	6.79634e-05	0.000150314	8.11864e-05	6.01739e-05	5.76577e-05	9.54459e-05	7.88494e-05	2.73157e-05	5.74655e-05	0.00012462	0.000147335	0.000100159	0.000127439	1.68316e-05	0.000148615	3.99239e-05	0.000110924	8.16871e-05	0.000138698	0.000199451	0.000197209	4.33e-05	0.000134963	1.46888e-05	2.88471e-05	0	4.20828e-05
Microbacterium	0.0014426	0.000203362	9.35679e-05	0.000140778	0.0011547	0.00061116	0.000104908	0	2.8099e-05	4.20687e-05	0	0	1.38311e-05	0.000841736	0	0.00280779	0.00302811	0.000103839	0.00240163	0.00278771	0.000189756	0.00086098	4.0778e-05	0.000177644	8.11864e-05	0.00165478	0.000345946	1.36351e-05	0.00231817	2.73157e-05	0.00201129	0.00216528	0.00145493	0.00126868	0.00307447	0.00072376	0.00111461	2.66159e-05	0.000554622	0	0.00208048	0.00122739	0.00325396	0.00109693	0.00136891	0	4.32707e-05	0	0.000406801
Monoglobus	4.65354e-05	0.00492137	0.00132332	0.00104175	0.000163017	0.000397965	0.00278756	0.00358831	0.00196693	0.00344963	7.01292e-05	0.00295994	0.00218531	0.000232821	0.00137447	3.28396e-05	1.72052e-05	0.000652703	0.00302092	6.71738e-05	0.00584177	0.00190851	0.0116897	0.00446843	0.00250325	7.52174e-05	0.00144144	4.09054e-05	0.000205009	0.00184381	5.74655e-05	0.000171353	0.000368338	0.000383941	4.77897e-05	0.0012792	0.000579598	0.00312737	9.50781e-05	0.000544581	0.000138698	0.000721091	0	0.00619191	0.000674816	0.00208581	0.00387994	0.000461954	0.00100999
NK4A214_group	0.000791102	0.000366052	0.00025397	0.00439226	9.50932e-05	0.010006	0.00130386	0.00255266	0.00588673	0.000154252	0.000224413	0.0128171	0.00442594	0.000573097	0.00176104	9.85189e-05	6.88208e-05	0.00436124	1.51046e-05	0.000100761	0.00121986	0.00193721	0.000475744	0.00714676	0.00266562	0.000225652	0.00262342	9.54459e-05	9.46193e-05	0.0445792	5.74655e-05	0.000420594	0.00182327	0.000233703	0.000207089	0.00346731	0.00493401	5.32318e-05	0.000221849	0.000326748	4.62328e-05	0.000429586	3.28682e-05	0.000274234	0.000925462	0.00229146	0.001226	0.00109714	0.00035069
Negativibacillus	6.20472e-05	0	0.000387638	0.000422333	0	0.00127917	1.49869e-05	0	0.00532475	5.60915e-05	0	6.981e-05	0.000290452	1.79093e-05	0	0	0	0.000267015	0	1.67935e-05	2.7108e-05	0.00961428	2.71854e-05	0.000218639	1.35311e-05	0	0.000144144	0.00325879	0	0.000355104	5.74655e-05	0.000358283	0.00215478	5.00793e-05	0	0.000471285	0.000148615	0	3.16927e-05	1.36145e-05	4.62328e-05	0	0	8.66001e-05	1.92805e-05	0.000161577	0.000504825	1.44361e-05	0.0010661
Neisseria	4.65354e-05	0	1.33668e-05	2.81555e-05	0	2.8426e-05	0	0	0	0	1.40258e-05	0	0	0	1.43174e-05	6.56793e-05	0	1.48342e-05	0	0	0	0	0	0	0	0	0	0	0	0	0	0	3.68338e-05	0	3.18598e-05	0	0	1.3308e-05	0	0	0	3.06847e-05	3.28682e-05	1.44333e-05	0	0	0	0	0
Nitrospira	6.20472e-05	0	1.33668e-05	0	0	2.8426e-05	1.49869e-05	1.45866e-05	0	0	0	0	0	1.79093e-05	0	1.64198e-05	0	0	0	0	0	1.43497e-05	0	2.73299e-05	0	3.0087e-05	7.20721e-05	4.09054e-05	1.57699e-05	0	2.87327e-05	0	0.00125235	3.33862e-05	0	0.000858412	5.9446e-05	0	0.000602161	1.36145e-05	3.08219e-05	0.00026082	0	7.21667e-05	0.00156172	0	0	0	1.40276e-05
Novosphingobium	0.000263701	5.42299e-05	0.000200503	7.03888e-05	0.000163017	5.68521e-05	0	1.45866e-05	1.40495e-05	0	1.40258e-05	1.3962e-05	0	0.000376095	1.43174e-05	0.000541854	0.000584976	8.90049e-05	0.000286987	0.000587771	8.1324e-05	0.000114797	0.000122334	0.000177644	0.000108249	0.000165478	0.000158559	0.000177257	0.000457327	0.000150236	0.000215496	0.00018693	0.000497256	0.000534179	0.000302668	0.000504948	0.000148615	7.98478e-05	0.000285234	6.80726e-05	0.000184931	0.00026082	0.000690233	0.0001732	0.000482011	7.34441e-05	0	0	7.0138e-05
Odoribacter	0.00139606	0.00032538	0.000133668	0.00237914	1.35847e-05	0.000895421	0.000644436	2.91732e-05	0.00434129	2.80458e-05	9.81808e-05	0.000586404	0.0046749	1.79093e-05	0.00498246	1.64198e-05	1.72052e-05	0.000445025	0	1.67935e-05	0	0.00348697	0.00252824	0.00504236	0.00177257	1.50435e-05	0.000446847	0.000299973	1.57699e-05	0.000437051	2.87327e-05	0.000295973	0.00162069	1.66931e-05	7.96495e-05	0.00171682	0.000817382	0	0.000507083	0.0034717	7.70547e-05	0	0	4.33e-05	0.000539853	0.000572864	0.000764449	0.00177563	0.00116429
Olivibacter	0.000403307	2.7115e-05	1.33668e-05	0	8.15084e-05	4.26391e-05	0	0	0	0	0	0	0	0.000179093	0	0.000558274	0.000722618	4.45025e-05	0.000407824	0.000722119	5.4216e-05	0.000114797	1.35927e-05	2.73299e-05	1.35311e-05	0.000616783	0.000100901	0	0.000394247	0	0.000373526	0.000482904	0.000681425	0.000651031	0.000796495	0.000336632	0.000163476	0	0.000253542	0	0.000508561	0.000567668	0.00083814	0.0003464	0.000674816	0	0	0	0.000140276
Oscillibacter	0.000108583	8.13449e-05	2.67337e-05	0.0002534	0	1.4213e-05	0.000254777	0.000875197	0.00355452	0.000560915	4.20775e-05	2.7924e-05	0.00117564	0.000125365	0.000587014	0	0	4.45025e-05	0	0	2.7108e-05	0.000157846	0.00020389	0.00221372	0.00201613	0	0.00012973	0.00113172	3.15398e-05	0.000327788	1.43664e-05	0.000295973	1.84169e-05	1.66931e-05	1.59299e-05	6.73265e-05	0.000163476	1.3308e-05	0.000412005	0.00155206	0	0	0	7.21667e-05	0.000173524	0.00173328	0.000187506	0.000346465	0.000715408
Oscillospira	0	0	0	1.40778e-05	0	0	0	0	0	0	0	2.7924e-05	0	0	0	0	0	0	0	0	0	0	0	0	0	0	0	0	0	8.19471e-05	0	0	0	0	0	0	1.48615e-05	0	0	0	0	0	0	0	0	0	0	0	0
Oxalobacter	0	0	1.33668e-05	0.000661655	0	0.000895421	8.99213e-05	1.45866e-05	0.000505781	0.000434709	0	0.000181506	0.000304283	1.79093e-05	0	0	0	7.41708e-05	0	1.67935e-05	0	0.000186546	0	0.000327958	1.35311e-05	0	0.000201802	0	0	0.00117457	0	0	0	0	0	1.68316e-05	0.000252645	0	0.000538776	0	0	0	0	0	0	0	1.44236e-05	0	1.40276e-05
Paenibacillus	0.000139606	0	0	0	0.000122263	5.68521e-05	0	0	0	0	0	0	0	0.000197002	0	0.000328396	0.000172052	5.93366e-05	0.000256778	0.000201521	5.4216e-05	0.000100448	1.35927e-05	1.36649e-05	2.70621e-05	0.000165478	2.88288e-05	0	0.000236548	0	0.000244228	0.000249241	0.000460422	0.000133545	0.000270808	0.000319801	0.000118892	0	9.50781e-05	0	0.000184931	0.000168766	0.000213644	0.000202067	0.000520572	0	0	0	5.61104e-05
Pantoea	0.041975	0.00504338	0.00437096	0.000689811	0.00706407	0.0121948	0.00043462	0.000714744	0.000969414	0.000182298	0.00105194	0.00104715	0.0010235	0.0697745	0.00120266	0.0641851	0.0712295	0.00493977	0.0522619	0.0656624	0.00447282	0.0155981	0.000543707	0.00613556	0.00270621	0.0502151	0.0136649	0.000599945	0.055305	0.000423393	0.0242792	0.0517642	0.0506464	0.0664719	0.0662525	0.0307009	0.025324	0.000439163	0.0199823	0.000408436	0.0494229	0.0442627	0.0687932	0.0349287	0.051768	0.000381909	0.000230777	0.000317593	0.0044187
Parabacteroides	0.00434331	0.0079718	0.00255307	0.00525101	0.000475466	0.00994912	0.0121843	0.0204358	0.0135578	0.0106854	0.0302116	0.00294598	0.0122405	0.000967101	0.0204596	0.000476175	0.000189257	0.00753575	0.00827732	0.00048701	0.000108432	0.0227586	0.00618467	0.0197595	0.0577912	0.00030087	0.0252108	0.00350423	0.000520406	0.00290912	0.004784	0.00376976	0.00445689	0.0004841	0.0010673	0.00903858	0.015129	0.0919447	0.0199506	0.0660985	0.00426883	0.000567668	0.000443721	0.00343514	0.0140362	0.0102234	0.0180727	0.0382555	0.0093985
Paracoccus	0.000372283	4.06725e-05	8.0201e-05	5.63111e-05	0.000176602	0.000184769	0	1.45866e-05	1.40495e-05	2.80458e-05	5.61033e-05	0	0	0.000447732	2.86348e-05	0.000656793	0.000671002	4.45025e-05	0.000498452	0.000570978	1.3554e-05	0.000200895	1.35927e-05	5.46597e-05	2.70621e-05	0.000376087	1.44144e-05	1.36351e-05	0.000346937	0	0.000172396	0.000420594	0.000515673	0.000634338	0.000509757	0.000134653	0.000178338	0	4.75391e-05	1.36145e-05	0.000539383	0.000214793	0.000673799	0.0003031	0.000269926	1.46888e-05	0	1.44361e-05	2.80552e-05
Paraprevotella	0.00195449	0.000338937	0.00080201	0.000746122	2.71695e-05	0.00133602	0.00488572	0.0198524	0.0153561	1.40229e-05	0.0244751	0.0484062	6.91553e-05	5.37278e-05	0.00544062	6.56793e-05	0	0.00139441	6.04184e-05	0.000134348	1.3554e-05	0.00605556	1.35927e-05	0	1.35311e-05	3.0087e-05	0.000518919	0.0132397	6.30795e-05	0.00893223	2.87327e-05	0.00372303	0.0011971	5.00793e-05	0.000430108	0.0042584	0.00716324	3.99239e-05	0.00408836	4.08436e-05	0.00218835	0.00296108	1.64341e-05	5.77334e-05	0	8.81329e-05	0.000144236	0.000101052	1.40276e-05
Parasutterella	0.00051189	0.00178959	0.0197161	0.0001267	0.000407542	0.000127917	0.0009142	0.0014149	0.0170139	0.0108257	0.0436484	0.00201053	0.00203317	7.16371e-05	0.000658601	4.92595e-05	3.44104e-05	0.000192844	3.02092e-05	0.000151141	4.0662e-05	0.00114797	0.0110916	0.000888221	0.0227998	0.000902609	0.000115315	0.0245978	0.0014666	0.000150236	0.000229862	0.00227432	0.000847177	0.000200317	9.55795e-05	0.00176732	0.00010403	0	0.00172725	0.00464255	7.70547e-05	0.000552325	8.21706e-05	0.000822701	0.00244862	0.00832856	0.00175967	0.0132379	0.000575132
Paucilactobacillus	0.00165976	0.000298265	6.68342e-05	2.81555e-05	0.00120904	0.000511669	4.49607e-05	2.91732e-05	0	1.40229e-05	0	2.7924e-05	0	0.00211329	5.72697e-05	0.00261075	0.00304532	0.000385688	0.00219017	0.00280451	0.00027108	0.00103318	4.0778e-05	0.000368953	0.000135311	0.00185035	0.000792793	2.72702e-05	0.00227086	0	0.00248538	0.00224317	0.00384913	0.00206994	0.00223019	0.00215445	0.00124837	3.99239e-05	0.00185402	1.36145e-05	0.00238869	0.00190245	0.00254729	0.0015588	0.00341264	2.93776e-05	1.44236e-05	1.44361e-05	0.000659297
Pediococcus	0.0114632	0.00204718	0.000320804	0.000267478	0.00805575	0.00449132	7.49344e-05	7.29331e-05	0.000126445	4.20687e-05	9.81808e-05	8.3772e-05	0	0.0155811	7.15871e-05	0.0174379	0.0165342	0.00167626	0.014002	0.0166591	0.00140962	0.00629951	0.000176705	0.00209074	0.00110955	0.0140807	0.00219099	0.000122716	0.0145398	6.82892e-05	0.0130447	0.0132253	0.00622491	0.0157917	0.0157069	0.00407325	0.00885745	0.000146388	0.00318512	0.000108916	0.0120359	0.00664324	0.0178803	0.00838577	0.00616975	4.40665e-05	2.88471e-05	2.88721e-05	0.00425036
Pedobacter	0.00034126	4.06725e-05	1.33668e-05	0	0.000203771	8.52781e-05	0	0	0	0	0	0	0	0.000125365	0	0.000574694	0.000516156	1.48342e-05	0.000438033	0.000520597	2.7108e-05	0.000100448	0	6.83247e-05	0	0.000451304	7.20721e-05	0	0.000599256	0	0.000186763	0.000529636	0.000110501	0.000367248	0.000700916	0	0.000118892	0	1.58464e-05	0	0.000570205	0.000107397	0.00055876	0.000288667	0.000115683	0	0	0	4.20828e-05
Petrimonas	3.10236e-05	0	0.000200503	5.63111e-05	0.000122263	1.4213e-05	1.49869e-05	0	1.40495e-05	0	0	0	1.38311e-05	0.000143274	2.86348e-05	0.000706052	0.000653797	0	3.02092e-05	0.000621358	5.4216e-05	2.86993e-05	0	5.46597e-05	0	1.50435e-05	0	0	4.73097e-05	0	5.74655e-05	3.11551e-05	0	0.000617645	4.77897e-05	1.68316e-05	5.9446e-05	0	0	0	3.08219e-05	0	0.000460155	7.21667e-05	7.71218e-05	0	0	0	1.40276e-05
Phascolarctobacterium	0.000961732	0.00027115	0.0138347	0.000267478	0.00025811	0.000198982	0.00221806	0.000160453	0.000182643	0.0222824	0.0905788	0.0163076	0.00026279	0.000125365	0.00498246	6.56793e-05	0.000154847	0.000756542	4.53138e-05	0.000218315	4.0662e-05	0.00179371	0.000475744	0.020716	0.000514181	0.0032193	0.00105225	0.0122716	0.000646565	0.000122921	0.000129297	0.00423709	0.00169435	0.000400634	0.0010673	0.00621087	0.000386399	5.32318e-05	0.0160365	0.000599039	6.16437e-05	0.000767118	0.000147907	0.00262687	0.00942814	0.0128527	0.0154188	0.00531247	0.0135086
Porphyromonas	7.75591e-05	0	0	0	0	0	0	0	5.61979e-05	0	0	0	4.14932e-05	0	0	0	0	1.48342e-05	0	0	1.3554e-05	0	0	0	0.00012178	0	0.000259459	0	0	0	0	0	5.52507e-05	0	9.55795e-05	1.68316e-05	0	0	3.16927e-05	0.00614015	0	3.06847e-05	0	0	9.64023e-05	1.46888e-05	0.00040386	4.33082e-05	0
Prevotella	0.00017063	2.7115e-05	4.01005e-05	0	4.07542e-05	0	1.49869e-05	2.91732e-05	0	1.40229e-05	2.80517e-05	5.5848e-05	2.76621e-05	1.79093e-05	0.00134584	0	0.000103231	0.00670504	1.51046e-05	0	0	0	8.15561e-05	1.36649e-05	0.000230028	0.000105304	0.00110991	9.54459e-05	6.30795e-05	0.000723866	0	0	3.68338e-05	0	0	0.00129603	0.00141184	3.99239e-05	0	0.0677322	0	0	0	0.000447434	0.000115683	0	0.00662042	0	0
Prevotella_7	0	0	0	1.40778e-05	0	0	0	0	4.21484e-05	2.80458e-05	0	0	0	0	0	0	0	0	0	0	1.3554e-05	0	0.00757112	1.36649e-05	2.70621e-05	3.0087e-05	0	9.54459e-05	7.88494e-05	0	0	0	0	0	0	0	4.45845e-05	0	0.000396159	0	0	0	0	0	0	0	0	2.88721e-05	0
Prevotella_9	0.0949633	0.00178959	0.00159065	0.228018	0.00245884	0.205819	0.000149869	0.000437598	0.000351237	0.000911488	0.000715318	0.000572442	0.00065006	0.00822036	0.0772281	0.000147778	0.000206462	0.160565	0.000181255	0.000419836	9.48779e-05	0.000100448	0.000598078	0.000286964	0.000338277	0.106192	0.00730811	0.0136351	0.000299628	0.00572264	0.000215496	0.0250643	0.0339976	0.0152909	0.000493827	0.00235643	0.00851563	0.000212927	0.000206003	0.000517352	0.0554948	0.140643	0.000361551	0.000995901	0.0122045	0.000293776	0.000346165	0.000216541	5.61104e-05
Prevotellaceae_Ga6A1_group	0	0.000135575	2.67337e-05	0	0	0	0	0	0	0	0	0	0	0	0	1.64198e-05	0	0	3.02092e-05	0	1.3554e-05	0	0	0	0	0	0	0	1.57699e-05	0	0	0	0	3.33862e-05	3.18598e-05	0	0	0	0	0	0.010649	3.06847e-05	1.64341e-05	1.44333e-05	1.92805e-05	0	0	0	0
Prevotellaceae_NK3B31_group	0	0	0	0	1.35847e-05	0	0	0	1.40495e-05	0	0	0	0	0	1.43174e-05	0	0	0	0	0	0	0	0	0	0	0	0	0	0	0.00415198	0	3.11551e-05	0.00721942	0	0.000573477	3.36632e-05	0	0	1.58464e-05	0	0	0	0	0	0	1.46888e-05	0	0	0
Propionibacterium	0.000232677	0	1.33668e-05	0	4.07542e-05	2.8426e-05	1.49869e-05	0	0	0	0	0	0	7.16371e-05	0	0.000229878	0.000258078	1.48342e-05	0.000241674	0.000352663	5.4216e-05	1.43497e-05	0	0	0	0.000285826	0	0	0.000236548	0	0.00015803	0.00018693	3.68338e-05	0.000116852	0.000366388	3.36632e-05	4.45845e-05	0	1.58464e-05	0	0.000154109	4.60271e-05	0.000361551	8.66001e-05	0	0	0	0	1.40276e-05
Proteiniphilum	4.65354e-05	0	1.33668e-05	0	0.000475466	4.26391e-05	0	0	0	0	0	0	0	0.000805917	0	0.00233161	0.00246034	5.93366e-05	7.5523e-05	0.00219994	2.7108e-05	5.73987e-05	1.35927e-05	0.000109319	1.35311e-05	0.000135391	0	0	0.000110389	1.36578e-05	0.00015803	0.000171353	3.68338e-05	0.00181955	4.77897e-05	1.68316e-05	5.9446e-05	0	1.58464e-05	0	0.000154109	1.53424e-05	0.00195566	0.000115467	7.71218e-05	0	0	0	1.40276e-05
Proteus	4.65354e-05	1.35575e-05	4.01005e-05	1.40778e-05	0	2.8426e-05	1.49869e-05	2.91732e-05	2.8099e-05	2.80458e-05	5.61033e-05	1.3962e-05	0	0	2.86348e-05	6.56793e-05	5.16156e-05	4.45025e-05	1.51046e-05	3.35869e-05	0	1.43497e-05	1.35927e-05	0	1.35311e-05	7.52174e-05	1.44144e-05	1.36351e-05	0	0	1.43664e-05	4.67326e-05	0	6.67724e-05	3.18598e-05	0	0	1.3308e-05	0	0	3.08219e-05	3.06847e-05	1.64341e-05	1.44333e-05	7.71218e-05	2.93776e-05	0	1.44361e-05	0
Pseudomonas	0.0111685	0.00122017	0.000454473	0.000239322	0.0036543	0.00369539	0.000104908	0.000204213	8.42969e-05	5.60915e-05	9.81808e-05	0	5.53243e-05	0.0134857	0.000128857	0.0185216	0.0173084	0.00148342	0.013866	0.0176835	0.00147739	0.0042188	0.000108741	0.00177644	0.00075774	0.013825	0.00373333	8.18107e-05	0.014871	0.000150236	0.00936687	0.0142379	0.0163358	0.0191303	0.0185902	0.0105871	0.00628641	0.000173003	0.00716255	0.000108916	0.0130376	0.0127035	0.0173873	0.00857341	0.0169861	0.000146888	2.88471e-05	2.88721e-05	0.00175345
Psychrobacter	0.000124094	0	2.67337e-05	0	0	4.26391e-05	0	0	4.21484e-05	0	7.01292e-05	1.3962e-05	0	3.58185e-05	1.43174e-05	0.000246297	0.000275283	0	0.000256778	0.000134348	6.777e-05	2.86993e-05	1.35927e-05	1.36649e-05	6.76553e-05	0.000225652	0	0	0.000220778	0	0.00015803	0.000140198	0.000128918	0.00026709	0.000223019	0	0.000133753	0	0	1.36145e-05	0.000184931	0.000168766	0.000197209	7.21667e-05	1.92805e-05	4.40665e-05	0	1.44361e-05	2.80552e-05
Rahnella1	0.000449843	4.06725e-05	4.01005e-05	0	8.15084e-05	0.00014213	2.99738e-05	1.45866e-05	0	0	0	0	0	0.000823826	0	0.000853831	0.00092908	7.41708e-05	0.000709916	0.000772499	4.0662e-05	0.000114797	2.71854e-05	9.56546e-05	0.00012178	0.000631826	0.000216216	0	0.000583486	0	0.000330427	0.000638679	0.000755092	0.000817962	0.000892075	0.000673265	0.000282368	0	0.000380312	0	0.000523972	0.000690406	0.000640931	0.000433	0.000983303	1.46888e-05	0	0	7.0138e-05
Rhodococcus	0.00575488	0.000664317	0.000106935	0.0001267	0.00270336	0.00173399	5.99475e-05	5.83465e-05	0	1.40229e-05	1.40258e-05	2.7924e-05	1.38311e-05	0.00933073	4.29523e-05	0.0121999	0.012663	0.000904883	0.00839816	0.0122592	0.00047439	0.00301343	9.51488e-05	0.000792566	0.000405932	0.00837922	0.00147027	2.72702e-05	0.00969848	8.19471e-05	0.00613444	0.00867669	0.00550665	0.0112011	0.0116766	0.00233959	0.00399774	6.65398e-05	0.00213926	6.80726e-05	0.0077517	0.00523175	0.0120462	0.00430114	0.00572629	2.93776e-05	2.88471e-05	4.33082e-05	0.00171137
Rikenellaceae_RC9_gut_group	0	4.06725e-05	4.01005e-05	0	0	0	0	0	0	0	0	0	0	0	0	0	0	4.45025e-05	0	0	0	0	0.000108741	9.56546e-05	6.76553e-05	1.50435e-05	0	0	0	0.00729329	1.43664e-05	0	0	1.66931e-05	0	0	0	1.3308e-05	0	0	3.08219e-05	0	0	0	0	0	0	0	0
Romboutsia	0.000589449	0.00416215	0.0134203	0.000154855	0.00209205	0.00373803	0.000134882	0.00129821	7.02474e-05	0.000140229	8.4155e-05	0.00020943	0.000138311	0.000555187	0.00201876	0.000311977	0.000344104	0.00124607	0.000407824	0.000319076	0.00246683	0.000143497	0.00666041	5.46597e-05	0.00063596	0.000330956	0.000201802	4.09054e-05	0.00100927	0.00120189	0.000387892	0.000810032	0.000902427	0.00131875	0.000254879	0.000605938	0.000936274	2.66159e-05	0.000491237	4.08436e-05	0.000847601	0.00243944	0.000509458	0.0029444	0.00100258	0.00171859	0.00131254	0.00383999	0.000575132
Roseburia	0.0119131	0.00603308	0.0116024	0.019554	0.000190186	0.010205	0.0233346	0.00647646	0.000688425	0.0249327	0.000322594	0.0338858	0.00344394	0.00121783	0.00747369	0.000229878	0.000258078	0.0278882	0.00779397	0.000151141	0.0367584	0.0225433	0.0136063	0.0063132	0.0189164	0.000361043	0.0425514	0.0965503	0.00157699	0.00404272	0.000201129	0.0115897	0.00333346	0.000684417	0.000828355	0.00828116	0.00233325	0.00286121	0.0105537	0.00186519	0.000893834	0.00234738	8.21706e-05	0.00295884	0.00217869	0.0682589	0.00934647	0.0745334	0.00443272
Rothia	0.000217165	0.000244035	0.000521307	0.000239322	4.07542e-05	0.000127917	0.000104908	2.91732e-05	0.000590078	0	4.20775e-05	6.981e-05	0.000456425	0	0.000959267	1.64198e-05	3.44104e-05	0.000118673	0.000105732	1.67935e-05	0.000216864	0	0.00122334	5.46597e-05	5.41243e-05	0	0.000446847	0.000449959	1.57699e-05	0.00118823	0.000114931	0.00012462	0.00114185	0	1.59299e-05	0.000201979	5.9446e-05	0.000372623	0.000253542	5.44581e-05	0.00342123	7.67118e-05	0	0.0003897	0.000173524	0	0.000346165	5.77442e-05	0
Ruminococcus	0.00342811	0.0395743	0.00447789	0.0371653	0.000271695	0.0109156	0.0436418	0.0556625	0.000449583	0.00114988	0.000210388	0.0216551	0.00423231	0.00535487	0.0119694	0.000131359	6.88208e-05	0.00646769	0.00119326	0.000201521	0.0403909	0.00107623	0.0643478	0.0143345	0.0369398	0.00255739	0.00681802	0.000163621	9.46193e-05	0.0229179	0.000258595	0.00327128	0.00182327	0.00091812	0.000238949	0.0113277	0.00212519	0.000199619	0.00288404	0.00147037	0.000508561	0.00443394	3.28682e-05	0.0154725	0.00123395	0.0614874	0.0601607	0.00479277	0.00760296
SN8	0.000124094	4.06725e-05	0	0	8.15084e-05	2.8426e-05	0	0	0	0	0	0	0	0.000268639	0	0.000229878	0.000292488	1.48342e-05	0.000181255	0.000470217	1.3554e-05	7.17484e-05	0	4.09948e-05	0	0.000210609	0	0	0.000173469	0	7.18319e-05	9.34652e-05	0	0.000333862	0.000238949	0	7.43075e-05	0	1.58464e-05	0	0.000261986	3.06847e-05	0.000246512	0	0	0	0	0	5.61104e-05
Saccharopolyspora	0.000915197	0.000149132	4.01005e-05	1.40778e-05	0.000652068	0.000241621	1.49869e-05	0	2.8099e-05	2.80458e-05	4.20775e-05	1.3962e-05	0	0.00223866	2.86348e-05	0.00233161	0.00170331	8.90049e-05	0.0016464	0.00203201	0.000149094	0.000746183	0	0.000259634	5.41243e-05	0.00188043	0.000576577	2.72702e-05	0.00164007	0	0.00123551	0.00163564	0.00208111	0.00173608	0.00208682	0.00131287	0.000891689	2.66159e-05	0.000934935	2.7229e-05	0.00127911	0.00153424	0.00228434	0.000894868	0.00217869	0	0	1.44361e-05	0.000238469
Saccharopolyspora_rectivirgula	0.000186142	0	0	0	0	2.8426e-05	0	1.45866e-05	0	0	0	0	0	0.000232821	0	0.000229878	0.000137642	1.48342e-05	0.000120837	0.000218315	0	2.86993e-05	1.35927e-05	0	0	0.000180522	2.88288e-05	0	0.000173469	0	0.00015803	0.000218086	0.000128918	0.000233703	0.000270808	6.73265e-05	5.9446e-05	0	6.33854e-05	0	4.62328e-05	9.20542e-05	0.000361551	0.0001299	0.000173524	0	0	0	0
Schleiferilactobacillus	0.000387795	9.49024e-05	1.33668e-05	1.40778e-05	0.00025811	0.000312687	1.49869e-05	0	0	0	0	1.3962e-05	0	0.000411913	1.43174e-05	0.000492595	0.000447335	0.000133507	0.000468243	0.00048701	2.7108e-05	0.000200895	0	4.09948e-05	4.05932e-05	0.00039113	7.20721e-05	0	0.000551946	0	0.000344793	0.000451749	0.000478839	0.000400634	0.000573477	0.000269306	0.000326953	0	0.000427852	0	0.00032363	0.00032219	0.00055876	0.0002598	0.000501292	0	0	1.44361e-05	7.0138e-05
Secundilactobacillus	0.000744567	0.000135575	1.33668e-05	0	0.000489051	0.000369539	0	0	0	0	0	0	0	0.00114619	1.43174e-05	0.00134643	0.00111834	0.000252181	0.00101201	0.00117554	0.00013554	0.00045919	0	0.000163979	6.76553e-05	0.000962782	0.000504505	2.72702e-05	0.000961963	4.09735e-05	0.00099128	0.000825609	0.0016391	0.000884734	0.00101951	0.000841581	0.00059446	0	0.000792318	4.08436e-05	0.000816779	0.00122739	0.000953179	0.000591767	0.00127251	0	0	0	0.000406801
Senegalimassilia	0	0	1.33668e-05	0	0	0.000866995	0	0.000598051	0	0	0	1.3962e-05	0	0	0.00227647	0	0	0.000474693	0	0	0	0	1.35927e-05	0	0	0	0.000187387	0	0	0.00248573	0	0	0	0.000150238	0	0	0.00331411	0	1.58464e-05	0	6.16437e-05	0	0	0	1.92805e-05	8.81329e-05	0.0014712	0	0
Serratia	0.00504134	0.000610087	0.000160402	7.03888e-05	0.000883008	0.00149237	5.99475e-05	8.75197e-05	7.02474e-05	2.80458e-05	2.80517e-05	2.7924e-05	2.76621e-05	0.00814872	1.43174e-05	0.00735608	0.00834452	0.0006082	0.0055736	0.00908526	0.000908117	0.0023964	6.79634e-05	0.000806231	0.000297683	0.00573156	0.00145586	1.36351e-05	0.00679682	6.82892e-05	0.00339046	0.0064491	0.00469631	0.00839663	0.00833134	0.00339999	0.00306147	3.99239e-05	0.00193326	6.80726e-05	0.00616437	0.00432655	0.00882512	0.00414237	0.00505148	5.87553e-05	2.88471e-05	5.77442e-05	0.000617215
Solobacterium	1.55118e-05	5.42299e-05	6.68342e-05	1.40778e-05	9.50932e-05	0.000227408	2.99738e-05	2.91732e-05	0.000126445	0	0	6.981e-05	2.76621e-05	0	1.43174e-05	1.64198e-05	0	1.48342e-05	0	0	0.000162648	7.17484e-05	2.71854e-05	1.36649e-05	4.05932e-05	0	4.32432e-05	0.000163621	0	6.82892e-05	1.43664e-05	0	9.20844e-05	1.66931e-05	0	0	7.43075e-05	2.66159e-05	3.16927e-05	0	0	4.60271e-05	0	0.000101033	0	2.93776e-05	4.32707e-05	4.33082e-05	0
Sphingobacterium	0.00248189	0.000244035	4.01005e-05	0	0.000937347	0.000483243	4.49607e-05	4.37598e-05	1.40495e-05	1.40229e-05	1.40258e-05	0	0	0.00180884	1.43174e-05	0.00540212	0.00509274	0.000252181	0.00333812	0.00581054	0.000257526	0.000918379	2.71854e-05	0.000273299	0.00012178	0.00368565	0.000576577	2.72702e-05	0.00433672	5.46314e-05	0.00244228	0.00331802	0.00138127	0.00527502	0.00532059	0.000942571	0.00136726	1.3308e-05	0.000459544	1.36145e-05	0.00322088	0.00156492	0.00562047	0.00200624	0.00121467	0	4.32707e-05	2.88721e-05	0.000603187
Sphingomonas	0.0013185	0.000203362	0.000267337	9.85444e-05	0.000692822	0.000341113	4.49607e-05	4.37598e-05	7.02474e-05	7.01144e-05	5.61033e-05	1.3962e-05	5.53243e-05	0.0025073	0.000114539	0.00261075	0.00278724	0.000311517	0.0016464	0.00297244	0.000216864	0.000416141	0.000163112	0.000273299	0.000148842	0.00180522	0.000518919	0.000327243	0.00206586	0.000122921	0.00126424	0.00160449	0.00230211	0.00278775	0.00230984	0.00134653	0.000861966	2.66159e-05	0.00104586	0.000108916	0.00189554	0.00148821	0.00281024	0.000952601	0.00219797	0.000102822	0.000100965	5.77442e-05	0.000308607
Spirosoma	0.000248189	0	0	0	6.79237e-05	0.000170556	1.49869e-05	0	0	0	0	0	1.38311e-05	0.000214911	1.43174e-05	0.000426915	0.000378514	1.48342e-05	0.000226569	0.00038625	2.7108e-05	2.86993e-05	0	4.09948e-05	0	0.000376087	0.00012973	1.36351e-05	0.000283858	0	0.000244228	0.000451749	0.000368338	0.000367248	0.000589407	0.000117821	8.91689e-05	0	4.75391e-05	0	9.24656e-05	0.000291505	0.000295814	0.000144333	0.000385609	0	0	0	2.80552e-05
Staphylococcus	0.0504444	0.00704989	0.00122975	0.000830588	0.0316932	0.0183206	0.000719371	0.000466772	0.000337188	0.000210343	0.000154284	0.000195468	0.000373439	0.0557874	0.000357935	0.0839217	0.0812945	0.00652703	0.0706744	0.0827078	0.00547581	0.0265182	0.000584485	0.00858158	0.00443819	0.0718777	0.00945586	0.000709026	0.0737715	0.000450709	0.0599221	0.0683387	0.0206453	0.0725148	0.082055	0.0137683	0.0333343	0.000665398	0.0101734	0.000599039	0.0599177	0.0269872	0.0843892	0.0416546	0.0208229	0.000514109	0.000216353	0.000216541	0.0163281
Stenotrophomonas	0.000465354	4.06725e-05	4.01005e-05	1.40778e-05	0.000163017	0.000227408	0	1.45866e-05	5.61979e-05	4.20687e-05	2.80517e-05	0	0	0.000626825	1.43174e-05	0.000968769	0.00125598	7.41708e-05	0.000543766	0.000974021	8.1324e-05	0.000215245	0	0.000136649	0	0.000541565	8.64865e-05	0	0.000914653	1.36578e-05	0.000517189	0.000778877	0.000626174	0.000817962	0.000764636	0.000286137	0.000267507	2.66159e-05	0.000301081	0	0.000739725	0.000414244	0.00115039	0.000274234	0.000636255	0	0	1.44361e-05	0.000112221
Streptococcus	0.0345758	0.00573482	0.00537347	0.000957288	0.0162609	0.0108588	0.000809292	0.00306319	0.0215941	0.000280458	0.00357659	0.00174525	0.0026279	0.026058	0.00853318	0.0373223	0.0330512	0.00783243	0.0271883	0.0331503	0.0119275	0.0102026	0.00391469	0.00634053	0.00460056	0.0296958	0.00723604	0.0025634	0.0293162	0.0155563	0.024078	0.026513	0.0324874	0.0306485	0.0337077	0.0141554	0.015129	0.00948858	0.0101892	0.0492846	0.0443218	0.0183648	0.0331969	0.0154725	0.0185092	0.00101353	0.00142793	0.00269954	0.00681742
Streptomyces	0.000791102	0.00010846	5.34674e-05	1.40778e-05	0.000448296	0.00028426	1.49869e-05	1.45866e-05	2.8099e-05	2.80458e-05	1.40258e-05	0	0	0.00182675	2.86348e-05	0.00200322	0.00182375	7.41708e-05	0.00148025	0.00189766	9.48779e-05	0.000358742	0	0.000136649	6.76553e-05	0.00139904	0.000172973	0	0.000851574	1.36578e-05	0.000933814	0.00107485	0.00139968	0.00181955	0.0015452	0.00109406	0.000639044	0	0.000808164	4.08436e-05	0.00121746	0.00084383	0.00180775	0.000822701	0.00171596	0	0	0	0.000196386
Subdoligranulum	0.00756976	0.0242815	0.0166818	0.00678548	0.00110036	0.0549618	0.0337505	0.0155785	0.0237998	0.0227451	0.0191172	0.0212083	0.0778551	0.00866809	0.1614	0.000607533	0.000137642	0.0265828	0.022234	0.000822879	0.0207105	0.035702	0.0709402	0.0238043	0.031162	0.013133	0.0416432	0.0263022	0.0149656	0.014969	0.00304567	0.00565465	0.00924528	0.00859695	0.00304261	0.0157039	0.0252348	0.000479087	0.0138497	0.00445195	0.00383732	0.0176744	0.000230078	0.106085	0.0101801	0.0174356	0.0376888	0.00747788	0.0723965
Sutterella	0.000108583	0.000176247	5.34674e-05	0	0	0.00287103	0.000269764	0.00300484	2.8099e-05	2.80458e-05	7.01292e-05	0.000167544	8.29864e-05	1.79093e-05	4.29523e-05	0	0	0.000845547	0.000694812	5.03804e-05	0.00112498	4.3049e-05	0.00100586	1.36649e-05	2.70621e-05	0	2.88288e-05	1.36351e-05	0	0.000245841	0.000114931	0.000202508	0.000110501	0	0	3.36632e-05	8.91689e-05	0	1.58464e-05	0.000680726	1.54109e-05	1.53424e-05	0	1.44333e-05	5.78414e-05	0.00790258	5.76942e-05	5.77442e-05	0.000154304
TM7x	0	0.000135575	0.000160402	7.03888e-05	0.000393958	5.68521e-05	0	0.000102106	2.8099e-05	2.80458e-05	0.000392723	4.1886e-05	1.38311e-05	0	0.000100222	0	0	0.000103839	0	0	0.000718362	5.73987e-05	1.35927e-05	8.19896e-05	0.000108249	1.50435e-05	5.76577e-05	0.000422689	1.57699e-05	9.56049e-05	0.00015803	7.78877e-05	0.000110501	6.67724e-05	0	1.68316e-05	5.9446e-05	0.000412547	0	2.7229e-05	3.08219e-05	6.13695e-05	0	0.000404134	0.000115683	2.93776e-05	0.000187506	4.33082e-05	1.40276e-05
Thermoactinomyces	0.00034126	1.35575e-05	0	0	0.000217356	7.10651e-05	0	0	0	0	0	0	0	0.000358185	0	0.000689633	0.00049895	5.93366e-05	0.000347406	0.000604564	4.0662e-05	0.000186546	0	4.09948e-05	1.35311e-05	0.000406174	1.44144e-05	0	0.000536176	2.73157e-05	0.000488457	0.000529636	0.000368338	0.000584258	0.000461967	0.000117821	0.000252645	0	0.000126771	0	0.000416095	0.000245478	0.000640931	0.000245367	0.000231365	1.46888e-05	0	1.44361e-05	5.61104e-05
Turicibacter	9.30709e-05	6.77874e-05	0.000494573	0	5.4339e-05	0.00234515	1.49869e-05	0.000218799	0.000168594	1.40229e-05	8.4155e-05	0.000153582	5.53243e-05	7.16371e-05	0.00094495	4.92595e-05	1.72052e-05	4.45025e-05	3.02092e-05	3.35869e-05	1.3554e-05	0	0.000231076	0.000191309	0.000202966	0.000135391	7.20721e-05	0	3.15398e-05	0	2.87327e-05	0.000623101	0.000276253	3.33862e-05	1.59299e-05	0.00010099	0.000193199	0	0.000221849	1.36145e-05	0.000107877	0.000107397	4.93024e-05	0.0018186	0.000597694	0.000146888	0.000663484	0.00463397	9.81932e-05
Tychonema_CCAP_1459_11B	0	0	0	0	0.000122263	0	0	0	1.40495e-05	0	0	1.3962e-05	1.38311e-05	0.000447732	2.86348e-05	0.000837411	0.000774234	1.48342e-05	0.000105732	0.000604564	4.0662e-05	4.3049e-05	0	4.09948e-05	2.70621e-05	4.51304e-05	4.32432e-05	1.36351e-05	6.30795e-05	0	0.000114931	6.23101e-05	0.000313087	0.000734496	3.18598e-05	0.00010099	0	0	9.50781e-05	0	0.000107877	0.000429586	0.000772404	0	0.000501292	0	0	0	2.80552e-05
Tyzzerella	9.30709e-05	0.000637202	0.000200503	0.000323789	0.000244525	2.8426e-05	1.49869e-05	0.00226093	0.00324543	8.41373e-05	4.20775e-05	0.00034905	0.00167356	0	0.000873362	3.28396e-05	6.88208e-05	5.93366e-05	0.00102711	3.35869e-05	0.00703452	0.000401791	0.00040778	0.00800765	0.000974237	0.000496435	4.32432e-05	0.00944914	0.000441557	0	5.74655e-05	4.67326e-05	0.000147335	0.000517486	1.59299e-05	0.00153168	0.000237784	1.3308e-05	0.00481729	0.0220555	0.00129452	0.00133479	4.93024e-05	0.00109693	9.64023e-05	0.000352532	0.00116831	4.33082e-05	0.00186567
UBA1819	0	0	8.0201e-05	0.000140778	0	8.52781e-05	5.99475e-05	0	0.000674375	0.000224366	0.000378698	6.981e-05	0.000608567	0.000107456	0.00100222	1.64198e-05	0	0.000103839	0	0	5.4216e-05	0.000172196	0.000367002	0.000204974	0.00151548	1.50435e-05	0.000216216	0.000395419	9.46193e-05	2.73157e-05	1.43664e-05	7.78877e-05	9.20844e-05	1.66931e-05	0.000270808	0.000168316	0.000475568	0	4.75391e-05	0.00185157	0	0	1.64341e-05	2.88667e-05	0.000154244	0.000778507	0.000230777	0.000375337	0.000406801
UCG_002	0.00479315	0.00130152	0.000668342	0.0154715	0.000312449	0.0170698	0.00599475	0.00981679	0.0103264	0.0168695	0.000224413	0.00819569	0.0235681	0.00205957	0.0376978	6.56793e-05	0.000206462	0.0173263	9.06276e-05	0.000235108	9.48779e-05	0.034511	0.00807405	0.0197868	0.00346395	0.000421217	0.0141261	0.00563131	0.000141929	0.0797755	0.000344793	0.000716567	0.00574607	0.000166931	0.00173636	0.00653067	0.0341963	0.000119772	0.00242449	0.022886	0.000863012	0.000398901	1.64341e-05	0.00152993	0.000944742	0.008402	0.01076	0.00355127	0.00342274
UCG_003	0.00051189	0.000338937	0.000120302	0.00108399	2.71695e-05	0.00157765	0.000419633	0.000656398	0.00199503	0.00103769	2.80517e-05	0.00221996	0.00157674	5.37278e-05	0.00297802	3.28396e-05	3.44104e-05	0.00292233	3.02092e-05	0	5.4216e-05	0.000832281	0.000135927	0.000901886	0.000338277	1.50435e-05	0.000302703	0.000313608	0	0.00239012	1.43664e-05	0.000202508	0.000165752	0	0	0.000555443	0.00203602	0	0.000412005	0.00130699	0.000123287	1.53424e-05	1.64341e-05	8.66001e-05	0.000520572	0.000881329	0.00129812	0.000332029	0.000322635
UCG_005	0.0151395	0.00218275	0.000989146	0.00526508	0.000190186	0.0135592	0.0184489	0.00778925	9.83464e-05	0.00138827	0.000182336	0.00543122	0.00590587	0.00127156	0.0264586	0.000131359	8.60259e-05	0.033184	7.5523e-05	0.000268695	0.000853902	0.00279819	0.00981392	0.00547964	0.00173198	0.000541565	0.0319279	0.000109081	0.000220778	0.0157748	7.18319e-05	0.000919075	0.00366496	0.000300476	0.000684986	0.00528513	0.018666	6.65398e-05	0.00114094	0.000898558	0.00483903	0.000245478	4.93024e-05	0.00330524	0.00044345	0.00746192	0.00940416	0.00243969	0.00367523
Veillonella	0.00138055	0.00193872	0.000641608	0.000323789	0.00025811	0.00210353	0.000509554	0.00106482	0.0148784	0.000154252	0.000434801	0.000726024	5.53243e-05	0.000429823	0.00137447	4.92595e-05	1.72052e-05	0.00726874	0.000725021	5.03804e-05	0.00417463	0.000817931	0.00383314	0.000232304	0.000811864	0.00030087	2.88288e-05	0.000327243	0.000567716	0.00689721	0.0144095	0.000109043	0.000791926	0.000133545	0	0.000286137	0.000549875	0.208616	0.000633854	0.00014976	0.000431506	0.000659722	0	2.88667e-05	0.000269926	5.87553e-05	0.0015289	0.00948449	0.000252497
Weissella	0.0134487	0.0020743	0.00167085	0.000450488	0.00809651	0.00508826	0.000254777	0.000291732	0.00217767	0.000140229	0.000266491	8.3772e-05	0.000235128	0.0152229	0.000214761	0.0228564	0.0249131	0.00225479	0.0190469	0.0244009	0.00151805	0.00730398	0.000502929	0.00226838	0.00171845	0.0175858	0.00381982	0.000231797	0.0190343	0.0049578	0.0165357	0.0176026	0.0125971	0.0229697	0.0233532	0.00801185	0.0106111	0.000532318	0.00667131	0.000190603	0.0186781	0.00966569	0.0253907	0.00994458	0.0144603	0.000146888	0.000100965	8.66163e-05	0.00476939
Woeseia	9.30709e-05	2.7115e-05	1.33668e-05	2.81555e-05	1.35847e-05	5.68521e-05	0	2.91732e-05	1.40495e-05	0	0	0	0	0.000125365	0	4.92595e-05	0	4.45025e-05	9.06276e-05	0	1.3554e-05	0.000100448	0	1.36649e-05	1.35311e-05	0.000120348	0.000317117	0	0.000141929	0	0.000143664	4.67326e-05	0.00651958	0.000100159	0.000143369	0.00400592	5.9446e-05	2.66159e-05	0.00291573	1.36145e-05	0.000184931	0.00184108	0	0.000404134	0.00721089	0	0	0	2.80552e-05
Xanthomonas	0.000806614	6.77874e-05	1.33668e-05	2.81555e-05	0.000176602	0.000184769	0	0	1.40495e-05	0	1.40258e-05	0	0	0.000949191	0	0.00136285	0.00127318	8.90049e-05	0.000906276	0.00176331	9.48779e-05	0.000344392	1.35927e-05	9.56546e-05	6.76553e-05	0.000872522	0.000216216	1.36351e-05	0.00110389	0	0.000718319	0.00110601	0.000994512	0.00133545	0.00148148	0.000841581	0.00040126	2.66159e-05	0.000380312	0	0.00103253	0.00102794	0.00138047	0.000433	0.00131107	0	0	2.88721e-05	0.000140276
[Bacteroides]_pectinophilus_group	0	0	0	0	0	0	0	0	0	0	0	0	0	0	1.43174e-05	0	0	0	0	0	0	0	0	0	0	0	0	0	0	0.0178098	1.43664e-05	4.67326e-05	1.84169e-05	0	0	0	0	0	0	0	0	0	0	0	1.92805e-05	0	0	0	0
[Clostridium]_innocuum_group	0	0	2.67337e-05	0	0	0	0	2.91732e-05	9.83464e-05	0	9.81808e-05	0	1.38311e-05	0	4.29523e-05	0	0	0	0	0	0.00013554	2.86993e-05	0.000135927	0	0.000405932	0	1.44144e-05	1.36351e-05	1.57699e-05	1.36578e-05	0	1.55775e-05	0	0	0	0	8.91689e-05	0.000399239	0	0.00992498	3.08219e-05	1.53424e-05	0	0	1.92805e-05	0.000146888	0	1.44361e-05	7.0138e-05
[Eubacterium]_eligens_group	0.00921402	0.00300976	0.000347538	0.0031675	5.4339e-05	0.00137866	0.00689397	0.00137114	0.00890737	0.00746018	0.000126233	0.012845	8.29864e-05	0.00128947	7.15871e-05	8.20991e-05	0	0.00155759	0.00925912	5.03804e-05	0.00860679	0.00961428	0.0033438	0.0321399	1.35311e-05	9.02609e-05	0.00586667	1.36351e-05	3.15398e-05	0.0120189	7.18319e-05	0.000358283	0.00342554	0.000250396	3.18598e-05	0.0039386	0.000445845	1.3308e-05	0.000110924	0.000163374	1.54109e-05	0.000613695	0	0.00444547	0.000250646	0.00453884	0.00132697	0.000765111	0.000967905
[Eubacterium]_hallii_group	0.000139606	0.000189805	0.00149709	0.000168933	0.000434712	0.000369539	0.000179843	0.000350079	0.000309089	0.000350572	0.000547008	0.000376974	0.000816033	0.000125365	0.000615649	1.64198e-05	1.72052e-05	0.000726874	0.000120837	3.35869e-05	0.00047439	0.000172196	0.00125053	0.000792566	0.000811864	6.01739e-05	0.000273874	9.54459e-05	0.000110389	0.00069655	1.43664e-05	0.00018693	0.000147335	0.000500793	0	0.000336632	0.000341814	6.65398e-05	0.000285234	0.00014976	0.000138698	0.000107397	0	0.000938168	0.000616975	0.000176266	0.000591366	0.000461954	0.000575132
[Eubacterium]_ruminantium_group	0.0111995	0.000135575	0.000120302	0.00450488	2.71695e-05	0.000270047	0	0.0043614	2.8099e-05	8.41373e-05	8.4155e-05	0.00578027	2.76621e-05	0.00207748	0.000529744	1.64198e-05	0	0.000637869	3.02092e-05	0.00107478	0.00218219	2.86993e-05	0.000434966	0.0021044	8.11864e-05	1.50435e-05	0.0127423	4.09054e-05	0	0.0465596	7.18319e-05	3.11551e-05	0.00292828	0.000116852	0.000270808	0.00499899	0.00989775	1.3308e-05	0.000285234	0.000122531	0.00016952	0.000107397	0	0.0001732	7.71218e-05	0.00177735	4.32707e-05	0.00801201	1.40276e-05
[Eubacterium]_siraeum_group	0.00255945	0.00300976	2.67337e-05	0.000211166	2.71695e-05	8.52781e-05	0.0215511	0.000116693	0.000140495	0.00113585	0.000294543	0.00435614	0.000345777	8.95464e-05	0.000587014	8.20991e-05	5.16156e-05	0.00548864	3.02092e-05	0	0	0	0.00116897	0.00269199	0	1.50435e-05	7.20721e-05	0	0	0.0014887	0	0.000420594	1.84169e-05	6.67724e-05	6.37196e-05	5.04948e-05	0.000237784	0	0.000142617	0	0.000339041	0.000122739	0	0.000779401	3.85609e-05	0.00846076	0.000778872	0.0454447	7.0138e-05
[Eubacterium]_ventriosum_group	0.000403307	0.000894794	0.000200503	0.0021539	2.71695e-05	0.00075329	0.00181341	0.00571795	7.02474e-05	0.000560915	0.000210388	0.00187091	0.000816033	0.000644734	0.000157492	4.92595e-05	0.000103231	0.00381238	0.00143494	1.67935e-05	0.00333428	0.000215245	0.00164471	0.00252801	0.000270621	1.50435e-05	5.76577e-05	9.54459e-05	7.88494e-05	0.00219891	4.30991e-05	0.000155775	0.000239419	5.00793e-05	0	0.00176732	0.000341814	2.66159e-05	0.00126771	0.000340363	1.54109e-05	1.53424e-05	0	0.0003031	9.64023e-05	0.00719752	0.00175967	0.00734795	0.000434856
[Eubacterium]_xylanophilum_group	0.00130299	9.49024e-05	2.67337e-05	0.00109807	0	0.000383752	0.00337205	0.000670984	2.8099e-05	0.000518847	2.80517e-05	0.00382559	0.00026279	0.000197002	0.000157492	4.92595e-05	3.44104e-05	0.00225479	0	1.67935e-05	4.0662e-05	0.000215245	0.000502929	1.36649e-05	1.35311e-05	0	0.00113874	0	0	0.000341446	0	0.000280396	0.000202586	6.67724e-05	1.59299e-05	0.000589107	0.000921412	1.3308e-05	4.75391e-05	2.7229e-05	0.000277397	1.53424e-05	3.28682e-05	0.000418567	3.85609e-05	0.00296714	0.00311549	2.88721e-05	8.41656e-05
[Ruminococcus]_gauvreauii_group	7.75591e-05	0.000433839	0.00160402	0.00204128	0.000502635	0.000255834	0.00019483	0.000189626	0.000168594	5.60915e-05	1.40258e-05	0.000530556	8.29864e-05	3.58185e-05	0.000229079	0	0	0.00235863	0.000241674	0	0.000921671	4.3049e-05	0.000815561	0.000710577	2.70621e-05	3.0087e-05	0.000273874	0.000272702	0.000252318	6.82892e-05	0	4.67326e-05	0.000110501	0.000283783	1.59299e-05	0.000370296	5.9446e-05	0	4.75391e-05	0.000122531	0.00032363	1.53424e-05	1.64341e-05	0.000245367	3.85609e-05	0.000161577	2.88471e-05	0.000317593	0.000224442
[Ruminococcus]_gnavus_group	0	6.77874e-05	0.00185799	2.81555e-05	0.000230941	4.26391e-05	7.49344e-05	1.45866e-05	0.000210742	4.20687e-05	0.000799473	1.3962e-05	4.14932e-05	0.000429823	7.15871e-05	0.000328396	3.44104e-05	0.000252181	0.000151046	3.35869e-05	0.000921671	0.000186546	0.000584485	0.00340257	0.0020026	0	5.76577e-05	0.0005045	9.46193e-05	0.000163894	0.000186763	0.000155775	0.000165752	0.000200317	1.59299e-05	0.00010099	0	0.200977	4.75391e-05	0.000435665	9.24656e-05	0.000460271	0.000147907	0.000101033	0.000250646	0.00402474	0.000288471	0.000288721	0.000210414
[Ruminococcus]_torques_group	0.00373835	0.00220987	0.0054002	0.000281555	0.00054339	0.00258677	0.00659423	0.00317988	0.00207932	0.00019632	0.00262283	0.00156374	0.00278004	0.00073428	0.00137447	1.64198e-05	0	0.00318934	6.04184e-05	6.71738e-05	0.00592309	0.00703134	0.00539629	0.00531566	0.00527712	7.52174e-05	0.000792793	0.00248159	0.00509367	0.00031413	5.74655e-05	0.00325571	0.00132602	0.000851348	0.000302668	0.000572275	0.00647961	0.000106464	0.00172725	0.00235531	0.000785958	0.00058301	6.57365e-05	0.000230934	0.00528284	0.00741785	0.00210584	0.000649622	0.0105347
unclassified_Acetobacteraceae	0.000791102	5.42299e-05	4.01005e-05	4.22333e-05	0.00025811	0.000198982	1.49869e-05	0	1.40495e-05	0	0	1.3962e-05	0	0.00123574	0	0.00110013	0.00137642	4.45025e-05	0.000860962	0.00112516	5.4216e-05	0.000344392	1.35927e-05	9.56546e-05	1.35311e-05	0.000962782	0.000158559	0	0.00105658	0	0.000531556	0.00116832	0.000607757	0.00110174	0.00117881	0.000706928	0.000460706	0	0.00034862	2.7229e-05	0.00101712	0.000644379	0.00123256	0.000635067	0.00084834	1.46888e-05	0	1.44361e-05	0.000154304
unclassified_Aerococcaceae	0	0	0	0	0	1.4213e-05	0	0	0	0	0	0	0	0	0	0	0	0	0	0	0	0	0	0	0	0	0	0	0	0	0	1.55775e-05	0	0	0	0	0	0	0	0	0	0	0	0	0	0	0	0	0
unclassified_Anaerolineaceae	3.10236e-05	4.06725e-05	0	1.40778e-05	0	0	0	0	0	0	0	0	0	0	1.43174e-05	0	0	0	3.02092e-05	0	0	0	0	0	4.05932e-05	1.50435e-05	7.20721e-05	0	3.15398e-05	0	4.30991e-05	0	0.00209952	3.33862e-05	3.18598e-05	0.00104356	1.48615e-05	1.3308e-05	0.00069724	0	0.00016952	0.000629037	0	2.88667e-05	0.00229437	0	0	1.44361e-05	0
unclassified_Anaerovoracaceae	0	0	0	0	0	1.4213e-05	0	0	0.010495	0	0	1.3962e-05	0	1.79093e-05	2.86348e-05	0	0	0	0	0	0	5.73987e-05	0	0.000245969	0	0	0	0	0	0	0	4.67326e-05	0	1.66931e-05	0	0	1.48615e-05	0	3.16927e-05	0.000163374	0	1.53424e-05	0	1.44333e-05	0	0.000132199	1.44236e-05	0.000202105	0.000210414
unclassified_Bacilli	0.0541362	0.00803959	0.00104261	0.000915055	0.0343015	0.0198698	0.000374672	0.000539705	0.000140495	0.00019632	5.61033e-05	9.7734e-05	9.68175e-05	0.0644197	0.000214761	0.0894552	0.0911875	0.0090785	0.0740579	0.0881153	0.00646525	0.027207	0.000475744	0.00937415	0.00595367	0.0726149	0.0209153	0.000599945	0.0782817	0.000437051	0.0605399	0.0691643	0.0688607	0.0766714	0.0854958	0.0430384	0.0391006	0.000771862	0.0362089	0.00042205	0.0632773	0.0559996	0.0925241	0.0521044	0.0682335	0.000470042	0.000173083	0.000259849	0.0174223
unclassified_Bacteria	0.0195914	0.00154555	0.000441106	0.000295633	0.00667011	0.00459081	0.000299738	0.000175039	0.00054793	0.0290975	0.000224413	9.7734e-05	8.29864e-05	0.0185719	0.000257714	0.0311156	0.0362857	0.00194327	0.0233215	0.0332678	0.00158582	0.0067874	0.000244668	0.00170812	0.00150195	0.0219635	0.0049009	0.000177257	0.0284173	0.00031413	0.0137917	0.0259989	0.0161148	0.0279276	0.0321147	0.0101663	0.0102544	0.000199619	0.0076221	0.000190603	0.022238	0.0137621	0.0322438	0.013957	0.0190298	0.000161577	0.000274048	0.000346465	0.00398384
unclassified_Bacteroidales	1.55118e-05	0	0	0	0	0	0.00043462	0	2.8099e-05	1.40229e-05	0	1.3962e-05	0	0	0	1.64198e-05	0	0.00998339	0	0	0	0	2.71854e-05	1.36649e-05	1.35311e-05	1.50435e-05	2.88288e-05	0	4.73097e-05	0.00438417	1.43664e-05	0	0.00263361	1.66931e-05	0	1.68316e-05	0.00994234	0	0.000665547	0	0	0	0	0	1.92805e-05	0	0	0	1.40276e-05
unclassified_Bacteroidia	3.10236e-05	6.77874e-05	0	0.00123884	1.35847e-05	0	1.49869e-05	0	0	9.81602e-05	4.20775e-05	0	0	0	0	1.64198e-05	1.72052e-05	1.48342e-05	0	0	0	0.000286993	1.35927e-05	0.000423613	0	0	0.000432432	0	0	0	0	0	0	0	0	1.68316e-05	5.9446e-05	1.3308e-05	1.58464e-05	0	0	1.53424e-05	0	0	0	8.81329e-05	1.44236e-05	0	0
unclassified_Carnobacteriaceae	0.000480866	8.13449e-05	0	0	0.000217356	0.000156343	0	1.45866e-05	1.40495e-05	1.40229e-05	0	0	0	0.000465641	0	0.000853831	0.000739823	5.93366e-05	0.000498452	0.00110837	1.3554e-05	0.000301343	0	0.000109319	0	0.000346	5.76577e-05	1.36351e-05	0.000520406	0	0.000430991	0.000436171	0.000128918	0.000801269	0.000653126	8.41581e-05	0.000237784	1.3308e-05	7.92318e-05	0	0.000369862	0.000199451	0.000772404	0.000115467	9.64023e-05	0	0	0	0.000182359
unclassified_Christensenellaceae	7.75591e-05	2.7115e-05	0.000106935	0.000858744	4.07542e-05	0.00193297	5.99475e-05	1.45866e-05	1.40495e-05	4.20687e-05	1.40258e-05	0.000321126	0.000138311	0.000143274	0.0104517	0	0	0.000192844	0	0	0	0.00044484	0.000122334	0.00295163	5.41243e-05	9.02609e-05	0.00726486	8.18107e-05	7.88494e-05	0.00187112	0	1.55775e-05	0.00029467	1.66931e-05	9.55795e-05	0.000403959	0.0027791	1.3308e-05	4.75391e-05	0	1.54109e-05	4.60271e-05	0	0.000158767	9.64023e-05	5.87553e-05	0.000331742	1.44361e-05	0
unclassified_Clostridia_UCG_014	0.00442087	0.00581616	0.000748543	0.0432328	0.00025811	0.00464766	0.00530536	0.0057763	0.000337188	0.0204173	0.000182336	0.035631	0.0147577	0.00216702	0.0211611	0.000246297	0.000137642	0.00462826	0.000120837	0.000403043	0.00767156	0.00150672	0.0475336	0.00844493	0.000162373	0.000120348	0.00377658	8.18107e-05	4.73097e-05	0.029979	0.000100565	0.00426825	0.000791926	0.000367248	0.00592593	0.0286306	0.049459	6.65398e-05	0.000475391	0.00042205	0.00214212	0.000567668	9.86047e-05	0.00391144	0.000520572	0.0403502	0.0025097	0.00857502	4.20828e-05
unclassified_Coriobacteriales_Incertae_Sedis	0.00017063	0.00126085	1.33668e-05	0.0003801	0	4.26391e-05	0.000569502	1.45866e-05	1.40495e-05	1.40229e-05	2.80517e-05	0.000195468	8.29864e-05	7.16371e-05	0.000515427	0	0	0.000637869	0	0	0	0.000258294	0	0.000273299	0	0.000165478	0.000302703	0	0	0.00195307	1.43664e-05	1.55775e-05	7.36675e-05	5.00793e-05	3.18598e-05	0.000269306	1.48615e-05	0	1.58464e-05	0	4.62328e-05	1.53424e-05	1.64341e-05	0.00261244	0.000115683	8.81329e-05	0.000533672	0	8.41656e-05
unclassified_Cyanobacteriales	0.000573937	0.000122017	0.000387638	1.40778e-05	0.000421127	0.000213195	0.00019483	0.000116693	0.000379336	0.00549697	0.000406749	0.000153582	0.000179804	0.000519369	0.00038657	0.00106729	0.00130759	0.000252181	0.000649498	0.00104119	0.000108432	0.000315693	8.15561e-05	9.56546e-05	6.76553e-05	0.000481391	0.000115315	1.36351e-05	0.00118274	9.56049e-05	0.000531556	0.000996962	0.000773509	0.000984893	0.00105137	0.000403959	0.000490429	1.3308e-05	0.000380312	5.44581e-05	0.000801368	0.000613695	0.00115039	0.000562901	0.000674816	0.000205643	0.000187506	7.21803e-05	0.000140276
unclassified_Desulfovibrionaceae	0	2.7115e-05	0.000147035	2.81555e-05	2.71695e-05	1.4213e-05	1.49869e-05	1.45866e-05	4.21484e-05	4.20687e-05	0.00016831	4.1886e-05	2.76621e-05	0	5.72697e-05	3.28396e-05	1.72052e-05	0.00043019	1.51046e-05	0	8.1324e-05	0	9.51488e-05	1.36649e-05	0.000108249	0	1.44144e-05	2.72702e-05	4.73097e-05	2.73157e-05	2.87327e-05	6.23101e-05	0.000184169	6.67724e-05	0	0.000151485	0	3.99239e-05	7.92318e-05	0	0	0.000138081	1.64341e-05	2.88667e-05	0.000366329	4.40665e-05	2.88471e-05	2.88721e-05	0
unclassified_Enterobacterales	0.00255945	0.000664317	0.00163075	4.22333e-05	0.000502635	0.000781716	0.000284751	7.29331e-05	0.000983464	0.00019632	8.4155e-05	6.981e-05	4.14932e-05	0.00419077	0.000186126	0.00371088	0.00418086	0.00136474	0.00270372	0.00401364	0.000379512	0.00114797	1.35927e-05	0.000259634	0.000175904	0.00270783	0.000735135	0.00565858	0.00332745	8.19471e-05	0.0015372	0.00280396	0.00244945	0.00375595	0.00360016	0.00146435	0.00170907	0.000106464	0.00115678	0.000381207	0.00303595	0.00219396	0.00369768	0.00206397	0.0123009	5.87553e-05	4.32707e-05	2.88721e-05	0.000378745
unclassified_Enterobacteriaceae	0.00375386	0.00696855	0.0840908	0.000168933	0.000747161	0.000980699	0.0052604	0.000685571	0.0385096	0.00161263	0.000196362	0.000851682	0.00038727	0.00531905	0.00483929	0.00479459	0.00574653	0.00947902	0.0039272	0.00602885	0.00473034	0.00209505	0.000258261	0.000505603	0.000527712	0.00400156	0.000879279	0.0250477	0.00485712	0.00101068	0.00258595	0.00468884	0.00257836	0.0058092	0.0044763	0.00169999	0.00682142	0.00196958	0.0163693	0.386911	0.00602567	0.00262354	0.00534109	0.0022949	0.00347048	0.000719752	0.00131254	0.000288721	0.000420828
unclassified_Intrasporangiaceae	6.20472e-05	1.35575e-05	1.33668e-05	0	9.50932e-05	1.4213e-05	0	0	1.40495e-05	0	0	0	0	0.000161183	0	0.000180618	6.88208e-05	2.96683e-05	0.000181255	0.000218315	0	1.43497e-05	0	2.73299e-05	0	4.51304e-05	0	1.36351e-05	4.73097e-05	0	0.000114931	4.67326e-05	0.000257836	0.000317169	0.000207089	0.000168316	4.45845e-05	0	9.50781e-05	1.36145e-05	7.70547e-05	9.20542e-05	0.000312248	0.000101033	0.000212085	0	1.44236e-05	1.44361e-05	2.80552e-05
unclassified_Lachnospiraceae	0.00632882	0.00569414	0.0144897	0.0261987	0.0101886	0.00891157	0.0136231	0.00932085	0.023294	0.0102367	0.0469725	0.0123424	0.00791137	0.00311621	0.0115398	0.000591114	0.000378514	0.0162582	0.00448607	0.000470217	0.0174847	0.0187407	0.00693227	0.00930582	0.0479406	0.0014893	0.0177009	0.0152168	0.000315398	0.0170177	0.000574655	0.00257029	0.00421747	0.00153576	0.000525687	0.00573958	0.00603377	0.0106064	0.00377143	0.00705232	0.00314383	0.00291505	0.000328682	0.00228047	0.00439594	0.0163927	0.0134428	0.0120397	0.00716811
unclassified_Lactobacillaceae	0.000806614	2.7115e-05	1.33668e-05	1.40778e-05	0.000176602	0.000170556	1.49869e-05	1.45866e-05	0	0	0	0	0	0.00216702	0	0.00116581	0.00201301	5.93366e-05	0.000906276	0.00186407	4.0662e-05	0.000243944	1.35927e-05	2.73299e-05	1.35311e-05	0.000947739	0.00012973	0	0.00123005	1.36578e-05	0.000488457	0.000856765	0.000976095	0.00156915	0.00125846	0.00062277	0.00029723	0	0.000380312	0	0.00101712	0.000444929	0.00154481	0.000360834	0.000983303	1.46888e-05	0	0	8.41656e-05
unclassified_Microbacteriaceae	0.000232677	0	8.0201e-05	1.40778e-05	5.4339e-05	5.68521e-05	0	0	2.8099e-05	0	0	0	0	0.000304458	1.43174e-05	0.000443335	0.000395719	2.96683e-05	0.000241674	0.00043663	4.0662e-05	0.000114797	0	4.09948e-05	4.05932e-05	0.000240696	4.32432e-05	2.72702e-05	0.000346937	0	0.000287327	0.00018693	0.000423588	0.000333862	0.000350458	0.000302969	0.000118892	0	0.000158464	0	0.000292808	0.000199451	0.000427287	8.66001e-05	0.000308487	0	0	0	5.61104e-05
unclassified_Mitochondria	0.00680969	0.000582972	0.000147035	4.22333e-05	0.00256752	0.00149237	0.00019483	7.29331e-05	0.000182643	0.00566525	0.000126233	2.7924e-05	0.000110649	0.00816663	0.000128857	0.0112476	0.0108393	0.000771376	0.00750699	0.0109661	0.000623484	0.0023103	9.51488e-05	0.000778901	0.00063596	0.00722087	0.00165766	2.72702e-05	0.0081688	8.19471e-05	0.00543049	0.00808474	0.00681425	0.0100826	0.0105775	0.00417424	0.00371537	9.31557e-05	0.00291573	5.44581e-05	0.00679622	0.00509367	0.0103699	0.00427227	0.00715305	7.34441e-05	8.65414e-05	0.000101052	0.00124846
unclassified_Muribaculaceae	0.000217165	0.000149132	0.000454473	0	0.000149432	0.000127917	1.49869e-05	5.83465e-05	4.21484e-05	4.20687e-05	0.00180933	2.7924e-05	8.29864e-05	0.000322367	0.021247	0.000788151	0.000602182	0.000207678	0.000226569	0.000822879	6.777e-05	5.73987e-05	0.000135927	9.56546e-05	4.05932e-05	0.000992869	0.00138378	0.112817	0.000441557	0.00513535	0.00015803	0.00143313	0.000128918	0.000884734	0.000334528	0.00010099	0.0179527	0.000119772	0.000158464	8.16871e-05	0.00223459	0.000168766	0.000788838	0.000101033	0.000192805	0	0.00539441	0.000115488	8.41656e-05
unclassified_Nostocaceae	4.65354e-05	0	0.000147035	0	0.000122263	4.26391e-05	7.49344e-05	0	1.40495e-05	0.000967579	4.20775e-05	0	1.38311e-05	0.000125365	1.43174e-05	0.000180618	0.000103231	1.48342e-05	0.000135941	0.000268695	4.0662e-05	1.43497e-05	1.35927e-05	4.09948e-05	0.000906582	0.000150435	0	0	0.000410017	5.46314e-05	2.87327e-05	0.000171353	0.000110501	0.000133545	0.000143369	3.36632e-05	5.9446e-05	0	4.75391e-05	0	7.70547e-05	9.20542e-05	0.000197209	4.33e-05	3.85609e-05	2.93776e-05	2.88471e-05	2.88721e-05	1.40276e-05
unclassified_Oscillospiraceae	0.00034126	0.000257592	0.000374272	0.000323789	4.07542e-05	0.00046903	0.000389659	0.00094813	0.000786771	0.000743213	7.01292e-05	0.00129847	0.00113415	0.000125365	0.000300666	9.85189e-05	8.60259e-05	0.0111998	0	6.71738e-05	0.00013554	0.000904029	0.000231076	0.00125717	0.000622429	4.51304e-05	0.00184505	0.0017862	4.73097e-05	0.000641919	4.30991e-05	0.000202508	0.000405171	6.67724e-05	0	0.000353464	0.00323981	5.32318e-05	0.000427852	0.000544581	0.000138698	7.67118e-05	6.57365e-05	0.000331967	0.000385609	0.00138075	0.00125485	0.00189112	0.0014729
unclassified_Prevotellaceae	0	0	0.000160402	0	0	0	0	1.45866e-05	1.40495e-05	1.40229e-05	0	0	0	0	0	0	0	0	0	0	0	0	1.35927e-05	0	0	0	0	0	0	0.00335983	0	0	0	0	0	1.68316e-05	0.00462192	1.3308e-05	0.00017431	0	0	1.53424e-05	0	0	0	0	0.00248085	1.44361e-05	0
unclassified_RF39	0.0010548	0	8.0201e-05	0.0233128	0	0.00180505	0.00329712	4.37598e-05	1.40495e-05	4.20687e-05	1.40258e-05	4.1886e-05	0.0106499	0.000161183	0	3.28396e-05	1.72052e-05	0.000192844	1.51046e-05	5.03804e-05	1.3554e-05	0	0.00517881	0.000177644	0	4.51304e-05	0.00462703	0	0	0.0033052	2.87327e-05	1.55775e-05	1.84169e-05	1.66931e-05	0.00105137	0.000387127	0.00616752	0	0.000206003	1.36145e-05	0.00016952	1.53424e-05	8.21706e-05	2.88667e-05	1.92805e-05	0	0	5.77442e-05	0
unclassified_Rhizobiaceae	0.000279213	1.35575e-05	0.000120302	4.22333e-05	9.50932e-05	0.000127917	1.49869e-05	0	5.61979e-05	2.80458e-05	2.80517e-05	0	2.76621e-05	0.00048355	7.15871e-05	0.000476175	0.000602182	7.41708e-05	0.000302092	0.000503804	4.0662e-05	5.73987e-05	0	5.46597e-05	0	0.000330956	0.000100901	6.81756e-05	0.000362707	1.36578e-05	0.000272961	0.000249241	0.000460422	0.000350555	0.000318598	0.000252474	0.000208061	0	0.000126771	0	0.000292808	0.000306847	0.00055876	0.000187634	0.000539853	1.46888e-05	1.44236e-05	2.88721e-05	4.20828e-05
unclassified_Rhodospirillales	0	0	0	0	0	0	0	0	0	0	0	0	0	0	0	0	0	0	0	0	0	1.43497e-05	0	0.00218639	0	0	0	0	0	0	0	0	0	0	0	0	0	0	0	0	0	0	0	0	0	0	0	0	0
unclassified_Ruminococcaceae	0.000310236	0.000854121	0.000708442	0.00639131	0.000217356	0.0650814	0.000494567	0.0649104	0.00137685	0.000813327	0.000210388	0.00226184	0.0361959	0.00171929	0.0130288	0.000147778	5.16156e-05	0.0011274	9.06276e-05	3.35869e-05	0.000189756	0.00406096	0.00254183	0.0323996	0.000148842	0.000165478	0.00507387	8.18107e-05	0.000157699	0.0138627	7.18319e-05	7.78877e-05	0.000810343	0.000317169	0.000382318	0.00982966	0.028222	0.000266159	0.082718	0.00940763	0.00157192	0.000383559	0.000147907	0.158406	0.00316199	0.00161577	0.088402	0.0240649	0.0012204
unclassified_UCG_010	0.000186142	0.000338937	0.000133668	0.0043078	1.35847e-05	0.000170556	0.000404646	0.000466772	1.40495e-05	0	1.40258e-05	0.0016894	5.53243e-05	0.000107456	0.00479633	1.64198e-05	1.72052e-05	0.00140924	0	1.67935e-05	0	7.17484e-05	0.00183501	0.00121618	4.05932e-05	0	0.00276757	1.36351e-05	0	0.00131115	1.43664e-05	3.11551e-05	0.000147335	5.00793e-05	3.18598e-05	0.000942571	0.00796576	0	3.16927e-05	1.36145e-05	4.62328e-05	0.000122739	3.28682e-05	0.000331967	0	0.000176266	0.000822143	4.33082e-05	0.000364718
unclassified_[Eubacterium]_coprostanoligenes_group	0.000620472	0.00349783	0.000788644	0.00630684	0.000203771	0.00531567	0.00947171	0.00635976	0.000238841	0.003674	0.000224413	0.00770702	0.014495	0.00197002	0.0254993	0.000262717	0.000189257	0.00541447	0.000211464	0.000654945	0.00398487	0.00342957	0.00723131	0.0207434	0.00611604	0.000361043	0.0298234	0.000259067	0.000220778	0.0346363	0.000287327	0.00373861	0.00248628	0.000467407	0.00323377	0.0132128	0.0311348	0.000186311	0.00316927	0.00325387	0.000215753	0.000782461	0.000115039	0.0119219	0.00726873	0.00287901	0.0357849	0.0241804	0.0247447
uncultured_Acetivibrio_sp.	0.00103929	0.00143709	5.34674e-05	0.00336459	5.4339e-05	0.0003269	0.00181341	5.83465e-05	0	1.40229e-05	1.40258e-05	0.00681345	2.76621e-05	5.37278e-05	0	3.28396e-05	1.72052e-05	0.0018691	0	0	0.000108432	0	0.0340904	2.73299e-05	1.35311e-05	7.52174e-05	0	1.36351e-05	0	0	1.43664e-05	0	0.000276253	0.000166931	3.18598e-05	0.000201979	0.00451789	2.66159e-05	1.58464e-05	0	0.000123287	1.53424e-05	4.93024e-05	0.0029877	0.000115683	0.00342249	2.88471e-05	0	0
uncultured_Clostridiales_bacterium	0	0	0	0	0	0	0	0	0	1.40229e-05	0	0	0	0	0	0	0	0	0	0	0	0	0	0	0	0	0	0	3.15398e-05	0	0	1.55775e-05	0	0	0	0	1.48615e-05	0	0	4.08436e-05	0	0	0	0	0	0	0	0	0
uncultured_Erysipelotrichaceae_bacterium	0	0	2.67337e-05	0.00233691	0	1.4213e-05	0.00119895	0	0	5.60915e-05	2.80517e-05	0.00230373	0	1.79093e-05	1.43174e-05	1.64198e-05	0	0.000148342	0	1.67935e-05	0	0	1.35927e-05	0	0	0	0	0	1.57699e-05	0.000122921	0	0	0	3.33862e-05	7.96495e-05	0.000319801	4.45845e-05	0	0	0	3.08219e-05	0	0	0	0	1.46888e-05	0	0	0
uncultured_Firmicutes_bacterium	0	0	0	0	0	0	0	0	0	0	0	0.00212222	6.91553e-05	1.79093e-05	0	1.64198e-05	0	0.000370854	0	0	0	0	1.35927e-05	0	0	0	1.44144e-05	0	0	0	0	0	1.84169e-05	0	0	3.36632e-05	1.48615e-05	0	1.58464e-05	0	0	1.53424e-05	0	0	0	1.46888e-05	0	0	0
uncultured_Porphyromonadaceae_bacterium	0.000248189	2.7115e-05	5.34674e-05	0	0	0	1.49869e-05	7.29331e-05	0	0	0.00016831	0.000111696	2.76621e-05	0	2.86348e-05	0	0	0.000207678	0	0	0	0	0.000326224	0.000204974	0.000284152	0.000361043	0.000144144	0.000163621	0.000236548	0	0	0	0.000110501	0	0	5.04948e-05	0	0	1.58464e-05	0	4.62328e-05	6.13695e-05	0	0	7.71218e-05	2.93776e-05	0	1.44361e-05	0
uncultured_Ruminococcaceae_bacterium	0.000325748	0	2.67337e-05	0.00297041	2.71695e-05	0.000213195	1.49869e-05	0.00125445	1.40495e-05	5.60915e-05	1.40258e-05	0.00132639	1.38311e-05	7.16371e-05	0	3.28396e-05	3.44104e-05	0.00108289	0	5.03804e-05	0	0.000186546	0.000434966	0	0	1.50435e-05	0	0	1.57699e-05	0.000122921	1.43664e-05	3.11551e-05	3.68338e-05	0	4.77897e-05	0.000572275	0.00059446	0	0	0	6.16437e-05	1.53424e-05	9.86047e-05	0.001732	3.85609e-05	0.00376034	0.00252412	5.77442e-05	0
uncultured_Thermoanaerobacterales_bacterium	0	2.7115e-05	2.67337e-05	0	0	0	2.99738e-05	0	0	0	0	2.7924e-05	1.38311e-05	0	0.000744506	0	0	0	0	0	0	0	0	0	0	0	0	0	0	0	0	0	5.52507e-05	0	0	0	1.48615e-05	0	0	0	0	0	0	0	0	0	0	0	0
uncultured_gamma_proteobacterium	1.55118e-05	0	0	0	0	1.4213e-05	1.49869e-05	0	0	0	0	0	0	3.58185e-05	0	0	0	0	4.53138e-05	0	0	5.73987e-05	0	0	0	3.0087e-05	8.64865e-05	0	1.57699e-05	0	7.18319e-05	0	0.00154702	0	0	0.000908907	1.48615e-05	0	0.000459544	0	9.24656e-05	0.000276163	0	5.77334e-05	0.00154244	0	0	0	0
uncultured_prokaryote	0	0	0	0	0	0	0	0	0	0	0	0	0	0	0	0	0	0	0	3.35869e-05	2.7108e-05	2.86993e-05	1.35927e-05	1.36649e-05	2.70621e-05	0	0	0	0	0	0	0	0	0	0	0	4.45845e-05	0	1.58464e-05	0	0	3.06847e-05	0	0	0	0	0	0	0
uncultured_rumen_bacterium	0.000713543	0.000189805	4.01005e-05	0.0106991	0	0.00093806	0.000179843	4.37598e-05	1.40495e-05	0.000140229	0	0.00156374	1.38311e-05	3.58185e-05	0.000672919	3.28396e-05	1.72052e-05	0.00560731	0	1.67935e-05	0	0.00282689	0.000135927	0.0086909	0	0	0.000936937	0	3.15398e-05	0	2.87327e-05	0.000669834	0.000920844	0	0.000605337	0.0010099	0.00176852	1.3308e-05	3.16927e-05	2.7229e-05	0.000138698	6.13695e-05	3.28682e-05	0.000736101	1.92805e-05	8.81329e-05	0	0	0.0040119
[truncated: 179 more columns]

## Sheet: Species
Species	JC100	JC107	JC108	JC118	JC119	JC120	JC132	JC135	JC140	JC141	JC145	JC149	JC151	JC16	JC162	JC19	JC2	JC23	JC25	JC30	JC31	JC35	JC40	JC42	JC43	JC45	JC47	JC54	JC61	JC64	JC69	JC70	JC75	JC76	JC81	JC83	JC89	JC9	JC93	JF1	JF109	JF112	JF116	JF122	JF128	JF129	JF138	JF139	JF14
Acidaminococcus_sp._Marseille_P2828	0	1.35575e-05	0	0	1.35847e-05	0	0	0	0	0	0	0	0	0	0	0	0	5.93366e-05	0	1.67935e-05	6.777e-05	2.86993e-05	0	0	0	0	0	0	1.57699e-05	1.36578e-05	0	0	0	0	0	0	0	0.00380608	0	0	0	0	0	0	0	0	0	0	0
Alistipes_finegoldii	0.000310236	1.35575e-05	2.67337e-05	9.85444e-05	0	7.10651e-05	1.49869e-05	1.45866e-05	0	0	1.40258e-05	0.00013962	0.000885188	8.95464e-05	0.000257714	0	0	4.45025e-05	0	0	0	0.000229595	0.00430888	0.00774802	0.00343689	1.50435e-05	0.000187387	0.000163621	0	0.000177552	0	0.000140198	0.000110501	0	0	0	0.00120378	0	0.000554622	0	1.54109e-05	0	0	2.88667e-05	0	0.000293776	1.44236e-05	0	0.000378745
Alistipes_indistinctus	7.75591e-05	0	0	5.63111e-05	1.35847e-05	0.000170556	0	0	0	1.40229e-05	0	4.1886e-05	0.000165973	0	0.00336459	0	0	7.41708e-05	0	0	0	8.6098e-05	0	4.09948e-05	0	0	1.44144e-05	0	0	6.82892e-05	0	0	1.84169e-05	0	4.77897e-05	0.000218811	7.43075e-05	0	0	1.36145e-05	1.54109e-05	1.53424e-05	0	0	1.92805e-05	0	0	0	7.0138e-05
Alistipes_inops	0	0	4.01005e-05	0	1.35847e-05	0	1.49869e-05	1.45866e-05	0	1.40229e-05	0	0	1.38311e-05	0	0	1.64198e-05	0	0.000593366	1.51046e-05	0	0	0	2.71854e-05	0.000355288	0	0	1.44144e-05	0	0	0	0	0	1.84169e-05	0	0	0.00175049	0.000549875	0	0	1.36145e-05	1.54109e-05	0	0	2.88667e-05	1.92805e-05	0	0	0	0
Alistipes_obesi	0.000465354	5.42299e-05	4.01005e-05	0.00115438	0	0.000454817	0.000944174	0	0	0.00102367	1.40258e-05	0.000321126	2.76621e-05	3.58185e-05	0.00210466	0	0	4.45025e-05	0	0	0	0.000530938	0	0.000601257	0	0	7.20721e-05	2.72702e-05	1.57699e-05	0.000969707	1.43664e-05	3.11551e-05	3.68338e-05	0	3.18598e-05	3.36632e-05	0.00156046	0	0.00017431	0	1.54109e-05	1.53424e-05	0	0	0	5.87553e-05	0.00178852	4.33082e-05	0.00220233
Alistipes_onderdonkii	0.000155118	0.000840564	0.000213869	0.000112622	1.35847e-05	0.000156343	0.00289247	1.45866e-05	0.00112396	0.00363193	2.80517e-05	0.00256901	0.0381323	0.000752189	0.00044384	0.000131359	0	4.45025e-05	0.000513556	5.03804e-05	2.7108e-05	0.000157846	5.43707e-05	0.00871823	0.00822689	0	0.00112432	0.000927188	1.57699e-05	0.000737524	2.87327e-05	7.78877e-05	0.000442005	1.66931e-05	0.000159299	0.000353464	0.00515694	2.66159e-05	0.00103001	0.0318716	0.000308219	9.20542e-05	1.64341e-05	4.33e-05	9.64023e-05	0.000587553	0.00429822	0.0115055	0.000547077
Alistipes_shahii	0.00229575	0.000528742	0.000133668	0.000225244	5.4339e-05	0.0030558	0.000884226	0.00563043	0.00637846	0.00353377	0.000182336	0.00266674	0.00526964	0.000179093	0.00203307	3.28396e-05	0	0.00167626	3.02092e-05	3.35869e-05	2.7108e-05	0.00198025	0	0.00383985	0.00175904	1.50435e-05	0.000345946	0.000218162	0	0.00140676	0	0.000373861	0.00106818	0	6.37196e-05	0.00632869	0.000921412	0	0.00288404	0.000599039	1.54109e-05	1.53424e-05	0	0.0001732	0.00044345	0.00271743	0.0035482	0.00249744	0.00231456
Alistipes_sp._N15.MGS_157	0.000124094	0.000135575	2.67337e-05	5.63111e-05	0	7.10651e-05	0.000164856	0	0.000491732	0.000266435	1.40258e-05	0.00097734	0	3.58185e-05	0.0016465	0	0	1.48342e-05	0	1.67935e-05	0	0.000186546	0	0.000450943	0	0	7.20721e-05	1.36351e-05	0	8.19471e-05	0	0	3.68338e-05	1.66931e-05	4.77897e-05	0.00102673	0.000326953	0	0.000158464	0	0	1.53424e-05	0	4.33e-05	0	0.000396598	5.76942e-05	0	0.000869712
Alistipes_sp._cv1	9.30709e-05	6.77874e-05	1.33668e-05	0.000112622	2.71695e-05	0.000213195	0	0	0	0	0	0	0.000138311	0	0.000415205	0	0	0	0	0	0	0	0	0.000724242	1.35311e-05	0	7.20721e-05	2.72702e-05	0	0	0	3.11551e-05	3.68338e-05	0	3.18598e-05	0.000319801	0.00141184	0	0.000158464	0	3.08219e-05	0	0	0	5.78414e-05	0	0.000129812	0	0
Anaerotignum_lactatifermentans	0	1.35575e-05	5.34674e-05	0	2.71695e-05	0	0	2.91732e-05	0.00307684	0	0	0	0	0	0	3.28396e-05	1.72052e-05	4.45025e-05	0	0	0	0	0.000122334	4.09948e-05	5.41243e-05	1.50435e-05	4.32432e-05	4.09054e-05	0.000110389	0	1.43664e-05	0	0	1.66931e-05	0	1.68316e-05	1.48615e-05	0	1.58464e-05	0.000857715	0	0	4.93024e-05	1.44333e-05	0	1.46888e-05	0	0	0
Bacillus_smithii	0.000760079	0.00010846	4.01005e-05	0	0.000434712	0.000255834	0	0	1.40495e-05	0	0	1.3962e-05	1.38311e-05	0.00214911	0	0.00110013	0.00127318	0.000163176	0.000936485	0.00122592	5.4216e-05	0.000272644	1.35927e-05	0.000122984	6.76553e-05	0.000992869	0.000158559	0	0.00110389	0	0.000703952	0.00113716	0.000847177	0.00123529	0.00133811	0.000673265	0.000416122	0	0.000507083	0	0.000816779	0.00058301	0.00111752	0.0004763	0.000925462	1.46888e-05	0	0	0.000154304
Bacteroides_caccae	0.0011789	0.000149132	0.00263327	0.0041811	0	0.00332585	0.00154365	0.00689947	0.00209337	0.00258021	0.00283322	0.00665987	0.00327796	0.000161183	0.0025485	0	3.44104e-05	0.00281849	1.51046e-05	5.03804e-05	0.000162648	0.00119102	5.43707e-05	0.0118338	0.00305802	0.000661913	0.00405045	0.000599945	0	0.00288181	0.000402258	0.00308435	0.00112343	1.66931e-05	0.000175229	0.00010099	0.00334384	1.3308e-05	0.00497576	5.44581e-05	0.000215753	0.00104328	3.28682e-05	0.000144333	0.000616975	0.00536142	0.00194718	8.66163e-05	0.00224442
Bacteroides_clarus	0.000713543	0	0	1.40778e-05	0	0	4.49607e-05	0	0	2.80458e-05	0	0.00379766	0	0	0	0	0	0	0	0	1.3554e-05	0.000344392	0	0	0	0	0	0.000109081	0	5.46314e-05	0	0	0	1.66931e-05	0.000366388	0	0.000460706	1.3308e-05	0.000459544	0	0.00032363	0	0	0	0	1.46888e-05	1.44236e-05	7.21803e-05	0.00440467
Bacteroides_coprocola	0.0110444	0.0752847	0.00409025	0.0001267	0.00028528	0.013943	0.0625703	0.0169934	0.00026694	0.000182298	0.104044	0.000237354	0.000235128	0.000161183	0.0143604	0.000377656	1.72052e-05	0.00491011	0.000151046	0.00038625	0.000243972	0.0163299	8.15561e-05	5.46597e-05	8.11864e-05	3.0087e-05	0.000533333	0.0473275	9.46193e-05	0.0156519	0.000445358	0.0076953	0.00513831	0.000183624	0.000191159	0.00052178	0.000267507	0.000173003	0.00158464	8.16871e-05	0.0172294	0.011384	6.57365e-05	0.00144333	0.031003	0.000176266	0.0158371	0.000332029	9.81932e-05
Bacteroides_eggerthii	1.55118e-05	0.00577549	0.00292734	0.000211166	6.79237e-05	2.8426e-05	0.00795804	2.91732e-05	1.40495e-05	1.40229e-05	0	4.1886e-05	0	0	0.00190422	1.64198e-05	0	0.000370854	1.51046e-05	0	2.7108e-05	0.000631386	1.35927e-05	0.0192812	1.35311e-05	0	0.00012973	0	0	5.46314e-05	4.30991e-05	0.00012462	7.36675e-05	0	1.59299e-05	0	0.000668767	0	0	0	6.16437e-05	3.06847e-05	0	0.000115467	1.92805e-05	0	0.00227892	2.88721e-05	0
Bacteroides_fragilis	0.000480866	6.77874e-05	0.000187136	0.00133739	0.000122263	0.0003269	5.99475e-05	1.45866e-05	0.000112396	7.01144e-05	0	5.5848e-05	1.38311e-05	5.37278e-05	0.000128857	4.92595e-05	0.000120436	1.48342e-05	0.000740125	3.35869e-05	0	0.0164017	0.0385488	4.09948e-05	0	0.000270783	0.000144144	1.36351e-05	0.000583486	6.82892e-05	0.00614881	4.67326e-05	9.20844e-05	6.67724e-05	9.55795e-05	0.000201979	0.0038194	0.0917318	4.75391e-05	0.027338	7.70547e-05	0.000383559	0.000246512	0.000158767	0.00173524	1.46888e-05	0.000591366	0.0194742	7.0138e-05
Bacteroides_nordii	3.10236e-05	5.42299e-05	0	0.000323789	0	0.000113704	4.49607e-05	0	0.000702474	2.80458e-05	1.40258e-05	0.000111696	0.00128629	3.58185e-05	0.000100222	0	0	8.90049e-05	0	0	0	0.00087533	0	0.000382618	0	1.50435e-05	0.00012973	0.000109081	0	2.73157e-05	1.43664e-05	0	5.52507e-05	0	1.59299e-05	6.73265e-05	0.000475568	0	7.92318e-05	0.000490123	4.62328e-05	0	0	1.44333e-05	0.000115683	0.000352532	0.000144236	0.00577442	0.000490966
Bacteroides_salyersiae	0	4.06725e-05	4.01005e-05	0.000633499	0	0	0.00455601	0	2.8099e-05	0	1.40258e-05	0	0	1.79093e-05	0.00241964	0	0	0.00035602	0	1.67935e-05	0	0	2.71854e-05	0	0	0	7.20721e-05	0	0	1.36578e-05	0	0	5.52507e-05	0	0	0.000252474	0	0	9.50781e-05	0	1.54109e-05	1.53424e-05	1.64341e-05	1.44333e-05	0	5.87553e-05	0.000100965	8.66163e-05	0.00774324
Bacteroides_sp._DSM_12148	0.000186142	1.35575e-05	1.33668e-05	0.000225244	0	5.68521e-05	0	0	7.02474e-05	0.000140229	0	0.000363012	1.38311e-05	5.37278e-05	0.000601332	1.64198e-05	0	4.45025e-05	0	0	0	0.000129147	0	0.000218639	0	0	0.000259459	1.36351e-05	0	0.000218525	0	0	3.68338e-05	0	0	1.68316e-05	0.000713352	0	3.16927e-05	2.7229e-05	1.54109e-05	0	3.28682e-05	0	0	4.40665e-05	0.000245201	1.44361e-05	0.000336663
Bacteroides_sp._Marseille_P3166	0	0	0	0	0	0	1.49869e-05	1.45866e-05	0	0	0	0	0	0	0	0	0	0	0	0	0	0	0	0	0	0	0	0	0	2.73157e-05	0	0	3.68338e-05	1.66931e-05	3.18598e-05	0.000134653	2.9723e-05	0	1.58464e-05	0	0	0	0	0	3.85609e-05	1.46888e-05	0	1.44361e-05	0
Bacteroides_stercoris	0.00260598	0.0029962	0.00199166	0.00843258	0.000298864	0.00264362	0.0221956	0.0171684	0.0701912	0.0132236	0.0361306	0.000251316	0.0339968	0.000197002	0.000114539	0.000131359	1.72052e-05	0.000326351	0.016751	0.000100761	0.000162648	0.0707152	4.0778e-05	0.00696912	4.05932e-05	1.50435e-05	0.00122523	0.00777202	0.000110389	0.0261001	0.000172396	0.000264818	0.00740359	0.000584258	0.000270808	0.00678314	0.00029723	6.65398e-05	0.0539568	0	0.000261986	0.000306847	0.000115039	0.0003031	0.000347048	0.0591372	0.00810604	0.000173233	0.0225424
Bifidobacterium_longum	0.00017063	0.00454176	0.0023392	7.03888e-05	1.35847e-05	0.000227408	2.99738e-05	0.00264018	0.000421484	4.20687e-05	0.000911679	0.000586404	0.00355458	0.000394004	0.000987902	3.28396e-05	1.72052e-05	5.93366e-05	0.00175213	0	0.013676	5.73987e-05	0.00180783	4.09948e-05	0.00426229	0.000451304	0.000547748	0.000122716	0.0109128	0.000983365	0.000660853	1.55775e-05	0.000349921	8.34655e-05	0	0.000168316	1.48615e-05	0.0343612	0.000570469	0.000190603	6.16437e-05	0.000383559	0	4.33e-05	5.78414e-05	0.000470042	0	7.21803e-05	0.00447481
Butyricimonas_virosa	0.00124094	1.35575e-05	6.68342e-05	0.000267478	1.35847e-05	0.000895421	0.000134882	0	0.00285204	4.20687e-05	5.61033e-05	0.00062829	0	0.000161183	0	1.64198e-05	0	7.41708e-05	0	1.67935e-05	1.3554e-05	0.00156411	1.35927e-05	1.36649e-05	1.35311e-05	0	0.000374775	0.000340878	0	0.00031413	0	0	0.000165752	1.66931e-05	3.18598e-05	8.41581e-05	0.000817382	0	0.000412005	0.000980245	4.62328e-05	3.06847e-05	0	0.0001299	0.00183164	0.00233552	0.000389436	0	0.000504994
Butyrivibrio_crossotus	1.55118e-05	0	0	0.00763015	6.79237e-05	1.4213e-05	0	2.91732e-05	0	1.40229e-05	1.40258e-05	0	0	0	0	0	0	0	0	0	0	0	1.35927e-05	2.73299e-05	4.05932e-05	0	0	0	0	0	0	0	0	0	0	0	0.000609321	0	0	0	0.000878423	0	0	4.33e-05	5.78414e-05	1.46888e-05	0	0	0
Campylobacter_hominis	0	0	0	0	0	0	0	0	0	0	0	0	4.14932e-05	0	0	0	0	0	0	0	0	0	1.35927e-05	0	0	0	1.44144e-05	0	0	0	0	0	0	0	0	0	0	0	0	0.0104696	0	0	0	0	0	0	0	0	0
Clostridiaceae_bacterium_DJF_VR76	0.00162874	0.00132863	2.67337e-05	0.0354197	2.71695e-05	2.8426e-05	2.99738e-05	0	2.8099e-05	1.40229e-05	1.40258e-05	0.00892172	4.14932e-05	0	0	1.64198e-05	0	0	0	0	0	0.000631386	0	4.09948e-05	1.35311e-05	0	0	0	0	0	1.43664e-05	0	0	0	0	3.36632e-05	2.9723e-05	1.3308e-05	1.58464e-05	8.16871e-05	1.54109e-05	3.06847e-05	1.64341e-05	0.00993014	0.000385609	0.00273212	0.0269288	7.21803e-05	0
Clostridium_tyrobutyricum	0.00245087	0.000230477	6.68342e-05	0	0.0012498	0.000639586	1.49869e-05	1.45866e-05	1.40495e-05	1.40229e-05	2.80517e-05	1.3962e-05	0	0.0032774	0	0.00523792	0.00409484	0.000237346	0.00318707	0.00480293	0.00013554	0.00106188	1.35927e-05	0.000382618	9.47175e-05	0.00344496	0.000230631	4.09054e-05	0.00357976	1.36578e-05	0.00271524	0.00330244	5.52507e-05	0.00375595	0.00399841	3.36632e-05	0.00150101	3.99239e-05	6.33854e-05	2.7229e-05	0.00274315	0.000598352	0.00456869	0.00137117	0.000134963	4.40665e-05	0	0	0.00064527
Colidextribacter_massiliensis	1.55118e-05	0.000528742	1.33668e-05	0.000351944	1.35847e-05	0.000838568	0	0	0	0	0	0.00115885	0	0.000125365	0.000415205	0	0	0.000296683	0	0	0	0	0	0	1.35311e-05	0	0.000936937	0	0	0.00105165	0	0	0.000607757	0	1.59299e-05	0.00143069	0.000118892	0	0	0	0	0	0	0	0	0	0	0	0
Corynebacterium_stationis	0.000155118	0	2.67337e-05	0	9.50932e-05	4.26391e-05	0	0	2.8099e-05	1.40229e-05	0	0	1.38311e-05	0.000214911	0	0.000197038	0.000395719	0	0.000302092	0.000184728	5.4216e-05	7.17484e-05	1.35927e-05	1.36649e-05	0	9.02609e-05	0	0	0.000205009	0	0.000172396	0.000218086	3.68338e-05	0.000233703	0.000254879	3.36632e-05	8.91689e-05	0	3.16927e-05	0	0.000215753	6.13695e-05	0.000312248	8.66001e-05	7.71218e-05	0	1.44236e-05	0	4.20828e-05
Desulfovibrio_piger	0.00107032	1.35575e-05	0	0.00837627	4.07542e-05	0	0	1.45866e-05	0	0	0	0	1.38311e-05	3.58185e-05	0	1.64198e-05	0	0	0	3.35869e-05	1.3554e-05	0	1.35927e-05	0.00732441	5.41243e-05	6.01739e-05	4.32432e-05	1.36351e-05	3.15398e-05	2.73157e-05	2.87327e-05	0.00112158	0	1.66931e-05	1.59299e-05	1.68316e-05	0.000713352	1.3308e-05	0	2.7229e-05	0	1.53424e-05	1.64341e-05	4.33e-05	1.92805e-05	1.46888e-05	0.00174525	1.44361e-05	0
Dialister_invisus	0	0	8.0201e-05	2.81555e-05	1.35847e-05	2.8426e-05	5.99475e-05	0.0330095	0.0464897	8.41373e-05	0	1.3962e-05	0	0	0	0	1.72052e-05	4.45025e-05	0	3.35869e-05	0.0522235	7.17484e-05	0.000135927	0.000109319	0.0546249	7.52174e-05	2.88288e-05	0	0	0	1.43664e-05	3.11551e-05	0.000221003	6.67724e-05	9.55795e-05	0.000117821	0.000118892	0	0.000285234	0.000108916	0	1.53424e-05	0	4.33e-05	0.000462731	5.87553e-05	2.88471e-05	2.88721e-05	2.80552e-05
Dialister_massiliensis	0.00645291	0.000257592	0.00080201	1.40778e-05	0.000203771	1.4213e-05	5.99475e-05	0.000102106	0.000168594	0.000238389	0.000238439	0.000460746	0.0477034	0.00506832	0.0990765	0.000164198	0	0.000148342	0.00416887	0.000218315	4.0662e-05	0.000114797	0.0358983	0.000163979	0.00012178	6.01739e-05	7.20721e-05	0.0307881	9.46193e-05	0.000587287	0.00047409	0.000358283	0.00058934	0.00494116	1.59299e-05	0.000252474	0.000193199	0.000173003	0.00034862	0.00829124	0.000261986	0.00052164	0	0.000115467	9.64023e-05	0.000102822	0.00020193	0.000158797	0.00288969
Dialister_propionicifaciens	4.65354e-05	0	1.33668e-05	0	0	0	0	0	1.40495e-05	0	2.80517e-05	0	0	0	0	0	0	0	0	0	0.000230418	0	0	0	0	0	0	0	0	0	0	0	3.68338e-05	0	0	0	0	0	0	0.000762413	0	7.67118e-05	0	0	5.78414e-05	0	8.65414e-05	1.44361e-05	0
Dialister_succinatiphilus	0	0.0309382	0.000708442	0.0576907	0.000421127	0.0313681	0	1.45866e-05	7.02474e-05	0.000140229	2.80517e-05	0	0	0.000143274	8.59045e-05	3.28396e-05	8.60259e-05	0.000118673	0	5.03804e-05	5.4216e-05	0.0149954	2.71854e-05	0.000122984	9.47175e-05	3.0087e-05	0.0377225	0	0	0	1.43664e-05	0	0.0149913	0	0	1.68316e-05	0.0621656	2.66159e-05	6.33854e-05	4.08436e-05	0.00881505	0.000398901	0.000115039	0.000187634	0.000250646	0	5.76942e-05	5.77442e-05	2.80552e-05
Dorea_formicigenerans	0.000279213	0.00298265	0.000775277	0.00145001	9.50932e-05	0.00345377	0.000779318	0.00099189	0.000505781	0.000182298	0.00203375	0.00090753	0.00117564	0.000125365	0.00380843	3.28396e-05	3.44104e-05	0.00292233	0.000271883	0	0	0.00177936	0.0011146	0.000778901	2.70621e-05	0.000195565	0.000634234	0.000968094	3.15398e-05	0.0021716	1.43664e-05	0.000311551	0.000773509	0.000116852	6.37196e-05	0.000925739	0.0018131	1.3308e-05	0.00069724	0.00110278	0.000446917	0.00032219	0	0.0002165	0.00086762	0.00164515	0.00125485	0.000721803	0.00157109
Eubacterium_ramulus	0.000232677	0.000393167	0.000922312	0.000351944	0	0.000113704	0.000119895	0.000160453	0.000660326	0.000210343	0.00521761	0.000237354	0.000414932	0.000322367	0.000114539	1.64198e-05	1.72052e-05	0.000326351	0.000438033	0	0.001003	0.000904029	0.00035341	0.00192676	8.11864e-05	9.02609e-05	0.000893694	0.00324516	0.000205009	9.56049e-05	2.87327e-05	0.000249241	0.00029467	5.00793e-05	4.77897e-05	0.000656433	0.000326953	3.99239e-05	7.92318e-05	0.00027229	0.000123287	0.00026082	0	0.000418567	0.000231365	0.000675686	0.000432707	0.000303157	0.00117832
Fructilactobacillus_sanfranciscensis	0.00127197	0.000230477	9.35679e-05	0	0.000978101	0.00061116	0	0	0	2.80458e-05	0	0	0	0.00175511	0	0.00226594	0.00190978	0.000163176	0.00167661	0.00201521	0.000108432	0.000961428	1.35927e-05	0.000218639	5.41243e-05	0.00198574	0.000273874	1.36351e-05	0.00176623	0	0.00186763	0.00190046	0.00088401	0.0021701	0.00211868	0.000605938	0.00118892	0	0.000412005	4.08436e-05	0.00151027	0.00084383	0.00262946	0.000635067	0.00084834	2.93776e-05	1.44236e-05	0	0.000448883
Furfurilactobacillus_rossiae	0.00234228	0.00032538	2.67337e-05	5.63111e-05	0.00164375	0.000994912	4.49607e-05	1.45866e-05	1.40495e-05	0	0	0	1.38311e-05	0.00293712	1.43174e-05	0.00369446	0.00380235	0.000415356	0.00299071	0.00377853	0.000257526	0.00136322	2.71854e-05	0.000560262	8.11864e-05	0.00297861	0.000533333	1.36351e-05	0.00272819	1.36578e-05	0.00295947	0.00286627	0.00213636	0.00310492	0.00360016	0.00161584	0.00167935	1.3308e-05	0.00134694	5.44581e-05	0.00272774	0.00190245	0.00396062	0.00174643	0.00250646	0	1.44236e-05	0	0.00093985
Furfurilactobacillus_siliginis	0.00034126	5.42299e-05	1.33668e-05	2.81555e-05	0.000230941	2.8426e-05	0	0	0	0	0	0	0	0.000304458	0	0.000443335	0.000516156	7.41708e-05	0.000271883	0.000352663	5.4216e-05	0.000114797	0	4.09948e-05	1.35311e-05	0.000225652	0.000100901	0	0.000346937	1.36578e-05	0.000359159	0.000405016	0.000423588	0.000600952	0.000350458	0.000370296	0.00010403	1.3308e-05	0.000316927	0	0.000339041	0.000306847	0.00055876	0.0002598	0.000539853	0	0	0	0.000140276
Fusobacterium_mortiferum	0	0	2.67337e-05	0	0	0	1.49869e-05	0	2.8099e-05	1.40229e-05	0	1.3962e-05	0	0	1.43174e-05	1.64198e-05	0	1.48342e-05	0	0	0	0	0	1.36649e-05	0	0	2.88288e-05	0	1.57699e-05	1.36578e-05	1.43664e-05	1.55775e-05	0.00029467	0	4.77897e-05	0	0	0	3.16927e-05	0.00324026	0	7.67118e-05	0	0	0.000192805	0	1.44236e-05	0	0
Gardnerella_vaginalis	0.00119441	0.00016269	0.000120302	1.40778e-05	0.000298864	0.00046903	4.49607e-05	8.75197e-05	0	5.60915e-05	5.61033e-05	1.3962e-05	0	0.000394004	5.72697e-05	3.28396e-05	3.44104e-05	0.000385688	0.000921381	1.67935e-05	0.00020331	0.000746183	8.15561e-05	0.000245969	0.00025709	0.000917652	0.00273874	6.81756e-05	0.00105658	6.82892e-05	0.00169523	0.000654257	0.0552691	0.000367248	0.000764636	0.0404127	0.000535014	2.66159e-05	0.0225494	8.16871e-05	0.00188013	0.0136854	0	0.00200624	0.0604249	2.93776e-05	5.76942e-05	0	0.000519021
Gluconobacter_oxydans	0.00108583	6.77874e-05	4.01005e-05	0	0.000611313	0.000241621	0	2.91732e-05	0	4.20687e-05	4.20775e-05	2.7924e-05	0	0.00164765	4.29523e-05	0.00239729	0.00187537	0.000163176	0.00120837	0.00194804	0.000108432	0.000416141	1.35927e-05	0.000177644	6.76553e-05	0.00124861	0.000230631	1.36351e-05	0.00127736	0	0.000890715	0.00133967	0.00101293	0.00185293	0.00199124	0.00062277	0.000535014	2.66159e-05	0.000475391	1.36145e-05	0.00137157	0.000935884	0.00188992	0.000721667	0.00104114	4.40665e-05	1.44236e-05	4.33082e-05	0.00029458
Izhakiella_australiensis	0.000294724	0	0	0	0	4.26391e-05	0	1.45866e-05	0	0	0	0	0	0.00025073	0	0.000525434	0.000378514	0	0.000271883	0.000235108	2.7108e-05	8.6098e-05	1.35927e-05	1.36649e-05	0	0.000270783	2.88288e-05	0	0.000268088	0	0.000129297	0.000264818	0	0.000300476	0.000334528	1.68316e-05	0.000222922	2.66159e-05	1.58464e-05	0	0.000215753	0.000107397	0.000312248	0.000144333	1.92805e-05	0	0	0	2.80552e-05
Lachnospiraceae_bacterium_GAM79	0.000124094	0.00319957	0.000601508	0.0192865	5.4339e-05	0.00572785	0.00281753	0.00618472	0.0121528	0.000659076	4.20775e-05	0.00302975	0.000428763	0.00257894	0.0114253	4.92595e-05	1.72052e-05	0.0018246	0.000226569	1.67935e-05	0.00027108	0.0086098	0.0153869	0.00112052	0.00182669	1.50435e-05	0.00151351	0.000190892	9.46193e-05	0.00585921	5.74655e-05	0.00473557	0.000663008	0.000100159	0.000238949	0.000908907	0.0031655	1.3308e-05	0.000190156	0.000789642	0.00562499	0.000107397	1.64341e-05	0.00152993	0.000308487	0.00442133	0.00142793	0.00498044	0
Lachnospiraceae_bacterium_TF01_11	0.000449843	0.000176247	0	0.000591266	0	0.00126496	0.000749344	0	0	0.000168275	0	0.000935454	8.29864e-05	0	0	0	0	5.93366e-05	0.000241674	0	5.4216e-05	0.000373091	0.000312632	0	0	0	0	0	0	0.000109263	0	0	3.68338e-05	0	0	0.000218811	0.000118892	0	3.16927e-05	9.53016e-05	0	0	0	0.000144333	0	0.000235021	0.000894261	1.44361e-05	0
Lacticaseibacillus_pantheris	0.000279213	5.42299e-05	0	0	0.000298864	0.000127917	0	0	0	0	0	0	0	0.00025073	0	0.000377656	0.000344104	2.96683e-05	0.000151046	0.000235108	4.0662e-05	0.000129147	1.35927e-05	2.73299e-05	2.70621e-05	0.000421217	0.000100901	2.72702e-05	0.000283858	1.36578e-05	0.000229862	0.000280396	0.000552507	0.000166931	0.000286738	0.000336632	0.000163476	0	0.000301081	0	0.000246575	0.000306847	0.000377985	0.0001732	0.000520572	0	0	0	8.41656e-05
Lactobacillus_iners	0.000465354	0.00010846	6.68342e-05	5.63111e-05	0.000203771	0.000227408	4.49607e-05	2.91732e-05	0	0	0	2.7924e-05	1.38311e-05	8.95464e-05	1.43174e-05	1.64198e-05	0	0.000281849	0.00019636	5.03804e-05	0.00027108	0.00045919	0	0.000109319	0.000175904	0.000225652	0.00161441	2.72702e-05	0.000236548	0	0.000847616	0.000280396	0.0175329	0.000116852	0.000446037	0.0199118	0.000520152	1.3308e-05	0.00950781	1.36145e-05	0.000647259	0.0048175	1.64341e-05	0.00140003	0.0209193	1.46888e-05	0	2.88721e-05	0.000364718
Lactobacillus_sp._TS3	0.000186142	4.06725e-05	0	0	0.000176602	0.000113704	0	0	0	0	0	0	0	5.37278e-05	0	0.000229878	0.000326899	2.96683e-05	0.000302092	0.000167935	1.3554e-05	0.000100448	0	1.36649e-05	1.35311e-05	0.000255739	0	0	0.000220778	0	0.000215496	0.000218086	0	0.000250396	0.000302668	0	0.000208061	5.32318e-05	0	0	0.000138698	4.60271e-05	0.000328682	0.0001732	0	0	0	0	4.20828e-05
Lactococcus_hircilactis	0	1.35575e-05	0	1.40778e-05	0	1.4213e-05	0	0	0	0	0	0	0	3.58185e-05	0	4.92595e-05	6.88208e-05	0	3.02092e-05	3.35869e-05	0	1.43497e-05	0	1.36649e-05	0	4.51304e-05	1.44144e-05	0	4.73097e-05	0	4.30991e-05	4.67326e-05	5.52507e-05	1.66931e-05	7.96495e-05	5.04948e-05	5.9446e-05	0	7.92318e-05	0	6.16437e-05	3.06847e-05	4.93024e-05	1.44333e-05	7.71218e-05	1.46888e-05	0	0	0
Lentilactobacillus_parafarraginis	0.000496378	5.42299e-05	0	1.40778e-05	0.000312449	0.000255834	1.49869e-05	0	0	0	0	1.3962e-05	0	0.000591006	0	0.000574694	0.000688208	4.45025e-05	0.000513556	0.000587771	2.7108e-05	0.000272644	2.71854e-05	4.09948e-05	2.70621e-05	0.000466348	7.20721e-05	4.09054e-05	0.000725415	0	0.000430991	0.000545214	0.000257836	0.000717803	0.000700916	0.000117821	0.000222922	0	7.92318e-05	0	0.000431506	0.000306847	0.000690233	0.000331967	0.000134963	0	0	0	0.000112221
Lentimicrobium_saccharophilum	3.10236e-05	1.35575e-05	1.33668e-05	2.81555e-05	0.000203771	2.8426e-05	0	0	0	0	0	1.3962e-05	0	0.000465641	0	0.00142852	0.00135921	2.96683e-05	4.53138e-05	0.0012763	1.3554e-05	0	0	4.09948e-05	0	1.50435e-05	0	0	3.15398e-05	0	1.43664e-05	0	0	0.00108505	1.59299e-05	1.68316e-05	5.9446e-05	0	0	0	3.08219e-05	0	0.00156124	7.21667e-05	7.71218e-05	0	0	0	0
Leuconostoc_carnosum	0.000186142	2.7115e-05	0	1.40778e-05	0.000135847	5.68521e-05	0	0	0	0	0	0	0	7.16371e-05	0	0.000213458	0.000275283	4.45025e-05	0.000256778	0.000251902	1.3554e-05	0.000129147	0	4.09948e-05	1.35311e-05	0.000195565	4.32432e-05	0	0.000378477	2.73157e-05	0.000172396	9.34652e-05	0.000257836	0.000133545	0.000159299	0.000252474	0.000178338	0	0.000237695	0	0.000184931	0.000245478	0.000295814	0.000115467	0.000385609	0	0	0	4.20828e-05
Ligilactobacillus_acidipiscis	0.000403307	6.77874e-05	0	0	0.000244525	0.000113704	0	0	0	0	0	0	0	0.00048355	0	0.000788151	0.00049895	2.96683e-05	0.000453138	0.000772499	8.1324e-05	0.000243944	0	0.000163979	6.76553e-05	0.000571652	0.000100901	1.36351e-05	0.000756955	0	0.00047409	0.000514059	7.36675e-05	0.000600952	0.000653126	3.36632e-05	0.000252645	0	3.16927e-05	1.36145e-05	0.000570205	0.000214793	0.000788838	0.000317534	7.71218e-05	0	0	1.44361e-05	0.000154304
Ligilactobacillus_salivarius	0.000108583	1.35575e-05	2.67337e-05	0	1.35847e-05	0.000298474	0	4.37598e-05	2.8099e-05	2.80458e-05	5.61033e-05	0	1.38311e-05	3.58185e-05	0	1.64198e-05	0.000103231	0.000370854	1.51046e-05	3.35869e-05	0.000257526	2.86993e-05	0.00145442	1.36649e-05	0	0.000120348	2.88288e-05	0.000122716	4.73097e-05	0.0295965	8.61982e-05	4.67326e-05	0.000165752	1.66931e-05	3.18598e-05	0.000117821	5.9446e-05	0.000266159	7.92318e-05	1.36145e-05	7.70547e-05	6.13695e-05	4.93024e-05	2.88667e-05	0.000192805	0	1.44236e-05	0.000115488	4.20828e-05
Limosilactobacillus_mucosae	3.10236e-05	1.35575e-05	0.000147035	0	0.000108678	4.26391e-05	0	0.00013128	0	1.40229e-05	1.40258e-05	1.3962e-05	0	3.58185e-05	0.000100222	4.92595e-05	0	0.000370854	0.000105732	1.67935e-05	1.3554e-05	2.86993e-05	0	6.83247e-05	0	0.000526522	1.44144e-05	1.36351e-05	3.15398e-05	0.0017482	1.43664e-05	3.11551e-05	0.000147335	1.66931e-05	6.37196e-05	5.04948e-05	7.43075e-05	0.000119772	6.33854e-05	0	9.24656e-05	7.67118e-05	1.64341e-05	0	0.000134963	1.46888e-05	0	1.44361e-05	1.40276e-05
Limosilactobacillus_pontis	0.00280764	0.000447397	8.0201e-05	5.63111e-05	0.0021328	0.00112283	2.99738e-05	1.45866e-05	2.8099e-05	0	0	0	4.14932e-05	0.00474596	1.43174e-05	0.00463039	0.00426689	0.000563698	0.00342874	0.00441668	0.00033885	0.00185111	1.35927e-05	0.000519268	0.000243559	0.00388122	0.000590991	2.72702e-05	0.00387939	0.000204868	0.0034623	0.00344264	0.0013076	0.00415658	0.00414178	0.000504948	0.00227381	2.66159e-05	0.000665547	2.7229e-05	0.00308219	0.00116602	0.00470016	0.00215057	0.000906181	1.46888e-05	0	2.88721e-05	0.00105207
Limosilactobacillus_vaginalis	0.00145811	0.000677874	0.00303427	0	0.000692822	0.00028426	5.99475e-05	0.000160453	2.8099e-05	0	0.000645188	0.000432822	0.000539412	0.00127156	0.000658601	0.00121507	0.000963491	0.000578532	0.000709916	0.00107478	4.0662e-05	0.00045919	0.000462151	0.000560262	0.000324746	0.00100791	0.00049009	0.000122716	0.00123005	0.000450709	0.00094818	0.000607524	0.000331504	0.000984893	0.000908005	0.000319801	0.000668767	5.32318e-05	9.50781e-05	1.36145e-05	0.00188013	0.00131944	0.000854574	0.000245367	0.000347048	7.34441e-05	2.88471e-05	2.88721e-05	0.000252497
Megamonas_funiformis	0.000356772	0.000637202	0.0671817	5.63111e-05	0	0	0	0	0	1.40229e-05	0.000182336	0.000125658	0.000165973	0	0.000243396	4.92595e-05	0	0.000415356	3.02092e-05	0	9.48779e-05	0	1.35927e-05	4.09948e-05	1.35311e-05	1.50435e-05	1.44144e-05	5.45405e-05	1.57699e-05	1.36578e-05	0	0	1.84169e-05	0	0	1.68316e-05	0	2.66159e-05	1.58464e-05	0	0.00334417	0.0591448	0	4.33e-05	1.92805e-05	0	0	0	0
Megasphaera_micronuciformis	0	0	0	0	2.71695e-05	0	0	0	0	0	2.80517e-05	0	0	0	0	0	0	1.48342e-05	3.02092e-05	3.35869e-05	0	1.43497e-05	2.71854e-05	0	0	0	0	0	0	1.36578e-05	0	0	0	0	0	1.68316e-05	0	0.000212927	0	0	0	0	0	0	0	0	0	2.88721e-05	0
Monoglobus_pectinilyticus	0	0	0	0	0	0	0.000104908	0.000291732	0	0.00138827	0	0	0	0	0	0	0	1.48342e-05	0	0	0	0	0	1.36649e-05	2.70621e-05	0	0	0	0	0.00050534	0	0	0	0	0	1.68316e-05	0	0	1.58464e-05	0	0	0	0	0.0003031	1.92805e-05	0	0.000115388	0.000303157	0
Odoribacter_splanchnicus	0.00139606	0.00032538	0.000133668	0.00237914	1.35847e-05	0.000895421	0.000644436	2.91732e-05	0.00434129	2.80458e-05	9.81808e-05	0.000586404	0.0046749	1.79093e-05	0.00498246	1.64198e-05	1.72052e-05	0.000445025	0	1.67935e-05	0	0.00348697	0.00252824	0.00504236	0.00177257	1.50435e-05	0.000446847	0.000299973	1.57699e-05	0.000437051	2.87327e-05	0.000295973	0.00162069	1.66931e-05	7.96495e-05	0.00171682	0.000817382	0	0.000507083	0.0034717	7.70547e-05	0	0	4.33e-05	0.000539853	0.000572864	0.000764449	0.00177563	0.00116429
Oscillibacter_sp._PEA192	7.75591e-05	6.77874e-05	0	0.000225244	0	1.4213e-05	0.000179843	0.000466772	0.0026975	0.000560915	4.20775e-05	2.7924e-05	0.000954344	7.16371e-05	0.000572697	0	0	2.96683e-05	0	0	2.7108e-05	5.73987e-05	0.000190298	0.00203608	0.00174551	0	0.00012973	0.000968094	3.15398e-05	0.000122921	1.43664e-05	0.000171353	1.84169e-05	1.66931e-05	1.59299e-05	6.73265e-05	8.91689e-05	1.3308e-05	0.000396159	0.00148398	0	0	0	5.77334e-05	0.000173524	0.00161577	0.000173083	0.000332029	0.00064527
Oxalobacter_formigenes	0	0	1.33668e-05	0.000661655	0	0.000895421	8.99213e-05	1.45866e-05	0.000505781	0.000434709	0	0.000181506	0.000304283	1.79093e-05	0	0	0	7.41708e-05	0	1.67935e-05	0	0.000186546	0	0.000327958	1.35311e-05	0	0.000201802	0	0	0.00117457	0	0	0	0	0	1.68316e-05	0.000252645	0	0.000538776	0	0	0	0	0	0	0	1.44236e-05	0	1.40276e-05
Parabacteroides_chongii	1.55118e-05	0	1.33668e-05	0.000183011	0	0	0	0	0	0.00124804	0	9.7734e-05	0	0	0.000429523	1.64198e-05	0	0	0	0	1.3554e-05	0	0	0	0	4.51304e-05	0.000273874	0	1.57699e-05	1.36578e-05	1.43664e-05	0.000451749	0	0	1.59299e-05	0	0.00069849	0	0	0.000653497	1.54109e-05	0	0	2.88667e-05	0	0	5.76942e-05	0	0
Parabacteroides_goldsteinii	0.000108583	8.13449e-05	0.000120302	0.00118253	4.07542e-05	1.4213e-05	0.000569502	1.45866e-05	0.0028099	0.000462755	0.00136051	0.000502632	0	1.79093e-05	0.000730188	4.92595e-05	5.16156e-05	0.000148342	3.02092e-05	0.000117554	1.3554e-05	0.00397486	4.0778e-05	0.00825362	2.70621e-05	0	0.00410811	9.54459e-05	1.57699e-05	1.36578e-05	4.30991e-05	0.000373861	0.000239419	3.33862e-05	0.000191159	0.00010099	0.00112947	1.3308e-05	7.92318e-05	0.0192373	0.000215753	9.20542e-05	3.28682e-05	4.33e-05	0.00086762	7.34441e-05	5.76942e-05	0.00209323	4.20828e-05
Parabacteroides_gordonii	4.65354e-05	0	0	0	0	0	2.99738e-05	0	0	0.000392641	1.40258e-05	0	0.000152142	0	0	0	0	0	0	0	1.3554e-05	0	0	8.19896e-05	0	0	0.000691892	1.36351e-05	0	0	0	1.55775e-05	0	1.66931e-05	0	0.00111089	8.91689e-05	0	0	0.00417966	0.000231164	0	1.64341e-05	1.44333e-05	0.000154244	0.00036722	1.44236e-05	0	5.61104e-05
Parabacteroides_johnsonii	0.000186142	0	4.01005e-05	0	0	2.8426e-05	0	0	0	0	0	0	0.00615482	1.79093e-05	0	4.92595e-05	3.44104e-05	0	0	3.35869e-05	0	0	0	4.09948e-05	1.35311e-05	1.50435e-05	1.44144e-05	0	3.15398e-05	0	0	0	1.84169e-05	3.33862e-05	1.59299e-05	0	0	0	0	0	1.54109e-05	0	6.57365e-05	1.44333e-05	0	0	0	0	0
Parabacteroides_merdae	0.00269906	0.00585683	0.00132332	0.000492722	0.000135847	0.00231672	0.00810791	0.0151701	0.000140495	0.000168275	0.00813498	0.000879606	4.14932e-05	0.000411913	0.0138306	0.000131359	1.72052e-05	0.00342669	0.00814138	0.000167935	2.7108e-05	0.01026	9.51488e-05	0.00586226	0.0360062	0.000165478	0.00168649	0.000968094	4.73097e-05	0.00162528	2.87327e-05	0.00101254	0.00160227	0.000150238	0.000541617	0.00705245	0.00964511	5.32318e-05	0.00502329	0.00409797	0.00251198	0.000184108	6.57365e-05	0.00310317	0.00669032	0.00781445	0.014539	0.0316005	0.00678936
Parabacteroides_sp.	0	0	0	0	0	1.4213e-05	0	0	0	0.00180895	0	0	0.00255875	0	1.43174e-05	0	0	0	0	0	0	0	0	0	0	0	0	0	0	0	0	0	0	0	0	0	0	0	0	0	0	0	0	0	0	0	0	0	0
Paracoccus_alcaliphilus	0.000217165	1.35575e-05	8.0201e-05	2.81555e-05	0.000149432	0.000127917	0	0	0	0	1.40258e-05	0	0	0.000340276	2.86348e-05	0.000344816	0.000395719	1.48342e-05	0.000302092	0.000319076	0	0.000114797	1.35927e-05	0	1.35311e-05	0.000225652	1.44144e-05	0	0.000205009	0	0.000100565	0.000233663	0.000184169	0.000333862	0.000350458	6.73265e-05	0.000118892	0	1.58464e-05	0	0.000385273	0.000122739	0.000345117	0.000187634	7.71218e-05	0	0	0	2.80552e-05
Paraprevotella_clara	0.00193898	4.06725e-05	0.000721809	0.000703888	2.71695e-05	0.000170556	0.000959161	0.0198232	0.00906192	0	0.024433	0.0484062	5.53243e-05	3.58185e-05	0.00539767	4.92595e-05	0	0.00133507	3.02092e-05	0	0	2.86993e-05	1.35927e-05	0	1.35311e-05	3.0087e-05	0.000100901	0.0120671	4.73097e-05	0.00893223	2.87327e-05	0.00358283	0.000165752	5.00793e-05	0.000302668	0.00136336	0.00118892	3.99239e-05	0.000554622	2.7229e-05	0.00212671	0.00296108	1.64341e-05	5.77334e-05	0	7.34441e-05	7.21178e-05	8.66163e-05	1.40276e-05
Paraprevotella_xylaniphila	0	0	0	0	0	0	0	0	0	0	0	0	0	0	0	0	0	1.48342e-05	0	0.000117554	0	0	0	0	0	0	0	0	1.57699e-05	0	0	0	0	0	0	0	0	0	0	1.36145e-05	0	0	0	0	0	0	0	0	0
Pediococcus_parvulus	0.00220268	0.000433839	6.68342e-05	9.85444e-05	0.00122263	0.000696438	0	1.45866e-05	1.40495e-05	0	1.40258e-05	1.3962e-05	0	0.00256103	0	0.00279137	0.00256357	0.000445025	0.00237142	0.00235108	0.000365958	0.00110492	2.71854e-05	0.000396283	0.000216497	0.00246713	0.000634234	1.36351e-05	0.0029332	0	0.00249975	0.00222759	0.0031677	0.00258743	0.00226205	0.00213762	0.00163476	1.3308e-05	0.00164802	1.36145e-05	0.00198801	0.00223999	0.00281024	0.00165983	0.00316199	0	0	1.44361e-05	0.000729436
Pedobacter_indicus	0.00034126	4.06725e-05	1.33668e-05	0	0.000203771	8.52781e-05	0	0	0	0	0	0	0	0.000125365	0	0.000574694	0.000516156	1.48342e-05	0.000438033	0.000520597	2.7108e-05	0.000100448	0	6.83247e-05	0	0.000451304	7.20721e-05	0	0.000599256	0	0.000186763	0.000529636	0.000110501	0.000367248	0.000700916	0	0.000118892	0	1.58464e-05	0	0.000570205	0.000107397	0.00055876	0.000288667	0.000115683	0	0	0	4.20828e-05
Phocaeicola_coprophilus	0.000108583	1.35575e-05	4.01005e-05	0	0.000434712	0.00106598	1.49869e-05	1.45866e-05	5.61979e-05	5.60915e-05	4.20775e-05	1.3962e-05	4.14932e-05	0	2.86348e-05	1.64198e-05	0	0.00870765	0	0	0	2.86993e-05	0	0	1.35311e-05	0	0.00116757	0	0	0.000478025	1.43664e-05	3.11551e-05	1.84169e-05	1.66931e-05	1.59299e-05	0.00892076	2.9723e-05	1.3308e-05	0	0	0.0110496	0.00176437	1.64341e-05	0	7.71218e-05	0	0.0222556	1.44361e-05	0
Phocaeicola_massiliensis	0.00856252	0.00432484	0.00117628	0	6.79237e-05	0.002402	0.0269015	0.0191522	0.0183627	0.0260265	2.80517e-05	0.0158608	0.0209679	0.000179093	8.59045e-05	0	0	1.48342e-05	0	0.000218315	5.4216e-05	0.00868155	0.000108741	0.0171632	1.35311e-05	1.50435e-05	1.44144e-05	0.0116989	3.15398e-05	0.00285449	2.87327e-05	0.00344264	0.00088401	3.33862e-05	0.000254879	0.00715344	0.00322494	1.3308e-05	0.0541945	1.36145e-05	0.00016952	4.60271e-05	0.000115039	0.0001299	0.000115683	0.0114132	0.000634637	4.33082e-05	0.011685
Phocaeicola_plebeius	0.017032	0.0572668	0.000534674	0.0515246	0.00028528	0.0228688	0.0102061	0.0328345	0.0198941	0.000224366	0.0365233	8.3772e-05	0.000165973	0.000340276	0.00418069	0.00103445	3.44104e-05	0.00415356	0.000181255	0.000167935	0.000420174	0.00253989	0.000163112	0.0896693	9.47175e-05	0.000962782	0.00230631	0.0107172	9.46193e-05	0.00286815	0.000172396	0.00445518	0.00922686	0.00213672	0.000223019	0.000201979	0.00280882	0.000146388	0.00101417	0.000136145	0.0134692	0.000122739	0.000180775	0.000822701	0.012513	0.110592	0.0892674	0.000274285	0.0415919
Phocaeicola_vulgatus	0.0104394	0.035263	0.0736914	0.0153025	0.000407542	0.00778874	0.0131135	0.0548311	0.0747854	0.0566384	0.0536348	0.064295	0.0472054	0.000770099	0.0128141	0.000558274	0.000516156	0.00495461	0.0200891	0.000789292	0.0825845	0.0540552	0.139366	0.0323312	0.13619	0.0143364	0.00586667	0.0529997	0.0145241	0.00416564	0.010272	0.00380092	0.0141626	0.00519155	0.00173636	0.0232613	0.0333938	0.000439163	0.0230089	0.094934	0.00314383	0.00414244	0.000427287	0.00326194	0.0150966	0.0761615	0.0189093	0.110609	0.0450847
Porphyromonas_asaccharolytica	6.20472e-05	0	0	0	0	0	0	0	4.21484e-05	0	0	0	4.14932e-05	0	0	0	0	0	0	0	1.3554e-05	0	0	0	0.000108249	0	0.000144144	0	0	0	0	0	5.52507e-05	0	9.55795e-05	1.68316e-05	0	0	3.16927e-05	0.00537773	0	3.06847e-05	0	0	9.64023e-05	1.46888e-05	5.76942e-05	1.44361e-05	0
Porphyromonas_bennonis	1.55118e-05	0	0	0	0	0	0	0	1.40495e-05	0	0	0	0	0	0	0	0	1.48342e-05	0	0	0	0	0	0	1.35311e-05	0	0.000115315	0	0	0	0	0	0	0	0	0	0	0	0	0.000762413	0	0	0	0	0	0	0.000346165	2.88721e-05	0
Prevotella_buccae	0	0	0	1.40778e-05	0	0	0	0	0	0	0	0	0	0	0	0	0	0	0	0	1.3554e-05	0	0	1.36649e-05	0	0	0	9.54459e-05	7.88494e-05	0	0	0	0	0	0	0	0	0	0	0	0	0	0	0	0	0	0	1.44361e-05	0
Prevotella_corporis	0.00017063	0	0	0	0	0	0	2.91732e-05	0	0	0	0	0	0	0	0	8.60259e-05	0	1.51046e-05	0	0	0	2.71854e-05	0	0.000148842	0	0.00108108	0	0	4.09735e-05	0	0	0	0	0	0	0	0	0	0.0676505	0	0	0	0	0	0	8.65414e-05	0	0
Prevotella_rara	0	0	0	0	1.35847e-05	0	0	0	1.40495e-05	0	0	0	0	0	1.43174e-05	0	0	0	0	0	0	0	0	0	0	0	0	0	0	0.00415198	0	3.11551e-05	0.00721942	0	0.000573477	3.36632e-05	0	0	1.58464e-05	0	0	0	0	0	0	1.46888e-05	0	0	0
Prevotella_sp._KHD1	0	0	0.000160402	0	0	0	0	1.45866e-05	1.40495e-05	1.40229e-05	0	0	0	0	0	0	0	0	0	0	0	0	1.35927e-05	0	0	0	0	0	0	0.00335983	0	0	0	0	0	1.68316e-05	0.00462192	1.3308e-05	0.00017431	0	0	1.53424e-05	0	0	0	0	0.00248085	1.44361e-05	0
Prevotella_sp._Marseille_P2931	0	0	0	0	0	0	0	0	0	0	0	0	1.38311e-05	0	0	0	0	7.41708e-05	0	0	0	0	4.0778e-05	1.36649e-05	5.41243e-05	6.01739e-05	2.88288e-05	6.81756e-05	6.30795e-05	0	0	0	1.84169e-05	0	0	0	0	0	0	1.36145e-05	0	0	0	0	1.92805e-05	0	0	0	0
Prevotella_stercorea	0	2.7115e-05	4.01005e-05	0	4.07542e-05	0	1.49869e-05	0	0	1.40229e-05	2.80517e-05	5.5848e-05	1.38311e-05	1.79093e-05	0.00134584	0	1.72052e-05	0.00663087	0	0	0	0	1.35927e-05	0	2.70621e-05	4.51304e-05	0	2.72702e-05	0	0.000682892	0	0	1.84169e-05	0	0	0.00129603	0.00141184	3.99239e-05	0	6.80726e-05	0	0	0	0.000447434	9.64023e-05	0	0.00653387	0	0
Prevotellaceae_bacterium_Marseille_P2831	4.65354e-05	0	5.34674e-05	0	2.71695e-05	0	0	0	0	0	0	0	1.38311e-05	0	0	0	0	0	0	0	0	0	0	0	0	0	0	0	0	0	0	0	0	0	0	0	0	0	0	0	0	1.53424e-05	1.64341e-05	0	0	0	0	1.44361e-05	0
Propionibacterium_freudenreichii	0.000232677	0	1.33668e-05	0	4.07542e-05	2.8426e-05	1.49869e-05	0	0	0	0	0	0	7.16371e-05	0	0.000229878	0.000258078	1.48342e-05	0.000241674	0.000352663	5.4216e-05	1.43497e-05	0	0	0	0.000285826	0	0	0.000236548	0	0.00015803	0.00018693	3.68338e-05	0.000116852	0.000366388	3.36632e-05	4.45845e-05	0	1.58464e-05	0	0.000154109	4.60271e-05	0.000361551	8.66001e-05	0	0	0	0	1.40276e-05
Rothia_mucilaginosa	0.000217165	0.000244035	0.000521307	0.000239322	4.07542e-05	0.000127917	0.000104908	2.91732e-05	0.000590078	0	4.20775e-05	6.981e-05	0.000456425	0	0.000959267	1.64198e-05	3.44104e-05	0.000118673	0.000105732	1.67935e-05	0.000216864	0	0.00122334	5.46597e-05	5.41243e-05	0	0.000446847	0.000449959	1.57699e-05	0.00118823	0.000114931	0.00012462	0.00114185	0	1.59299e-05	0.000201979	5.9446e-05	0.000372623	0.000253542	5.44581e-05	0.00342123	7.67118e-05	0	0.0003897	0.000173524	0	0.000346165	5.77442e-05	0
Ruminococcus_bicirculans	9.30709e-05	0.000135575	0.000147035	0.0002534	1.35847e-05	0.00601211	5.99475e-05	2.91732e-05	0.000210742	8.41373e-05	2.80517e-05	0.00981528	0.00125863	3.58185e-05	0.00141742	0	3.44104e-05	4.45025e-05	0.00108753	3.35869e-05	0.00727849	0.000301343	6.79634e-05	0.0113829	0.0269268	7.52174e-05	2.88288e-05	0	0	0.00135213	1.43664e-05	1.55775e-05	5.52507e-05	1.66931e-05	1.59299e-05	0.000807918	4.45845e-05	5.32318e-05	0.00139448	0.000748799	0.000107877	0.000138081	0	5.77334e-05	0.000289207	0.00556706	0.0242316	7.21803e-05	0.00155706
Ruminococcus_callidus	0.00085315	0.00292842	9.35679e-05	2.81555e-05	4.07542e-05	0.00139288	1.49869e-05	0.000102106	2.8099e-05	4.20687e-05	1.40258e-05	0.000921492	0.000899019	7.16371e-05	2.86348e-05	3.28396e-05	0	0.00172076	3.02092e-05	0	0.00513696	0	0.000475744	0.00099754	0.0039646	0	0.000936937	0	0	0.00132481	4.30991e-05	0.000218086	0.000902427	8.34655e-05	3.18598e-05	0.000437622	0.000312091	1.3308e-05	0.00069724	0.000517352	0.000154109	7.67118e-05	0	4.33e-05	1.92805e-05	0.000528797	0.00178852	0.00375337	0.000252497
Ruminococcus_flavefaciens	0	0.000352495	0	0.000591266	0	1.4213e-05	0	0	1.40495e-05	0	0	0	0	0	0	0	0	1.48342e-05	0	1.67935e-05	0	0	0	0	0	0	0	0	0	0.00173455	0	0	1.84169e-05	0	0	1.68316e-05	0.00153073	0	3.16927e-05	0	0	3.06847e-05	0	0	0	0	0	0	1.40276e-05
Saccharopolyspora_rectivirgula	0.000263701	2.7115e-05	0	0	0.000176602	9.94912e-05	0	0	1.40495e-05	2.80458e-05	4.20775e-05	0	0	0.000680552	2.86348e-05	0.000574694	0.000584976	2.96683e-05	0.000483347	0.000587771	2.7108e-05	0.000215245	0	9.56546e-05	1.35311e-05	0.000556609	0.000100901	1.36351e-05	0.000488866	0	0.000272961	0.000514059	0.000626174	0.000417327	0.000493827	0.000302969	0.000312091	2.66159e-05	0.000206003	1.36145e-05	0.000339041	0.000383559	0.000575194	0.0002165	0.000636255	0	0	1.44361e-05	5.61104e-05
Schaalia_odontolytica	3.10236e-05	8.13449e-05	0.000200503	0	0.00025811	0.00014213	1.49869e-05	0.000102106	0.000210742	0	0.000294543	0	0.000414932	1.79093e-05	0.000214761	0	0	5.93366e-05	0	0	0.00033885	2.86993e-05	0.000108741	4.09948e-05	4.05932e-05	0	4.32432e-05	0.000204527	0	0.00019121	0.000100565	0	9.20844e-05	3.33862e-05	1.59299e-05	5.04948e-05	2.9723e-05	0.000226235	3.16927e-05	0.000340363	6.16437e-05	4.60271e-05	0	0.000115467	7.71218e-05	5.87553e-05	8.65414e-05	2.88721e-05	8.41656e-05
Serratia_ficaria	0.00203205	0.00021692	4.01005e-05	2.81555e-05	0.000217356	0.000554308	1.49869e-05	2.91732e-05	0	2.80458e-05	1.40258e-05	0	0	0.00342067	0	0.00288989	0.00325178	0.000148342	0.00220527	0.00401364	0.000189756	0.000817931	5.43707e-05	0.000204974	0.000135311	0.00243704	0.000288288	0	0.00299628	4.09735e-05	0.00117804	0.00266376	0.000184169	0.00327185	0.003409	0.000168316	0.00114433	0	0.000110924	2.7229e-05	0.00220376	0.00084383	0.0034183	0.00161653	0.000192805	1.46888e-05	1.44236e-05	2.88721e-05	0.000140276
Solobacterium_moorei	1.55118e-05	5.42299e-05	6.68342e-05	1.40778e-05	9.50932e-05	0.000227408	2.99738e-05	2.91732e-05	0.000126445	0	0	6.981e-05	2.76621e-05	0	1.43174e-05	1.64198e-05	0	1.48342e-05	0	0	0.000162648	7.17484e-05	2.71854e-05	1.36649e-05	4.05932e-05	0	4.32432e-05	0.000163621	0	6.82892e-05	1.43664e-05	0	9.20844e-05	1.66931e-05	0	0	7.43075e-05	2.66159e-05	3.16927e-05	0	0	4.60271e-05	0	0.000101033	0	2.93776e-05	4.32707e-05	4.33082e-05	0
Sphingobacterium_sp._21	0.000403307	2.7115e-05	1.33668e-05	0	8.15084e-05	4.26391e-05	0	0	0	0	0	0	0	0.000179093	0	0.000558274	0.000722618	4.45025e-05	0.000407824	0.000722119	5.4216e-05	0.000114797	1.35927e-05	2.73299e-05	1.35311e-05	0.000616783	0.000100901	0	0.000394247	0	0.000373526	0.000482904	0.000681425	0.000651031	0.000796495	0.000336632	0.000163476	0	0.000253542	0	0.000508561	0.000567668	0.00083814	0.0003464	0.000674816	0	0	0	0.000140276
Spirosoma_oryzae	0.000248189	0	0	0	6.79237e-05	0.000170556	1.49869e-05	0	0	0	0	0	1.38311e-05	0.000214911	1.43174e-05	0.000426915	0.000378514	1.48342e-05	0.000226569	0.00038625	2.7108e-05	2.86993e-05	0	4.09948e-05	0	0.000376087	0.00012973	1.36351e-05	0.000283858	0	0.000244228	0.000451749	0.000368338	0.000367248	0.000589407	0.000117821	8.91689e-05	0	4.75391e-05	0	9.24656e-05	0.000291505	0.000295814	0.000144333	0.000385609	0	0	0	2.80552e-05
Streptococcus_anginosus	7.75591e-05	0	6.68342e-05	0	8.15084e-05	4.26391e-05	0	8.75197e-05	0.000182643	0	1.40258e-05	0	2.76621e-05	0	0.000214761	0	0	2.96683e-05	0	0	5.4216e-05	2.86993e-05	5.43707e-05	0	0	0	5.76577e-05	1.36351e-05	0	0.000587287	1.43664e-05	0	0.00209952	1.66931e-05	0	1.68316e-05	4.45845e-05	7.98478e-05	4.75391e-05	0.000136145	1.54109e-05	1.53424e-05	1.64341e-05	0	1.92805e-05	0	0	1.44361e-05	1.40276e-05
Streptococcus_parauberis	0.000139606	6.77874e-05	0	0	4.07542e-05	5.68521e-05	0	0	0	0	1.40258e-05	0	0	0.000322367	0	0.000229878	0.000154847	1.48342e-05	0.000151046	0.000184728	1.3554e-05	0.000129147	1.35927e-05	2.73299e-05	0	0.000225652	0	1.36351e-05	0.000220778	0	5.74655e-05	0.000280396	0	0.000150238	0.000143369	1.68316e-05	0.000118892	0	0	0	9.24656e-05	4.60271e-05	0.000262946	8.66001e-05	3.85609e-05	0	0	0	2.80552e-05
Sutterella_wadsworthensis	0	0	0	0	0	9.94912e-05	0.000269764	0	0	0	0	0	0	0	0	0	0	0	0.000694812	1.67935e-05	0.00108432	0	0	0	0	0	0	0	0	0	0	0	0	0	0	1.68316e-05	0	0	1.58464e-05	0	0	1.53424e-05	0	0	5.78414e-05	0	0	0	0
Veillonella_atypica	0.000217165	9.49024e-05	1.33668e-05	2.81555e-05	4.07542e-05	7.10651e-05	0	0.000364665	0.000983464	1.40229e-05	7.01292e-05	0.00020943	1.38311e-05	5.37278e-05	0.000272031	0	0	0.000682371	0.00036251	0	0.00157226	4.3049e-05	0.0012913	1.36649e-05	0.000175904	0	1.44144e-05	5.45405e-05	7.88494e-05	0.000792155	0	3.11551e-05	0	3.33862e-05	0	0.000168316	0	0.0182452	3.16927e-05	1.36145e-05	3.08219e-05	3.06847e-05	0	0	1.92805e-05	1.46888e-05	4.32707e-05	0.00229533	4.20828e-05
Weissella_jogaejeotgali	0.000139606	2.7115e-05	0	0	5.4339e-05	8.52781e-05	0	0	0	0	1.40258e-05	0	0	0.000107456	0	0.000377656	0.000309693	2.96683e-05	0.000286987	0.000369456	5.4216e-05	0.000114797	0	5.46597e-05	1.35311e-05	0.000210609	2.88288e-05	1.36351e-05	0.000220778	0	0.000287327	0.000295973	5.52507e-05	0.00026709	0.000334528	3.36632e-05	0.000133753	0	0	1.36145e-05	0.000308219	9.20542e-05	0.000262946	0.000144333	5.78414e-05	0	0	0	7.0138e-05
Weissella_soli	0.000108583	1.35575e-05	0	0	4.07542e-05	0	0	0	0	0	0	0	0	8.95464e-05	0	0.000164198	0.000189257	2.96683e-05	0.000256778	0.000201521	1.3554e-05	2.86993e-05	0	4.09948e-05	1.35311e-05	0.000150435	5.76577e-05	0	7.88494e-05	0	5.74655e-05	0.00012462	3.68338e-05	0.000166931	0.000207089	6.73265e-05	8.91689e-05	0	9.50781e-05	0	0.000184931	7.67118e-05	0.000147907	7.21667e-05	0.000154244	1.46888e-05	0	0	2.80552e-05
Weissella_viridescens	0.000387795	9.49024e-05	1.33668e-05	0	0.000176602	0.000198982	1.49869e-05	0	0	0	0	0	0	0.000340276	0	0.000755312	0.000671002	5.93366e-05	0.000513556	0.000570978	2.7108e-05	0.000186546	0	0.000136649	5.41243e-05	0.000451304	0.00012973	0	0.000425787	9.56049e-05	0.000617754	0.000342706	0.00101293	0.000617645	0.000509757	0.00052178	0.000386399	2.66159e-05	0.000443698	0	0.000462328	0.000414244	0.000854574	0.000274234	0.00104114	0	0	0	0.000210414
Weizmannia_ginsengihum	0.000325748	4.06725e-05	0	1.40778e-05	0.000217356	0.000156343	0	0	0	0	0	0	0	0.000465641	0	0.000673213	0.000602182	1.48342e-05	0.000468243	0.000554184	8.1324e-05	0.000129147	1.35927e-05	1.36649e-05	2.70621e-05	0.000451304	8.64865e-05	0	0.000410017	0	0.000287327	0.000327128	0.00053409	0.000350555	0.000493827	0.000605938	0.000133753	1.3308e-05	0.000221849	0	0.000369862	0.000291505	0.000328682	0.0002598	0.000636255	0	0	0	8.41656e-05
[Clostridium]_leptum	1.55118e-05	4.06725e-05	0	5.63111e-05	0	7.10651e-05	0.000734357	5.83465e-05	0.000604128	2.80458e-05	0	6.981e-05	6.91553e-05	0.000179093	1.43174e-05	0	0	8.90049e-05	0	0	0	2.86993e-05	0	6.83247e-05	0	0	0	0.000109081	0	0.000204868	0	0	0	0	0	6.73265e-05	7.43075e-05	0	1.58464e-05	5.44581e-05	0	0	0	0	1.92805e-05	0.00179204	1.44236e-05	1.44361e-05	0.000687353
unclassified_Acetobacter	0.00625126	0.000664317	0.000360905	8.44666e-05	0.00239091	0.00146394	0.00019483	0.000218799	0.00028099	0.00019632	0.000308568	0.000181506	0.000235128	0.00906209	0.00044384	0.0109028	0.0112866	0.000697205	0.0075372	0.0101768	0.000623484	0.00241075	0.000135927	0.000614922	0.000405932	0.00794296	0.00152793	4.09054e-05	0.00884691	5.46314e-05	0.00515753	0.00697874	0.00475156	0.0105333	0.0104022	0.00311385	0.00384913	0.00013308	0.00234526	0.00014976	0.00710444	0.00398901	0.0103535	0.00388257	0.00530212	0.000205643	0.000144236	0.000101052	0.00140276
unclassified_Acetobacteraceae	0.000791102	5.42299e-05	4.01005e-05	4.22333e-05	0.00025811	0.000198982	1.49869e-05	0	1.40495e-05	0	0	1.3962e-05	0	0.00123574	0	0.00110013	0.00137642	4.45025e-05	0.000860962	0.00112516	5.4216e-05	0.000344392	1.35927e-05	9.56546e-05	1.35311e-05	0.000962782	0.000158559	0	0.00105658	0	0.000531556	0.00116832	0.000607757	0.00110174	0.00117881	0.000706928	0.000460706	0	0.00034862	2.7229e-05	0.00101712	0.000644379	0.00123256	0.000635067	0.00084834	1.46888e-05	0	1.44361e-05	0.000154304
unclassified_Acidaminococcus	0	0	0	0	1.35847e-05	0	0	0	0	0	0	0	0	0	0	0	0	0	0	0	0	0	0	0	0	0	0	0	0	0	0	0	0	0	0	0	0	0	0	0	0	0	0	0	0	0	0	0	0.000729436
unclassified_Acinetobacter	0.00148913	0.000474512	8.0201e-05	0	0.000448296	0.000525882	5.99475e-05	4.37598e-05	8.42969e-05	9.81602e-05	9.81808e-05	2.7924e-05	9.68175e-05	0.0017372	0.000157492	0.00262717	0.00261519	0.00035602	0.00194849	0.00223353	0.000243972	0.000645735	4.0778e-05	0.000273299	4.05932e-05	0.0019707	0.000576577	5.45405e-05	0.00216047	2.73157e-05	0.00147974	0.00179142	0.00200744	0.00232034	0.00253286	0.00121188	0.0010403	1.3308e-05	0.000887396	1.36145e-05	0.00174144	0.00164163	0.00215287	0.001299	0.00200517	8.81329e-05	0.000129812	2.88721e-05	0.00126248
unclassified_Adlercreutzia	0	0.000772777	4.01005e-05	0.0001267	2.71695e-05	0.000369539	0	0	5.61979e-05	9.81602e-05	1.40258e-05	5.5848e-05	0.000152142	0.000107456	8.59045e-05	0	0	1.48342e-05	0	0	0	0.000229595	0	9.56546e-05	6.76553e-05	1.50435e-05	1.44144e-05	8.18107e-05	0	4.09735e-05	0	1.55775e-05	0	0	0	0.00010099	0.000208061	0	1.58464e-05	4.08436e-05	0.000215753	0	0	0.000577334	3.85609e-05	0	0.00102407	0	0
unclassified_Advenella	0.000201654	4.06725e-05	0	0	4.07542e-05	8.52781e-05	0	1.45866e-05	0	0	0	0	0	0.000197002	0	0.000558274	0.000344104	0	0.00039272	0.000520597	0	4.3049e-05	0	5.46597e-05	1.35311e-05	0.000255739	1.44144e-05	0	0.000394247	0	0.000244228	0.000405016	0.000276253	0.000333862	0.000350458	0.000134653	0.000118892	1.3308e-05	0.000142617	0	0.000200342	0.000214793	0.000410853	0.000115467	0.000250646	0	0	0	2.80552e-05
unclassified_Aerococcaceae	0	0	0	0	0	1.4213e-05	0	0	0	0	0	0	0	0	0	0	0	0	0	0	0	0	0	0	0	0	0	0	0	0	0	1.55775e-05	0	0	0	0	0	0	0	0	0	0	0	0	0	0	0	0	0
unclassified_Aeromonas	1.55118e-05	1.35575e-05	0.000120302	1.40778e-05	1.35847e-05	0	0.000224803	8.75197e-05	0.000295039	0.000154252	0.000308568	8.3772e-05	0.000165973	0	0.00044384	1.64198e-05	1.72052e-05	2.96683e-05	0	0	0	1.43497e-05	5.43707e-05	0	0	0	0	0	0	0	1.43664e-05	0	0.000110501	0	1.59299e-05	5.04948e-05	1.48615e-05	0	1.58464e-05	2.7229e-05	6.16437e-05	4.60271e-05	1.64341e-05	1.44333e-05	7.71218e-05	0.000146888	0.000129812	0.000129924	0
unclassified_Agathobacter	0.0147983	0.100339	0.00895578	0.0114171	0.00145357	0.00817249	0.070903	0.0151555	0.000702474	0.0437654	0.0690211	0.0493557	0.0552551	0.00537278	0.0213616	0.000262717	0.000671002	0.0222661	0.00746167	0.000822879	0.0962605	0.0347119	0.0126548	0.0425116	0.152414	0.001384	0.00183063	0.034156	0.0364757	0.0866044	0.00099128	0.0253291	0.00624332	0.0104666	0.000892075	0.091059	0.00230353	0.000385931	0.00611669	0.00639882	0.0123904	0.0127955	0.000115039	0.0113446	0.0095631	0.0237959	0.0840894	0.0685857	0.000196386
unclassified_Akkermansia	0.000325748	0.000176247	0.000588141	0.00748937	0.000163017	0.000966486	0.000164856	0.00013128	8.42969e-05	0.000154252	0.000294543	0.00013962	0.0232224	0.000358185	0.0494237	0.000426915	0.00043013	0.000593366	0.000151046	0.000184728	6.777e-05	0.000129147	0.00732646	0.0124898	0.000230028	0.000150435	0.000158559	5.45405e-05	0.000173469	2.73157e-05	0.00156593	0.00476673	0.00154702	0.00026709	0.00834727	0.00474652	0.00112947	1.3308e-05	0.00034862	0.00042205	0.000292808	0.000552325	0.000542326	0.000202067	0.00154244	0.000528797	0.0017741	0.0119242	0.00150095
unclassified_Alcaligenes	0.00370732	0.000284707	0.000106935	7.03888e-05	0.00123621	0.00108019	7.49344e-05	8.75197e-05	0	0	1.40258e-05	0	0	0.00338485	0	0.00656793	0.00584976	0.000578532	0.00481837	0.0059113	0.000447282	0.00153541	5.43707e-05	0.000478273	0.000243559	0.00491922	0.00126847	1.36351e-05	0.00537753	1.36578e-05	0.00343356	0.00475115	0.00569082	0.00612637	0.00608523	0.00346731	0.00225895	6.65398e-05	0.00242449	2.7229e-05	0.00468492	0.00490956	0.00603132	0.0033774	0.00613118	4.40665e-05	0	0	0.000687353
unclassified_Alistipes	0.00482417	0.00366052	0.00025397	0.000197089	9.50932e-05	0.00555729	0.00332709	4.37598e-05	0.0254858	0.0280317	0.000224413	0.00751155	0.0366385	0.00073428	0.00167514	1.64198e-05	0	0.000815878	3.02092e-05	0.000218315	4.0662e-05	0.0221128	4.0778e-05	0.01827	0.00905228	3.0087e-05	0.00291171	0.00478593	3.15398e-05	0.0177552	0.000229862	0.00503154	0.00974253	0.000150238	0.000461967	0.00944254	0.0075645	0.000106464	0.0112192	0.000136145	0.00289726	0.000398901	0	0.0001299	0.00593838	0.0127058	0.019443	0.0243969	0.00688755
unclassified_Allisonella	0	0	0	0	0	0	0	0	0	0	0	0	0	0	0	0	0	0.000192844	0	1.67935e-05	1.3554e-05	0	0	0	0	4.51304e-05	0	0	0	0.000641919	0	0.000264818	0.000349921	1.66931e-05	0	0.000504948	1.48615e-05	0	3.16927e-05	8.16871e-05	0	4.60271e-05	0	0	0	1.46888e-05	0	0	0
unclassified_Allobaculum	0.000232677	8.13449e-05	0.000133668	4.22333e-05	0.000108678	7.10651e-05	1.49869e-05	1.45866e-05	0.000112396	5.60915e-05	7.01292e-05	1.3962e-05	5.53243e-05	0.000197002	8.59045e-05	0.000344816	0.000481745	2.96683e-05	7.5523e-05	0.000470217	4.0662e-05	7.17484e-05	2.71854e-05	4.09948e-05	5.41243e-05	0.000180522	5.76577e-05	4.09054e-05	0.000126159	0	0.000186763	0.000249241	0	0.000317169	0.000111509	3.36632e-05	7.43075e-05	0	0	0	0.000123287	0.000107397	0.000525892	5.77334e-05	5.78414e-05	4.40665e-05	0	1.44361e-05	2.80552e-05
unclassified_Alloprevotella	0.000279213	4.06725e-05	0.000374272	1.40778e-05	0.000163017	5.68521e-05	1.49869e-05	0	1.40495e-05	2.80458e-05	4.20775e-05	5.5848e-05	0	0.000286548	7.15871e-05	0.00116581	0.000946285	0.000118673	0.000407824	0.00117554	0	0.000100448	1.35927e-05	6.83247e-05	4.05932e-05	0.000361043	0.00110991	4.09054e-05	0.000394247	0	0.000186763	0.000233663	5.52507e-05	0.00111844	0.000254879	5.04948e-05	0.000222922	2.66159e-05	3.16927e-05	4.08436e-05	0.000231164	0.000107397	0.00123256	0.0003897	0.000231365	1.46888e-05	1.44236e-05	1.44361e-05	2.80552e-05
unclassified_Allorhizobium_Neorhizobium_Pararhizobium_Rhizobium	0.000775591	6.77874e-05	6.68342e-05	0	0.000366788	0.00028426	0	0	0	1.40229e-05	2.80517e-05	0	0	0.00107456	1.43174e-05	0.00131359	0.001342	0.000133507	0.000906276	0.00178011	6.777e-05	0.000272644	5.43707e-05	0.000136649	4.05932e-05	0.000887565	0.000273874	1.36351e-05	0.00113543	0	0.00063212	0.000919075	0.00112343	0.00138553	0.00136997	0.00072376	0.000535014	1.3308e-05	0.000364466	1.36145e-05	0.000940067	0.00113534	0.00165985	0.000606201	0.00163884	2.93776e-05	0	0	5.61104e-05
unclassified_Aminobacterium	0	0	0.000441106	1.40778e-05	0.000122263	0	0	0	8.42969e-05	4.20687e-05	5.61033e-05	1.3962e-05	0	0.000465641	2.86348e-05	0.000509014	0.000808644	0	1.51046e-05	0.00048701	4.0662e-05	0	0	5.46597e-05	0	3.0087e-05	0	0	0	0	2.87327e-05	0	0	0.000767882	3.18598e-05	0	4.45845e-05	0	0	0	0	0	0.000493024	0	0	1.46888e-05	0	2.88721e-05	0
unclassified_Anaerostipes	0.000263701	0.000257592	0.00358231	0.000549033	0.000108678	0.00014213	4.49607e-05	0.000714744	0.00028099	0.0026363	0.0245031	0.00034905	0.00203317	0.000143274	0.000128857	8.20991e-05	0	0.000563698	0.00376105	3.35869e-05	0.00074547	2.86993e-05	0.0109149	0.000355288	0.00181316	4.51304e-05	0.000158559	8.18107e-05	0.000441557	0.000600945	2.87327e-05	0.000109043	0.000202586	0.00171939	0	0.00245742	0.000148615	0.000811786	0.000142617	0.000667111	1.54109e-05	0.000398901	0	0.000317534	5.78414e-05	0.000455353	0.000865414	0.00531247	0.0168752
unclassified_Anaerovoracaceae	0	0	0	0	0	1.4213e-05	0	0	0.010495	0	0	1.3962e-05	0	1.79093e-05	2.86348e-05	0	0	0	0	0	0	5.73987e-05	0	0.000245969	0	0	0	0	0	0	0	4.67326e-05	0	1.66931e-05	0	0	1.48615e-05	0	3.16927e-05	0.000163374	0	1.53424e-05	0	1.44333e-05	0	0.000132199	1.44236e-05	0.000202105	0.000210414
unclassified_Aquabacterium	0.000108583	0.00010846	0.000200503	9.85444e-05	8.15084e-05	4.26391e-05	0	0	0	0	0	0	0	0.000161183	1.43174e-05	0.000246297	0.000275283	5.93366e-05	0.000135941	0.000184728	8.1324e-05	7.17484e-05	8.15561e-05	0.000150314	8.11864e-05	0.000165478	5.76577e-05	5.45405e-05	0.000283858	2.73157e-05	0.000129297	0.000171353	0.000147335	0.000250396	0.000175229	0.000185148	7.43075e-05	1.3308e-05	0.000190156	6.80726e-05	0.000292808	0.000245478	0.000345117	8.66001e-05	0.000231365	0	0	0	2.80552e-05
unclassified_Arsenophonus	0.000186142	2.7115e-05	0	0	0.000108678	7.10651e-05	0	0	0	0	0	0	0	0.000340276	0	0.000311977	0.000361309	0	0.000181255	0.000352663	0	0.000114797	0	2.73299e-05	0	0.000165478	8.64865e-05	0	0.000362707	1.36578e-05	0.00015803	0.000327128	0	0.000300476	0.000302668	0	0.000133753	0	0	1.36145e-05	0.000277397	0.000214793	0.000443721	0.000144333	0	0	0	0	8.41656e-05
unclassified_Aureimonas	0.000635984	5.42299e-05	1.33668e-05	1.40778e-05	0.000217356	0.000227408	0	0	0	1.40229e-05	0	0	0	0.000823826	1.43174e-05	0.00108371	0.000911875	8.90049e-05	0.000709916	0.000822879	0.000149094	0.000286993	1.35927e-05	9.56546e-05	0	0.000707043	0.000144144	1.36351e-05	0.00100927	0	0.000531556	0.000560791	0.000607757	0.0009682	0.000812425	0.000605938	0.000445845	0	0.000507083	0	0.000616437	0.000690406	0.00100248	0.000461867	0.00107971	1.46888e-05	0	0	7.0138e-05
unclassified_Bacilli	0.0541362	0.00803959	0.00104261	0.000915055	0.0343015	0.0198698	0.000374672	0.000539705	0.000140495	0.00019632	5.61033e-05	9.7734e-05	9.68175e-05	0.0644197	0.000214761	0.0894552	0.0911875	0.0090785	0.0740579	0.0881153	0.00646525	0.027207	0.000475744	0.00937415	0.00595367	0.0726149	0.0209153	0.000599945	0.0782817	0.000437051	0.0605399	0.0691643	0.0688607	0.0766714	0.0854958	0.0430384	0.0391006	0.000771862	0.0362089	0.00042205	0.0632773	0.0559996	0.0925241	0.0521044	0.0682335	0.000470042	0.000173083	0.000259849	0.0174223
unclassified_Bacillus	0.0284332	0.00427061	0.00105598	0.000534955	0.0185703	0.0108445	0.000959161	0.000598051	0.00129255	0.00121999	0.00190751	0.000600366	0.000788371	0.0387198	0.00141742	0.0479295	0.0442517	0.0036937	0.0377766	0.0462156	0.00276501	0.0153398	0.000434966	0.00552063	0.00248972	0.0390228	0.00638559	0.000640851	0.0401344	0.00038242	0.0353844	0.0359841	0.0176434	0.038127	0.0436957	0.011395	0.0195726	0.000252851	0.00988812	0.000258676	0.0327945	0.0178892	0.0473631	0.0233387	0.0185285	0.000896018	0.000562519	0.000664059	0.00772921
unclassified_Bacteria	0.0195914	0.00154555	0.000441106	0.000295633	0.00667011	0.00459081	0.000299738	0.000175039	0.00054793	0.0290975	0.000224413	9.7734e-05	8.29864e-05	0.0185719	0.000257714	0.0311156	0.0362857	0.00194327	0.0233215	0.0332678	0.00158582	0.0067874	0.000244668	0.00170812	0.00150195	0.0219635	0.0049009	0.000177257	0.0284173	0.00031413	0.0137917	0.0259989	0.0161148	0.0279276	0.0321147	0.0101663	0.0102544	0.000199619	0.0076221	0.000190603	0.022238	0.0137621	0.0322438	0.013957	0.0190298	0.000161577	0.000274048	0.000346465	0.00398384
unclassified_Bacteroidales	1.55118e-05	0	0	0	0	0	0.00043462	0	2.8099e-05	1.40229e-05	0	1.3962e-05	0	0	0	1.64198e-05	0	0.00998339	0	0	0	0	2.71854e-05	1.36649e-05	1.35311e-05	1.50435e-05	2.88288e-05	0	4.73097e-05	0.00438417	1.43664e-05	0	0.00263361	1.66931e-05	0	1.68316e-05	0.00994234	0	0.000665547	0	0	0	0	0	1.92805e-05	0	0	0	1.40276e-05
unclassified_Bacteroides	0.00631331	0.0162961	0.00751216	0.00626461	0.000421127	0.00584155	0.0598426	0.0812329	0.055945	0.0653186	0.00817706	0.0645742	0.039626	0.000913373	0.0591453	0.000771732	0.000412925	0.0131876	0.0203761	0.000957227	0.0491874	0.0234043	0.0804551	0.0749658	0.0710381	0.00315913	0.00647207	0.017453	0.00320129	0.0158568	0.0154726	0.00528079	0.0171645	0.00111844	0.00136997	0.0207366	0.00896148	0.0829485	0.0639717	0.00978884	0.00328253	0.0027156	0.000460155	0.00479187	0.00842556	0.0918345	0.0462564	0.11149	0.0195405
unclassified_Bacteroidia	3.10236e-05	6.77874e-05	0	0.00123884	1.35847e-05	0	1.49869e-05	0	0	9.81602e-05	4.20775e-05	0	0	0	0	1.64198e-05	1.72052e-05	1.48342e-05	0	0	0	0.000286993	1.35927e-05	0.000423613	0	0	0.000432432	0	0	0	0	0	0	0	0	1.68316e-05	5.9446e-05	1.3308e-05	1.58464e-05	0	0	1.53424e-05	0	0	0	8.81329e-05	1.44236e-05	0	0
unclassified_Barnesiella	0.00366079	0.00188449	0.000895578	4.22333e-05	2.71695e-05	0.0119247	0.00665418	0.0148638	4.21484e-05	0.00377216	2.80517e-05	0.00728816	4.14932e-05	1.79093e-05	0.000286348	1.64198e-05	1.72052e-05	0.000875215	4.53138e-05	3.35869e-05	5.4216e-05	0.00241075	2.71854e-05	0.0164389	4.05932e-05	3.0087e-05	4.32432e-05	0.000927188	4.73097e-05	0.000532656	2.87327e-05	0.00236779	0.00360971	6.67724e-05	0.000621266	0.000336632	0.00282368	0	0.00315342	1.36145e-05	0.000246575	0.000138081	0	0.000245367	7.71218e-05	0.00487669	0.00274048	1.44361e-05	0
unclassified_Bifidobacterium	0.00051189	0.00626356	0.0048789	0.00670102	0.000353203	0.000341113	8.99213e-05	0.0348183	0.000393386	0.0205015	0.000280517	0.000153582	0.0318944	0.000322367	0.000458157	0.000344816	0.000120436	0.000341186	0.00634393	0.000251902	0.0153296	0.000258294	0.000774783	0.000232304	9.47175e-05	0.00804826	0.0037045	9.54459e-05	0.000268088	0.0108716	0.000229862	0.000373861	0.000442005	0.000283783	7.96495e-05	5.04948e-05	0.000505291	0.078477	0.00204418	0.00014976	0.000539383	0.00052164	6.57365e-05	0.000331967	0.00102186	0.000161577	0.000173083	0.000187669	0.0122882
unclassified_Blautia	0.00181488	0.00521963	0.0051195	0.00415294	0.0014264	0.0139856	0.0122443	0.0186125	0.00415865	0.00180895	0.00650799	0.00410483	0.00398335	0.00121783	0.00429523	0.000147778	0.000120436	0.0156204	0.00202402	0.000201521	0.0228791	0.00387441	0.0101809	0.0100301	0.00368045	0.000842435	0.00763964	0.00572675	0.00100927	0.00329154	0.00284454	0.00119947	0.00206269	0.000984893	0.000286738	0.0104019	0.00488943	0.00507033	0.00247203	0.00505099	0.00232705	0.00230135	4.93024e-05	0.00554241	0.00208229	0.0053908	0.0193853	0.0207446	0.00699978
unclassified_Brachybacterium	0.00411063	0.000488069	5.34674e-05	0.000112622	0.00207847	0.00126496	5.99475e-05	4.37598e-05	2.8099e-05	0	1.40258e-05	0	1.38311e-05	0.00891882	0	0.00975337	0.00882626	0.000400522	0.00667623	0.00854787	0.000325296	0.0019946	4.0778e-05	0.000601257	0.000311215	0.00559617	0.00085045	1.36351e-05	0.00665489	1.36578e-05	0.00443921	0.00676065	0.00204427	0.00909774	0.00925528	0.0012792	0.00273451	3.99239e-05	0.000839857	1.36145e-05	0.00579451	0.00254683	0.00866078	0.00327637	0.00264142	2.93776e-05	1.44236e-05	4.33082e-05	0.00102402
unclassified_Bradyrhizobium	0.000108583	5.42299e-05	0.000147035	7.03888e-05	5.4339e-05	0.000127917	4.49607e-05	2.91732e-05	5.61979e-05	8.41373e-05	8.4155e-05	2.7924e-05	0.00012448	0.000214911	7.15871e-05	0.000213458	0.000172052	8.90049e-05	9.06276e-05	0.000184728	5.4216e-05	4.3049e-05	1.35927e-05	5.46597e-05	1.35311e-05	9.02609e-05	4.32432e-05	2.72702e-05	0.000157699	2.73157e-05	0.000244228	0.000109043	0.000663008	0.00026709	0.000175229	0.000488117	0.000133753	1.3308e-05	0.000285234	0	0.000154109	0.000214793	0.000131473	4.33e-05	0.000829059	0	4.32707e-05	1.44361e-05	2.80552e-05
unclassified_Brevibacterium	0.0123784	0.00120662	0.000187136	0.000197089	0.00646634	0.0040365	0.00019483	0.000189626	8.42969e-05	7.01144e-05	5.61033e-05	2.7924e-05	0	0.0280459	5.72697e-05	0.0255328	0.0246894	0.00158725	0.0180802	0.025039	0.00120631	0.00529503	0.000285446	0.00185843	0.00075774	0.0188645	0.00272432	0.000163621	0.0190973	0.000122921	0.0134613	0.0183971	0.00681425	0.0259077	0.0237037	0.00451087	0.00808465	0.000119772	0.00399328	0.000122531	0.0160736	0.00699612	0.024832	0.00857341	0.00761578	0.000161577	2.88471e-05	4.33082e-05	0.00297385
unclassified_Brevundimonas	0.000139606	2.7115e-05	6.68342e-05	1.40778e-05	5.4339e-05	2.8426e-05	0	0	1.40495e-05	0	1.40258e-05	0	0	0.000125365	0	0.000164198	0.000154847	4.45025e-05	0.000105732	0.000100761	1.3554e-05	2.86993e-05	6.79634e-05	8.19896e-05	4.05932e-05	3.0087e-05	4.32432e-05	6.81756e-05	0.000157699	5.46314e-05	8.61982e-05	0.000140198	0.000110501	0.000133545	0.000143369	0.000201979	0.000133753	3.99239e-05	4.75391e-05	0.000108916	0.000215753	0.000153424	0.000131473	0.000158767	0.000289207	1.46888e-05	0	0	4.20828e-05
unclassified_Butyricicoccus	0.000403307	0.007782	0.00470513	0.00183011	0.000190186	0.00923847	0.00202323	0.00700158	0.00955365	0.000799304	0.0105615	0.00460746	0.0026694	0.000680552	0.000544062	4.92595e-05	1.72052e-05	0.00394589	0.00140473	3.35869e-05	0.00299543	0.00552462	0.011513	0.00538398	0.00262503	0.000165478	0.00184505	0.00943551	0.000946193	0.00551777	0.000430991	0.00221201	0.00178644	0.000617645	0.000143369	0.00136336	0.000193199	2.66159e-05	0.00256711	0.00119808	0.000893834	0.00243944	0	0.00161653	0.00291135	0.00233552	0.00571173	0.00804088	0.00495175
unclassified_Butyricimonas	0.000139606	0.000786334	6.68342e-05	0.00109807	0	0.000682225	0.000689397	0	0.00103966	0.00239791	0	0	0.00681872	0	0.00108812	0	0	0.000623034	0	8.39673e-05	2.7108e-05	0.00325738	1.35927e-05	0.0015578	0	0	0.000605405	0.000122716	0	0.00109263	1.43664e-05	0.000405016	1.84169e-05	0	6.37196e-05	0.000286137	0.000252645	1.3308e-05	0.000206003	0.00129338	0.000138698	1.53424e-05	0	5.77334e-05	1.92805e-05	0	0.00138466	1.44361e-05	0.00197789
unclassified_CAG_352	0.000217165	0	0	0	0	0	0	0	0	0	1.40258e-05	0	0	0	1.43174e-05	0	0	0	0	0	1.3554e-05	0	0.000706819	0	0	0	0	0	0	8.19471e-05	0	0	0	0	3.18598e-05	0	1.48615e-05	0	1.58464e-05	0	0	0	0	0	0	2.93776e-05	0	0	0
unclassified_CAG_56	0.000868661	0.00359273	0.000213869	0.00168933	0	0.00538674	0.000584489	0.00212965	0.00265535	0.000126206	0.000659214	0.00333692	0.00147992	0.00234611	0.00207603	0	1.72052e-05	0.00265531	0.000634393	0	0.00224996	0.000660085	0.00479822	0.00761137	0.000243559	0.000586696	0.00100901	2.72702e-05	1.57699e-05	0.00106531	1.43664e-05	0.00113716	0.00178644	0.000116852	6.37196e-05	0.00358513	0.0011592	1.3308e-05	0.000808164	0.00069434	0.000354451	0.000920542	3.28682e-05	4.33e-05	5.78414e-05	0.0087986	0.00350493	0.00327698	0
unclassified_Carnobacteriaceae	0.000480866	8.13449e-05	0	0	0.000217356	0.000156343	0	1.45866e-05	1.40495e-05	1.40229e-05	0	0	0	0.000465641	0	0.000853831	0.000739823	5.93366e-05	0.000498452	0.00110837	1.3554e-05	0.000301343	0	0.000109319	0	0.000346	5.76577e-05	1.36351e-05	0.000520406	0	0.000430991	0.000436171	0.000128918	0.000801269	0.000653126	8.41581e-05	0.000237784	1.3308e-05	7.92318e-05	0	0.000369862	0.000199451	0.000772404	0.000115467	9.64023e-05	0	0	0	0.000182359
unclassified_Catenibacterium	0	0	1.33668e-05	0	1.35847e-05	0.0017482	0	2.91732e-05	0	1.40229e-05	4.20775e-05	0	0	0	0	0	1.72052e-05	1.48342e-05	0	0	0	0	8.15561e-05	8.19896e-05	2.70621e-05	6.01739e-05	5.76577e-05	0	1.57699e-05	0.000819471	0	0	1.84169e-05	0	0	1.68316e-05	0	0	0	4.08436e-05	0	1.53424e-05	0	0	3.85609e-05	1.46888e-05	0	0	0
unclassified_Christensenellaceae	7.75591e-05	2.7115e-05	0.000106935	0.000858744	4.07542e-05	0.00193297	5.99475e-05	1.45866e-05	1.40495e-05	4.20687e-05	1.40258e-05	0.000321126	0.000138311	0.000143274	0.0104517	0	0	0.000192844	0	0	0	0.00044484	0.000122334	0.00295163	5.41243e-05	9.02609e-05	0.00726486	8.18107e-05	7.88494e-05	0.00187112	0	1.55775e-05	0.00029467	1.66931e-05	9.55795e-05	0.000403959	0.0027791	1.3308e-05	4.75391e-05	0	1.54109e-05	4.60271e-05	0	0.000158767	9.64023e-05	5.87553e-05	0.000331742	1.44361e-05	0
unclassified_Christensenellaceae_R_7_group	0.000961732	0.00546367	0.000280704	0.000985444	0.000190186	0.00211774	0.0387411	0.0128508	7.02474e-05	9.81602e-05	0.000140258	0.00720439	0.000221297	0.00508623	0.00721598	4.92595e-05	5.16156e-05	0.00422773	1.51046e-05	0.000235108	4.0662e-05	0.000602686	0.0245892	0.00147581	0.000595367	0.000135391	0.0281369	2.72702e-05	0.000157699	0.00111994	4.30991e-05	3.11551e-05	0.000478839	0.000317169	0.000477897	0.00908907	0.00532041	0	0.00152125	0.00295435	0.00289726	0.000184108	1.64341e-05	0.0107095	0.000462731	0.00290839	0.0169477	0.000360901	0.000112221
unclassified_Chryseobacterium	0.000124094	0	0	0	0.000122263	2.8426e-05	0	0	1.40495e-05	0	1.40258e-05	0	0	0.000161183	4.29523e-05	0.000443335	0.000326899	4.45025e-05	0.000226569	0.000218315	4.0662e-05	1.43497e-05	0	0	4.05932e-05	0.00039113	2.88288e-05	1.36351e-05	0.000173469	0	0.000215496	0.000311551	0.000221003	0.000300476	0.000430108	0.000168316	0.000208061	1.3308e-05	0.000126771	0	0.000231164	0.000214793	0.000262946	8.66001e-05	0.000134963	0	0	0	8.41656e-05
unclassified_Cloacibacillus	0	0	0	0	0	0	4.49607e-05	0	0	0	0	0	0	7.16371e-05	0	0	0	1.48342e-05	0	0	0	0.000330042	0	0.0023777	0	0	0.000158559	0	0	1.36578e-05	0	0	1.84169e-05	0	0	0	0.000490429	0	0	0.000762413	0	0	0	0	0	0.000514109	0	0	0
unclassified_Clostridia_UCG_014	0.00442087	0.00581616	0.000748543	0.0432328	0.00025811	0.00464766	0.00530536	0.0057763	0.000337188	0.0204173	0.000182336	0.035631	0.0147577	0.00216702	0.0211611	0.000246297	0.000137642	0.00462826	0.000120837	0.000403043	0.00767156	0.00150672	0.0475336	0.00844493	0.000162373	0.000120348	0.00377658	8.18107e-05	4.73097e-05	0.029979	0.000100565	0.00426825	0.000791926	0.000367248	0.00592593	0.0286306	0.049459	6.65398e-05	0.000475391	0.00042205	0.00214212	0.000567668	9.86047e-05	0.00391144	0.000520572	0.0403502	0.0025097	0.00857502	4.20828e-05
unclassified_Clostridium	0	0	0	0	0.000149432	0	0	1.45866e-05	0	0	1.40258e-05	0	0	0.000411913	0	0.000623953	0.000447335	1.48342e-05	3.02092e-05	0.000419836	1.3554e-05	0	0	4.09948e-05	0	0	1.44144e-05	0	0	0	2.87327e-05	1.55775e-05	0	0.000550872	0	1.68316e-05	1.48615e-05	0	0	0	3.08219e-05	1.53424e-05	0.000542326	2.88667e-05	0	0	0	0	0
unclassified_Clostridium_sensu_stricto_1	0.00221819	0.00532809	0.00239266	0.000844666	0.00229582	0.012209	0.000524541	0.00498862	0.000477682	0.000224366	0.000855576	0.00142412	0.000802202	0.00238193	0.00154628	0.00293915	0.00294209	0.00053403	0.00167661	0.00275413	0.00506919	0.000760533	0.0559475	0.000642252	0.0194441	0.00303878	0.00085045	0.000122716	0.00203432	6.82892e-05	0.0015372	0.00174468	0.00211794	0.0036224	0.00240542	0.00124554	0.00202116	0.00051901	0.00343866	0.000163374	0.00203424	0.00320655	0.00248155	0.0039836	0.00231365	0.0022327	0.0171208	0.0154321	0.000378745
unclassified_Clostridium_sensu_stricto_3	0.000124094	5.42299e-05	0	0.000154855	0.000108678	0.000156343	1.49869e-05	2.91732e-05	1.40495e-05	5.60915e-05	0	1.3962e-05	0.00012448	0.000143274	2.86348e-05	0.000279137	0.000326899	1.48342e-05	0.000120837	0.000235108	1.3554e-05	0.000100448	0	0	2.70621e-05	0.000255739	1.44144e-05	0	0.000110389	0	0.000215496	0.00012462	0.000313087	0.000233703	0.000191159	0.000151485	8.91689e-05	0	0.00017431	0	0.000123287	0.000168766	0.000328682	0.000202067	0.00044345	0	0	0	2.80552e-05
unclassified_Colidextribacter	7.75591e-05	2.7115e-05	0.000414372	2.81555e-05	5.4339e-05	2.8426e-05	5.99475e-05	2.91732e-05	5.61979e-05	5.60915e-05	0.000126233	6.981e-05	4.14932e-05	0.000161183	5.72697e-05	0.000311977	0.000120436	0.000163176	4.53138e-05	0.000251902	5.4216e-05	0	0.000176705	0.000150314	0.000135311	6.01739e-05	1.44144e-05	5.45405e-05	3.15398e-05	8.19471e-05	0.000100565	3.11551e-05	0.000128918	0.000250396	6.37196e-05	1.68316e-05	7.43075e-05	2.66159e-05	7.92318e-05	0	6.16437e-05	3.06847e-05	0.000164341	2.88667e-05	0.000269926	0.000102822	2.88471e-05	0.000187669	7.0138e-05
unclassified_Collinsella	9.30709e-05	0.00315889	0.00199166	0.000267478	0.0012498	0.000810142	0.00067441	0.000306319	0.0012504	0.000350572	0.000280517	0.000670176	1.38311e-05	0	0.0026344	1.64198e-05	0	0.000326351	1.51046e-05	1.67935e-05	1.3554e-05	0	4.0778e-05	0.000505603	1.35311e-05	0.000165478	0.000403604	0.000545405	0.000189239	0.00101068	1.43664e-05	0.000342706	0.000184169	0.000166931	4.77897e-05	0.00107722	0.00108489	1.3308e-05	0.00843026	5.44581e-05	0.000308219	0.000429586	0	0	0.00173524	0.00110166	0.00271163	0.0016024	4.20828e-05
unclassified_Comamonas	0.000294724	0.00016269	0.000334171	4.22333e-05	0.000176602	0.000369539	2.99738e-05	0	4.21484e-05	4.20687e-05	1.40258e-05	1.3962e-05	0.000138311	0.000608915	0.000143174	0.000591114	0.000584976	0.000118673	0.000407824	0.000738912	4.0662e-05	0.000272644	1.35927e-05	4.09948e-05	6.76553e-05	0.000556609	0.000100901	0	0.000473097	2.73157e-05	0.000416625	0.000529636	0.000663008	0.000584258	0.000716846	0.000370296	0.000341814	0	0.000633854	0	0.00049315	0.00052164	0.000739536	0.000288667	0.000559133	0	5.76942e-05	1.44361e-05	7.0138e-05
unclassified_Companilactobacillus	0.0052585	0.000989696	0.000120302	8.44666e-05	0.0029343	0.00221723	4.49607e-05	5.83465e-05	0	2.80458e-05	0	1.3962e-05	2.76621e-05	0.00583842	0	0.00908016	0.00774234	0.000637869	0.00685749	0.00881657	0.000799686	0.00284124	4.0778e-05	0.000778901	0.000419463	0.0073713	0.00148468	2.72702e-05	0.00703337	5.46314e-05	0.00709699	0.00649583	0.00475156	0.00756197	0.00739148	0.0029792	0.00364107	5.32318e-05	0.0028365	9.53016e-05	0.0055017	0.00371285	0.00821706	0.00379597	0.00445378	1.46888e-05	4.32707e-05	0	0.00165526
unclassified_Coprobacillus	0	0	4.01005e-05	1.40778e-05	0	1.4213e-05	0	0	0.000323138	0	0	0	1.38311e-05	0	0.000257714	0	0	1.48342e-05	0	0	0	0	0	0	5.41243e-05	0	0	0	0	0	0	0	1.84169e-05	0	6.37196e-05	0	0.00138212	1.3308e-05	0	0.000340363	0	3.06847e-05	1.64341e-05	4.33e-05	1.92805e-05	1.46888e-05	0.000245201	1.44361e-05	0
unclassified_Coprobacter	3.10236e-05	6.77874e-05	0	1.40778e-05	0	0	0	0	1.40495e-05	0	0	0	0.00065006	0	7.15871e-05	0	0	0	1.51046e-05	0	1.3554e-05	1.43497e-05	0	0.000669582	0	0	2.88288e-05	0.000477229	0	0	1.43664e-05	0	0.000110501	0	1.59299e-05	0	0	0	0.000110924	0	0.000138698	0	0	0	0	0	0	0	0
unclassified_Coprococcus	0.00493276	0.0144387	0.00189809	0.0308725	0.00051622	0.00983541	0.00275759	0.00360289	0.00191073	0.000462755	0.00166907	0.0368317	0.0389898	0.0038684	0.0214475	0.000246297	0.000103231	0.0473655	0.000936485	0.000100761	0.012307	0.0022529	0.00326224	0.0325772	0.00179963	0.00151939	0.0454054	0.00152713	0.000315398	0.0133164	0.000143664	0.00682296	0.0153044	0.000767882	0.000700916	0.0134653	0.00628641	0.000146388	0.00131525	0.00216471	0.00335958	0.000935884	4.93024e-05	0.00698574	0.000886901	0.00950366	0.0166592	0.010957	0.0241415
unclassified_Coriobacteriales_Incertae_Sedis	0.00017063	0.00126085	1.33668e-05	0.0003801	0	4.26391e-05	0.000569502	1.45866e-05	1.40495e-05	1.40229e-05	2.80517e-05	0.000195468	8.29864e-05	7.16371e-05	0.000515427	0	0	0.000637869	0	0	0	0.000258294	0	0.000273299	0	0.000165478	0.000302703	0	0	0.00195307	1.43664e-05	1.55775e-05	7.36675e-05	5.00793e-05	3.18598e-05	0.000269306	1.48615e-05	0	1.58464e-05	0	4.62328e-05	1.53424e-05	1.64341e-05	0.00261244	0.000115683	8.81329e-05	0.000533672	0	8.41656e-05
unclassified_Corynebacterium	0.00269906	0.00037961	0.000133668	2.81555e-05	0.00127697	0.000895421	2.99738e-05	0.000102106	1.40495e-05	0	1.40258e-05	1.3962e-05	0	0.00487132	1.43174e-05	0.00512298	0.00440453	0.000192844	0.00371573	0.00445027	0.00013554	0.00110492	5.43707e-05	0.000259634	0.000162373	0.0039113	0.00036036	4.09054e-05	0.00364284	4.09735e-05	0.00257158	0.00375419	0.000755092	0.00462399	0.00455595	0.00052178	0.00175366	3.99239e-05	0.000412005	6.80726e-05	0.00302054	0.00124273	0.00488093	0.0015155	0.000713377	2.93776e-05	2.88471e-05	0	0.000729436
unclassified_Cronobacter	0.00017063	8.13449e-05	0.00167085	0	6.79237e-05	5.68521e-05	1.49869e-05	0	0.00103966	0.000140229	0.000126233	2.7924e-05	4.14932e-05	0.000286548	0.000171809	0.000131359	0.000240873	0.000118673	0.000151046	0.000268695	2.7108e-05	8.6098e-05	2.71854e-05	4.09948e-05	1.35311e-05	0.000240696	2.88288e-05	0.000163621	0.000236548	0	0.000186763	0.000233663	0.000110501	0.00026709	0.000191159	5.04948e-05	0.000178338	2.66159e-05	9.50781e-05	0.00204218	0.000523972	0.000490956	0.000295814	8.66001e-05	7.71218e-05	0	1.44236e-05	0	8.41656e-05
unclassified_Cyanobacteriales	0.000573937	0.000122017	0.000387638	1.40778e-05	0.000421127	0.000213195	0.00019483	0.000116693	0.000379336	0.00549697	0.000406749	0.000153582	0.000179804	0.000519369	0.00038657	0.00106729	0.00130759	0.000252181	0.000649498	0.00104119	0.000108432	0.000315693	8.15561e-05	9.56546e-05	6.76553e-05	0.000481391	0.000115315	1.36351e-05	0.00118274	9.56049e-05	0.000531556	0.000996962	0.000773509	0.000984893	0.00105137	0.000403959	0.000490429	1.3308e-05	0.000380312	5.44581e-05	0.000801368	0.000613695	0.00115039	0.000562901	0.000674816	0.000205643	0.000187506	7.21803e-05	0.000140276
unclassified_Desulfovibrio	0	0	0	0	0	0	1.49869e-05	0.00625766	0	0	1.40258e-05	0	0	0	0	0	0	7.41708e-05	0	0	0	0	1.35927e-05	0	0	0	0	0	0	0	0	0	1.84169e-05	3.33862e-05	0	0	0	0	0	0	0	3.06847e-05	0	0	1.92805e-05	0	0	0	0
unclassified_Desulfovibrionaceae	0	2.7115e-05	0.000147035	2.81555e-05	2.71695e-05	1.4213e-05	1.49869e-05	1.45866e-05	4.21484e-05	4.20687e-05	0.00016831	4.1886e-05	2.76621e-05	0	5.72697e-05	3.28396e-05	1.72052e-05	0.00043019	1.51046e-05	0	8.1324e-05	0	9.51488e-05	1.36649e-05	0.000108249	0	1.44144e-05	2.72702e-05	4.73097e-05	2.73157e-05	2.87327e-05	6.23101e-05	0.000184169	6.67724e-05	0	0.000151485	0	3.99239e-05	7.92318e-05	0	0	0.000138081	1.64341e-05	2.88667e-05	0.000366329	4.40665e-05	2.88471e-05	2.88721e-05	0
unclassified_Dialister	0	0	0	0	1.35847e-05	0	0	0	0	0	0	0	0	0	0	6.56793e-05	0	0.0526464	9.06276e-05	0	0	0	2.71854e-05	0	2.70621e-05	0	0	0	0	0.0548636	2.87327e-05	0.00012462	0.000239419	1.66931e-05	0	0	0	1.3308e-05	1.58464e-05	1.36145e-05	0	0	0	0	0	0	0	0	0
unclassified_Dorea	0.000946221	0.00227766	0.00155055	0.000830588	0.00426561	0.00375224	0.00481079	0.00606803	0.000379336	0.00019632	0.00157089	0.00131243	0.000857526	0.000465641	0.00125993	4.92595e-05	1.72052e-05	0.00941969	0.000513556	8.39673e-05	0.00231773	0.00129147	0.0040778	0.000833561	0.00219203	0.000361043	0.000576577	0.00058631	0.000126159	0.000778497	1.43664e-05	0.000327128	0.000221003	0.000166931	3.18598e-05	0.00158217	0.000787659	5.32318e-05	0.000380312	0.000326748	0.000801368	0.000429586	1.64341e-05	0.00118353	0.00138819	0.00251179	0.00742813	0.000346465	0.000547077
unclassified_Dubosiella	4.65354e-05	2.7115e-05	0.000748543	2.81555e-05	8.15084e-05	1.4213e-05	0	0	1.40495e-05	0	2.80517e-05	0	0	1.79093e-05	0	0.000213458	0.000172052	5.93366e-05	0.000120837	0.000201521	6.777e-05	1.43497e-05	2.71854e-05	6.83247e-05	2.70621e-05	6.01739e-05	2.88288e-05	1.36351e-05	0.000141929	4.09735e-05	2.87327e-05	0.00012462	9.20844e-05	0.000150238	4.77897e-05	6.73265e-05	4.45845e-05	2.66159e-05	1.58464e-05	2.7229e-05	6.16437e-05	4.60271e-05	0.000230078	4.33e-05	0.000173524	0	0	0	1.40276e-05
unclassified_Eggerthella	0	5.42299e-05	9.35679e-05	0	1.35847e-05	0	1.49869e-05	0.000204213	2.8099e-05	2.80458e-05	0.000126233	1.3962e-05	1.38311e-05	0	1.43174e-05	0	0	0	0	0	0.00104366	8.6098e-05	0.000149519	0.000136649	0.000189435	0	2.88288e-05	2.72702e-05	0	0	2.87327e-05	0	0	0	3.18598e-05	1.68316e-05	0	0	0	1.36145e-05	0	1.53424e-05	0	0.0002165	0	0	2.88471e-05	0.000115488	5.61104e-05
unclassified_Eisenbergiella	0	1.35575e-05	0	0	1.35847e-05	2.8426e-05	0	0.000379252	0	0.000112183	0.000364672	0	0	0	0.000400888	0	0	4.45025e-05	0	0	0	1.43497e-05	0	0.000122984	0.000351808	0	0	0	0	1.36578e-05	0	0	0	0	1.59299e-05	0	1.48615e-05	0	3.16927e-05	0	0	0	0	0	0	7.34441e-05	0	1.44361e-05	0.000168331
unclassified_Enhydrobacter	0.00017063	0	4.01005e-05	1.40778e-05	4.07542e-05	2.8426e-05	1.49869e-05	1.45866e-05	0	1.40229e-05	4.20775e-05	1.3962e-05	1.38311e-05	5.37278e-05	0	8.20991e-05	8.60259e-05	5.93366e-05	6.04184e-05	0.000151141	0	0	0	1.36649e-05	1.35311e-05	0.000135391	4.32432e-05	0	9.46193e-05	0	8.61982e-05	0.000109043	0.000110501	0.000166931	0.000223019	6.73265e-05	4.45845e-05	0	4.75391e-05	0	0.000123287	0.000107397	0.000131473	8.66001e-05	0.000192805	2.93776e-05	0	1.44361e-05	2.80552e-05
unclassified_Enterobacter	6.20472e-05	2.7115e-05	5.34674e-05	0	1.35847e-05	2.8426e-05	1.49869e-05	0	0	1.40229e-05	2.80517e-05	0	1.38311e-05	0.000268639	2.86348e-05	0.000164198	0.000206462	5.93366e-05	0.000105732	0.000251902	2.7108e-05	2.86993e-05	1.35927e-05	0	1.35311e-05	0.000210609	1.44144e-05	1.36351e-05	0.000173469	1.36578e-05	1.43664e-05	4.67326e-05	1.84169e-05	0.000100159	0.000111509	3.36632e-05	5.9446e-05	0	3.16927e-05	0.000285905	0.000107877	7.67118e-05	0.000230078	5.77334e-05	0.000154244	1.46888e-05	0	1.44361e-05	0
unclassified_Enterobacterales	0.00255945	0.000664317	0.00163075	4.22333e-05	0.000502635	0.000781716	0.000284751	7.29331e-05	0.000983464	0.00019632	8.4155e-05	6.981e-05	4.14932e-05	0.00419077	0.000186126	0.00371088	0.00418086	0.00136474	0.00270372	0.00401364	0.000379512	0.00114797	1.35927e-05	0.000259634	0.000175904	0.00270783	0.000735135	0.00565858	0.00332745	8.19471e-05	0.0015372	0.00280396	0.00244945	0.00375595	0.00360016	0.00146435	0.00170907	0.000106464	0.00115678	0.000381207	0.00303595	0.00219396	0.00369768	0.00206397	0.0123009	5.87553e-05	4.32707e-05	2.88721e-05	0.000378745
unclassified_Enterobacteriaceae	0.00375386	0.00696855	0.0840908	0.000168933	0.000747161	0.000980699	0.0052604	0.000685571	0.0385096	0.00161263	0.000196362	0.000851682	0.00038727	0.00531905	0.00483929	0.00479459	0.00574653	0.00947902	0.0039272	0.00602885	0.00473034	0.00209505	0.000258261	0.000505603	0.000527712	0.00400156	0.000879279	0.0250477	0.00485712	0.00101068	0.00258595	0.00468884	0.00257836	0.0058092	0.0044763	0.00169999	0.00682142	0.00196958	0.0163693	0.386911	0.00602567	0.00262354	0.00534109	0.0022949	0.00347048	0.000719752	0.00131254	0.000288721	0.000420828
unclassified_Enterococcus	0.00150465	0.00021692	8.0201e-05	0	0.000964517	0.000554308	0.00023979	2.91732e-05	0.00123635	5.60915e-05	0.00067324	0.000404898	0.000290452	0.00146856	0.000515427	0.00193754	0.00192698	0.000192844	0.001299	0.00178011	0.000162648	0.000789232	0	0.000191309	0.000148842	0.00156452	0.000187387	0.000231797	0.00165584	0.000163894	0.0015803	0.00144871	0.000607757	0.00175278	0.00167264	0.000218811	0.0011592	0.000146388	0.000269388	0.000163374	0.00135616	0.000536983	0.00215287	0.000909301	0.000771218	0.000102822	1.44236e-05	7.21803e-05	0.000364718
unclassified_Erysipelatoclostridium	0	1.35575e-05	5.34674e-05	0	0	0	0	0	7.02474e-05	2.80458e-05	0.000280517	0	0	3.58185e-05	7.15871e-05	0	0	0	1.51046e-05	0	0	0	0	2.73299e-05	0	0	0	0	1.57699e-05	0	1.43664e-05	0	5.52507e-05	1.66931e-05	9.55795e-05	0	0.00216978	0.000173003	0	5.44581e-05	1.54109e-05	1.53424e-05	0	2.88667e-05	0	1.46888e-05	0	0	0.000687353
unclassified_Erysipelotrichaceae_UCG_003	0.000899685	0.00718547	0.00272684	0.0126418	0.00999837	0.000582734	0.00158861	0.00180874	0.00827515	1.40229e-05	0.00148674	0.00141016	0.0014246	0.000143274	0.00226215	0	1.72052e-05	0.0023438	0.000347406	6.71738e-05	0.00258881	0.00485019	0.00274572	0.00166712	0.00192141	7.52174e-05	0.00283964	0.00140442	0.000725415	0.000232183	0.00205439	0.000342706	0.000257836	0.00100159	6.37196e-05	0.00308019	0.000520152	0.00239543	0.000649701	0.000122531	0.000308219	0.000429586	8.21706e-05	0.00178974	0.000231365	0.00362814	0.00137024	0.00290165	1.40276e-05
unclassified_Escherichia_Shigella	0.00618921	0.00200651	0.0924718	0.00111214	0.579471	0.0200262	0.164601	0.00580547	0.0930919	0.3369	0.247879	0.00108904	0.0470118	0.00539069	0.00240533	0.00507373	0.00545404	0.0368332	0.00546786	0.00475255	0.0078071	0.0155407	0.00333021	0.0115742	0.0251813	0.027349	0.0274018	0.053477	0.00700183	0.0038242	0.286006	0.00799128	0.00298354	0.0072615	0.00806053	0.00509998	0.00988289	0.0419866	0.0149431	0.0220964	0.00759759	0.00458737	0.0061628	0.00700017	0.00497436	0.00311403	0.0111061	0.00181894	0.298255
unclassified_Faecalibacterium	0.064979	0.230301	0.0627573	0.176718	0.00296147	0.0921857	0.14308	0.283374	0.252427	0.117708	0.0555283	0.12119	0.23676	0.0459194	0.0881523	0.00262717	0.00142803	0.119148	0.0593762	0.00335869	0.340802	0.0835007	0.125773	0.13326	0.109493	0.0180522	0.100685	0.0474093	0.0513941	0.157625	0.00231299	0.0475271	0.0292276	0.013872	0.00385504	0.0811621	0.0420283	0.0815645	0.0596457	0.031926	0.0391129	0.0433268	0.000361551	0.073076	0.0264721	0.157714	0.155601	0.193255	0.0755527
unclassified_Faecalitalea	1.55118e-05	2.7115e-05	2.67337e-05	1.40778e-05	4.07542e-05	0	0	4.37598e-05	2.8099e-05	0	0.000603111	4.1886e-05	0.000110649	0	0	0	0	0	0	0	0.000149094	0.00110492	6.79634e-05	0.000150314	0.000744209	0	0	0.000204527	0	0	5.74655e-05	0	0	0	0	0	0	1.3308e-05	1.58464e-05	0.000517352	0	0	0	1.44333e-05	7.71218e-05	1.46888e-05	0	0.000115488	2.80552e-05
unclassified_Family_XIII_AD3011_group	0.000108583	4.06725e-05	9.35679e-05	0.000309711	1.35847e-05	9.94912e-05	8.99213e-05	1.45866e-05	0	4.20687e-05	0	0.000307164	8.29864e-05	3.58185e-05	0.000458157	1.64198e-05	0	0.00043019	0	0	4.0662e-05	0.000286993	1.35927e-05	0.000136649	6.76553e-05	0	5.76577e-05	0.000299973	0	0.000833128	0	0	7.36675e-05	1.66931e-05	0	0.000151485	0.000118892	0	9.50781e-05	0.000530966	3.08219e-05	1.53424e-05	0	0.000274234	3.85609e-05	0.00024971	7.21178e-05	2.88721e-05	0.000112221
unclassified_Family_XIII_UCG_001	0	4.06725e-05	0	0	0	0	0	0	0	2.80458e-05	0	0	0.000608567	0	0	0	0	0	0	0	0	0	1.35927e-05	0	0	0	0	0	1.57699e-05	1.36578e-05	0	6.23101e-05	0	0	0	0	0	0	7.92318e-05	0.000231447	3.08219e-05	0	0	1.44333e-05	0	0.000279088	0	0	0.000280552
unclassified_Fenollaria	0.000124094	0	0	0	0	0	0	0	4.21484e-05	0	0	0	5.53243e-05	0	0.000114539	0	0	0	0	0	4.0662e-05	0	0	0	0.000148842	0	0.000720721	2.72702e-05	0	0	0	0	0	0	0	1.68316e-05	0	0	0	0.00871329	0	0	0	0	1.92805e-05	2.93776e-05	0.000375013	1.44361e-05	0
unclassified_Flavonifractor	0	6.77874e-05	8.0201e-05	0.000366022	0	5.68521e-05	7.49344e-05	0.000291732	0.0014752	0.000126206	4.20775e-05	1.3962e-05	0.000138311	1.79093e-05	0.000200444	0	0	2.96683e-05	0.000181255	1.67935e-05	0.000433728	0.000186546	0.000421373	0.000464608	0.00204319	0	4.32432e-05	0.00103627	1.57699e-05	5.46314e-05	1.43664e-05	0.000280396	1.84169e-05	0	0	0.000151485	0	0	0	0.00137507	0	1.53424e-05	0	1.44333e-05	3.85609e-05	0.00061693	0.000144236	0.000490826	0.00123443
unclassified_Fournierella	0.000403307	0	0	0.00197089	0	0.000511669	0.000344698	0	0	1.40229e-05	0	2.7924e-05	0.000193635	1.79093e-05	0	1.64198e-05	0	0.00317451	0	0	1.3554e-05	0.000229595	1.35927e-05	0.000109319	0	0	1.44144e-05	2.72702e-05	0	0	0	0	0	0	0	1.68316e-05	0.000148615	1.3308e-05	1.58464e-05	0	0	1.53424e-05	0	2.88667e-05	3.85609e-05	0.00135137	1.44236e-05	0	0
unclassified_Fusicatenibacter	0.000217165	0.00292842	0.000628241	0.000605344	0.000108678	0.000710651	0.000779318	0.00166287	0.00102561	0.00172481	0.00112207	0.00166148	0.00349926	0.000591006	0.000672919	3.28396e-05	0	0.00106806	0.00134431	0	0.00119275	0.00044484	0.00114179	0.00204974	0.000703616	0.001038	0.00134054	0.000109081	0.00179777	0.00311399	4.30991e-05	0.000155775	0.000460422	0.00021701	1.59299e-05	0.00267623	0.000282368	0.000918249	0.000301081	0.000558195	0.00016952	0.000429586	3.28682e-05	0.0026413	0.000115683	0.000543486	0.00134139	0.00223759	0.00803782
unclassified_Fusobacterium	0	2.7115e-05	0	0	0	8.52781e-05	2.99738e-05	0	0	2.80458e-05	0	0	0	0	0	0	1.72052e-05	1.48342e-05	1.51046e-05	0	0.000487944	1.43497e-05	0	0	0	0	0	2.72702e-05	0	0	0	0	0	1.66931e-05	0	3.36632e-05	0	0	0	1.36145e-05	3.08219e-05	4.60271e-05	0	0	0	0	0	1.44361e-05	0
unclassified_GCA_900066575	0.000186142	5.42299e-05	2.67337e-05	0.000464566	1.35847e-05	0.00014213	0.000104908	0.000510532	1.40495e-05	0.000434709	0	0.000195468	0.000968175	0.000179093	5.72697e-05	8.20991e-05	1.72052e-05	0.000341186	3.02092e-05	0.000117554	4.0662e-05	0.000272644	0.000163112	0.000191309	6.76553e-05	0	0.000288288	0.000122716	3.15398e-05	0.000259499	0	6.23101e-05	5.52507e-05	6.67724e-05	0	0.000134653	4.45845e-05	1.3308e-05	6.33854e-05	9.53016e-05	3.08219e-05	3.06847e-05	6.57365e-05	1.44333e-05	3.85609e-05	7.34441e-05	4.32707e-05	1.44361e-05	0
unclassified_Gluconobacter	0.000217165	4.06725e-05	0	0	5.4339e-05	1.4213e-05	0	1.45866e-05	0	0	0	0	0	0.000161183	0	0.000328396	0.000240873	0	0.000226569	0.000201521	2.7108e-05	5.73987e-05	1.35927e-05	0	5.41243e-05	0.000150435	0	0	0.000315398	0	8.61982e-05	0.000202508	7.36675e-05	0.000250396	0.000223019	3.36632e-05	0.00010403	0	4.75391e-05	0	0.00016952	0.000153424	0.000246512	0.0001299	0.000115683	0	0	0	7.0138e-05
unclassified_Glutamicibacter	0.000108583	1.35575e-05	0.000106935	0	8.15084e-05	4.26391e-05	1.49869e-05	0	4.21484e-05	4.20687e-05	5.61033e-05	1.3962e-05	2.76621e-05	0.000179093	5.72697e-05	0.000197038	0.000275283	8.90049e-05	0.000120837	0.000352663	2.7108e-05	5.73987e-05	1.35927e-05	1.36649e-05	2.70621e-05	0.000135391	2.88288e-05	9.54459e-05	0.000268088	0	0.000143664	0.000202508	0.000423588	0.000350555	0.000111509	0.000218811	7.43075e-05	1.3308e-05	9.50781e-05	2.7229e-05	0.000215753	0.000214793	0.00027938	0.000101033	0.000289207	0	2.88471e-05	2.88721e-05	4.20828e-05
unclassified_Granulicatella	1.55118e-05	2.7115e-05	4.01005e-05	0	0.000176602	4.26391e-05	1.49869e-05	0	0.000351237	1.40229e-05	0.00016831	1.3962e-05	1.38311e-05	0	2.86348e-05	0	0	1.48342e-05	1.51046e-05	0	0.000149094	1.43497e-05	8.15561e-05	0	4.05932e-05	0	0	0.00053177	0	6.82892e-05	0.000100565	3.11551e-05	0.000644591	0	0	0	0	2.66159e-05	3.16927e-05	1.36145e-05	0.00032363	4.60271e-05	1.64341e-05	2.88667e-05	3.85609e-05	5.87553e-05	0.000129812	0	0
unclassified_Haemophilus	0.000806614	0.00340293	0.00076191	1.40778e-05	0	0.000909634	4.49607e-05	0.000189626	4.21484e-05	1.40229e-05	1.40258e-05	5.5848e-05	1.38311e-05	1.79093e-05	0.00121698	0.000131359	6.88208e-05	0.0194327	0.000120837	8.39673e-05	0.000149094	2.86993e-05	0.0170316	9.56546e-05	4.05932e-05	0.000165478	5.76577e-05	2.72702e-05	0.00187662	6.82892e-05	0	0.000638679	0.000349921	1.66931e-05	6.37196e-05	0	5.9446e-05	0.000346007	7.92318e-05	8.16871e-05	0.0019726	0.000705749	0	0.000144333	0.00044345	0.000190955	0.000634637	0.00701592	1.40276e-05
unclassified_Helicobacter	0	5.42299e-05	0.000280704	1.40778e-05	4.07542e-05	1.4213e-05	8.99213e-05	0.000175039	5.61979e-05	4.20687e-05	2.80517e-05	0.000181506	0.000110649	0	0.000214761	0	0	0.000267015	0	1.67935e-05	4.0662e-05	0	2.71854e-05	5.46597e-05	2.70621e-05	1.50435e-05	1.44144e-05	5.45405e-05	0	4.09735e-05	2.87327e-05	1.55775e-05	9.20844e-05	5.00793e-05	0	6.73265e-05	1.48615e-05	5.32318e-05	0	6.80726e-05	1.54109e-05	6.13695e-05	0	1.44333e-05	7.71218e-05	0.000146888	5.76942e-05	0.000129924	0
unclassified_Holdemanella	0	4.06725e-05	8.0201e-05	0.00153448	0.00225507	0.00171978	0.00635444	0	2.8099e-05	4.20687e-05	2.80517e-05	0.00275051	8.29864e-05	1.79093e-05	4.29523e-05	4.92595e-05	6.88208e-05	0.0152198	1.51046e-05	1.67935e-05	0	1.43497e-05	6.79634e-05	0.000177644	0.000108249	0.000165478	0.00472793	9.54459e-05	1.57699e-05	0.00173455	0	0	0.000257836	3.33862e-05	0.000223019	0.0195078	4.45845e-05	1.3308e-05	0	0	7.70547e-05	4.60271e-05	0	1.44333e-05	3.85609e-05	8.81329e-05	0.00755795	1.44361e-05	1.40276e-05
unclassified_Holdemania	1.55118e-05	9.49024e-05	0	7.03888e-05	0	5.68521e-05	4.49607e-05	0.000277146	0	0.000112183	0.000687266	0.000125658	0.000221297	0	1.43174e-05	0	0	7.41708e-05	0	1.67935e-05	9.48779e-05	0.000774882	0.000135927	0.000478273	0.00119073	0	0.000100901	0.000449959	0	0.000109263	0	4.67326e-05	3.68338e-05	0	0	5.04948e-05	0.000133753	0	6.33854e-05	0.00014976	1.54109e-05	3.06847e-05	0	0	3.85609e-05	0.000117511	4.32707e-05	0.000317593	0.000196386
unclassified_Howardella	0	0	0.000133668	0	0	0	0	0	0	0	0	1.3962e-05	0	0.000268639	0.000658601	0	0	0	0	0	0	0	0	0	0	0	0	0	0	0.000751181	0	0	1.84169e-05	0.000133545	0	0	0.00307633	0	0	0	0	1.53424e-05	0	0.00118353	5.78414e-05	0	0	0	0
unclassified_Hungatella	1.55118e-05	0	8.0201e-05	8.44666e-05	2.71695e-05	2.8426e-05	1.49869e-05	2.91732e-05	0.000576029	0.000126206	0.00123427	4.1886e-05	6.91553e-05	0	8.59045e-05	0	0	0	0	0	9.48779e-05	4.3049e-05	2.71854e-05	0.000177644	0.000148842	3.0087e-05	1.44144e-05	0.000136351	0.000173469	0	2.87327e-05	0	1.84169e-05	0	0.000637196	0	7.43075e-05	0	0	0.004874	1.54109e-05	3.06847e-05	1.64341e-05	0.0001299	0.000115683	2.93776e-05	2.88471e-05	1.44361e-05	0.000168331
unclassified_Ilumatobacter	1.55118e-05	0	1.33668e-05	0	1.35847e-05	1.4213e-05	0	0	0	0	0	1.3962e-05	0	0	0	0	0	1.48342e-05	4.53138e-05	0	0	7.17484e-05	0	2.73299e-05	1.35311e-05	1.50435e-05	8.64865e-05	0	1.57699e-05	1.36578e-05	7.18319e-05	1.55775e-05	0.00158385	0	4.77897e-05	0.000875244	0	0	0.000744779	0	7.70547e-05	0.000352874	0	8.66001e-05	0.00175452	0	0	0	0
unclassified_Incertae_Sedis	9.30709e-05	0.000189805	4.01005e-05	0.0017738	5.4339e-05	0.00149237	0.000524541	0.00154618	0.000590078	0	0	0.00142412	0.000221297	7.16371e-05	0.000859045	0	1.72052e-05	0.00189877	0.000166151	0	0.000623484	0.00149237	0.00141364	0.000341623	0.000446525	1.50435e-05	1.44144e-05	0.00055904	3.15398e-05	0.000423393	7.18319e-05	0.000249241	0.000110501	3.33862e-05	1.59299e-05	0.000269306	7.43075e-05	0.000173003	1.58464e-05	0.00155206	0.000123287	3.06847e-05	1.64341e-05	0.0003464	0.000173524	5.87553e-05	0.000764449	1.44361e-05	0.00131859
unclassified_Intestinibacter	0.000434331	0.0012744	0.000441106	7.03888e-05	1.35847e-05	0.00559993	4.49607e-05	0.00405508	7.02474e-05	4.20687e-05	0.000238439	0.00146601	0.000235128	0.00098501	0.00147469	0.000147778	8.60259e-05	0.000326351	6.04184e-05	0.000201521	0.000230418	4.3049e-05	0.00248746	0.000150314	0.00286859	0.000150435	4.32432e-05	2.72702e-05	0.000331168	5.46314e-05	2.87327e-05	1.55775e-05	0.000515673	0.000116852	9.55795e-05	0.000319801	0.00102544	0.000173003	0.000396159	2.7229e-05	0.000200342	0.000352874	9.86047e-05	0.0045465	0.000732657	0.00402474	0.00862529	0.00792539	0.000533049
unclassified_Intestinimonas	3.10236e-05	1.35575e-05	5.34674e-05	0.000140778	0	1.4213e-05	4.49607e-05	1.45866e-05	0	0	0	2.7924e-05	1.38311e-05	7.16371e-05	0.000171809	4.92595e-05	0	4.45025e-05	0	0	0	1.43497e-05	0	0.000122984	0	0	0.000115315	0	0	6.82892e-05	0	0	0	0	0	0.00010099	5.9446e-05	0	0	0	1.54109e-05	0	1.64341e-05	0	9.64023e-05	4.40665e-05	2.88471e-05	2.88721e-05	0
unclassified_Intrasporangiaceae	6.20472e-05	1.35575e-05	1.33668e-05	0	9.50932e-05	1.4213e-05	0	0	1.40495e-05	0	0	0	0	0.000161183	0	0.000180618	6.88208e-05	2.96683e-05	0.000181255	0.000218315	0	1.43497e-05	0	2.73299e-05	0	4.51304e-05	0	1.36351e-05	4.73097e-05	0	0.000114931	4.67326e-05	0.000257836	0.000317169	0.000207089	0.000168316	4.45845e-05	0	9.50781e-05	1.36145e-05	7.70547e-05	9.20542e-05	0.000312248	0.000101033	0.000212085	0	1.44236e-05	1.44361e-05	2.80552e-05
unclassified_Isoptericola	0.000155118	4.06725e-05	1.33668e-05	4.22333e-05	0.000135847	0.000113704	1.49869e-05	0	0	2.80458e-05	0	0	0	0.000626825	0	0.000492595	0.000395719	5.93366e-05	0.000332301	0.000470217	2.7108e-05	0.000129147	0	9.56546e-05	4.05932e-05	0.000330956	5.76577e-05	0	0.000346937	0	0.000258595	0.000327128	0.000313087	0.000450714	0.000398248	0.000168316	8.91689e-05	1.3308e-05	7.92318e-05	0	0.000477739	0.000245478	0.000443721	0.000202067	0.000173524	1.46888e-05	0	0	7.0138e-05
unclassified_Klebsiella	0.00781795	0.00437907	0.077541	0.000337866	0.0242216	0.00744763	0.0627201	0.00735165	0.020442	0.0293219	0.00116414	0.256845	0.00210232	0.0103336	0.00750233	0.0101803	0.0108393	0.0714858	0.00779397	0.0104623	0.00279212	0.0633395	0.00035341	0.00721509	0.00211085	0.00794296	0.00268108	0.103627	0.00887845	0.0261138	0.00461161	0.00853649	0.00515673	0.0118688	0.0104182	0.00427523	0.0112204	0.0209467	0.0671727	0.000258676	0.00921574	0.00581476	0.0108301	0.00894868	0.00854124	0.00301121	0.0249672	0.00054857	0.00276344
unclassified_Kocuria	0.00305583	0.000366052	8.0201e-05	5.63111e-05	0.0014264	0.000852781	1.49869e-05	4.37598e-05	4.21484e-05	0	1.40258e-05	2.7924e-05	2.76621e-05	0.00601752	1.43174e-05	0.00505731	0.00528199	0.000326351	0.0039423	0.00544108	0.00027108	0.00134887	2.71854e-05	0.000300629	0.000202966	0.00437765	0.000562162	0	0.00405286	1.36578e-05	0.00298821	0.00384765	0.00134443	0.00525833	0.00520908	0.00122871	0.00190227	1.3308e-05	0.000776471	2.7229e-05	0.0032363	0.00164163	0.00535752	0.00140003	0.00150388	1.46888e-05	0	0	0.000617215
unclassified_Kosakonia	0.0325283	0.00343004	0.00284714	0.000408255	0.00551541	0.010205	0.00112402	0.000495945	0.0014471	0.000518847	0.000378698	0.000335088	0.00012448	0.0612139	0.000257714	0.0522643	0.0590482	0.00338219	0.0404199	0.0558886	0.0025346	0.0130295	0.00035341	0.00400383	0.00171845	0.0378494	0.00701982	0.00102263	0.0455434	0.000286815	0.0191216	0.0436638	0.0101661	0.0560387	0.0522023	0.00602572	0.0194388	0.000758554	0.00450036	0.000326748	0.0388972	0.0177051	0.0548407	0.0252872	0.0105464	0.000396598	0.000259624	0.000173233	0.00364718
unclassified_Lachnoclostridium	0.000791102	0.0020743	0.00981126	0.000774277	0.00434712	0.000511669	0.00137879	0.00227551	0.00195288	0.00053287	0.0279535	0.00273655	0.000843695	0.00102083	0.00104517	0.000689633	0.000447335	0.0017356	0.000513556	0.000419836	0.00761734	0.00132017	0.00418655	0.00750205	0.00235441	0.000556609	0.00595315	0.0167167	0.0030909	0.00357836	0.00182453	0.00216528	0.00114185	0.003155	0.000637196	0.000572275	0.000222922	0.000106464	0.0373023	0.00303604	0.00135616	0.00293039	0.000690233	0.000274234	0.00923534	0.00226208	0.00125485	0.00187669	0.00339468
unclassified_Lachnospira	0.000899685	0.0172722	0.000227236	0.00318158	0.000393958	0.00380909	0.000869239	0.00776008	0.000168594	0.0131535	0.00862589	0.0113232	0.000497918	0.000268639	0.00127425	9.85189e-05	5.16156e-05	0.00100872	0.00237142	0.000117554	0.00569268	0.00954253	0.00316709	0.000327958	0.0440301	0.000150435	0.00518919	0.00141805	0.00113543	0.00707476	1.43664e-05	0.00113716	0.00088401	0.000434021	3.18598e-05	0.000774254	0.000460706	0.00838401	0.000412005	0.00386652	9.24656e-05	0.000920542	0	0.0045032	0.000212085	0.0119567	0.00389436	0.0154466	0.00206206
unclassified_Lachnospiraceae	0.00631331	0.00558568	0.0144629	0.0259594	0.0101614	0.00876944	0.0134133	0.00921874	0.0232097	0.0102367	0.0468182	0.0121888	0.00789754	0.00311621	0.0114683	0.000591114	0.000361309	0.0160357	0.00444075	0.000470217	0.0174847	0.0186259	0.00622545	0.00899153	0.0479406	0.00145922	0.0176	0.0146714	0.000315398	0.0169494	0.000574655	0.00255472	0.0041438	0.00151907	0.000525687	0.00568909	0.0060189	0.0106064	0.00373974	0.00705232	0.00306678	0.00289971	0.000328682	0.00223717	0.00435738	0.0163046	0.0132985	0.0120397	0.00694367
unclassified_Lachnospiraceae_ND3007_group	6.20472e-05	0.00132863	0.000441106	0.00554664	6.79237e-05	0.00137866	0.000404646	0.00100648	0	0.00175286	0.00084155	0.00034905	0.000110649	0.000143274	5.72697e-05	1.64198e-05	1.72052e-05	0.00212128	0.000830753	0	0.0032394	0.00312823	0.00379236	0.000191309	0.00174551	0	0.000172973	0.0027543	1.57699e-05	0.00230818	1.43664e-05	0.00160449	0.000257836	0.000984893	3.18598e-05	5.04948e-05	7.43075e-05	5.32318e-05	0.000110924	0.000517352	0.000292808	0.000490956	1.64341e-05	0.000274234	0.000154244	0.000734441	0.000158659	0.00153022	0.00070138
unclassified_Lachnospiraceae_NK4A136_group	0.000139606	6.77874e-05	0.000120302	0.00136554	8.15084e-05	0.000227408	0.000329712	7.29331e-05	1.40495e-05	0.000238389	8.4155e-05	0.000376974	8.29864e-05	0.000573097	0.000472475	0.000426915	0.000309693	0.000934552	0.000135941	0.000587771	5.4216e-05	5.73987e-05	8.15561e-05	8.19896e-05	4.05932e-05	6.01739e-05	0.00273874	0	0.000173469	4.09735e-05	0.000143664	9.34652e-05	0.000221003	0.000417327	0.000127439	0.000218811	4.45845e-05	0	7.92318e-05	2.7229e-05	0.000138698	6.13695e-05	0.000394419	5.77334e-05	0.000269926	0.000102822	0.000173083	0.000101052	0
unclassified_Lachnospiraceae_UCG_003	0.00172181	0.000338937	8.0201e-05	0.000985444	0	0	0.00319221	0.000408425	0	0.000238389	0	0.000600366	1.38311e-05	0	2.86348e-05	0	0	0	0	0	0	0	0.00163112	0.000847226	0	0	1.44144e-05	0	0	0	0	0	0	0	0	3.36632e-05	0	0	0	6.80726e-05	0.000246575	1.53424e-05	0	0.000144333	0	7.34441e-05	0.000389436	0.00625081	0
unclassified_Lachnospiraceae_UCG_004	1.55118e-05	9.49024e-05	2.67337e-05	0.000478644	5.4339e-05	0.000113704	2.99738e-05	0.000306319	0.000224792	0.000434709	0.000813498	0.000167544	0.000179804	1.79093e-05	0.000100222	1.64198e-05	0	0.000296683	0.000800544	0	0	8.6098e-05	0.000421373	5.46597e-05	0.00772624	0.000285826	5.76577e-05	0.00548132	9.46193e-05	0.00426125	4.30991e-05	7.78877e-05	9.20844e-05	1.66931e-05	0	0.000134653	1.48615e-05	2.66159e-05	0.000221849	0.000925787	0	1.53424e-05	0	1.44333e-05	5.78414e-05	0.00036722	2.88471e-05	4.33082e-05	9.81932e-05
unclassified_Lachnospiraceae_UCG_010	0.000186142	0.000149132	5.34674e-05	0.00157671	0	0.00014213	0.000554515	0.000204213	0.000252891	0.000897465	0.000575059	0.000335088	0.00114798	1.79093e-05	1.43174e-05	3.28396e-05	3.44104e-05	0.00155759	1.51046e-05	1.67935e-05	0.000121986	0.00510848	0.000135927	0.00117518	9.47175e-05	0	0.00184505	0.00332697	1.57699e-05	0.00133847	7.18319e-05	0.000716567	0.000184169	1.66931e-05	1.59299e-05	0.000117821	4.45845e-05	0	0.000237695	0.00209664	1.54109e-05	4.60271e-05	0	2.88667e-05	3.85609e-05	0.000528797	7.21178e-05	0.000274285	0.000504994
unclassified_Lacticaseibacillus	0.00637535	0.00113883	0.000213869	0.000225244	0.00444221	0.00275733	7.49344e-05	7.29331e-05	5.61979e-05	2.80458e-05	9.81808e-05	5.5848e-05	4.14932e-05	0.00979637	8.59045e-05	0.00950708	0.00904993	0.00151308	0.00800544	0.00891733	0.00109787	0.00345827	5.43707e-05	0.0013255	0.000933644	0.00833409	0.00256577	0.000163621	0.0086419	4.09735e-05	0.00759981	0.00732144	0.0119341	0.00873049	0.00898447	0.00732175	0.00453275	1.3308e-05	0.00591069	0.000136145	0.00701197	0.00730297	0.00923598	0.0052393	0.0114333	7.34441e-05	1.44236e-05	2.88721e-05	0.00242678
unclassified_Lactiplantibacillus	0.00890378	0.00124729	0.000200503	0.000211166	0.00680596	0.00341113	8.99213e-05	0.000102106	5.61979e-05	9.81602e-05	0.000140258	1.3962e-05	4.14932e-05	0.0105665	0.000100222	0.0142196	0.0135233	0.00179493	0.011404	0.0137706	0.00120631	0.00492194	0.000122334	0.00162613	0.00108249	0.0120348	0.00292613	9.54459e-05	0.011859	0.000150236	0.0118666	0.0104369	0.0104055	0.0125866	0.0131103	0.00717027	0.0067917	7.98478e-05	0.00581561	0.000163374	0.0094469	0.00805474	0.0130816	0.00590324	0.0115876	0.000102822	8.65414e-05	8.66163e-05	0.00293177
unclassified_Lactobacillaceae	0.000806614	2.7115e-05	1.33668e-05	1.40778e-05	0.000176602	0.000170556	1.49869e-05	1.45866e-05	0	0	0	0	0	0.00216702	0	0.00116581	0.00201301	5.93366e-05	0.000906276	0.00186407	4.0662e-05	0.000243944	1.35927e-05	2.73299e-05	1.35311e-05	0.000947739	0.00012973	0	0.00123005	1.36578e-05	0.000488457	0.000856765	0.000976095	0.00156915	0.00125846	0.00062277	0.00029723	0	0.000380312	0	0.00101712	0.000444929	0.00154481	0.000360834	0.000983303	1.46888e-05	0	0	8.41656e-05
unclassified_Lactobacillus	0.137078	0.0233595	0.00954392	0.0030408	0.0990464	0.0538816	0.00145373	0.00186709	0.00081487	0.000813327	0.00176726	0.00125658	0.00141077	0.227609	0.00199012	0.197136	0.198926	0.0305139	0.171785	0.199506	0.0203988	0.081047	0.00289524	0.0297622	0.01893	0.166321	0.0577153	0.00177257	0.179004	0.00333251	0.163446	0.166742	0.199326	0.18768	0.198391	0.137312	0.102143	0.00176996	0.119577	0.00193326	0.148438	0.157044	0.197407	0.125743	0.210928	0.00126324	0.000533672	0.000649622	0.0538099
unclassified_Lactococcus	0.000496378	4.06725e-05	6.68342e-05	2.81555e-05	0.000298864	0.000127917	1.49869e-05	2.91732e-05	0.000702474	0	2.80517e-05	0	0	0.000447732	0.000200444	0.000706052	0.000671002	0.000237346	0.000453138	0.000890053	8.1324e-05	0.000286993	0	0.000136649	2.70621e-05	0.000601739	5.76577e-05	0	0.000551946	0.000218525	0.000545922	0.000498481	0.000442005	0.000651031	0.000637196	0.000269306	0.000356676	0	0.000285234	0	0.000446917	0.000368217	0.000723101	0.000230934	0.000482011	4.40665e-05	0	0	0.000154304
unclassified_Lapidilactobacillus	0.000155118	2.7115e-05	0	1.40778e-05	5.4339e-05	7.10651e-05	0	0	0	0	0	0	0	0.000179093	0	0.000229878	0.000292488	1.48342e-05	0.000241674	0.000117554	2.7108e-05	0.000157846	0	4.09948e-05	1.35311e-05	0.000240696	4.32432e-05	0	0.000157699	0	0.000258595	0.000218086	0.000110501	0.000250396	0.000175229	0.00010099	0.000118892	2.66159e-05	6.33854e-05	0	0.000200342	0.000138081	0.000262946	5.77334e-05	5.78414e-05	0	0	0	7.0138e-05
unclassified_Latilactobacillus	0.00184591	0.000284707	2.67337e-05	7.03888e-05	0.00154866	0.000767503	2.99738e-05	2.91732e-05	0	4.20687e-05	0	0	0	0.0029013	0	0.00290631	0.00290768	0.000563698	0.00283966	0.0033419	0.000352404	0.00137757	1.35927e-05	0.000423613	0.000324746	0.00251226	0.000836036	1.36351e-05	0.00269665	1.36578e-05	0.00245665	0.00249241	0.00348079	0.00270428	0.00317005	0.00203663	0.00164963	3.99239e-05	0.00179064	4.08436e-05	0.00195719	0.00217862	0.00343473	0.00152993	0.00381753	1.46888e-05	0	4.33082e-05	0.00102402
unclassified_Lentilactobacillus	0.0110909	0.00223698	0.00029407	0.000366022	0.00900668	0.00474715	0.000104908	0.000145866	4.21484e-05	0.000112183	4.20775e-05	1.3962e-05	6.91553e-05	0.016978	0.000100222	0.0179797	0.0172224	0.00286299	0.015739	0.0177171	0.00193822	0.00786362	0.000244668	0.00274665	0.00162373	0.0160815	0.00563604	0.000204527	0.0159591	0.00019121	0.0167512	0.0136615	0.0239788	0.0163092	0.0177618	0.0159732	0.0095708	0.000106464	0.0138022	0.000204218	0.0137311	0.014744	0.0180611	0.0107384	0.0242355	0.000146888	2.88471e-05	8.66163e-05	0.00471328
unclassified_Leuconostoc	0.0135883	0.00183026	0.000387638	0.000351944	0.00862631	0.00517354	0.000179843	7.29331e-05	8.42969e-05	2.80458e-05	0.000112207	1.3962e-05	1.38311e-05	0.0116589	0.00038657	0.0244984	0.0241217	0.00221029	0.0181406	0.0243841	0.00139606	0.0065004	0.000244668	0.00230937	0.00102836	0.0181424	0.00432432	0.000149986	0.0202958	0.000641919	0.0172109	0.0183971	0.0185458	0.0171605	0.0234648	0.0120514	0.00931815	0.000292775	0.0093335	0.000204218	0.0168287	0.0137314	0.0249141	0.0105075	0.0198974	0.000102822	2.88471e-05	5.77442e-05	0.00403995
unclassified_Levilactobacillus	0.00662354	0.00107104	9.35679e-05	0.000140778	0.00528446	0.00244464	5.99475e-05	1.45866e-05	2.8099e-05	4.20687e-05	2.80517e-05	1.3962e-05	2.76621e-05	0.00872182	7.15871e-05	0.0105579	0.0101683	0.00146858	0.00928933	0.0107982	0.00121986	0.00416141	4.0778e-05	0.00135283	0.000798333	0.00886061	0.00243604	0.000109081	0.00854728	8.19471e-05	0.00859109	0.00848976	0.00994512	0.00988231	0.00951016	0.00669898	0.00511235	7.98478e-05	0.00534022	6.80726e-05	0.0074743	0.00676598	0.0107479	0.00534034	0.0107007	5.87553e-05	1.44236e-05	1.44361e-05	0.00245483
unclassified_Ligilactobacillus	0.000372283	0.000122017	0.000414372	1.40778e-05	0.000163017	4.26391e-05	7.49344e-05	4.37598e-05	8.42969e-05	0.000168275	0.000140258	2.7924e-05	0.000138311	0.000197002	0.000143174	0.000279137	0.000120436	0.000815878	0.000211464	0.000201521	1.3554e-05	8.6098e-05	4.0778e-05	5.46597e-05	2.70621e-05	0.000210609	0.000100901	4.09054e-05	0.000362707	0.000109263	0.000143664	0.000280396	0.000718258	0.000233703	0.000350458	0.000555443	0.000133753	1.3308e-05	0.000285234	2.7229e-05	0.000354451	0.000337532	0.000213644	0.000144333	0.00123395	4.40665e-05	8.65414e-05	1.44361e-05	2.80552e-05
unclassified_Limosilactobacillus	0.0114012	0.00155911	0.00029407	0.000183011	0.00787915	0.0044771	0.00019483	0.000116693	0.00026694	0.000210343	2.80517e-05	0.000223392	0.000152142	0.014811	0.000128857	0.0188828	0.0198892	0.00209162	0.0151952	0.0182881	0.0016807	0.0065291	0.000176705	0.00222738	0.00101483	0.0152842	0.00338739	0.000409054	0.0169369	0.000163894	0.0140359	0.0144092	0.00998195	0.0161756	0.0170131	0.00604255	0.00811437	0.000226235	0.00518176	0.000163374	0.0133459	0.00754844	0.018702	0.00922291	0.00944742	0.000264399	2.88471e-05	0.000129924	0.00446078
unclassified_Loigolactobacillus	0.00305583	0.000474512	9.35679e-05	7.03888e-05	0.00215997	0.00120811	2.99738e-05	1.45866e-05	0	1.40229e-05	2.80517e-05	1.3962e-05	0	0.00363558	2.86348e-05	0.00494237	0.00443894	0.000682371	0.00368552	0.00441668	0.00054216	0.00189416	2.71854e-05	0.000546597	0.000297683	0.00367061	0.000951351	5.45405e-05	0.00381631	6.82892e-05	0.0033761	0.00439287	0.00434638	0.00390618	0.00430108	0.00306335	0.00234812	3.99239e-05	0.00244034	2.7229e-05	0.00346746	0.00320655	0.00447008	0.002598	0.00431882	4.40665e-05	0	1.44361e-05	0.00099596
unclassified_Luteimonas	0.000186142	4.06725e-05	1.33668e-05	0	5.4339e-05	0	0	0	0	0	0	0	0	8.95464e-05	0	0.000328396	0.000292488	0	0.000286987	0.000403043	1.3554e-05	4.3049e-05	0	0	0	0.000225652	0	0	0.000157699	0	0.000129297	0.000155775	7.36675e-05	0.000250396	0.000270808	1.68316e-05	0.000118892	0	1.58464e-05	0	0.000246575	0.000138081	0.000180775	0.000187634	3.85609e-05	0	0	0	2.80552e-05
unclassified_Lysobacter	0.000480866	2.7115e-05	0	0	0.000244525	9.94912e-05	0	0	0	1.40229e-05	0	0	0	0.000465641	0	0.000985189	0.000688208	1.48342e-05	0.000589079	0.00087326	4.0662e-05	0.000243944	1.35927e-05	6.83247e-05	0	0.000541565	0.000115315	0	0.000646565	0	0.000430991	0.000732144	0.000147335	0.00103497	0.000812425	0.000117821	0.000386399	0	9.50781e-05	1.36145e-05	0.000678081	0.000168766	0.000772404	0.0002165	0.000212085	1.46888e-05	0	0	2.80552e-05
unclassified_Macrococcus	0.00051189	6.77874e-05	0	1.40778e-05	0.000326034	0.000127917	0	0	1.40495e-05	0	1.40258e-05	0	0	0.00050146	1.43174e-05	0.000820991	0.000653797	2.96683e-05	0.000528661	0.000654945	1.3554e-05	0.000344392	1.35927e-05	0.000122984	1.35311e-05	0.000752174	8.64865e-05	0	0.000709645	0	0.000545922	0.000638679	0.000165752	0.000751189	0.000716846	1.68316e-05	0.000371537	0	1.58464e-05	0	0.000523972	0.000122739	0.000805272	0.000360834	0.000173524	0	0	0	9.81932e-05
unclassified_Marvinbryantia	4.65354e-05	9.49024e-05	2.67337e-05	0.000168933	0	0.00075329	0.000374672	0.000102106	5.61979e-05	1.40229e-05	5.61033e-05	0.00013962	0	3.58185e-05	0.000100222	0	0	0.000400522	0	1.67935e-05	5.4216e-05	1.43497e-05	5.43707e-05	0.000109319	8.11864e-05	1.50435e-05	0.000100901	4.09054e-05	0	8.19471e-05	0	3.11551e-05	1.84169e-05	5.00793e-05	0	6.73265e-05	0.00029723	0	1.58464e-05	2.7229e-05	0.00016952	4.60271e-05	0	0.000158767	5.78414e-05	0.000235021	4.32707e-05	0.000346465	0
unclassified_Massilia	0.000263701	4.06725e-05	0.000147035	0	5.4339e-05	9.94912e-05	1.49869e-05	0	0	0	1.40258e-05	0	1.38311e-05	0.00025073	2.86348e-05	0.000706052	0.000636592	7.41708e-05	0.00055887	0.000755706	6.777e-05	0.000114797	0.000108741	2.73299e-05	5.41243e-05	0.000451304	8.64865e-05	4.09054e-05	0.000520406	5.46314e-05	0.000344793	0.000529636	0.00058934	0.000600952	0.000716846	0.000302969	0.000193199	5.32318e-05	0.000269388	6.80726e-05	0.000585615	0.000383559	0.000706667	0.000230934	0.000655535	1.46888e-05	0	0	4.20828e-05
unclassified_Megamonas	0.000480866	0.0969225	0.29113	0.0410789	0.000176602	0.000113704	0.000164856	4.37598e-05	2.8099e-05	0.000112183	0.000406749	0.000404898	0.000359608	0.000214911	0.0024626	0.000197038	5.16156e-05	0.000489527	3.02092e-05	0.00038625	9.48779e-05	1.43497e-05	0.000312632	0.000532932	0.000487118	0.0109517	0.195157	0.120262	0.000457327	0.000928733	0.00103438	0.00116832	0.00103135	0.000100159	7.96495e-05	0.000117821	2.9723e-05	0.000239543	6.33854e-05	9.53016e-05	0.0249965	0.0956136	4.93024e-05	0.000158767	0.000134963	0.0260727	8.65414e-05	0.000101052	5.61104e-05
unclassified_Megasphaera	0	0	1.33668e-05	0	1.35847e-05	1.4213e-05	4.49607e-05	0	4.21484e-05	4.20687e-05	4.20775e-05	0.000111696	1.38311e-05	0	5.72697e-05	1.64198e-05	0	0.000296683	0	0	0	0	0	0	0	3.0087e-05	0	1.36351e-05	0	0.00142042	0.000804517	0.00133967	0.0017496	1.66931e-05	0	1.68316e-05	0	0	1.58464e-05	0.0075016	1.54109e-05	3.06847e-05	0	1.44333e-05	0.000173524	8.81329e-05	7.21178e-05	7.21803e-05	0
unclassified_Mesotoga	0.000108583	5.42299e-05	0	0	0.000203771	4.26391e-05	0	0	0	0	0	0	0	0.000465641	0	0.00146136	0.00115275	5.93366e-05	0.000226569	0.00147782	0	5.73987e-05	1.35927e-05	4.09948e-05	1.35311e-05	0.000210609	1.44144e-05	1.36351e-05	0.000205009	1.36578e-05	2.87327e-05	3.11551e-05	0	0.00105167	0.000254879	5.04948e-05	7.43075e-05	0	0	0	9.24656e-05	4.60271e-05	0.000953179	4.33e-05	0	0	0	0	2.80552e-05
unclassified_Methylobacterium_Methylorubrum	0.00162874	0.000176247	2.67337e-05	2.81555e-05	0.000597729	0.000497456	7.49344e-05	1.45866e-05	1.40495e-05	0	0	0	0	0.00189838	0	0.00270927	0.00292488	0.00017801	0.00205423	0.00280451	0.00020331	0.000602686	2.71854e-05	0.000204974	0.000108249	0.00212113	0.000691892	1.36351e-05	0.00231817	1.36578e-05	0.00165213	0.00227432	0.00235736	0.00285452	0.00291517	0.00166633	0.000832243	0	0.00120432	1.36145e-05	0.0019726	0.00200985	0.00294171	0.00132787	0.0026607	2.93776e-05	1.44236e-05	0	0.000280552
unclassified_Methylophilus	0.00017063	8.13449e-05	0.000307437	0.000197089	0.000149432	9.94912e-05	1.49869e-05	0	5.61979e-05	1.40229e-05	2.80517e-05	0	0	8.95464e-05	0	0.000344816	0.000223667	0.000207678	0.000166151	8.39673e-05	8.1324e-05	2.86993e-05	6.79634e-05	0.000150314	8.11864e-05	6.01739e-05	5.76577e-05	9.54459e-05	7.88494e-05	2.73157e-05	5.74655e-05	0.00012462	0.000147335	0.000100159	0.000127439	1.68316e-05	0.000148615	3.99239e-05	0.000110924	8.16871e-05	0.000138698	0.000199451	0.000197209	4.33e-05	0.000134963	1.46888e-05	2.88471e-05	0	4.20828e-05
unclassified_Microbacteriaceae	0.000232677	0	8.0201e-05	1.40778e-05	5.4339e-05	5.68521e-05	0	0	2.8099e-05	0	0	0	0	0.000304458	1.43174e-05	0.000443335	0.000395719	2.96683e-05	0.000241674	0.00043663	4.0662e-05	0.000114797	0	4.09948e-05	4.05932e-05	0.000240696	4.32432e-05	2.72702e-05	0.000346937	0	0.000287327	0.00018693	0.000423588	0.000333862	0.000350458	0.000302969	0.000118892	0	0.000158464	0	0.000292808	0.000199451	0.000427287	8.66001e-05	0.000308487	0	0	0	5.61104e-05
unclassified_Microbacterium	0.0014426	0.000203362	9.35679e-05	0.000140778	0.0011547	0.00061116	0.000104908	0	2.8099e-05	4.20687e-05	0	0	1.38311e-05	0.000841736	0	0.00280779	0.00302811	0.000103839	0.00240163	0.00278771	0.000189756	0.00086098	4.0778e-05	0.000177644	8.11864e-05	0.00165478	0.000345946	1.36351e-05	0.00231817	2.73157e-05	0.00201129	0.00216528	0.00145493	0.00126868	0.00307447	0.00072376	0.00111461	2.66159e-05	0.000554622	0	0.00208048	0.00122739	0.00325396	0.00109693	0.00136891	0	4.32707e-05	0	0.000406801
unclassified_Mitochondria	0.00680969	0.000582972	0.000147035	4.22333e-05	0.00256752	0.00149237	0.00019483	7.29331e-05	0.000182643	0.00566525	0.000126233	2.7924e-05	0.000110649	0.00816663	0.000128857	0.0112476	0.0108393	0.000771376	0.00750699	0.0109661	0.000623484	0.0023103	9.51488e-05	0.000778901	0.00063596	0.00722087	0.00165766	2.72702e-05	0.0081688	8.19471e-05	0.00543049	0.00808474	0.00681425	0.0100826	0.0105775	0.00417424	0.00371537	9.31557e-05	0.00291573	5.44581e-05	0.00679622	0.00509367	0.0103699	0.00427227	0.00715305	7.34441e-05	8.65414e-05	0.000101052	0.00124846
unclassified_Monoglobus	1.55118e-05	0.00477223	4.01005e-05	0.000323789	1.35847e-05	0	0.000329712	1.45866e-05	1.40495e-05	1.40229e-05	0	0.00212222	0	0.000125365	0	0	1.72052e-05	0.000504361	0	0	0	2.86993e-05	0.0111052	0.00351189	1.35311e-05	1.50435e-05	0.000778378	1.36351e-05	0	0.000300473	0	0	3.68338e-05	0	0	0.000774254	5.9446e-05	2.66159e-05	1.58464e-05	0.000462894	1.54109e-05	1.53424e-05	0	0	0	5.87553e-05	0.00236546	5.77442e-05	0
unclassified_Muribaculaceae	0.000217165	0.000149132	0.000454473	0	0.000149432	0.000127917	1.49869e-05	5.83465e-05	4.21484e-05	4.20687e-05	0.00180933	2.7924e-05	8.29864e-05	0.000322367	0.021247	0.000788151	0.000602182	0.000207678	0.000226569	0.000822879	6.777e-05	5.73987e-05	0.000135927	9.56546e-05	4.05932e-05	0.000992869	0.00138378	0.112817	0.000441557	0.00513535	0.00015803	0.00143313	0.000128918	0.000884734	0.000334528	0.00010099	0.0179527	0.000119772	0.000158464	8.16871e-05	0.00223459	0.000168766	0.000788838	0.000101033	0.000192805	0	0.00539441	0.000115488	8.41656e-05
unclassified_NK4A214_group	0.000791102	0.000366052	0.00025397	0.00439226	9.50932e-05	0.010006	0.00130386	0.00255266	0.00588673	0.000154252	0.000224413	0.0128171	0.00442594	0.000573097	0.00176104	9.85189e-05	6.88208e-05	0.00436124	1.51046e-05	0.000100761	0.00121986	0.00193721	0.000475744	0.00714676	0.00266562	0.000225652	0.00262342	9.54459e-05	9.46193e-05	0.0445792	5.74655e-05	0.000420594	0.00182327	0.000233703	0.000207089	0.00346731	0.00493401	5.32318e-05	0.000221849	0.000326748	4.62328e-05	0.000429586	3.28682e-05	0.000274234	0.000925462	0.00229146	0.001226	0.00109714	0.00035069
unclassified_Negativibacillus	6.20472e-05	0	0.000387638	0.000422333	0	0.00127917	1.49869e-05	0	0.00532475	5.60915e-05	0	6.981e-05	0.000290452	1.79093e-05	0	0	0	0.000267015	0	1.67935e-05	2.7108e-05	0.00961428	2.71854e-05	0.000218639	1.35311e-05	0	0.000144144	0.00325879	0	0.000355104	5.74655e-05	0.000358283	0.00215478	5.00793e-05	0	0.000471285	0.000148615	0	3.16927e-05	1.36145e-05	4.62328e-05	0	0	8.66001e-05	1.92805e-05	0.000161577	0.000504825	1.44361e-05	0.0010661
unclassified_Neisseria	4.65354e-05	0	1.33668e-05	2.81555e-05	0	2.8426e-05	0	0	0	0	1.40258e-05	0	0	0	1.43174e-05	6.56793e-05	0	1.48342e-05	0	0	0	0	0	0	0	0	0	0	0	0	0	0	3.68338e-05	0	3.18598e-05	0	0	1.3308e-05	0	0	0	3.06847e-05	3.28682e-05	1.44333e-05	0	0	0	0	0
unclassified_Nitrospira	6.20472e-05	0	1.33668e-05	0	0	2.8426e-05	1.49869e-05	1.45866e-05	0	0	0	0	0	1.79093e-05	0	1.64198e-05	0	0	0	0	0	1.43497e-05	0	2.73299e-05	0	3.0087e-05	7.20721e-05	4.09054e-05	1.57699e-05	0	2.87327e-05	0	0.00125235	3.33862e-05	0	0.000858412	5.9446e-05	0	0.000602161	1.36145e-05	3.08219e-05	0.00026082	0	7.21667e-05	0.00156172	0	0	0	1.40276e-05
unclassified_Nostocaceae	4.65354e-05	0	0.000147035	0	0.000122263	4.26391e-05	7.49344e-05	0	1.40495e-05	0.000967579	4.20775e-05	0	1.38311e-05	0.000125365	1.43174e-05	0.000180618	0.000103231	1.48342e-05	0.000135941	0.000268695	4.0662e-05	1.43497e-05	1.35927e-05	4.09948e-05	0.000906582	0.000150435	0	0	0.000410017	5.46314e-05	2.87327e-05	0.000171353	0.000110501	0.000133545	0.000143369	3.36632e-05	5.9446e-05	0	4.75391e-05	0	7.70547e-05	9.20542e-05	0.000197209	4.33e-05	3.85609e-05	2.93776e-05	2.88471e-05	2.88721e-05	1.40276e-05
unclassified_Novosphingobium	0.000263701	5.42299e-05	0.000200503	7.03888e-05	0.000163017	5.68521e-05	0	1.45866e-05	1.40495e-05	0	1.40258e-05	1.3962e-05	0	0.000376095	1.43174e-05	0.000541854	0.000584976	8.90049e-05	0.000286987	0.000587771	8.1324e-05	0.000114797	0.000122334	0.000177644	0.000108249	0.000165478	0.000158559	0.000177257	0.000457327	0.000150236	0.000215496	0.00018693	0.000497256	0.000534179	0.000302668	0.000504948	0.000148615	7.98478e-05	0.000285234	6.80726e-05	0.000184931	0.00026082	0.000690233	0.0001732	0.000482011	7.34441e-05	0	0	7.0138e-05
unclassified_Oscillibacter	3.10236e-05	1.35575e-05	2.67337e-05	2.81555e-05	0	0	7.49344e-05	0.000408425	0.000857018	0	0	0	0.000221297	5.37278e-05	1.43174e-05	0	0	1.48342e-05	0	0	0	0.000100448	1.35927e-05	0.000177644	0.000270621	0	0	0.000163621	0	0.000204868	0	0.00012462	0	0	0	0	7.43075e-05	0	1.58464e-05	6.80726e-05	0	0	0	1.44333e-05	0	0.000117511	1.44236e-05	1.44361e-05	7.0138e-05
unclassified_Oscillospira	0	0	0	1.40778e-05	0	0	0	0	0	0	0	2.7924e-05	0	0	0	0	0	0	0	0	0	0	0	0	0	0	0	0	0	8.19471e-05	0	0	0	0	0	0	1.48615e-05	0	0	0	0	0	0	0	0	0	0	0	0
unclassified_Oscillospiraceae	0.00034126	0.000257592	0.000374272	0.000323789	4.07542e-05	0.00046903	0.000389659	0.00094813	0.000786771	0.000743213	7.01292e-05	0.00129847	0.00113415	0.000125365	0.000300666	9.85189e-05	8.60259e-05	0.0111998	0	6.71738e-05	0.00013554	0.000904029	0.000231076	0.00125717	0.000622429	4.51304e-05	0.00184505	0.0017862	4.73097e-05	0.000641919	4.30991e-05	0.000202508	0.000405171	6.67724e-05	0	0.000353464	0.00323981	5.32318e-05	0.000427852	0.000544581	0.000138698	7.67118e-05	6.57365e-05	0.000331967	0.000385609	0.00138075	0.00125485	0.00189112	0.0014729
unclassified_Paenibacillus	0.000139606	0	0	0	0.000122263	5.68521e-05	0	0	0	0	0	0	0	0.000197002	0	0.000328396	0.000172052	5.93366e-05	0.000256778	0.000201521	5.4216e-05	0.000100448	1.35927e-05	1.36649e-05	2.70621e-05	0.000165478	2.88288e-05	0	0.000236548	0	0.000244228	0.000249241	0.000460422	0.000133545	0.000270808	0.000319801	0.000118892	0	9.50781e-05	0	0.000184931	0.000168766	0.000213644	0.000202067	0.000520572	0	0	0	5.61104e-05
unclassified_Pantoea	0.041975	0.00504338	0.00437096	0.000689811	0.00706407	0.0121948	0.00043462	0.000714744	0.000969414	0.000182298	0.00105194	0.00104715	0.0010235	0.0697745	0.00120266	0.0641851	0.0712295	0.00493977	0.0522619	0.0656624	0.00447282	0.0155981	0.000543707	0.00613556	0.00270621	0.0502151	0.0136649	0.000599945	0.055305	0.000423393	0.0242792	0.0517642	0.0506464	0.0664719	0.0662525	0.0307009	0.025324	0.000439163	0.0199823	0.000408436	0.0494229	0.0442627	0.0687932	0.0349287	0.051768	0.000381909	0.000230777	0.000317593	0.0044187
unclassified_Parabacteroides	0.00128748	0.00203362	0.00105598	0.00339274	0.000298864	0.00757554	0.00347696	0.00525118	0.0106074	0.00660478	0.0207021	0.00146601	0.00333329	0.000519369	0.00545494	0.000229878	8.60259e-05	0.00396072	0.000105732	0.000167935	4.0662e-05	0.00852371	0.00604874	0.00552063	0.0217444	7.52174e-05	0.018436	0.00242705	0.000410017	0.00125652	0.0046978	0.00191604	0.00259678	0.000250396	0.000302668	0.000774254	0.00356676	0.0918782	0.014848	0.03793	0.00127911	0.000291505	0.000262946	0.000230934	0.00632399	0.0019683	0.00340396	0.00456179	0.00251094
unclassified_Paracoccus	0.000155118	2.7115e-05	0	2.81555e-05	2.71695e-05	5.68521e-05	0	1.45866e-05	1.40495e-05	2.80458e-05	4.20775e-05	0	0	0.000107456	0	0.000311977	0.000275283	2.96683e-05	0.00019636	0.000251902	1.3554e-05	8.6098e-05	0	5.46597e-05	1.35311e-05	0.000150435	0	1.36351e-05	0.000141929	0	7.18319e-05	0.00018693	0.000331504	0.000300476	0.000159299	6.73265e-05	5.9446e-05	0	3.16927e-05	1.36145e-05	0.000154109	9.20542e-05	0.000328682	0.000115467	0.000192805	1.46888e-05	0	1.44361e-05	0
unclassified_Paraprevotella	1.55118e-05	0.000298265	8.0201e-05	4.22333e-05	0	0.00116547	0.00392656	2.91732e-05	0.00629417	1.40229e-05	4.20775e-05	0	1.38311e-05	1.79093e-05	4.29523e-05	1.64198e-05	0	4.45025e-05	3.02092e-05	1.67935e-05	1.3554e-05	0.00602686	0	0	0	0	0.000418018	0.00117262	0	0	0	0.000140198	0.00103135	0	0.000127439	0.00289504	0.00597432	0	0.00353374	0	6.16437e-05	0	0	0	0	1.46888e-05	7.21178e-05	1.44361e-05	0
unclassified_Parasutterella	0.00051189	0.00178959	0.0197161	0.0001267	0.000407542	0.000127917	0.0009142	0.0014149	0.0170139	0.0108257	0.0436484	0.00201053	0.00203317	7.16371e-05	0.000658601	4.92595e-05	3.44104e-05	0.000192844	3.02092e-05	0.000151141	4.0662e-05	0.00114797	0.0110916	0.000888221	0.0227998	0.000902609	0.000115315	0.0245978	0.0014666	0.000150236	0.000229862	0.00227432	0.000847177	0.000200317	9.55795e-05	0.00176732	0.00010403	0	0.00172725	0.00464255	7.70547e-05	0.000552325	8.21706e-05	0.000822701	0.00244862	0.00832856	0.00175967	0.0132379	0.000575132
unclassified_Paucilactobacillus	0.00165976	0.000298265	6.68342e-05	2.81555e-05	0.00120904	0.000511669	4.49607e-05	2.91732e-05	0	1.40229e-05	0	2.7924e-05	0	0.00211329	5.72697e-05	0.00261075	0.00304532	0.000385688	0.00219017	0.00280451	0.00027108	0.00103318	4.0778e-05	0.000368953	0.000135311	0.00185035	0.000792793	2.72702e-05	0.00227086	0	0.00248538	0.00224317	0.00384913	0.00206994	0.00223019	0.00215445	0.00124837	3.99239e-05	0.00185402	1.36145e-05	0.00238869	0.00190245	0.00254729	0.0015588	0.00341264	2.93776e-05	1.44236e-05	1.44361e-05	0.000659297
unclassified_Pediococcus	0.00926055	0.00161334	0.00025397	0.000168933	0.00683313	0.00379488	7.49344e-05	5.83465e-05	0.000112396	4.20687e-05	8.4155e-05	6.981e-05	0	0.01302	7.15871e-05	0.0146465	0.0139706	0.00123123	0.0116305	0.014308	0.00104366	0.00519458	0.000149519	0.00169445	0.00089305	0.0116136	0.00155676	0.000109081	0.0116066	6.82892e-05	0.0105449	0.0109977	0.0030572	0.0132042	0.0134448	0.00193564	0.00722268	0.00013308	0.0015371	9.53016e-05	0.0100479	0.00440326	0.0150701	0.00672594	0.00300775	4.40665e-05	2.88471e-05	1.44361e-05	0.00352093
unclassified_Petrimonas	3.10236e-05	0	0.000200503	5.63111e-05	0.000122263	1.4213e-05	1.49869e-05	0	1.40495e-05	0	0	0	1.38311e-05	0.000143274	2.86348e-05	0.000706052	0.000653797	0	3.02092e-05	0.000621358	5.4216e-05	2.86993e-05	0	5.46597e-05	0	1.50435e-05	0	0	4.73097e-05	0	5.74655e-05	3.11551e-05	0	0.000617645	4.77897e-05	1.68316e-05	5.9446e-05	0	0	0	3.08219e-05	0	0.000460155	7.21667e-05	7.71218e-05	0	0	0	1.40276e-05
unclassified_Phascolarctobacterium	0.000946221	0.00027115	0.0138213	0.0002534	0.00025811	0.000198982	0.00220307	0.000145866	9.83464e-05	0.0222403	0.0905788	0.00438407	0.00026279	8.95464e-05	0.00496814	6.56793e-05	0.000154847	0.000741708	4.53138e-05	0.000218315	4.0662e-05	0.00179371	0.000462151	0.020716	0.000514181	0.00320426	0.00105225	0.0118353	0.000646565	0.000109263	0.000129297	0.00422151	0.00165752	0.000383941	0.00105137	0.00616037	0.00029723	5.32318e-05	0.015989	0.000599039	6.16437e-05	0.000767118	0.000131473	0.00261244	0.00940886	0.0128527	0.0143082	0.00515367	0.0135086
unclassified_Prevotella_7	0	0	0	0	0	0	0	0	4.21484e-05	2.80458e-05	0	0	0	0	0	0	0	0	0	0	0	0	0.00757112	0	2.70621e-05	3.0087e-05	0	0	0	0	0	0	0	0	0	0	4.45845e-05	0	0.000396159	0	0	0	0	0	0	0	0	1.44361e-05	0
unclassified_Prevotella_9	0.0949633	0.00178959	0.00159065	0.228018	0.00245884	0.205819	0.000149869	0.000437598	0.000351237	0.000911488	0.000715318	0.000572442	0.00065006	0.00822036	0.0772281	0.000147778	0.000206462	0.160565	0.000181255	0.000419836	9.48779e-05	0.000100448	0.000598078	0.000286964	0.000338277	0.106192	0.00730811	0.0136351	0.000299628	0.00572264	0.000215496	0.0250643	0.0339976	0.0152909	0.000493827	0.00235643	0.00851563	0.000212927	0.000206003	0.000517352	0.0554948	0.140643	0.000361551	0.000995901	0.0122045	0.000293776	0.000346165	0.000216541	5.61104e-05
unclassified_Prevotellaceae_Ga6A1_group	0	0.000135575	2.67337e-05	0	0	0	0	0	0	0	0	0	0	0	0	1.64198e-05	0	0	3.02092e-05	0	1.3554e-05	0	0	0	0	0	0	0	1.57699e-05	0	0	0	0	3.33862e-05	3.18598e-05	0	0	0	0	0	0.010649	3.06847e-05	1.64341e-05	1.44333e-05	1.92805e-05	0	0	0	0
unclassified_Proteiniphilum	4.65354e-05	0	1.33668e-05	0	0.000475466	4.26391e-05	0	0	0	0	0	0	0	0.000805917	0	0.00233161	0.00246034	5.93366e-05	7.5523e-05	0.00219994	2.7108e-05	5.73987e-05	1.35927e-05	0.000109319	1.35311e-05	0.000135391	0	0	0.000110389	1.36578e-05	0.00015803	0.000171353	3.68338e-05	0.00181955	4.77897e-05	1.68316e-05	5.9446e-05	0	1.58464e-05	0	0.000154109	1.53424e-05	0.00195566	0.000115467	7.71218e-05	0	0	0	1.40276e-05
unclassified_Proteus	4.65354e-05	1.35575e-05	4.01005e-05	1.40778e-05	0	2.8426e-05	1.49869e-05	2.91732e-05	2.8099e-05	2.80458e-05	5.61033e-05	1.3962e-05	0	0	2.86348e-05	6.56793e-05	5.16156e-05	4.45025e-05	1.51046e-05	3.35869e-05	0	1.43497e-05	1.35927e-05	0	1.35311e-05	7.52174e-05	1.44144e-05	1.36351e-05	0	0	1.43664e-05	4.67326e-05	0	6.67724e-05	3.18598e-05	0	0	1.3308e-05	0	0	3.08219e-05	3.06847e-05	1.64341e-05	1.44333e-05	7.71218e-05	2.93776e-05	0	1.44361e-05	0
unclassified_Pseudomonas	0.0111685	0.00122017	0.000454473	0.000239322	0.0036543	0.00369539	0.000104908	0.000204213	8.42969e-05	5.60915e-05	9.81808e-05	0	5.53243e-05	0.0134857	0.000128857	0.0185216	0.0173084	0.00148342	0.013866	0.0176835	0.00147739	0.0042188	0.000108741	0.00177644	0.00075774	0.013825	0.00373333	8.18107e-05	0.014871	0.000150236	0.00936687	0.0142379	0.0163358	0.0191303	0.0185902	0.0105871	0.00628641	0.000173003	0.00716255	0.000108916	0.0130376	0.0127035	0.0173873	0.00857341	0.0169861	0.000146888	2.88471e-05	2.88721e-05	0.00175345
unclassified_Psychrobacter	0.000124094	0	2.67337e-05	0	0	4.26391e-05	0	0	4.21484e-05	0	7.01292e-05	1.3962e-05	0	3.58185e-05	1.43174e-05	0.000246297	0.000275283	0	0.000256778	0.000134348	6.777e-05	2.86993e-05	1.35927e-05	1.36649e-05	6.76553e-05	0.000225652	0	0	0.000220778	0	0.00015803	0.000140198	0.000128918	0.00026709	0.000223019	0	0.000133753	0	0	1.36145e-05	0.000184931	0.000168766	0.000197209	7.21667e-05	1.92805e-05	4.40665e-05	0	1.44361e-05	2.80552e-05
unclassified_RF39	0.0010548	0	8.0201e-05	0.0233128	0	0.00180505	0.00329712	4.37598e-05	1.40495e-05	4.20687e-05	1.40258e-05	4.1886e-05	0.0106499	0.000161183	0	3.28396e-05	1.72052e-05	0.000192844	1.51046e-05	5.03804e-05	1.3554e-05	0	0.00517881	0.000177644	0	4.51304e-05	0.00462703	0	0	0.0033052	2.87327e-05	1.55775e-05	1.84169e-05	1.66931e-05	0.00105137	0.000387127	0.00616752	0	0.000206003	1.36145e-05	0.00016952	1.53424e-05	8.21706e-05	2.88667e-05	1.92805e-05	0	0	5.77442e-05	0
unclassified_Rahnella1	0.000449843	4.06725e-05	4.01005e-05	0	8.15084e-05	0.00014213	2.99738e-05	1.45866e-05	0	0	0	0	0	0.000823826	0	0.000853831	0.00092908	7.41708e-05	0.000709916	0.000772499	4.0662e-05	0.000114797	2.71854e-05	9.56546e-05	0.00012178	0.000631826	0.000216216	0	0.000583486	0	0.000330427	0.000638679	0.000755092	0.000817962	0.000892075	0.000673265	0.000282368	0	0.000380312	0	0.000523972	0.000690406	0.000640931	0.000433	0.000983303	1.46888e-05	0	0	7.0138e-05
unclassified_Rhizobiaceae	0.000279213	1.35575e-05	0.000120302	4.22333e-05	9.50932e-05	0.000127917	1.49869e-05	0	5.61979e-05	2.80458e-05	2.80517e-05	0	2.76621e-05	0.00048355	7.15871e-05	0.000476175	0.000602182	7.41708e-05	0.000302092	0.000503804	4.0662e-05	5.73987e-05	0	5.46597e-05	0	0.000330956	0.000100901	6.81756e-05	0.000362707	1.36578e-05	0.000272961	0.000249241	0.000460422	0.000350555	0.000318598	0.000252474	0.000208061	0	0.000126771	0	0.000292808	0.000306847	0.00055876	0.000187634	0.000539853	1.46888e-05	1.44236e-05	2.88721e-05	4.20828e-05
unclassified_Rhodococcus	0.00575488	0.000664317	0.000106935	0.0001267	0.00270336	0.00173399	5.99475e-05	5.83465e-05	0	1.40229e-05	1.40258e-05	2.7924e-05	1.38311e-05	0.00933073	4.29523e-05	0.0121999	0.012663	0.000904883	0.00839816	0.0122592	0.00047439	0.00301343	9.51488e-05	0.000792566	0.000405932	0.00837922	0.00147027	2.72702e-05	0.00969848	8.19471e-05	0.00613444	0.00867669	0.00550665	0.0112011	0.0116766	0.00233959	0.00399774	6.65398e-05	0.00213926	6.80726e-05	0.0077517	0.00523175	0.0120462	0.00430114	0.00572629	2.93776e-05	2.88471e-05	4.33082e-05	0.00171137
unclassified_Rhodospirillales	0	0	0	0	0	0	0	0	0	0	0	0	0	0	0	0	0	0	0	0	0	1.43497e-05	0	0.00218639	0	0	0	0	0	0	0	0	0	0	0	0	0	0	0	0	0	0	0	0	0	0	0	0	0
unclassified_Rikenellaceae_RC9_gut_group	0	4.06725e-05	4.01005e-05	0	0	0	0	0	0	0	0	0	0	0	0	0	0	4.45025e-05	0	0	0	0	0.000108741	9.56546e-05	6.76553e-05	1.50435e-05	0	0	0	0.00729329	1.43664e-05	0	0	1.66931e-05	0	0	0	1.3308e-05	0	0	3.08219e-05	0	0	0	0	0	0	0	0
unclassified_Romboutsia	0.000589449	0.00416215	0.0134203	0.000154855	0.00209205	0.00373803	0.000134882	0.00129821	7.02474e-05	0.000140229	8.4155e-05	0.00020943	0.000138311	0.000555187	0.00201876	0.000311977	0.000344104	0.00124607	0.000407824	0.000319076	0.00246683	0.000143497	0.00666041	5.46597e-05	0.00063596	0.000330956	0.000201802	4.09054e-05	0.00100927	0.00120189	0.000387892	0.000810032	0.000902427	0.00131875	0.000254879	0.000605938	0.000936274	2.66159e-05	0.000491237	4.08436e-05	0.000847601	0.00243944	0.000509458	0.0029444	0.00100258	0.00171859	0.00131254	0.00383999	0.000575132
unclassified_Roseburia	0.011851	0.00600597	0.0115757	0.0194977	0.000190186	0.00798772	0.0231997	0.00646187	0.000674375	0.0249187	0.000154284	0.033788	0.00340244	0.00121783	0.006901	0.000197038	0.000223667	0.0180087	0.00776376	0.000134348	0.0366229	0.0225003	0.00229716	0.00627221	0.0184023	0.000346	0.0425514	0.0965367	0.00157699	0.0034008	0.000186763	0.0115741	0.00331504	0.000667724	0.000669056	0.00821383	0.00188741	0.00286121	0.010522	0.00176989	0.000893834	0.00227067	6.57365e-05	0.00295884	0.00217869	0.0680239	0.00918781	0.0744467	0.00443272
unclassified_Ruminococcaceae	0.000310236	0.000854121	0.000708442	0.00639131	0.000217356	0.0650814	0.000494567	0.0649104	0.00137685	0.000813327	0.000210388	0.00226184	0.0361959	0.00171929	0.0130288	0.000147778	5.16156e-05	0.0011274	9.06276e-05	3.35869e-05	0.000189756	0.00406096	0.00254183	0.0323996	0.000148842	0.000165478	0.00507387	8.18107e-05	0.000157699	0.0138627	7.18319e-05	7.78877e-05	0.000810343	0.000317169	0.000382318	0.00982966	0.028222	0.000266159	0.082718	0.00940763	0.00157192	0.000383559	0.000147907	0.158406	0.00316199	0.00161577	0.088402	0.0240649	0.0012204
unclassified_Ruminococcus	0.00085315	0.0348292	0.00419719	0.000872821	0.000190186	0.00346798	0.0271113	0.0555021	0.000168594	0.000995625	0.000154284	0.00199657	0.00203317	0.00503251	0.0105233	8.20991e-05	3.44104e-05	0.00468759	7.5523e-05	0.000117554	0.0279754	0.000143497	0.063804	0.00191309	0.00603486	0.00246713	0.00585225	0.000163621	7.88494e-05	0.0185064	0.000186763	0.00303762	0.000847177	0.000817962	0.000159299	0.0100148	0.000208061	0.000119772	0.000728932	0.000122531	0.000231164	0.00415778	1.64341e-05	0.00544137	0.000520572	0.0526594	0.00721178	0.000895035	0.00577937
unclassified_Saccharopolyspora	0.000651496	0.000122017	4.01005e-05	1.40778e-05	0.000475466	0.00014213	1.49869e-05	0	1.40495e-05	0	0	1.3962e-05	0	0.00155811	0	0.00175692	0.00111834	5.93366e-05	0.00116305	0.00144424	0.000121986	0.000530938	0	0.000163979	4.05932e-05	0.00132383	0.000475676	1.36351e-05	0.0011512	0	0.000962547	0.00112158	0.00145493	0.00131875	0.00159299	0.0010099	0.000579598	0	0.000728932	1.36145e-05	0.000940067	0.00115068	0.00170915	0.000678367	0.00154244	0	0	0	0.000182359
unclassified_Saccharopolyspora_rectivirgula	0.000186142	0	0	0	0	2.8426e-05	0	1.45866e-05	0	0	0	0	0	0.000232821	0	0.000229878	0.000137642	1.48342e-05	0.000120837	0.000218315	0	2.86993e-05	1.35927e-05	0	0	0.000180522	2.88288e-05	0	0.000173469	0	0.00015803	0.000218086	0.000128918	0.000233703	0.000270808	6.73265e-05	5.9446e-05	0	6.33854e-05	0	4.62328e-05	9.20542e-05	0.000361551	0.0001299	0.000173524	0	0	0	0
unclassified_Schleiferilactobacillus	0.000387795	9.49024e-05	1.33668e-05	1.40778e-05	0.00025811	0.000312687	1.49869e-05	0	0	0	0	1.3962e-05	0	0.000411913	1.43174e-05	0.000492595	0.000447335	0.000133507	0.000468243	0.00048701	2.7108e-05	0.000200895	0	4.09948e-05	4.05932e-05	0.00039113	7.20721e-05	0	0.000551946	0	0.000344793	0.000451749	0.000478839	0.000400634	0.000573477	0.000269306	0.000326953	0	0.000427852	0	0.00032363	0.00032219	0.00055876	0.0002598	0.000501292	0	0	1.44361e-05	7.0138e-05
unclassified_Secundilactobacillus	0.000744567	0.000135575	1.33668e-05	0	0.000489051	0.000369539	0	0	0	0	0	0	0	0.00114619	1.43174e-05	0.00134643	0.00111834	0.000252181	0.00101201	0.00117554	0.00013554	0.00045919	0	0.000163979	6.76553e-05	0.000962782	0.000504505	2.72702e-05	0.000961963	4.09735e-05	0.00099128	0.000825609	0.0016391	0.000884734	0.00101951	0.000841581	0.00059446	0	0.000792318	4.08436e-05	0.000816779	0.00122739	0.000953179	0.000591767	0.00127251	0	0	0	0.000406801
unclassified_Senegalimassilia	0	0	1.33668e-05	0	0	0.000866995	0	0.000598051	0	0	0	1.3962e-05	0	0	0.00227647	0	0	0.000474693	0	0	0	0	1.35927e-05	0	0	0	0.000187387	0	0	0.00248573	0	0	0	0.000150238	0	0	0.00331411	0	1.58464e-05	0	6.16437e-05	0	0	0	1.92805e-05	8.81329e-05	0.0014712	0	0
unclassified_Serratia	0.00300929	0.000393167	0.000120302	4.22333e-05	0.000665652	0.00093806	4.49607e-05	5.83465e-05	7.02474e-05	0	1.40258e-05	2.7924e-05	2.76621e-05	0.00472805	1.43174e-05	0.00446619	0.00509274	0.000459859	0.00336833	0.00507162	0.000718362	0.00157846	1.35927e-05	0.000601257	0.000162373	0.00329452	0.00116757	1.36351e-05	0.00380054	2.73157e-05	0.00221242	0.00378534	0.00451214	0.00512478	0.00492234	0.00323167	0.00191713	3.99239e-05	0.00182233	4.08436e-05	0.00396061	0.00348272	0.00540683	0.00252584	0.00485867	4.40665e-05	1.44236e-05	2.88721e-05	0.000476939
unclassified_Sphingobacterium	0.00248189	0.000244035	4.01005e-05	0	0.000937347	0.000483243	4.49607e-05	4.37598e-05	1.40495e-05	1.40229e-05	1.40258e-05	0	0	0.00180884	1.43174e-05	0.00540212	0.00509274	0.000252181	0.00333812	0.00581054	0.000257526	0.000918379	2.71854e-05	0.000273299	0.00012178	0.00368565	0.000576577	2.72702e-05	0.00433672	5.46314e-05	0.00244228	0.00331802	0.00138127	0.00527502	0.00532059	0.000942571	0.00136726	1.3308e-05	0.000459544	1.36145e-05	0.00322088	0.00156492	0.00562047	0.00200624	0.00121467	0	4.32707e-05	2.88721e-05	0.000603187
unclassified_Sphingomonas	0.0013185	0.000203362	0.000267337	9.85444e-05	0.000692822	0.000341113	4.49607e-05	4.37598e-05	7.02474e-05	7.01144e-05	5.61033e-05	1.3962e-05	5.53243e-05	0.0025073	0.000114539	0.00261075	0.00278724	0.000311517	0.0016464	0.00297244	0.000216864	0.000416141	0.000163112	0.000273299	0.000148842	0.00180522	0.000518919	0.000327243	0.00206586	0.000122921	0.00126424	0.00160449	0.00230211	0.00278775	0.00230984	0.00134653	0.000861966	2.66159e-05	0.00104586	0.000108916	0.00189554	0.00148821	0.00281024	0.000952601	0.00219797	0.000102822	0.000100965	5.77442e-05	0.000308607
unclassified_Staphylococcus	0.0504444	0.00704989	0.00122975	0.000830588	0.0316932	0.0183206	0.000719371	0.000466772	0.000337188	0.000210343	0.000154284	0.000195468	0.000373439	0.0557874	0.000357935	0.0839217	0.0812945	0.00652703	0.0706744	0.0827078	0.00547581	0.0265182	0.000584485	0.00858158	0.00443819	0.0718777	0.00945586	0.000709026	0.0737715	0.000450709	0.0599221	0.0683387	0.0206453	0.0725148	0.082055	0.0137683	0.0333343	0.000665398	0.0101734	0.000599039	0.0599177	0.0269872	0.0843892	0.0416546	0.0208229	0.000514109	0.000216353	0.000216541	0.0163281
unclassified_Stenotrophomonas	0.000465354	4.06725e-05	4.01005e-05	1.40778e-05	0.000163017	0.000227408	0	1.45866e-05	5.61979e-05	4.20687e-05	2.80517e-05	0	0	0.000626825	1.43174e-05	0.000968769	0.00125598	7.41708e-05	0.000543766	0.000974021	8.1324e-05	0.000215245	0	0.000136649	0	0.000541565	8.64865e-05	0	0.000914653	1.36578e-05	0.000517189	0.000778877	0.000626174	0.000817962	0.000764636	0.000286137	0.000267507	2.66159e-05	0.000301081	0	0.000739725	0.000414244	0.00115039	0.000274234	0.000636255	0	0	1.44361e-05	0.000112221
unclassified_Streptococcus	0.0343587	0.00566703	0.00530664	0.000957288	0.0161387	0.0107593	0.000809292	0.00297567	0.0214114	0.000280458	0.00354854	0.00174525	0.00260024	0.0257356	0.00831842	0.0370924	0.0328963	0.00778793	0.0270372	0.0329656	0.0118597	0.0100448	0.00384673	0.0063132	0.00460056	0.0294702	0.00717838	0.00253613	0.0290954	0.014969	0.0240062	0.0262326	0.0303879	0.0304816	0.0335643	0.0141217	0.0149655	0.00940873	0.0101417	0.0491484	0.044214	0.0183034	0.0329176	0.0153859	0.0184514	0.00101353	0.00142793	0.00268511	0.00677533
unclassified_Streptomyces	0.000791102	0.00010846	5.34674e-05	1.40778e-05	0.000448296	0.00028426	1.49869e-05	1.45866e-05	2.8099e-05	2.80458e-05	1.40258e-05	0	0	0.00182675	2.86348e-05	0.00200322	0.00182375	7.41708e-05	0.00148025	0.00189766	9.48779e-05	0.000358742	0	0.000136649	6.76553e-05	0.00139904	0.000172973	0	0.000851574	1.36578e-05	0.000933814	0.00107485	0.00139968	0.00181955	0.0015452	0.00109406	0.000639044	0	0.000808164	4.08436e-05	0.00121746	0.00084383	0.00180775	0.000822701	0.00171596	0	0	0	0.000196386
unclassified_Subdoligranulum	0.00756976	0.0242815	0.0166818	0.00678548	0.00110036	0.0549618	0.0337505	0.0155785	0.0237998	0.0227451	0.0191172	0.0212083	0.0778551	0.00866809	0.1614	0.000607533	0.000137642	0.0265828	0.022234	0.000822879	0.0207105	0.035702	0.0709402	0.0238043	0.031162	0.013133	0.0416432	0.0263022	0.0149656	0.014969	0.00304567	0.00565465	0.00924528	0.00859695	0.00304261	0.0157039	0.0252348	0.000479087	0.0138497	0.00445195	0.00383732	0.0176744	0.000230078	0.106085	0.0101801	0.0174356	0.0376888	0.00747788	0.0723965
unclassified_Sutterella	0.000108583	0.000176247	5.34674e-05	0	0	0.00277154	0	0.00300484	2.8099e-05	2.80458e-05	7.01292e-05	0.000167544	8.29864e-05	1.79093e-05	4.29523e-05	0	0	0.000845547	0	3.35869e-05	4.0662e-05	4.3049e-05	0.00100586	1.36649e-05	2.70621e-05	0	2.88288e-05	1.36351e-05	0	0.000245841	0.000114931	0.000202508	0.000110501	0	0	1.68316e-05	8.91689e-05	0	0	0.000680726	1.54109e-05	0	0	1.44333e-05	0	0.00790258	5.76942e-05	5.77442e-05	0.000154304
unclassified_TM7x	0	0.000135575	0.000160402	7.03888e-05	0.000393958	5.68521e-05	0	0.000102106	2.8099e-05	2.80458e-05	0.000392723	4.1886e-05	1.38311e-05	0	0.000100222	0	0	0.000103839	0	0	0.000718362	5.73987e-05	1.35927e-05	8.19896e-05	0.000108249	1.50435e-05	5.76577e-05	0.000422689	1.57699e-05	9.56049e-05	0.00015803	7.78877e-05	0.000110501	6.67724e-05	0	1.68316e-05	5.9446e-05	0.000412547	0	2.7229e-05	3.08219e-05	6.13695e-05	0	0.000404134	0.000115683	2.93776e-05	0.000187506	4.33082e-05	1.40276e-05
unclassified_Thermoactinomyces	0.00034126	1.35575e-05	0	0	0.000217356	7.10651e-05	0	0	0	0	0	0	0	0.000358185	0	0.000689633	0.00049895	5.93366e-05	0.000347406	0.000604564	4.0662e-05	0.000186546	0	4.09948e-05	1.35311e-05	0.000406174	1.44144e-05	0	0.000536176	2.73157e-05	0.000488457	0.000529636	0.000368338	0.000584258	0.000461967	0.000117821	0.000252645	0	0.000126771	0	0.000416095	0.000245478	0.000640931	0.000245367	0.000231365	1.46888e-05	0	1.44361e-05	5.61104e-05
unclassified_Turicibacter	9.30709e-05	6.77874e-05	0.000494573	0	5.4339e-05	0.00234515	1.49869e-05	0.000218799	0.000168594	1.40229e-05	8.4155e-05	0.000153582	5.53243e-05	7.16371e-05	0.00094495	4.92595e-05	1.72052e-05	4.45025e-05	3.02092e-05	3.35869e-05	1.3554e-05	0	0.000231076	0.000191309	0.000202966	0.000135391	7.20721e-05	0	3.15398e-05	0	2.87327e-05	0.000623101	0.000276253	3.33862e-05	1.59299e-05	0.00010099	0.000193199	0	0.000221849	1.36145e-05	0.000107877	0.000107397	4.93024e-05	0.0018186	0.000597694	0.000146888	0.000663484	0.00463397	9.81932e-05
unclassified_Tychonema_CCAP_1459_11B	0	0	0	0	0.000122263	0	0	0	1.40495e-05	0	0	1.3962e-05	1.38311e-05	0.000447732	2.86348e-05	0.000837411	0.000774234	1.48342e-05	0.000105732	0.000604564	4.0662e-05	4.3049e-05	0	4.09948e-05	2.70621e-05	4.51304e-05	4.32432e-05	1.36351e-05	6.30795e-05	0	0.000114931	6.23101e-05	0.000313087	0.000734496	3.18598e-05	0.00010099	0	0	9.50781e-05	0	0.000107877	0.000429586	0.000772404	0	0.000501292	0	0	0	2.80552e-05
unclassified_Tyzzerella	9.30709e-05	0.000623644	0.000147035	0.000323789	0.000217356	2.8426e-05	1.49869e-05	0.00223175	0.000168594	8.41373e-05	4.20775e-05	0.00034905	0.00167356	0	0.000873362	0	5.16156e-05	1.48342e-05	0.00102711	3.35869e-05	0.00703452	0.000401791	0.000285446	0.00796666	0.000920113	0.000481391	0	0.00940824	0.000331168	0	4.30991e-05	4.67326e-05	0.000147335	0.000500793	1.59299e-05	0.00151485	0.000222922	1.3308e-05	0.00480145	0.0211978	0.00129452	0.00133479	0	0.0010825	9.64023e-05	0.000337843	0.00116831	4.33082e-05	0.00186567
unclassified_UBA1819	0	0	8.0201e-05	0.000140778	0	8.52781e-05	5.99475e-05	0	0.000674375	0.000224366	0.000378698	6.981e-05	0.000608567	0.000107456	0.00100222	1.64198e-05	0	0.000103839	0	0	5.4216e-05	0.000172196	0.000367002	0.000204974	0.00151548	1.50435e-05	0.000216216	0.000395419	9.46193e-05	2.73157e-05	1.43664e-05	7.78877e-05	9.20844e-05	1.66931e-05	0.000270808	0.000168316	0.000475568	0	4.75391e-05	0.00185157	0	0	1.64341e-05	2.88667e-05	0.000154244	0.000778507	0.000230777	0.000375337	0.000406801
unclassified_UCG_002	0.00443638	0.00107104	0.00054804	0.013585	0.000312449	0.0169135	0.00556013	0.00608262	0.0102983	0.0168555	0.00016831	0.00781872	0.0205115	0.00132529	0.0128284	4.92595e-05	0.000189257	0.0163027	7.5523e-05	0.000218315	8.1324e-05	0.0341092	0.00803327	0.0136103	0.00346395	0.000406174	0.0125982	0.00560404	0.000141929	0.0752957	0.00031606	0.000700989	0.0054514	0.000133545	0.00127439	0.00279405	0.0303917	0.000119772	0.00234526	0.0225865	0.000739725	0.000352874	1.64341e-05	0.0012557	0.000925462	0.00834325	0.00963494	0.0035224	0.00342274
unclassified_UCG_003	0.00051189	0.000338937	0.000120302	0.00108399	2.71695e-05	0.00157765	0.000419633	0.000656398	0.00199503	0.00103769	2.80517e-05	0.00221996	0.00157674	5.37278e-05	0.00297802	3.28396e-05	3.44104e-05	0.00292233	3.02092e-05	0	5.4216e-05	0.000832281	0.000135927	0.000901886	0.000338277	1.50435e-05	0.000302703	0.000313608	0	0.00239012	1.43664e-05	0.000202508	0.000165752	0	0	0.000555443	0.00203602	0	0.000412005	0.00130699	0.000123287	1.53424e-05	1.64341e-05	8.66001e-05	0.000520572	0.000881329	0.00129812	0.000332029	0.000322635
unclassified_UCG_005	0.0145966	0.00212852	0.000949046	0.00520877	0.000190186	0.0133602	0.018269	0.00776008	9.83464e-05	0.0013462	0.00016831	0.00504028	0.00590587	0.00111037	0.0242967	0.000114939	8.60259e-05	0.0328577	7.5523e-05	0.000218315	0.000853902	0.00264034	0.00951488	0.00356655	0.00165079	0.000451304	0.0293622	9.54459e-05	0.000220778	0.0157612	7.18319e-05	0.000856765	0.00278095	0.00026709	0.000637196	0.00486434	0.0186363	6.65398e-05	0.00110924	0.000762413	0.00480821	0.000230135	4.93024e-05	0.00330524	0.00044345	0.00727096	0.00925993	0.00242526	0.00317024
unclassified_UCG_010	0.000186142	0.000338937	0.000133668	0.0043078	1.35847e-05	0.000170556	0.000404646	0.000466772	1.40495e-05	0	1.40258e-05	0.0016894	5.53243e-05	0.000107456	0.00479633	1.64198e-05	1.72052e-05	0.00140924	0	1.67935e-05	0	7.17484e-05	0.00183501	0.00121618	4.05932e-05	0	0.00276757	1.36351e-05	0	0.00131115	1.43664e-05	3.11551e-05	0.000147335	5.00793e-05	3.18598e-05	0.000942571	0.00796576	0	3.16927e-05	1.36145e-05	4.62328e-05	0.000122739	3.28682e-05	0.000331967	0	0.000176266	0.000822143	4.33082e-05	0.000364718
unclassified_Veillonella	0.00116339	0.00184382	0.000628241	0.000295633	0.000217356	0.00203246	0.000509554	0.000700158	0.0138949	0.000140229	0.000364672	0.000516594	4.14932e-05	0.000376095	0.00110244	4.92595e-05	1.72052e-05	0.00658636	0.00036251	5.03804e-05	0.00260237	0.000774882	0.00254183	0.000218639	0.00063596	0.00030087	1.44144e-05	0.000272702	0.000488866	0.00610506	0.0144095	7.78877e-05	0.000791926	0.000100159	0	0.000117821	0.000549875	0.19037	0.000602161	0.000136145	0.000400684	0.000629037	0	2.88667e-05	0.000250646	4.40665e-05	0.00148563	0.00718916	0.000210414
unclassified_Weissella	0.0128128	0.00193872	0.00165749	0.000450488	0.00782481	0.004804	0.00023979	0.000291732	0.00217767	0.000140229	0.000252465	8.3772e-05	0.000235128	0.0146856	0.000214761	0.0215592	0.0237432	0.00213612	0.0179896	0.0232589	0.00142317	0.00697394	0.000502929	0.00203608	0.00163726	0.0167735	0.0036036	0.000218162	0.0183088	0.00486219	0.0155731	0.0168393	0.0114921	0.021918	0.0223019	0.00738908	0.0100018	0.000505702	0.00613254	0.000176989	0.0177226	0.00908268	0.0241253	0.00945384	0.0132071	0.000132199	0.000100965	8.66163e-05	0.00446078
unclassified_Woeseia	9.30709e-05	2.7115e-05	1.33668e-05	2.81555e-05	1.35847e-05	5.68521e-05	0	2.91732e-05	1.40495e-05	0	0	0	0	0.000125365	0	4.92595e-05	0	4.45025e-05	9.06276e-05	0	1.3554e-05	0.000100448	0	1.36649e-05	1.35311e-05	0.000120348	0.000317117	0	0.000141929	0	0.000143664	4.67326e-05	0.00651958	0.000100159	0.000143369	0.00400592	5.9446e-05	2.66159e-05	0.00291573	1.36145e-05	0.000184931	0.00184108	0	0.000404134	0.00721089	0	0	0	2.80552e-05
unclassified_Xanthomonas	0.000806614	6.77874e-05	1.33668e-05	2.81555e-05	0.000176602	0.000184769	0	0	1.40495e-05	0	1.40258e-05	0	0	0.000949191	0	0.00136285	0.00127318	8.90049e-05	0.000906276	0.00176331	9.48779e-05	0.000344392	1.35927e-05	9.56546e-05	6.76553e-05	0.000872522	0.000216216	1.36351e-05	0.00110389	0	0.000718319	0.00110601	0.000994512	0.00133545	0.00148148	0.000841581	0.00040126	2.66159e-05	0.000380312	0	0.00103253	0.00102794	0.00138047	0.000433	0.00131107	0	0	2.88721e-05	0.000140276
unclassified_[Bacteroides]_pectinophilus_group	0	0	0	0	0	0	0	0	0	0	0	0	0	0	1.43174e-05	0	0	0	0	0	0	0	0	0	0	0	0	0	0	0.0178098	1.43664e-05	4.67326e-05	1.84169e-05	0	0	0	0	0	0	0	0	0	0	0	1.92805e-05	0	0	0	0
unclassified_[Clostridium]_innocuum_group	0	0	2.67337e-05	0	0	0	0	2.91732e-05	9.83464e-05	0	9.81808e-05	0	1.38311e-05	0	4.29523e-05	0	0	0	0	0	0.00013554	2.86993e-05	0.000135927	0	0.000405932	0	1.44144e-05	1.36351e-05	1.57699e-05	1.36578e-05	0	1.55775e-05	0	0	0	0	8.91689e-05	0.000399239	0	0.00992498	3.08219e-05	1.53424e-05	0	0	1.92805e-05	0.000146888	0	1.44361e-05	7.0138e-05
unclassified_[Eubacterium]_coprostanoligenes_group	0.000620472	0.00349783	0.000788644	0.00630684	0.000203771	0.00531567	0.00947171	0.00635976	0.000238841	0.003674	0.000224413	0.00770702	0.014495	0.00197002	0.0254993	0.000262717	0.000189257	0.00541447	0.000211464	0.000654945	0.00398487	0.00342957	0.00723131	0.0207434	0.00611604	0.000361043	0.0298234	0.000259067	0.000220778	0.0346363	0.000287327	0.00373861	0.00248628	0.000467407	0.00323377	0.0132128	0.0311348	0.000186311	0.00316927	0.00325387	0.000215753	0.000782461	0.000115039	0.0119219	0.00726873	0.00287901	0.0357849	0.0241804	0.0247447
unclassified_[Eubacterium]_eligens_group	0.00921402	0.00300976	0.000347538	0.0031675	5.4339e-05	0.00137866	0.00689397	0.00137114	0.00890737	0.00746018	0.000126233	0.012845	8.29864e-05	0.00128947	7.15871e-05	8.20991e-05	0	0.00155759	0.00925912	5.03804e-05	0.00860679	0.00961428	0.0033438	0.0321399	1.35311e-05	9.02609e-05	0.00586667	1.36351e-05	3.15398e-05	0.0120189	7.18319e-05	0.000358283	0.00342554	0.000250396	3.18598e-05	0.0039386	0.000445845	1.3308e-05	0.000110924	0.000163374	1.54109e-05	0.000613695	0	0.00444547	0.000250646	0.00453884	0.00132697	0.000765111	0.000967905
unclassified_[Eubacterium]_hallii_group	0.000139606	0.000189805	0.00149709	0.000168933	0.000434712	0.000369539	0.000179843	0.000350079	0.000309089	0.000350572	0.000547008	0.000376974	0.000816033	0.000125365	0.000615649	1.64198e-05	1.72052e-05	0.000726874	0.000120837	3.35869e-05	0.00047439	0.000172196	0.00125053	0.000792566	0.000811864	6.01739e-05	0.000273874	9.54459e-05	0.000110389	0.00069655	1.43664e-05	0.00018693	0.000147335	0.000500793	0	0.000336632	0.000341814	6.65398e-05	0.000285234	0.00014976	0.000138698	0.000107397	0	0.000938168	0.000616975	0.000176266	0.000591366	0.000461954	0.000575132
unclassified_[Eubacterium]_ruminantium_group	0.0111995	0.000135575	0.000120302	0.00450488	2.71695e-05	0.000270047	0	0.0043614	2.8099e-05	8.41373e-05	8.4155e-05	0.00578027	2.76621e-05	0.00207748	0.000529744	1.64198e-05	0	0.000637869	3.02092e-05	0.00107478	0.00218219	2.86993e-05	0.000434966	0.0021044	8.11864e-05	1.50435e-05	0.0127423	4.09054e-05	0	0.0465596	7.18319e-05	3.11551e-05	0.00292828	0.000116852	0.000270808	0.00499899	0.00989775	1.3308e-05	0.000285234	0.000122531	0.00016952	0.000107397	0	0.0001732	7.71218e-05	0.00177735	4.32707e-05	0.00801201	1.40276e-05
unclassified_[Eubacterium]_siraeum_group	0.00255945	0.00300976	2.67337e-05	0.000211166	2.71695e-05	8.52781e-05	0.0215511	0.000116693	0.000140495	0.00113585	0.000294543	0.00435614	0.000345777	8.95464e-05	0.000587014	8.20991e-05	5.16156e-05	0.00548864	3.02092e-05	0	0	0	0.00116897	0.00269199	0	1.50435e-05	7.20721e-05	0	0	0.0014887	0	0.000420594	1.84169e-05	6.67724e-05	6.37196e-05	5.04948e-05	0.000237784	0	0.000142617	0	0.000339041	0.000122739	0	0.000779401	3.85609e-05	0.00846076	0.000778872	0.0454447	7.0138e-05
unclassified_[Eubacterium]_ventriosum_group	0.000403307	0.000894794	0.000200503	0.00106991	2.71695e-05	0.000739077	0.00181341	0.00571795	7.02474e-05	0.000560915	0.000210388	0.00187091	0.000816033	0.000644734	0.000157492	4.92595e-05	0.000103231	0.00379754	0.00143494	1.67935e-05	0.00333428	0.000215245	0.00163112	0.00252801	0.000270621	0	5.76577e-05	9.54459e-05	7.88494e-05	0.00019121	4.30991e-05	0.000155775	0.000239419	5.00793e-05	0	0.00176732	0.000312091	2.66159e-05	0.00126771	0.000340363	1.54109e-05	1.53424e-05	0	0.0003031	9.64023e-05	0.00719752	0.00175967	0.00734795	0.000434856
unclassified_[Eubacterium]_xylanophilum_group	0.00130299	9.49024e-05	2.67337e-05	0.00109807	0	0.000383752	0.00337205	0.000670984	2.8099e-05	0.000518847	2.80517e-05	0.00382559	0.00026279	0.000197002	0.000157492	4.92595e-05	3.44104e-05	0.00225479	0	1.67935e-05	4.0662e-05	0.000215245	0.000502929	1.36649e-05	1.35311e-05	0	0.00113874	0	0	0.000341446	0	0.000280396	0.000202586	6.67724e-05	1.59299e-05	0.000589107	0.000921412	1.3308e-05	4.75391e-05	2.7229e-05	0.000277397	1.53424e-05	3.28682e-05	0.000418567	3.85609e-05	0.00296714	0.00311549	2.88721e-05	8.41656e-05
unclassified_[Ruminococcus]_gauvreauii_group	7.75591e-05	0.000433839	0.00160402	0.00204128	0.000502635	0.000255834	0.00019483	0.000189626	0.000168594	5.60915e-05	1.40258e-05	0.000530556	8.29864e-05	3.58185e-05	0.000229079	0	0	0.00235863	0.000241674	0	0.000921671	4.3049e-05	0.000815561	0.000710577	2.70621e-05	3.0087e-05	0.000273874	0.000272702	0.000252318	6.82892e-05	0	4.67326e-05	0.000110501	0.000283783	1.59299e-05	0.000370296	5.9446e-05	0	4.75391e-05	0.000122531	0.00032363	1.53424e-05	1.64341e-05	0.000245367	3.85609e-05	0.000161577	2.88471e-05	0.000317593	0.000224442
unclassified_[Ruminococcus]_gnavus_group	0	6.77874e-05	0.00185799	2.81555e-05	0.000230941	4.26391e-05	7.49344e-05	1.45866e-05	0.000210742	4.20687e-05	0.000799473	1.3962e-05	4.14932e-05	0.000429823	7.15871e-05	0.000328396	3.44104e-05	0.000252181	0.000151046	3.35869e-05	0.000921671	0.000186546	0.000584485	0.00340257	0.0020026	0	5.76577e-05	0.0005045	9.46193e-05	0.000163894	0.000186763	0.000155775	0.000165752	0.000200317	1.59299e-05	0.00010099	0	0.200977	4.75391e-05	0.000435665	9.24656e-05	0.000460271	0.000147907	0.000101033	0.000250646	0.00402474	0.000288471	0.000288721	0.000210414
unclassified_[Ruminococcus]_torques_group	0.00373835	0.00220987	0.0054002	0.000281555	0.00054339	0.00258677	0.00659423	0.00317988	0.00207932	0.00019632	0.00262283	0.00156374	0.00278004	0.00073428	0.00137447	1.64198e-05	0	0.00318934	6.04184e-05	6.71738e-05	0.00592309	0.00703134	0.00539629	0.00531566	0.00527712	7.52174e-05	0.000792793	0.00248159	0.00509367	0.00031413	5.74655e-05	0.00325571	0.00132602	0.000851348	0.000302668	0.000572275	0.00647961	0.000106464	0.00172725	0.00235531	0.000785958	0.00058301	6.57365e-05	0.000230934	0.00528284	0.00741785	0.00210584	0.000649622	0.0105347
uncultured_Acetivibrio_sp.	0.00103929	0.00143709	5.34674e-05	0.00336459	5.4339e-05	0.0003269	0.00181341	5.83465e-05	0	1.40229e-05	1.40258e-05	0.00681345	2.76621e-05	5.37278e-05	0	3.28396e-05	1.72052e-05	0.0018691	0	0	0.000108432	0	0.0340904	2.73299e-05	1.35311e-05	7.52174e-05	0	1.36351e-05	0	0	1.43664e-05	0	0.000276253	0.000166931	3.18598e-05	0.000201979	0.00451789	2.66159e-05	1.58464e-05	0	0.000123287	1.53424e-05	4.93024e-05	0.0029877	0.000115683	0.00342249	2.88471e-05	0	0
uncultured_Allobaculum_sp.	0.000124094	2.7115e-05	2.67337e-05	0	6.79237e-05	4.26391e-05	0	0	0	0	0	0	0	7.16371e-05	1.43174e-05	6.56793e-05	5.16156e-05	0	0.000151046	8.39673e-05	0	8.6098e-05	0	0	1.35311e-05	0.000195565	2.88288e-05	0	0.000205009	0	0.000172396	0.000171353	1.84169e-05	0.000100159	0.000238949	3.36632e-05	5.9446e-05	0	1.58464e-05	0	0.000231164	6.13695e-05	0.000147907	2.88667e-05	7.71218e-05	0	0	0	5.61104e-05
uncultured_Clostridia_bacterium	0	0	0	0	1.35847e-05	0	7.49344e-05	1.45866e-05	0.000168594	0.000112183	0.000294543	6.981e-05	0.000110649	0	0.000243396	0	0	0	0	0	0	0	0	0	0	0	0	1.36351e-05	0	0	0	0	0	1.66931e-05	0	0	0	0	0	0	0	0	0	1.44333e-05	0	0.000176266	4.32707e-05	8.66163e-05	0
uncultured_Clostridiales_bacterium	0	0	0	0	0	0	0	0	0	1.40229e-05	0	0	0	0	0	0	0	0	0	0	0	0	0	0	0	0	0	0	3.15398e-05	0	0	1.55775e-05	0	0	0	0	1.48615e-05	0	0	4.08436e-05	0	0	0	0	0	0	0	0	0
uncultured_Clostridium_sp.	3.10236e-05	0.000149132	0.00128322	0.000717966	0.000149432	0.000397965	0.00235294	0.00328199	0.00195288	0.00204734	7.01292e-05	0.00083772	0.00218531	0.000107456	0.00137447	3.28396e-05	0	0.000133507	0.00302092	6.71738e-05	0.00584177	0.00187981	0.000584485	0.000942881	0.00246265	6.01739e-05	0.000663063	2.72702e-05	0.000205009	0.001038	5.74655e-05	0.000171353	0.000331504	0.000383941	4.77897e-05	0.000488117	0.000520152	0.00310075	6.33854e-05	8.16871e-05	0.000123287	0.000705749	0	0.00588881	0.000655535	0.00202706	0.00139909	0.000101052	0.00100999
uncultured_Erysipelotrichaceae_bacterium	0	0	2.67337e-05	0.00233691	0	1.4213e-05	0.00119895	0	0	5.60915e-05	2.80517e-05	0.00230373	0	1.79093e-05	1.43174e-05	1.64198e-05	0	0.000148342	0	1.67935e-05	0	0	1.35927e-05	0	0	0	0	0	1.57699e-05	0.000122921	0	0	0	3.33862e-05	7.96495e-05	0.000319801	4.45845e-05	0	0	0	3.08219e-05	0	0	0	0	1.46888e-05	0	0	0
uncultured_Eubacterium_sp.	1.55118e-05	0.00010846	2.67337e-05	0.00132331	2.71695e-05	0.000156343	0.000209816	0.000102106	8.42969e-05	0	0.000154284	0.000153582	1.38311e-05	0	7.15871e-05	0	1.72052e-05	0.000237346	4.53138e-05	0	0	0.000114797	0.000720412	0.000314294	0	4.51304e-05	0.000100901	0.000545405	0	0.00207599	0	1.55775e-05	7.36675e-05	1.66931e-05	0	5.04948e-05	4.45845e-05	0	3.16927e-05	0	7.70547e-05	1.53424e-05	0	4.33e-05	3.85609e-05	8.81329e-05	0.000144236	0	0.000224442
uncultured_Firmicutes_bacterium	1.55118e-05	0	1.33668e-05	1.40778e-05	0	0	1.49869e-05	1.45866e-05	8.42969e-05	4.20687e-05	0	0.0140458	6.91553e-05	5.37278e-05	1.43174e-05	1.64198e-05	0	0.000385688	0	0	0	0	2.71854e-05	0	0	1.50435e-05	1.44144e-05	0.000436324	0	1.36578e-05	0	1.55775e-05	5.52507e-05	1.66931e-05	1.59299e-05	8.41581e-05	0.00010403	0	6.33854e-05	0	0	1.53424e-05	1.64341e-05	1.44333e-05	1.92805e-05	1.46888e-05	0.00111061	0.000158797	0
uncultured_Flavobacteriaceae_bacterium	0.000217165	2.7115e-05	0	0	0.000149432	2.8426e-05	0	0	0	0	0	0	0	0.000107456	0	0.000509014	0.000567771	4.45025e-05	0.000453138	0.00038625	0	0.000143497	0	0	1.35311e-05	0.000361043	5.76577e-05	0	0.000362707	0	0.000272961	0.000451749	1.84169e-05	0.000517486	0.000493827	0	0.000133753	0	0	0	0.000292808	6.13695e-05	0.000460155	0.0001299	0	0	0	0	5.61104e-05
uncultured_Kroppenstedtia_sp.	0.00114787	0.000122017	4.01005e-05	5.63111e-05	0.0008015	0.000454817	1.49869e-05	2.91732e-05	1.40495e-05	0	0	0	1.38311e-05	0.00238193	1.43174e-05	0.00236445	0.00249475	0.000192844	0.00167661	0.00250223	0.00013554	0.000717484	0	0.000382618	4.05932e-05	0.00225652	0.000230631	1.36351e-05	0.00154545	0	0.0015372	0.00190046	0.000386755	0.00205325	0.002501	0.000336632	0.000653906	1.3308e-05	0.000253542	2.7229e-05	0.00157192	0.000475613	0.00282667	0.00105363	0.00044345	0	0	1.44361e-05	0.000406801
uncultured_Lactobacillus_sp.	9.30709e-05	2.7115e-05	0	1.40778e-05	1.35847e-05	2.8426e-05	0	1.45866e-05	0	0	0	0	0	0.000107456	0	8.20991e-05	0.000189257	1.48342e-05	0.000105732	0.000167935	0	8.6098e-05	0	1.36649e-05	1.35311e-05	0.000150435	1.44144e-05	0	0.000141929	0	0.000114931	7.78877e-05	0.000147335	0.000233703	0.000207089	6.73265e-05	8.91689e-05	0	9.50781e-05	0	0.00016952	0.000107397	0.000180775	7.21667e-05	0.000154244	0	0	0	2.80552e-05
uncultured_Porphyromonadaceae_bacterium	0.000248189	2.7115e-05	5.34674e-05	0	0	0	1.49869e-05	7.29331e-05	0	0	0.00016831	0.000111696	2.76621e-05	0	2.86348e-05	0	0	0.000207678	0	0	0	0	0.000326224	0.000204974	0.000284152	0.000361043	0.000144144	0.000163621	0.000236548	0	0	0	0.000110501	0	0	5.04948e-05	0	0	1.58464e-05	0	4.62328e-05	6.13695e-05	0	0	7.71218e-05	2.93776e-05	0	1.44361e-05	0
uncultured_Roseburia_sp.	6.20472e-05	2.7115e-05	2.67337e-05	5.63111e-05	0	0.00221723	0.000134882	1.45866e-05	1.40495e-05	1.40229e-05	0.00016831	9.7734e-05	4.14932e-05	0	0.000572697	3.28396e-05	3.44104e-05	0.00987955	3.02092e-05	1.67935e-05	0.00013554	4.3049e-05	0.0113091	4.09948e-05	0.000514181	1.50435e-05	0	1.36351e-05	0	0.000641919	1.43664e-05	1.55775e-05	1.84169e-05	1.66931e-05	0.000159299	6.73265e-05	0.000445845	0	3.16927e-05	9.53016e-05	0	7.67118e-05	1.64341e-05	0	0	0.000235021	0.000158659	8.66163e-05	0
uncultured_Ruminococcaceae_bacterium	0.000325748	0	2.67337e-05	0.00297041	2.71695e-05	0.000213195	1.49869e-05	0.00125445	1.40495e-05	5.60915e-05	1.40258e-05	0.00132639	1.38311e-05	7.16371e-05	0	3.28396e-05	3.44104e-05	0.00108289	0	5.03804e-05	0	0.000186546	0.000434966	0	0	1.50435e-05	0	0	1.57699e-05	0.000122921	1.43664e-05	3.11551e-05	3.68338e-05	0	4.77897e-05	0.000572275	0.00059446	0	0	0	6.16437e-05	1.53424e-05	9.86047e-05	0.001732	3.85609e-05	0.00376034	0.00252412	5.77442e-05	0
uncultured_Ruminococcus_sp.	0	0	1.33668e-05	0	0	0	0.0164256	2.91732e-05	0	1.40229e-05	0	0	0	0.000214911	0	0	0	0	0	3.35869e-05	0	0	0	0	0	1.50435e-05	0	0	1.57699e-05	0	0	0	0	0	3.18598e-05	1.68316e-05	0	0	1.58464e-05	0	0	0	0	0	1.92805e-05	0	0	0	0
uncultured_Thermoanaerobacterales_bacterium	0	2.7115e-05	2.67337e-05	0	0	0	2.99738e-05	0	0	0	0	2.7924e-05	1.38311e-05	0	0.000744506	0	0	0	0	0	0	0	0	0	0	0	0	0	0	0	0	0	5.52507e-05	0	0	0	1.48615e-05	0	0	0	0	0	0	0	0	0	0	0	0
uncultured_Xanthomonas_sp.	0.000124094	4.06725e-05	0	0	8.15084e-05	2.8426e-05	0	0	0	0	0	0	0	0.000268639	0	0.000229878	0.000292488	1.48342e-05	0.000181255	0.000470217	1.3554e-05	7.17484e-05	0	4.09948e-05	0	0.000210609	0	0	0.000173469	0	7.18319e-05	9.34652e-05	0	0.000333862	0.000238949	0	7.43075e-05	0	1.58464e-05	0	0.000261986	3.06847e-05	0.000246512	0	0	0	0	0	5.61104e-05
uncultured_bacterium_adhufec311	0.000542913	5.42299e-05	4.01005e-05	5.63111e-05	0	0.000198982	0.000179843	2.91732e-05	0	4.20687e-05	1.40258e-05	0.000390936	0	0.000161183	0.00216193	1.64198e-05	0	0.000326351	0	5.03804e-05	0	0.000157846	0.000299039	0.00191309	8.11864e-05	9.02609e-05	0.00256577	1.36351e-05	0	1.36578e-05	0	6.23101e-05	0.00088401	3.33862e-05	4.77897e-05	0.00042079	2.9723e-05	0	3.16927e-05	0.000136145	3.08219e-05	1.53424e-05	0	0	0	0.000190955	0.000144236	1.44361e-05	0.000504994
uncultured_delta_proteobacterium	0.000201654	9.49024e-05	0.0025397	0.000183011	4.07542e-05	0.000198982	0.000179843	0.00157535	0.00276775	0.00082735	0.000476878	0.000111696	0.000871357	1.79093e-05	0.000529744	0	3.44104e-05	5.93366e-05	0	1.67935e-05	0	0.00087533	0.000611671	0.00142115	0.000135311	6.01739e-05	0.00145586	0.00511317	4.73097e-05	0.000204868	7.18319e-05	0.000264818	0.00058934	3.33862e-05	1.59299e-05	0.000185148	1.48615e-05	2.66159e-05	0.000792318	0.00232808	6.16437e-05	6.13695e-05	0	5.77334e-05	0	0.00139544	1.44236e-05	0.000577442	0.000729436
uncultured_gamma_proteobacterium	1.55118e-05	0	0	0	0	1.4213e-05	1.49869e-05	0	0	0	0	0	0	3.58185e-05	0	0	0	0	4.53138e-05	0	0	5.73987e-05	0	0	0	3.0087e-05	8.64865e-05	0	1.57699e-05	0	7.18319e-05	0	0.00154702	0	0	0.000908907	1.48615e-05	0	0.000459544	0	9.24656e-05	0.000276163	0	5.77334e-05	0.00154244	0	0	0	0
uncultured_hydrocarbon_seep_bacterium_BPC110	3.10236e-05	4.06725e-05	0	1.40778e-05	0	0	0	0	0	0	0	0	0	0	1.43174e-05	0	0	0	3.02092e-05	0	0	0	0	0	4.05932e-05	1.50435e-05	7.20721e-05	0	3.15398e-05	0	4.30991e-05	0	0.00209952	3.33862e-05	3.18598e-05	0.00104356	1.48615e-05	1.3308e-05	0.00069724	0	0.00016952	0.000629037	0	2.88667e-05	0.00229437	0	0	1.44361e-05	0
uncultured_prokaryote	0.000434331	0.000813449	0.000735176	0.00104175	9.50932e-05	0.00322636	0.00188835	0.00115234	0.00268345	4.20687e-05	0.000210388	0.00138224	0.00114798	0.000573097	0.00282053	0	0	0.00271465	0	0.000117554	0.00136895	0.00195156	0.00452636	0.000505603	0.00063596	0.000180522	0.0046991	0.000122716	1.57699e-05	0.000587287	2.87327e-05	0.000327128	0.000331504	0.000133545	0.000286738	0.00114455	0.00642016	3.99239e-05	0.000538776	0.000394821	0.000354451	0.000168766	0	0.00122683	0.000289207	0.00105759	0.000923108	0.000880599	0
uncultured_rumen_bacterium	0.00107032	0.000420282	0.000160402	0.0125855	0	0.0010944	0.000614462	0.00377793	4.21484e-05	0.000154252	5.61033e-05	0.00194072	0.0030705	0.000770099	0.0255423	4.92595e-05	3.44104e-05	0.00663087	1.51046e-05	3.35869e-05	1.3554e-05	0.00322868	0.000176705	0.0148675	0	1.50435e-05	0.00246486	2.72702e-05	3.15398e-05	0.00447977	5.74655e-05	0.000685412	0.00121551	3.33862e-05	0.0010673	0.00474652	0.00557306	1.3308e-05	0.000110924	0.000326748	0.000261986	0.000107397	3.28682e-05	0.00101033	3.85609e-05	0.000146888	0.00112504	2.88721e-05	0.0040119
uncultured_spirochete	3.10236e-05	9.49024e-05	0.000106935	0.000520877	1.35847e-05	0	8.99213e-05	5.83465e-05	1.40495e-05	1.40229e-05	0	0.000111696	1.38311e-05	0.000125365	0.0268738	1.64198e-05	0	0.000267015	0	0	0	0	0.000108741	0.000423613	9.47175e-05	0.000150435	0.00905225	5.45405e-05	6.30795e-05	0.00288181	2.87327e-05	0	0.000313087	1.66931e-05	0.000446037	0.00986333	0.006331	0	7.92318e-05	0	3.08219e-05	7.67118e-05	1.64341e-05	1.44333e-05	7.71218e-05	5.87553e-05	2.88471e-05	4.33082e-05	0.000673325
[truncated: 179 more columns]

## Sheet: otu_distribution
Sample	Kingdom	Phylum	Class	Order	Family	Genus	Species
JC100	64467	63204	63204	59712	59156	57767	6763
JC107	73760	73646	73646	73048	72561	71094	18105
JC108	74812	74779	74779	74701	74488	66855	13044
JC118	71034	71013	71013	70860	66129	62923	17646
JC119	73612	73121	73121	70595	70508	69388	1346
JC120	70358	70035	70035	68637	68113	62109	9290
JC132	66725	66705	66705	66679	66044	64001	13096
JC135	68556	68544	68544	68507	68095	62411	16830
JC140	71177	71138	71138	71128	71004	65654	20759
JC141	71312	69237	69237	69216	67350	65645	8548
JC145	71297	71281	71281	71274	71225	67667	19927
JC149	71623	71616	71616	71609	69037	67118	14849
JC151	72301	72295	72295	72288	70435	66049	16766
JC16	55837	54800	54800	51203	50810	49357	2677
JC162	69845	69827	69827	69812	68294	61830	17882
JC19	60902	59007	59007	53558	53249	51886	2606
JC2	58122	56013	56013	50712	50384	49034	2254
JC23	67412	67281	67281	66668	65561	62363	5352
JC25	66205	64661	64661	59758	59527	58228	5842
JC30	59547	57566	57566	52319	51991	50527	2466
JC31	73779	73662	73662	73185	72582	70551	13140
JC35	69688	69215	69215	67299	67091	64755	17010
JC40	73569	73551	73551	73515	69628	68191	22033
JC42	73180	73055	73055	72338	71520	66384	19768
JC43	73904	73793	73793	73353	73322	69091	21554
JC45	66474	65014	65014	60187	59963	58795	3378
JC47	69375	69035	69035	67554	66910	62104	6893
JC54	73340	73327	73327	73283	72861	61458	14027
JC61	63412	61610	61610	56646	56354	55191	3824
JC64	73218	73195	73195	73163	70392	64462	10479
JC69	69607	68647	68647	64433	64279	63485	3263
JC70	64195	62526	62526	58086	57567	56020	4356
JC75	54298	53423	53423	49684	49322	48062	9256
JC76	59905	58232	58232	53639	53331	51893	2990
JC81	62775	60759	60759	55392	54662	53166	2850
JC83	59412	58808	58808	56250	54414	52031	9970
JC89	67288	66598	66598	63963	59403	51735	13071
JC9	75143	75128	75128	75069	75055	74049	11611
JC93	63106	62625	62625	60339	60157	53099	12640
JF1	73451	73437	73437	73406	73342	43409	21701
JF109	64889	63446	63446	59340	58941	57413	6877
JF112	65179	64282	64282	60631	60410	59432	7864
JF116	60849	58887	58887	53257	52951	51596	2552
JF122	69284	68317	68317	64707	64252	51482	3926
JF128	51866	50879	50879	47340	46638	44982	9327
JF129	68079	68068	68068	68030	65265	63656	21200
JF138	69331	69312	69312	69299	69109	58713	18246
JF139	69271	69247	69247	69229	68624	64254	14025
JF14	71288	71004	71004	69762	69721	67042	12757
JF142	73306	73289	73289	73281	73198	71149	8475
JF144	64201	64093	64093	64072	63729	63233	3997
JF157	66366	66242	66242	66226	65927	56291	5487
JF158	71202	71060	71060	71045	70879	70406	16921
JF163	68996	68976	68976	68961	67320	65440	9396
JF166	69187	69161	69161	69148	61098	55280	12094
JF17	53148	52176	52176	48708	48499	47502	7804
JF170	71290	71280	71280	71260	71231	69926	36024
JF21	75325	75192	75192	74993	74947	70630	22312
JF24	70580	70216	70216	68552	65487	62808	14753
JF26	68265	67630	67630	64660	64051	56583	9432
JF28	58575	57880	57880	55263	53882	50814	10168
JF32	72326	72198	72198	71597	71551	70902	23643
JF39	61292	60843	60843	59174	58912	56308	12143
JF62	65113	63728	63728	58951	58675	56892	3622
JF63	54636	53694	53694	50761	50534	48358	9514
JF67	75603	75507	75507	74799	74771	68379	5746
JF78	74443	74375	74375	74029	73956	72602	19379
JF79	67377	66099	66099	59633	59280	58150	3107
JF8	56019	55147	55147	51998	45658	44630	9708
JF84	70997	70986	70986	70963	70534	67492	28164
JF85	61129	59293	59293	54110	53813	52432	3824
JF90	66219	65098	65098	61839	61214	59453	4092
JF91	71729	71603	71603	70912	69906	67608	13925
JF97	75825	75690	75690	75014	74922	72681	20948
JF99	72382	72096	72096	70888	70781	67875	16807
JM102	65160	64374	64374	61931	58140	55884	12981
JM103	51215	50378	50378	47623	46664	43358	7296
JM105	60057	58208	58208	53215	52874	51392	2973
JM106	73737	73719	73719	73626	73573	70429	14342
JM113	51901	50995	50995	47570	47337	45909	8423
JM115	74247	74218	74218	74084	72695	69234	21172
JM121	60996	58909	58909	54795	54259	52745	3719
JM131	66304	66288	66288	66247	63820	59290	12612
JM133	64836	64800	64800	64766	54970	44394	7162
JM136	70927	70921	70921	70903	70870	69796	22919
JM137	70781	70779	70779	70766	70372	67759	11040
JM143	68289	68278	68278	68264	66933	59612	16114
JM146	72528	72510	72510	72500	72471	69988	18623
JM155	70157	70140	70140	70124	68630	66795	11892
JM156	71336	71318	71318	71311	69567	63960	9822
JM160	69127	69120	69120	69106	64553	57578	9308
JM164	68859	68846	68846	68822	68786	67651	10213
JM167	70285	70267	70267	70237	70191	69303	20848
JM18	73557	73542	73542	73471	73442	72410	11269
JM29	69140	69112	69112	69005	67028	63722	18030
JM3	73696	73649	73649	73469	72894	67364	5998
JM36	62839	61373	61373	57686	57066	55391	11270
JM41	60824	59193	59193	53614	53310	51943	2814
JM5	70963	70734	70734	69683	67624	64314	18904
JM52	53111	52182	52182	48387	48152	47008	7447
JM55	55634	54134	54134	49871	49416	47290	2090
JM58	72840	72682	72682	71857	67430	65573	13612
JM60	68785	68683	68683	68279	67962	66966	15884
JM65	61984	60464	60464	55050	54740	53382	2892
JM68	74300	74222	74222	73864	73850	70671	8122
JM7	68774	68512	68512	67394	63868	59493	10319
JM74	67730	66960	66960	63125	62876	61260	12220
JM77	58972	57272	57272	51987	51658	50293	2523
JM80	66983	65672	65672	60468	60198	56330	3733
JM82	67746	67071	67071	64225	61435	58102	8549
JM87	73123	72986	72986	72321	72007	65256	12306
JM88	71650	71568	71568	71192	65662	61201	17926
JM95	75941	75879	75879	75661	74618	73534	7164
JM98	72127	71988	71988	71367	71296	69469	22232
ZC100	61701	60858	60858	58477	55404	53175	8606
ZC107	54165	51933	51933	47091	46732	45373	2189
ZC108	68970	68166	68166	64296	64009	62196	7197
ZC118	73105	73094	73094	73027	70842	66982	11492
ZC119	55549	53511	53511	48378	48044	46635	2243
ZC120	64885	64814	64814	64779	64666	58473	11559
ZC132	73343	73312	73312	73180	71526	69414	20189
ZC135	73241	73203	73203	73038	72460	68185	21111
ZC140	72709	72706	72706	72690	72686	71261	24312
ZC141	67198	67185	67185	66725	62822	56412	10703
ZC145	65920	64905	64905	61252	61028	59183	16143
ZC149	68152	67221	67221	63662	63303	61463	7722
ZC151	73360	73342	73342	73306	73099	71599	19258
ZC16	68821	68808	68808	68767	62810	59833	11536
ZC162	66800	66181	66181	64029	62761	55267	9787
ZC19	64271	64174	64174	63874	63079	54011	13433
ZC2	55836	53798	53798	48863	48588	47299	2147
ZC23	58318	56004	56004	50651	50332	48960	2199
ZC25	64015	63994	63994	63958	63914	62927	15665
ZC30	72672	72541	72541	71980	71907	67517	12263
ZC31	64078	62462	62462	58122	57787	56430	4089
ZC35	70026	69995	69995	69957	68332	63169	24664
ZC40	67360	67333	67333	67237	66680	64303	18647
ZC42	65792	65261	65261	63216	59940	56328	13611
ZC43	60392	58361	58361	52970	52675	51371	2918
ZC45	69657	69277	69277	67833	67748	65947	4531
ZC47	67086	67077	67077	67057	58343	51864	13030
ZC54	58518	56712	56712	51502	51194	49872	2706
ZC61	60039	57705	57705	52557	52250	50880	3027
ZC64	68668	68653	68653	68592	67853	59650	8494
ZC69	62205	60656	60656	56147	55869	54800	3091
ZC70	57953	55284	55284	50046	49723	48210	2190
ZC75	69888	69874	69874	69853	68703	65721	17329
ZC76	73188	73126	73126	72878	72845	70823	9070
ZC81	57573	55836	55836	51830	51530	49931	3099
ZC83	64486	64481	64481	64469	61927	58391	15463
ZC89	60167	59433	59433	57229	51504	45965	11563
ZC9	60896	58959	58959	53257	52981	51879	3561
ZC93	69017	69008	69008	68973	68358	60098	18409
ZF1	70541	70425	70425	69842	69802	68666	9999
ZF109	66587	66543	66543	66382	66184	63180	12815
ZF112	65969	64966	64966	62043	61883	60680	6331
ZF116	70074	69953	69953	69902	69818	58118	10132
ZF122	63237	61899	61899	58670	58082	55104	6655
ZF128	61882	60289	60289	55859	55633	53534	3973
ZF129	67306	66257	66257	63026	62187	60340	13219
ZF138	63917	62505	62505	57940	57606	55025	6427
ZF139	69895	69210	69210	66655	66567	62182	14160
ZF14	72994	72965	72965	72934	72866	69670	6943
ZF142	58320	56310	56310	51016	50713	49201	2389
ZF144	71720	71654	71654	71365	71346	68495	22599
ZF157	70316	70254	70254	70008	69981	67859	29044
ZF158	66311	65622	65622	63341	61572	56595	6768
ZF163	69955	69949	69949	69934	66400	58008	13214
ZF166	57022	54924	54924	49818	49493	48133	2306
ZF17	55754	53753	53753	48709	48370	47037	2301
ZF170	69887	69822	69822	69576	68556	65869	8810
ZF21	62521	61311	61311	57662	57400	56427	10085
ZF24	62550	61469	61469	58342	55496	53954	8809
ZF26	71938	71879	71879	71713	68635	65135	15845
ZF28	57917	55832	55832	50794	50489	49124	2441
ZF32	61481	59528	59528	54421	54146	53013	4253
ZF39	55988	53632	53632	48912	48559	47027	2445
ZF62	66897	65709	65709	61835	61660	57347	7586
ZF63	72652	72643	72643	72627	72338	68011	22039
ZF67	71813	71776	71776	71616	71593	62980	27689
ZF78	69218	69175	69175	68962	68915	67916	21296
ZF79	70897	70558	70558	69120	69026	67859	2693
ZF8	57701	56148	56148	51512	51267	50142	4364
ZF84	69456	69450	69450	69432	67379	65193	18887
ZF85	68432	68427	68427	68410	68287	65593	18725
ZF90	58151	55727	55727	51603	51355	50184	1934
ZF91	68054	67452	67452	65350	65246	48266	8555
ZF97	54260	52046	52046	47206	46912	45610	2175
ZF99	69357	69317	69317	69210	69197	67282	12662
ZM102	59628	57306	57306	52342	51985	50492	3008
ZM103	64712	63674	63674	60767	59561	56338	5991
ZM105	67971	67962	67962	67943	67429	63390	20286
ZM106	70650	70591	70591	70453	70393	67312	17728
ZM113	61071	59287	59287	54314	54054	52348	3893
ZM115	64645	62986	62986	57863	57607	56173	5957
ZM121	69187	69120	69120	68876	68748	66535	13643
ZM131	66759	66751	66751	66734	64856	58646	10273
ZM133	57573	55479	55479	50551	50262	48805	2542
ZM136	72900	72248	72248	69189	69070	65055	2257
ZM137	66592	66146	66146	64733	64161	60940	8613
ZM143	69459	69454	69454	69392	67459	58998	17729
ZM146	63308	61666	61666	56354	56054	54734	3897
ZM155	56413	54284	54284	49229	48929	47444	2319
ZM156	69299	69260	69260	69084	65732	57526	12657
ZM160	60915	58981	58981	54646	53736	51724	3721
ZM164	72102	71970	71970	71190	71144	69349	13151
ZM167	68655	68601	68601	68367	68362	67016	23450
ZM18	64005	63828	63828	63103	62717	62178	4938
ZM29	71780	71765	71765	71703	71029	70018	15658
ZM3	70124	70103	70103	70036	69953	67202	7189
ZM36	66698	66689	66689	66661	66509	64553	20995
ZM41	71751	71686	71686	71441	71407	70014	22074
ZM5	65647	65429	65429	64502	63524	59613	16094
ZM52	71308	71290	71290	71251	70877	68823	16899
ZM55	69593	69080	69080	66645	66494	60567	4370
ZM58	69601	69586	69586	69505	69449	66316	21511
ZM60	66857	66195	66195	63972	63828	62676	8740
ZM65	59382	57475	57475	52170	51855	50628	2474
ZM68	70360	70267	70267	69867	69847	66984	13784
ZM7	64840	64231	64231	62025	61921	60547	14492
ZM74	62804	60503	60503	54327	54037	52816	2620
ZM77	53992	51904	51904	47073	46747	45403	2150
ZM80	61876	61052	61052	58640	58499	52921	14772
ZM82	63023	62352	62352	60337	59273	55743	9337
ZM87	74081	73926	73926	73329	73248	72303	10076
ZM88	67670	67645	67645	67586	64389	57969	17092
ZM95	66092	66081	66081	66050	65958	63783	12267
ZM98	69745	69444	69444	68050	67933	66750	25942
